# Supplementary material for: Gene regulatory mechanisms guiding bifurcation of inhibitory and excitatory neuron lineages in the anterior brainstem
Source: bioRxiv preprint, doi:10.1101/2025.01.26.634960, version 2 (2025-05-28)
Supplement: Supplementary table 5 [file 634960_file25.xlsx]

## Sheet: Chromosome 1
	ATAC features
			conserved
			FALSE	TRUE
	feature	FALSE	166215607	13180326		p-value	2.2e-16
		TRUE	10395166	2580872		OR	3.13098
	exons
			conserved
			FALSE	TRUE
	exon	FALSE	170370788	12714646		p-value	2.2e-16
		TRUE	6239985	3046552		OR	6.54208
	introns
			conserved
			FALSE	TRUE
	intron	FALSE	100462454	8781903		p-value	2.2e-16
		TRUE	76148319	6979295		OR	1.04853

## Sheet: Chromosome 2
	ATAC features
			conserved
			FALSE	TRUE
	feature	FALSE	150362648	14593529		p-value	2.2e-16
		TRUE	10846323	3160724		OR	3.00236
	exons
			conserved
			FALSE	TRUE
	exon	FALSE	155295558	14128670		p-value	2.2e-16
		TRUE	5913413	3625583		OR	6.73993
	introns
			conserved
			FALSE	TRUE
	intron	FALSE	83509221	9315937		p-value	1
		TRUE	77699750	8438316		OR	0.973513

## Sheet: Chromosome 3
	ATAC features
			conserved
			FALSE	TRUE
	feature	FALSE	135449596	11153413		p-value	2.2e-16
		TRUE	8005569	2331102		OR	3.53598
	exons
			conserved
			FALSE	TRUE
	exon	FALSE	138896691	11070806		p-value	2.2e-16
		TRUE	4558474	2413709		OR	6.64321
	introns
			conserved
			FALSE	TRUE
	intron	FALSE	88923720	7930830		p-value	2.2e-16
		TRUE	54531445	5553685		OR	1.14191

## Sheet: Chromosome 4
	ATAC features
			conserved
			FALSE	TRUE
	feature	FALSE	130180769	11334077		p-value	2.2e-16
		TRUE	9062747	2730523		OR	3.46035
	exons
			conserved
			FALSE	TRUE
	exon	FALSE	135538238	11392476		p-value	2.2e-16
		TRUE	3705278	2672124		OR	8.57993
	introns
			conserved
			FALSE	TRUE
	intron	FALSE	79727606	7797569		p-value	2.2e-16
		TRUE	59515910	6267031		OR	1.07666

## Sheet: Chromosome 5
	ATAC features
			conserved
			FALSE	TRUE
	feature	FALSE	126803728	10430330		p-value	2.2e-16
		TRUE	9365835	2134791		OR	2.77099
	exons
			conserved
			FALSE	TRUE
	exon	FALSE	130397113	9823196		p-value	2.2e-16
		TRUE	5772450	2741925		OR	6.30537
	introns
			conserved
			FALSE	TRUE
	intron	FALSE	72134030	6749095		p-value	1
		TRUE	64035533	5816026		OR	0.970728

## Sheet: Chromosome 6
	ATAC features
			conserved
			FALSE	TRUE
	feature	FALSE	125674499	10554480		p-value	2.2e-16
		TRUE	8230578	2076989		OR	3.00499
	exons
			conserved
			FALSE	TRUE
	exon	FALSE	128976768	10262943		p-value	2.2e-16
		TRUE	4928309	2368526		OR	6.03886
	introns
			conserved
			FALSE	TRUE
	intron	FALSE	73105931	6576337		p-value	2.2e-16
		TRUE	60799146	6055132		OR	1.10712

## Sheet: Chromosome 7
	ATAC features
			conserved
			FALSE	TRUE
	feature	FALSE	121761208	10750526		p-value	2.2e-16
		TRUE	7921887	1907838		OR	2.72765
	exons
			conserved
			FALSE	TRUE
	exon	FALSE	122041727	9356214		p-value	2.2e-16
		TRUE	7641368	3302150		OR	5.63658
	introns
			conserved
			FALSE	TRUE
	intron	FALSE	68631443	6678560		p-value	2.2e-16
		TRUE	61051652	5979804		OR	1.00654

## Sheet: Chromosome 8
	ATAC features
			conserved
			FALSE	TRUE
	feature	FALSE	107578826	8813551		p-value	2.2e-16
		TRUE	7919947	1988889		OR	3.06525
	exons
			conserved
			FALSE	TRUE
	exon	FALSE	111529353	8769735		p-value	2.2e-16
		TRUE	3969420	2032705		OR	6.51253
	introns
			conserved
			FALSE	TRUE
	intron	FALSE	60703446	5784114		p-value	1
		TRUE	54795327	5018326		OR	0.961142

## Sheet: Chromosome 9
	ATAC features
			conserved
			FALSE	TRUE
	feature	FALSE	101944784	9549976		p-value	2.2e-16
		TRUE	8004640	1995735		OR	2.66149
	exons
			conserved
			FALSE	TRUE
	exon	FALSE	105054168	9034209		p-value	2.2e-16
		TRUE	4895256	2511502		OR	5.96566
	introns
			conserved
			FALSE	TRUE
	intron	FALSE	54820940	5921446		p-value	1
		TRUE	55128484	5624265		OR	0.944489

## Sheet: Chromosome 10
	ATAC features
			conserved
			FALSE	TRUE
	feature	FALSE	109105408	9078273		p-value	2.2e-16
		TRUE	7461621	1849691		OR	2.97951
	exons
			conserved
			FALSE	TRUE
	exon	FALSE	112493719	8684527		p-value	2.2e-16
		TRUE	4073310	2243437		OR	7.13427
	introns
			conserved
			FALSE	TRUE
	intron	FALSE	60882054	5811621		p-value	1
		TRUE	55684975	5116343		OR	0.962519

[truncated: 13 more sheets: Chromosome 11, Chromosome 12, Chromosome 13, Chromosome 14, Chromosome 15, Chromosome 16, Chromosome 17, Chromosome 18, Chromosome 19, Tal1, Gata2, Gata3, Vsx2]
