# Supplementary material for: Gene regulatory mechanisms guiding bifurcation of inhibitory and excitatory neuron lineages in the anterior brainstem
Source: bioRxiv preprint, doi:10.1101/2025.01.26.634960, version 2 (2025-05-28)
Supplement: Supplementary table 7 [file 634960_file27.xlsx]

## Sheet: Tal1 targets
Supplementary Table 7 Selector gene target analysis results.
feature	zscore	links_pvalue	TFBS_name	gene_name	GA1_2_exp_avg_log2	GL1_2_exp_avg_log2	avg_log2FC
chr1-155741611-155743304	6.098	0	TAL1.H12CORE.0.P.B_TAL1.H12CORE.0.P.B	Lhx4	0.068	2.018	-1.951
chr1-155741611-155743304	6.098	0	TAL1.H12CORE.2.P.B_TAL1.H12CORE.2.P.B	Lhx4	0.068	2.018	-1.951
chr1-155741611-155743304	6.098	0	TAL1.H12CORE.0.P.B_TAL1.H12CORE.0.P.B	Lhx4	0.068	2.018	-1.951
chr1-155741611-155743304	6.098	0	TAL1.H12CORE.2.P.B_TAL1.H12CORE.2.P.B	Lhx4	0.068	2.018	-1.951
chr3-102010883-102013279	4.706	0	TAL1.H12CORE.1.P.B_TAL1.H12CORE.1.P.B	Nhlh2	0.111	2.045	-1.933
chr3-102010883-102013279	4.706	0	TAL1.H12CORE.2.P.B_TAL1.H12CORE.2.P.B	Nhlh2	0.111	2.045	-1.933
chr3-102010883-102013279	4.706	0	TAL1.H12CORE.2.P.B_TAL1.H12CORE.2.P.B	Nhlh2	0.111	2.045	-1.933
chr3-102010883-102013279	4.706	0	TAL1.H12CORE.1.P.B_TAL1.H12CORE.1.P.B	Nhlh2	0.111	2.045	-1.933
chr3-102010883-102013279	4.706	0	TAL1.H12CORE.2.P.B_TAL1.H12CORE.2.P.B	Nhlh2	0.111	2.045	-1.933
chr3-102010883-102013279	4.706	0	TAL1.H12CORE.2.P.B_TAL1.H12CORE.2.P.B	Nhlh2	0.111	2.045	-1.933
chr4-45823941-45825253	4.776	0	TAL1.H12CORE.1.P.B_TAL1.H12CORE.1.P.B	Igfbpl1	0.319	2.032	-1.713
chr4-45823941-45825253	4.776	0	TAL1.H12CORE.2.P.B_TAL1.H12CORE.2.P.B	Igfbpl1	0.319	2.032	-1.713
chr4-45823941-45825253	4.776	0	TAL1.H12CORE.2.P.B_TAL1.H12CORE.2.P.B	Igfbpl1	0.319	2.032	-1.713
chr4-45823941-45825253	4.776	0	TAL1.H12CORE.1.P.B_TAL1.H12CORE.1.P.B	Igfbpl1	0.319	2.032	-1.713
chr4-45823941-45825253	4.776	0	TAL1.H12CORE.2.P.B_TAL1.H12CORE.2.P.B	Igfbpl1	0.319	2.032	-1.713
chr4-45823941-45825253	4.776	0	TAL1.H12CORE.2.P.B_TAL1.H12CORE.2.P.B	Igfbpl1	0.319	2.032	-1.713
chr5-101425518-101427189	4.3	0	TAL1.H12CORE.1.P.B_TAL1.H12CORE.1.P.B	Nkx6-1	0.24	1.706	-1.466
chr5-101425518-101427189	4.3	0	TAL1.H12CORE.1.P.B_TAL1.H12CORE.1.P.B	Nkx6-1	0.24	1.706	-1.466
chr5-101425518-101427189	4.3	0	TAL1.H12CORE.2.P.B_TAL1.H12CORE.2.P.B	Nkx6-1	0.24	1.706	-1.466
chr5-101425518-101427189	4.3	0	TAL1.H12CORE.1.P.B_TAL1.H12CORE.1.P.B	Nkx6-1	0.24	1.706	-1.466
chr5-101425518-101427189	4.3	0	TAL1.H12CORE.1.P.B_TAL1.H12CORE.1.P.B	Nkx6-1	0.24	1.706	-1.466
chr5-101425518-101427189	4.3	0	TAL1.H12CORE.2.P.B_TAL1.H12CORE.2.P.B	Nkx6-1	0.24	1.706	-1.466
chr5-101520559-101521697	4.146	0	TAL1.H12CORE.1.P.B_TAL1.H12CORE.1.P.B	Nkx6-1	0.24	1.706	-1.466
chr5-101520559-101521697	4.146	0	TAL1.H12CORE.2.P.B_TAL1.H12CORE.2.P.B	Nkx6-1	0.24	1.706	-1.466
chr5-101520559-101521697	4.146	0	TAL1.H12CORE.1.P.B_TAL1.H12CORE.1.P.B	Nkx6-1	0.24	1.706	-1.466
chr5-101520559-101521697	4.146	0	TAL1.H12CORE.2.P.B_TAL1.H12CORE.2.P.B	Nkx6-1	0.24	1.706	-1.466
chr9-64020128-64023238	-2.459	0.007	TAL1.H12CORE.2.P.B_TAL1.H12CORE.2.P.B	Skor1	0.008	1.186	-1.178
chr9-64020128-64023238	-2.459	0.007	TAL1.H12CORE.2.P.B_TAL1.H12CORE.2.P.B	Skor1	0.008	1.186	-1.178
chr9-64020128-64023238	-2.459	0.007	TAL1.H12CORE.2.P.B_TAL1.H12CORE.2.P.B	Skor1	0.008	1.186	-1.178
chr9-64020128-64023238	-2.459	0.007	TAL1.H12CORE.2.P.B_TAL1.H12CORE.2.P.B	Skor1	0.008	1.186	-1.178
chr1-127555741-127556787	2.702	0.003	TAL1.H12CORE.1.P.B_TAL1.H12CORE.1.P.B	Tmem163	0.093	1.255	-1.162
chr1-127555741-127556787	2.702	0.003	TAL1.H12CORE.1.P.B_TAL1.H12CORE.1.P.B	Tmem163	0.093	1.255	-1.162
chr1-127555741-127556787	2.702	0.003	TAL1.H12CORE.2.P.B_TAL1.H12CORE.2.P.B	Tmem163	0.093	1.255	-1.162
chr1-127555741-127556787	2.702	0.003	TAL1.H12CORE.2.P.B_TAL1.H12CORE.2.P.B	Tmem163	0.093	1.255	-1.162
chr1-127555741-127556787	2.702	0.003	TAL1.H12CORE.2.P.B_TAL1.H12CORE.2.P.B	Tmem163	0.093	1.255	-1.162
chr1-127555741-127556787	2.702	0.003	TAL1.H12CORE.1.P.B_TAL1.H12CORE.1.P.B	Tmem163	0.093	1.255	-1.162
chr1-127555741-127556787	2.702	0.003	TAL1.H12CORE.1.P.B_TAL1.H12CORE.1.P.B	Tmem163	0.093	1.255	-1.162
chr1-127555741-127556787	2.702	0.003	TAL1.H12CORE.2.P.B_TAL1.H12CORE.2.P.B	Tmem163	0.093	1.255	-1.162
chr1-127555741-127556787	2.702	0.003	TAL1.H12CORE.2.P.B_TAL1.H12CORE.2.P.B	Tmem163	0.093	1.255	-1.162
chr1-127555741-127556787	2.702	0.003	TAL1.H12CORE.2.P.B_TAL1.H12CORE.2.P.B	Tmem163	0.093	1.255	-1.162
chr1-128471634-128473179	-3.249	0.001	TAL1.H12CORE.0.P.B_TAL1.H12CORE.0.P.B	Tmem163	0.093	1.255	-1.162
chr1-128471634-128473179	-3.249	0.001	TAL1.H12CORE.1.P.B_TAL1.H12CORE.1.P.B	Tmem163	0.093	1.255	-1.162
chr1-128471634-128473179	-3.249	0.001	TAL1.H12CORE.0.P.B_TAL1.H12CORE.0.P.B	Tmem163	0.093	1.255	-1.162
chr1-128471634-128473179	-3.249	0.001	TAL1.H12CORE.1.P.B_TAL1.H12CORE.1.P.B	Tmem163	0.093	1.255	-1.162
chr14-67233016-67233653	3.118	0.001	TAL1.H12CORE.2.P.B_TAL1.H12CORE.2.P.B	Ebf2	0.51	1.559	-1.049
chr14-67233016-67233653	3.118	0.001	TAL1.H12CORE.2.P.B_TAL1.H12CORE.2.P.B	Ebf2	0.51	1.559	-1.049
chr14-67344228-67345756	3.259	0.001	TAL1.H12CORE.2.P.B_TAL1.H12CORE.2.P.B	Ebf2	0.51	1.559	-1.049
chr14-67344228-67345756	3.259	0.001	TAL1.H12CORE.2.P.B_TAL1.H12CORE.2.P.B	Ebf2	0.51	1.559	-1.049
chr12-105973378-105974516	-2.688	0.004	TAL1.H12CORE.2.P.B_TAL1.H12CORE.2.P.B	Bcl11b	0.695	1.604	-0.908
chr12-105973378-105974516	-2.688	0.004	TAL1.H12CORE.2.P.B_TAL1.H12CORE.2.P.B	Bcl11b	0.695	1.604	-0.908
chr12-108265336-108266559	-2.499	0.006	TAL1.H12CORE.2.P.B_TAL1.H12CORE.2.P.B	Bcl11b	0.695	1.604	-0.908
chr12-108265336-108266559	-2.499	0.006	TAL1.H12CORE.2.P.B_TAL1.H12CORE.2.P.B	Bcl11b	0.695	1.604	-0.908
chr9-64020128-64023238	-2.804	0.003	TAL1.H12CORE.2.P.B_TAL1.H12CORE.2.P.B	2300009A05Rik	0.378	1.169	-0.79
chr9-64020128-64023238	-2.804	0.003	TAL1.H12CORE.2.P.B_TAL1.H12CORE.2.P.B	2300009A05Rik	0.378	1.169	-0.79
chr9-64020128-64023238	-2.804	0.003	TAL1.H12CORE.2.P.B_TAL1.H12CORE.2.P.B	2300009A05Rik	0.378	1.169	-0.79
chr9-64020128-64023238	-2.804	0.003	TAL1.H12CORE.2.P.B_TAL1.H12CORE.2.P.B	2300009A05Rik	0.378	1.169	-0.79
chr1-172314557-172315270	5.764	0	TAL1.H12CORE.1.P.B_TAL1.H12CORE.1.P.B	Nhlh1	0.124	0.83	-0.706
chr1-172314557-172315270	5.764	0	TAL1.H12CORE.1.P.B_TAL1.H12CORE.1.P.B	Nhlh1	0.124	0.83	-0.706
chr1-172349389-172350767	2.987	0.001	TAL1.H12CORE.2.P.B_TAL1.H12CORE.2.P.B	Nhlh1	0.124	0.83	-0.706
chr1-172349389-172350767	2.987	0.001	TAL1.H12CORE.2.P.B_TAL1.H12CORE.2.P.B	Nhlh1	0.124	0.83	-0.706
chr12-108265336-108266559	2.605	0.005	TAL1.H12CORE.2.P.B_TAL1.H12CORE.2.P.B	Dlk1	0.171	0.859	-0.688
chr12-108265336-108266559	2.605	0.005	TAL1.H12CORE.2.P.B_TAL1.H12CORE.2.P.B	Dlk1	0.171	0.859	-0.688
chr8-70656073-70657064	-3.864	0	TAL1.H12CORE.1.P.B_TAL1.H12CORE.1.P.B	Jund	2.859	3.52	-0.661
chr6-88973625-88974892	2.348	0.009	TAL1.H12CORE.1.P.B_TAL1.H12CORE.1.P.B	Podxl2	1.618	2.278	-0.66
chr6-88973625-88974892	2.348	0.009	TAL1.H12CORE.2.P.B_TAL1.H12CORE.2.P.B	Podxl2	1.618	2.278	-0.66
chr6-88973625-88974892	2.348	0.009	TAL1.H12CORE.1.P.B_TAL1.H12CORE.1.P.B	Podxl2	1.618	2.278	-0.66
chr6-88973625-88974892	2.348	0.009	TAL1.H12CORE.2.P.B_TAL1.H12CORE.2.P.B	Podxl2	1.618	2.278	-0.66
chr3-8865440-8867082	-3.257	0.001	TAL1.H12CORE.1.P.B_TAL1.H12CORE.1.P.B	Zfhx4	0.443	1.085	-0.642
chr3-8865440-8867082	-3.257	0.001	TAL1.H12CORE.1.P.B_TAL1.H12CORE.1.P.B	Zfhx4	0.443	1.085	-0.642
chr3-8865440-8867082	-3.257	0.001	TAL1.H12CORE.2.P.B_TAL1.H12CORE.2.P.B	Zfhx4	0.443	1.085	-0.642
chr3-8865440-8867082	-3.257	0.001	TAL1.H12CORE.1.P.B_TAL1.H12CORE.1.P.B	Zfhx4	0.443	1.085	-0.642
chr3-8865440-8867082	-3.257	0.001	TAL1.H12CORE.1.P.B_TAL1.H12CORE.1.P.B	Zfhx4	0.443	1.085	-0.642
chr3-8865440-8867082	-3.257	0.001	TAL1.H12CORE.2.P.B_TAL1.H12CORE.2.P.B	Zfhx4	0.443	1.085	-0.642
chr8-105468928-105469688	3.987	0	TAL1.H12CORE.1.P.B_TAL1.H12CORE.1.P.B	Tppp3	0.142	0.757	-0.614
chr8-105468928-105469688	3.987	0	TAL1.H12CORE.1.P.B_TAL1.H12CORE.1.P.B	Tppp3	0.142	0.757	-0.614
chr8-105468928-105469688	3.987	0	TAL1.H12CORE.1.P.B_TAL1.H12CORE.1.P.B	Tppp3	0.142	0.757	-0.614
chr8-105468928-105469688	3.987	0	TAL1.H12CORE.2.P.B_TAL1.H12CORE.2.P.B	Tppp3	0.142	0.757	-0.614
chr8-105468928-105469688	3.987	0	TAL1.H12CORE.2.P.B_TAL1.H12CORE.2.P.B	Tppp3	0.142	0.757	-0.614
chr8-105468928-105469688	3.987	0	TAL1.H12CORE.1.P.B_TAL1.H12CORE.1.P.B	Tppp3	0.142	0.757	-0.614
chr8-105468928-105469688	3.987	0	TAL1.H12CORE.1.P.B_TAL1.H12CORE.1.P.B	Tppp3	0.142	0.757	-0.614
chr8-105468928-105469688	3.987	0	TAL1.H12CORE.1.P.B_TAL1.H12CORE.1.P.B	Tppp3	0.142	0.757	-0.614
chr8-105468928-105469688	3.987	0	TAL1.H12CORE.2.P.B_TAL1.H12CORE.2.P.B	Tppp3	0.142	0.757	-0.614
chr8-105468928-105469688	3.987	0	TAL1.H12CORE.2.P.B_TAL1.H12CORE.2.P.B	Tppp3	0.142	0.757	-0.614
chr12-112333061-112335277	2.512	0.006	TAL1.H12CORE.1.P.B_TAL1.H12CORE.1.P.B	Kif26a	0.076	0.689	-0.613
chr12-112333061-112335277	2.512	0.006	TAL1.H12CORE.2.P.B_TAL1.H12CORE.2.P.B	Kif26a	0.076	0.689	-0.613
chr12-112333061-112335277	2.512	0.006	TAL1.H12CORE.1.P.B_TAL1.H12CORE.1.P.B	Kif26a	0.076	0.689	-0.613
chr12-112333061-112335277	2.512	0.006	TAL1.H12CORE.2.P.B_TAL1.H12CORE.2.P.B	Kif26a	0.076	0.689	-0.613
chr3-8509842-8511726	2.684	0.004	TAL1.H12CORE.2.P.B_TAL1.H12CORE.2.P.B	Stmn2	3.802	4.392	-0.59
chr3-8509842-8511726	2.684	0.004	TAL1.H12CORE.2.P.B_TAL1.H12CORE.2.P.B	Stmn2	3.802	4.392	-0.59
chr3-8865440-8867082	-3.067	0.001	TAL1.H12CORE.1.P.B_TAL1.H12CORE.1.P.B	Stmn2	3.802	4.392	-0.59
chr3-8865440-8867082	-3.067	0.001	TAL1.H12CORE.1.P.B_TAL1.H12CORE.1.P.B	Stmn2	3.802	4.392	-0.59
chr3-8865440-8867082	-3.067	0.001	TAL1.H12CORE.2.P.B_TAL1.H12CORE.2.P.B	Stmn2	3.802	4.392	-0.59
chr3-8865440-8867082	-3.067	0.001	TAL1.H12CORE.1.P.B_TAL1.H12CORE.1.P.B	Stmn2	3.802	4.392	-0.59
chr3-8865440-8867082	-3.067	0.001	TAL1.H12CORE.1.P.B_TAL1.H12CORE.1.P.B	Stmn2	3.802	4.392	-0.59
chr3-8865440-8867082	-3.067	0.001	TAL1.H12CORE.2.P.B_TAL1.H12CORE.2.P.B	Stmn2	3.802	4.392	-0.59
chr13-83720827-83722546	3.795	0	TAL1.H12CORE.1.P.B_TAL1.H12CORE.1.P.B	Gm17750	0.141	0.687	-0.546
chr13-83720827-83722546	3.795	0	TAL1.H12CORE.1.P.B_TAL1.H12CORE.1.P.B	Gm17750	0.141	0.687	-0.546
chr13-83720827-83722546	3.795	0	TAL1.H12CORE.2.P.B_TAL1.H12CORE.2.P.B	Gm17750	0.141	0.687	-0.546
chr13-83720827-83722546	3.795	0	TAL1.H12CORE.1.P.B_TAL1.H12CORE.1.P.B	Gm17750	0.141	0.687	-0.546
chr13-83720827-83722546	3.795	0	TAL1.H12CORE.1.P.B_TAL1.H12CORE.1.P.B	Gm17750	0.141	0.687	-0.546
chr13-83720827-83722546	3.795	0	TAL1.H12CORE.2.P.B_TAL1.H12CORE.2.P.B	Gm17750	0.141	0.687	-0.546
chr13-83739284-83740069	3.954	0	TAL1.H12CORE.1.P.B_TAL1.H12CORE.1.P.B	Gm17750	0.141	0.687	-0.546
chr13-83739284-83740069	3.954	0	TAL1.H12CORE.2.P.B_TAL1.H12CORE.2.P.B	Gm17750	0.141	0.687	-0.546
chr13-83739284-83740069	3.954	0	TAL1.H12CORE.2.P.B_TAL1.H12CORE.2.P.B	Gm17750	0.141	0.687	-0.546
chr13-83739284-83740069	3.954	0	TAL1.H12CORE.1.P.B_TAL1.H12CORE.1.P.B	Gm17750	0.141	0.687	-0.546
chr13-83739284-83740069	3.954	0	TAL1.H12CORE.2.P.B_TAL1.H12CORE.2.P.B	Gm17750	0.141	0.687	-0.546
chr13-83739284-83740069	3.954	0	TAL1.H12CORE.2.P.B_TAL1.H12CORE.2.P.B	Gm17750	0.141	0.687	-0.546
chr13-84058831-84060292	4.216	0	TAL1.H12CORE.0.P.B_TAL1.H12CORE.0.P.B	Gm17750	0.141	0.687	-0.546
chr13-84058831-84060292	4.216	0	TAL1.H12CORE.1.P.B_TAL1.H12CORE.1.P.B	Gm17750	0.141	0.687	-0.546
chr13-84058831-84060292	4.216	0	TAL1.H12CORE.0.P.B_TAL1.H12CORE.0.P.B	Gm17750	0.141	0.687	-0.546
chr13-84058831-84060292	4.216	0	TAL1.H12CORE.1.P.B_TAL1.H12CORE.1.P.B	Gm17750	0.141	0.687	-0.546
chr13-84347089-84348834	2.502	0.006	TAL1.H12CORE.2.P.B_TAL1.H12CORE.2.P.B	Gm17750	0.141	0.687	-0.546
chr13-84347089-84348834	2.502	0.006	TAL1.H12CORE.2.P.B_TAL1.H12CORE.2.P.B	Gm17750	0.141	0.687	-0.546
chr13-84565249-84566694	4.475	0	TAL1.H12CORE.0.P.B_TAL1.H12CORE.0.P.B	Gm17750	0.141	0.687	-0.546
chr13-84565249-84566694	4.475	0	TAL1.H12CORE.1.P.B_TAL1.H12CORE.1.P.B	Gm17750	0.141	0.687	-0.546
chr13-84565249-84566694	4.475	0	TAL1.H12CORE.1.P.B_TAL1.H12CORE.1.P.B	Gm17750	0.141	0.687	-0.546
chr13-84565249-84566694	4.475	0	TAL1.H12CORE.1.P.B_TAL1.H12CORE.1.P.B	Gm17750	0.141	0.687	-0.546
chr13-84565249-84566694	4.475	0	TAL1.H12CORE.1.P.B_TAL1.H12CORE.1.P.B	Gm17750	0.141	0.687	-0.546
chr13-84565249-84566694	4.475	0	TAL1.H12CORE.2.P.B_TAL1.H12CORE.2.P.B	Gm17750	0.141	0.687	-0.546
chr13-84565249-84566694	4.475	0	TAL1.H12CORE.2.P.B_TAL1.H12CORE.2.P.B	Gm17750	0.141	0.687	-0.546
chr13-84565249-84566694	4.475	0	TAL1.H12CORE.0.P.B_TAL1.H12CORE.0.P.B	Gm17750	0.141	0.687	-0.546
chr13-84565249-84566694	4.475	0	TAL1.H12CORE.1.P.B_TAL1.H12CORE.1.P.B	Gm17750	0.141	0.687	-0.546
chr13-84565249-84566694	4.475	0	TAL1.H12CORE.1.P.B_TAL1.H12CORE.1.P.B	Gm17750	0.141	0.687	-0.546
chr13-84565249-84566694	4.475	0	TAL1.H12CORE.1.P.B_TAL1.H12CORE.1.P.B	Gm17750	0.141	0.687	-0.546
chr13-84565249-84566694	4.475	0	TAL1.H12CORE.1.P.B_TAL1.H12CORE.1.P.B	Gm17750	0.141	0.687	-0.546
chr13-84565249-84566694	4.475	0	TAL1.H12CORE.2.P.B_TAL1.H12CORE.2.P.B	Gm17750	0.141	0.687	-0.546
chr13-84565249-84566694	4.475	0	TAL1.H12CORE.2.P.B_TAL1.H12CORE.2.P.B	Gm17750	0.141	0.687	-0.546
chr13-84570705-84572145	3.326	0	TAL1.H12CORE.0.P.B_TAL1.H12CORE.0.P.B	Gm17750	0.141	0.687	-0.546
chr13-84570705-84572145	3.326	0	TAL1.H12CORE.0.P.B_TAL1.H12CORE.0.P.B	Gm17750	0.141	0.687	-0.546
chr10-80259789-80261976	-2.61	0.005	TAL1.H12CORE.2.P.B_TAL1.H12CORE.2.P.B	Aes	1.385	1.865	-0.48
chr10-80259789-80261976	-2.61	0.005	TAL1.H12CORE.2.P.B_TAL1.H12CORE.2.P.B	Aes	1.385	1.865	-0.48
chr2-180890250-180891665	-3.047	0.001	TAL1.H12CORE.2.P.B_TAL1.H12CORE.2.P.B	Nkain4	0.898	1.366	-0.468
chr2-180890250-180891665	-3.047	0.001	TAL1.H12CORE.2.P.B_TAL1.H12CORE.2.P.B	Nkain4	0.898	1.366	-0.468
chr19-47013993-47015844	3.73	0	TAL1.H12CORE.2.P.B_TAL1.H12CORE.2.P.B	Ina	2.488	2.953	-0.466
chr19-47013993-47015844	3.73	0	TAL1.H12CORE.2.P.B_TAL1.H12CORE.2.P.B	Ina	2.488	2.953	-0.466
chr15-25761501-25763471	-3.528	0	TAL1.H12CORE.2.P.B_TAL1.H12CORE.2.P.B	Basp1	4.833	5.286	-0.453
chr15-25761501-25763471	-3.528	0	TAL1.H12CORE.2.P.B_TAL1.H12CORE.2.P.B	Basp1	4.833	5.286	-0.453
chr11-98741403-98743319	-3.059	0.001	TAL1.H12CORE.1.P.B_TAL1.H12CORE.1.P.B	Krt26	0.05	0.497	-0.448
chr11-98741403-98743319	-3.059	0.001	TAL1.H12CORE.2.P.B_TAL1.H12CORE.2.P.B	Krt26	0.05	0.497	-0.448
chr11-98741403-98743319	-3.059	0.001	TAL1.H12CORE.2.P.B_TAL1.H12CORE.2.P.B	Krt26	0.05	0.497	-0.448
chr11-98741403-98743319	-3.059	0.001	TAL1.H12CORE.1.P.B_TAL1.H12CORE.1.P.B	Krt26	0.05	0.497	-0.448
chr11-98741403-98743319	-3.059	0.001	TAL1.H12CORE.2.P.B_TAL1.H12CORE.2.P.B	Krt26	0.05	0.497	-0.448
chr11-98741403-98743319	-3.059	0.001	TAL1.H12CORE.2.P.B_TAL1.H12CORE.2.P.B	Krt26	0.05	0.497	-0.448
chr11-98748370-98751340	-3.639	0	TAL1.H12CORE.1.P.B_TAL1.H12CORE.1.P.B	Krt26	0.05	0.497	-0.448
chr11-98748370-98751340	-3.639	0	TAL1.H12CORE.1.P.B_TAL1.H12CORE.1.P.B	Krt26	0.05	0.497	-0.448
chr11-98748370-98751340	-3.639	0	TAL1.H12CORE.1.P.B_TAL1.H12CORE.1.P.B	Krt26	0.05	0.497	-0.448
chr11-98748370-98751340	-3.639	0	TAL1.H12CORE.2.P.B_TAL1.H12CORE.2.P.B	Krt26	0.05	0.497	-0.448
chr11-98748370-98751340	-3.639	0	TAL1.H12CORE.2.P.B_TAL1.H12CORE.2.P.B	Krt26	0.05	0.497	-0.448
chr11-98748370-98751340	-3.639	0	TAL1.H12CORE.2.P.B_TAL1.H12CORE.2.P.B	Krt26	0.05	0.497	-0.448
chr11-98748370-98751340	-3.639	0	TAL1.H12CORE.2.P.B_TAL1.H12CORE.2.P.B	Krt26	0.05	0.497	-0.448
chr11-98748370-98751340	-3.639	0	TAL1.H12CORE.1.P.B_TAL1.H12CORE.1.P.B	Krt26	0.05	0.497	-0.448
chr11-98748370-98751340	-3.639	0	TAL1.H12CORE.1.P.B_TAL1.H12CORE.1.P.B	Krt26	0.05	0.497	-0.448
chr11-98748370-98751340	-3.639	0	TAL1.H12CORE.1.P.B_TAL1.H12CORE.1.P.B	Krt26	0.05	0.497	-0.448
chr11-98748370-98751340	-3.639	0	TAL1.H12CORE.2.P.B_TAL1.H12CORE.2.P.B	Krt26	0.05	0.497	-0.448
chr11-98748370-98751340	-3.639	0	TAL1.H12CORE.2.P.B_TAL1.H12CORE.2.P.B	Krt26	0.05	0.497	-0.448
chr11-98748370-98751340	-3.639	0	TAL1.H12CORE.2.P.B_TAL1.H12CORE.2.P.B	Krt26	0.05	0.497	-0.448
chr11-98748370-98751340	-3.639	0	TAL1.H12CORE.2.P.B_TAL1.H12CORE.2.P.B	Krt26	0.05	0.497	-0.448
chr11-98963137-98964007	-3.246	0.001	TAL1.H12CORE.2.P.B_TAL1.H12CORE.2.P.B	Krt26	0.05	0.497	-0.448
chr11-98963137-98964007	-3.246	0.001	TAL1.H12CORE.2.P.B_TAL1.H12CORE.2.P.B	Krt26	0.05	0.497	-0.448
chr5-33721237-33723915	-2.796	0.003	TAL1.H12CORE.1.P.B_TAL1.H12CORE.1.P.B	Ywhah	1.512	1.947	-0.435
chr5-33721237-33723915	-2.796	0.003	TAL1.H12CORE.1.P.B_TAL1.H12CORE.1.P.B	Ywhah	1.512	1.947	-0.435
chr1-42693073-42693535	2.862	0.002	TAL1.H12CORE.2.P.B_TAL1.H12CORE.2.P.B	Pantr1	2.711	3.14	-0.429
chr1-42693073-42693535	2.862	0.002	TAL1.H12CORE.2.P.B_TAL1.H12CORE.2.P.B	Pantr1	2.711	3.14	-0.429
chr6-72787100-72789767	-2.541	0.006	TAL1.H12CORE.2.P.B_TAL1.H12CORE.2.P.B	Tmsb10	5.277	5.705	-0.427
chr6-72787100-72789767	-2.541	0.006	TAL1.H12CORE.2.P.B_TAL1.H12CORE.2.P.B	Tmsb10	5.277	5.705	-0.427
chr7-126949034-126951149	3.667	0	TAL1.H12CORE.2.P.B_TAL1.H12CORE.2.P.B	Ypel3	1.116	1.538	-0.422
chr7-126949034-126951149	3.667	0	TAL1.H12CORE.2.P.B_TAL1.H12CORE.2.P.B	Ypel3	1.116	1.538	-0.422
chr4-126465616-126466272	-2.432	0.008	TAL1.H12CORE.1.P.B_TAL1.H12CORE.1.P.B	Pou3f1	0.386	0.807	-0.42
chr9-20663561-20664744	3.011	0.001	TAL1.H12CORE.1.P.B_TAL1.H12CORE.1.P.B	Olfm2	0.535	0.94	-0.405
chr9-20663561-20664744	3.011	0.001	TAL1.H12CORE.2.P.B_TAL1.H12CORE.2.P.B	Olfm2	0.535	0.94	-0.405
chr9-20663561-20664744	3.011	0.001	TAL1.H12CORE.1.P.B_TAL1.H12CORE.1.P.B	Olfm2	0.535	0.94	-0.405
chr9-20663561-20664744	3.011	0.001	TAL1.H12CORE.2.P.B_TAL1.H12CORE.2.P.B	Olfm2	0.535	0.94	-0.405
chr9-21243833-21245325	2.775	0.003	TAL1.H12CORE.1.P.B_TAL1.H12CORE.1.P.B	Olfm2	0.535	0.94	-0.405
chr9-21243833-21245325	2.775	0.003	TAL1.H12CORE.1.P.B_TAL1.H12CORE.1.P.B	Olfm2	0.535	0.94	-0.405
chr2-146217143-146217704	2.327	0.01	TAL1.H12CORE.2.P.B_TAL1.H12CORE.2.P.B	Insm1	1.485	1.871	-0.386
chr2-146220647-146223751	4.917	0	TAL1.H12CORE.0.P.B_TAL1.H12CORE.0.P.B	Insm1	1.485	1.871	-0.386
chr14-54430422-54433714	-2.966	0.002	TAL1.H12CORE.0.P.B_TAL1.H12CORE.0.P.B	Rem2	0.449	0.835	-0.386
chr14-54430422-54433714	-2.966	0.002	TAL1.H12CORE.1.P.B_TAL1.H12CORE.1.P.B	Rem2	0.449	0.835	-0.386
chr14-54430422-54433714	-2.966	0.002	TAL1.H12CORE.0.P.B_TAL1.H12CORE.0.P.B	Rem2	0.449	0.835	-0.386
chr14-54430422-54433714	-2.966	0.002	TAL1.H12CORE.1.P.B_TAL1.H12CORE.1.P.B	Rem2	0.449	0.835	-0.386
chr14-55027294-55029653	2.46	0.007	TAL1.H12CORE.1.P.B_TAL1.H12CORE.1.P.B	Rem2	0.449	0.835	-0.386
chr14-55027294-55029653	2.46	0.007	TAL1.H12CORE.1.P.B_TAL1.H12CORE.1.P.B	Rem2	0.449	0.835	-0.386
chr14-55027294-55029653	2.46	0.007	TAL1.H12CORE.1.P.B_TAL1.H12CORE.1.P.B	Rem2	0.449	0.835	-0.386
chr14-55027294-55029653	2.46	0.007	TAL1.H12CORE.1.P.B_TAL1.H12CORE.1.P.B	Rem2	0.449	0.835	-0.386
chr1-134713244-134714452	-2.473	0.007	TAL1.H12CORE.1.P.B_TAL1.H12CORE.1.P.B	Nav1	0.5	0.884	-0.384
chr1-134713244-134714452	-2.473	0.007	TAL1.H12CORE.2.P.B_TAL1.H12CORE.2.P.B	Nav1	0.5	0.884	-0.384
chr1-134713244-134714452	-2.473	0.007	TAL1.H12CORE.1.P.B_TAL1.H12CORE.1.P.B	Nav1	0.5	0.884	-0.384
chr1-134713244-134714452	-2.473	0.007	TAL1.H12CORE.2.P.B_TAL1.H12CORE.2.P.B	Nav1	0.5	0.884	-0.384
chr13-51848591-51849848	4.605	0	TAL1.H12CORE.2.P.B_TAL1.H12CORE.2.P.B	Gadd45g	1.65	2.034	-0.384
chr13-51848591-51849848	4.605	0	TAL1.H12CORE.2.P.B_TAL1.H12CORE.2.P.B	Gadd45g	1.65	2.034	-0.384
chr13-51902007-51903856	4.088	0	TAL1.H12CORE.1.P.B_TAL1.H12CORE.1.P.B	Gadd45g	1.65	2.034	-0.384
chr13-51902007-51903856	4.088	0	TAL1.H12CORE.1.P.B_TAL1.H12CORE.1.P.B	Gadd45g	1.65	2.034	-0.384
chr13-51917632-51919699	4.395	0	TAL1.H12CORE.0.P.B_TAL1.H12CORE.0.P.B	Gadd45g	1.65	2.034	-0.384
chr13-51917632-51919699	4.395	0	TAL1.H12CORE.1.P.B_TAL1.H12CORE.1.P.B	Gadd45g	1.65	2.034	-0.384
chr13-51917632-51919699	4.395	0	TAL1.H12CORE.2.P.B_TAL1.H12CORE.2.P.B	Gadd45g	1.65	2.034	-0.384
chr13-51917632-51919699	4.395	0	TAL1.H12CORE.0.P.B_TAL1.H12CORE.0.P.B	Gadd45g	1.65	2.034	-0.384
chr13-51917632-51919699	4.395	0	TAL1.H12CORE.1.P.B_TAL1.H12CORE.1.P.B	Gadd45g	1.65	2.034	-0.384
chr13-51917632-51919699	4.395	0	TAL1.H12CORE.2.P.B_TAL1.H12CORE.2.P.B	Gadd45g	1.65	2.034	-0.384
chr13-51920192-51921376	3.619	0	TAL1.H12CORE.1.P.B_TAL1.H12CORE.1.P.B	Gadd45g	1.65	2.034	-0.384
chr13-51920192-51921376	3.619	0	TAL1.H12CORE.1.P.B_TAL1.H12CORE.1.P.B	Gadd45g	1.65	2.034	-0.384
chr13-51920192-51921376	3.619	0	TAL1.H12CORE.1.P.B_TAL1.H12CORE.1.P.B	Gadd45g	1.65	2.034	-0.384
chr13-51920192-51921376	3.619	0	TAL1.H12CORE.2.P.B_TAL1.H12CORE.2.P.B	Gadd45g	1.65	2.034	-0.384
chr13-51920192-51921376	3.619	0	TAL1.H12CORE.2.P.B_TAL1.H12CORE.2.P.B	Gadd45g	1.65	2.034	-0.384
chr13-51920192-51921376	3.619	0	TAL1.H12CORE.2.P.B_TAL1.H12CORE.2.P.B	Gadd45g	1.65	2.034	-0.384
chr13-51920192-51921376	3.619	0	TAL1.H12CORE.1.P.B_TAL1.H12CORE.1.P.B	Gadd45g	1.65	2.034	-0.384
chr13-51920192-51921376	3.619	0	TAL1.H12CORE.1.P.B_TAL1.H12CORE.1.P.B	Gadd45g	1.65	2.034	-0.384
chr13-51920192-51921376	3.619	0	TAL1.H12CORE.1.P.B_TAL1.H12CORE.1.P.B	Gadd45g	1.65	2.034	-0.384
chr13-51920192-51921376	3.619	0	TAL1.H12CORE.2.P.B_TAL1.H12CORE.2.P.B	Gadd45g	1.65	2.034	-0.384
chr13-51920192-51921376	3.619	0	TAL1.H12CORE.2.P.B_TAL1.H12CORE.2.P.B	Gadd45g	1.65	2.034	-0.384
chr13-51920192-51921376	3.619	0	TAL1.H12CORE.2.P.B_TAL1.H12CORE.2.P.B	Gadd45g	1.65	2.034	-0.384
chr10-80259789-80261976	-3.14	0.001	TAL1.H12CORE.2.P.B_TAL1.H12CORE.2.P.B	Cirbp	2.259	2.631	-0.372
chr10-80259789-80261976	-3.14	0.001	TAL1.H12CORE.2.P.B_TAL1.H12CORE.2.P.B	Cirbp	2.259	2.631	-0.372
chr3-17793397-17795036	2.46	0.007	TAL1.H12CORE.2.P.B_TAL1.H12CORE.2.P.B	Mir124-2hg	2.286	2.642	-0.356
chr3-17793397-17795036	2.46	0.007	TAL1.H12CORE.2.P.B_TAL1.H12CORE.2.P.B	Mir124-2hg	2.286	2.642	-0.356
chr8-84197174-84198869	-2.855	0.002	TAL1.H12CORE.2.P.B_TAL1.H12CORE.2.P.B	Tecr	1.842	2.196	-0.354
chr8-84197174-84198869	-2.855	0.002	TAL1.H12CORE.2.P.B_TAL1.H12CORE.2.P.B	Tecr	1.842	2.196	-0.354
chr8-84729810-84732148	-2.597	0.005	TAL1.H12CORE.0.P.B_TAL1.H12CORE.0.P.B	Tecr	1.842	2.196	-0.354
chr8-84729810-84732148	-2.597	0.005	TAL1.H12CORE.0.P.B_TAL1.H12CORE.0.P.B	Tecr	1.842	2.196	-0.354
chr8-84729810-84732148	-2.597	0.005	TAL1.H12CORE.0.P.B_TAL1.H12CORE.0.P.B	Tecr	1.842	2.196	-0.354
chr8-84729810-84732148	-2.597	0.005	TAL1.H12CORE.0.P.B_TAL1.H12CORE.0.P.B	Tecr	1.842	2.196	-0.354
chr8-84814016-84815876	-2.464	0.007	TAL1.H12CORE.1.P.B_TAL1.H12CORE.1.P.B	Tecr	1.842	2.196	-0.354
chr8-84814016-84815876	-2.464	0.007	TAL1.H12CORE.1.P.B_TAL1.H12CORE.1.P.B	Tecr	1.842	2.196	-0.354
chr8-84814016-84815876	-2.464	0.007	TAL1.H12CORE.2.P.B_TAL1.H12CORE.2.P.B	Tecr	1.842	2.196	-0.354
chr8-84814016-84815876	-2.464	0.007	TAL1.H12CORE.2.P.B_TAL1.H12CORE.2.P.B	Tecr	1.842	2.196	-0.354
chr8-84814016-84815876	-2.464	0.007	TAL1.H12CORE.1.P.B_TAL1.H12CORE.1.P.B	Tecr	1.842	2.196	-0.354
chr8-84814016-84815876	-2.464	0.007	TAL1.H12CORE.1.P.B_TAL1.H12CORE.1.P.B	Tecr	1.842	2.196	-0.354
chr8-84814016-84815876	-2.464	0.007	TAL1.H12CORE.2.P.B_TAL1.H12CORE.2.P.B	Tecr	1.842	2.196	-0.354
chr8-84814016-84815876	-2.464	0.007	TAL1.H12CORE.2.P.B_TAL1.H12CORE.2.P.B	Tecr	1.842	2.196	-0.354
chr14-64586802-64588425	3.91	0	TAL1.H12CORE.1.P.B_TAL1.H12CORE.1.P.B	Mir124a-1hg	1.088	1.436	-0.348
chr14-64586802-64588425	3.91	0	TAL1.H12CORE.1.P.B_TAL1.H12CORE.1.P.B	Mir124a-1hg	1.088	1.436	-0.348
chr5-111366431-111369286	2.56	0.005	TAL1.H12CORE.0.P.B_TAL1.H12CORE.0.P.B	Mn1	0.898	1.238	-0.34
chr5-111366431-111369286	2.56	0.005	TAL1.H12CORE.2.P.B_TAL1.H12CORE.2.P.B	Mn1	0.898	1.238	-0.34
chr5-111366431-111369286	2.56	0.005	TAL1.H12CORE.0.P.B_TAL1.H12CORE.0.P.B	Mn1	0.898	1.238	-0.34
chr5-111366431-111369286	2.56	0.005	TAL1.H12CORE.2.P.B_TAL1.H12CORE.2.P.B	Mn1	0.898	1.238	-0.34
chr5-111518985-111520272	3.026	0.001	TAL1.H12CORE.0.P.B_TAL1.H12CORE.0.P.B	Mn1	0.898	1.238	-0.34
chr5-111518985-111520272	3.026	0.001	TAL1.H12CORE.0.P.B_TAL1.H12CORE.0.P.B	Mn1	0.898	1.238	-0.34
chr5-111835499-111837427	4.335	0	TAL1.H12CORE.2.P.B_TAL1.H12CORE.2.P.B	Mn1	0.898	1.238	-0.34
chr5-111835499-111837427	4.335	0	TAL1.H12CORE.2.P.B_TAL1.H12CORE.2.P.B	Mn1	0.898	1.238	-0.34
chr18-69591355-69593667	2.775	0.003	TAL1.H12CORE.1.P.B_TAL1.H12CORE.1.P.B	Tcf4	1.067	1.406	-0.339
chr18-69591355-69593667	2.775	0.003	TAL1.H12CORE.2.P.B_TAL1.H12CORE.2.P.B	Tcf4	1.067	1.406	-0.339
chr18-69591355-69593667	2.775	0.003	TAL1.H12CORE.1.P.B_TAL1.H12CORE.1.P.B	Tcf4	1.067	1.406	-0.339
chr18-69591355-69593667	2.775	0.003	TAL1.H12CORE.2.P.B_TAL1.H12CORE.2.P.B	Tcf4	1.067	1.406	-0.339
chr6-29434903-29437082	-2.911	0.002	TAL1.H12CORE.0.P.B_TAL1.H12CORE.0.P.B	Klhdc10	0.456	0.782	-0.326
chr6-29434903-29437082	-2.911	0.002	TAL1.H12CORE.2.P.B_TAL1.H12CORE.2.P.B	Klhdc10	0.456	0.782	-0.326
chr6-29434903-29437082	-2.911	0.002	TAL1.H12CORE.2.P.B_TAL1.H12CORE.2.P.B	Klhdc10	0.456	0.782	-0.326
chr6-29434903-29437082	-2.911	0.002	TAL1.H12CORE.0.P.B_TAL1.H12CORE.0.P.B	Klhdc10	0.456	0.782	-0.326
chr6-29434903-29437082	-2.911	0.002	TAL1.H12CORE.2.P.B_TAL1.H12CORE.2.P.B	Klhdc10	0.456	0.782	-0.326
chr6-29434903-29437082	-2.911	0.002	TAL1.H12CORE.2.P.B_TAL1.H12CORE.2.P.B	Klhdc10	0.456	0.782	-0.326
chr1-172314557-172315270	4.89	0	TAL1.H12CORE.1.P.B_TAL1.H12CORE.1.P.B	Igsf8	0.848	1.173	-0.326
chr1-172314557-172315270	4.89	0	TAL1.H12CORE.1.P.B_TAL1.H12CORE.1.P.B	Igsf8	0.848	1.173	-0.326
chr1-172349389-172350767	3.691	0	TAL1.H12CORE.2.P.B_TAL1.H12CORE.2.P.B	Igsf8	0.848	1.173	-0.326
chr1-172349389-172350767	3.691	0	TAL1.H12CORE.2.P.B_TAL1.H12CORE.2.P.B	Igsf8	0.848	1.173	-0.326
chr11-80315518-80316743	-4.832	0	TAL1.H12CORE.2.P.B_TAL1.H12CORE.2.P.B	Cdk5r1	1.165	1.49	-0.325
chr11-80315518-80316743	-4.832	0	TAL1.H12CORE.2.P.B_TAL1.H12CORE.2.P.B	Cdk5r1	1.165	1.49	-0.325
chr5-76782048-76783456	-2.706	0.003	TAL1.H12CORE.1.P.B_TAL1.H12CORE.1.P.B	Adgrl3	0.45	0.77	-0.32
chr5-76782048-76783456	-2.706	0.003	TAL1.H12CORE.1.P.B_TAL1.H12CORE.1.P.B	Adgrl3	0.45	0.77	-0.32
chr5-76782048-76783456	-2.706	0.003	TAL1.H12CORE.1.P.B_TAL1.H12CORE.1.P.B	Adgrl3	0.45	0.77	-0.32
chr5-76782048-76783456	-2.706	0.003	TAL1.H12CORE.2.P.B_TAL1.H12CORE.2.P.B	Adgrl3	0.45	0.77	-0.32
chr5-76782048-76783456	-2.706	0.003	TAL1.H12CORE.1.P.B_TAL1.H12CORE.1.P.B	Adgrl3	0.45	0.77	-0.32
chr5-76782048-76783456	-2.706	0.003	TAL1.H12CORE.1.P.B_TAL1.H12CORE.1.P.B	Adgrl3	0.45	0.77	-0.32
chr5-76782048-76783456	-2.706	0.003	TAL1.H12CORE.1.P.B_TAL1.H12CORE.1.P.B	Adgrl3	0.45	0.77	-0.32
chr5-76782048-76783456	-2.706	0.003	TAL1.H12CORE.2.P.B_TAL1.H12CORE.2.P.B	Adgrl3	0.45	0.77	-0.32
chr5-85238690-85240775	-4.389	0	TAL1.H12CORE.1.P.B_TAL1.H12CORE.1.P.B	Adgrl3	0.45	0.77	-0.32
chr5-85238690-85240775	-4.389	0	TAL1.H12CORE.2.P.B_TAL1.H12CORE.2.P.B	Adgrl3	0.45	0.77	-0.32
chr5-85238690-85240775	-4.389	0	TAL1.H12CORE.2.P.B_TAL1.H12CORE.2.P.B	Adgrl3	0.45	0.77	-0.32
chr5-85238690-85240775	-4.389	0	TAL1.H12CORE.1.P.B_TAL1.H12CORE.1.P.B	Adgrl3	0.45	0.77	-0.32
chr5-85238690-85240775	-4.389	0	TAL1.H12CORE.2.P.B_TAL1.H12CORE.2.P.B	Adgrl3	0.45	0.77	-0.32
chr5-85238690-85240775	-4.389	0	TAL1.H12CORE.2.P.B_TAL1.H12CORE.2.P.B	Adgrl3	0.45	0.77	-0.32
chr11-98327013-98330272	2.379	0.009	TAL1.H12CORE.1.P.B_TAL1.H12CORE.1.P.B	Neurod2	0.039	0.358	-0.319
chr11-98327013-98330272	2.379	0.009	TAL1.H12CORE.1.P.B_TAL1.H12CORE.1.P.B	Neurod2	0.039	0.358	-0.319
chr11-98327013-98330272	2.379	0.009	TAL1.H12CORE.1.P.B_TAL1.H12CORE.1.P.B	Neurod2	0.039	0.358	-0.319
chr11-98327013-98330272	2.379	0.009	TAL1.H12CORE.1.P.B_TAL1.H12CORE.1.P.B	Neurod2	0.039	0.358	-0.319
chr11-98327013-98330272	2.379	0.009	TAL1.H12CORE.1.P.B_TAL1.H12CORE.1.P.B	Neurod2	0.039	0.358	-0.319
chr11-98327013-98330272	2.379	0.009	TAL1.H12CORE.1.P.B_TAL1.H12CORE.1.P.B	Neurod2	0.039	0.358	-0.319
chr11-98333994-98334748	3.19	0.001	TAL1.H12CORE.2.P.B_TAL1.H12CORE.2.P.B	Neurod2	0.039	0.358	-0.319
chr11-98333994-98334748	3.19	0.001	TAL1.H12CORE.2.P.B_TAL1.H12CORE.2.P.B	Neurod2	0.039	0.358	-0.319
chr19-5740703-5742696	-2.969	0.001	TAL1.H12CORE.2.P.B_TAL1.H12CORE.2.P.B	Malat1	7.443	7.751	-0.308
chr19-5740703-5742696	-2.969	0.001	TAL1.H12CORE.2.P.B_TAL1.H12CORE.2.P.B	Malat1	7.443	7.751	-0.308
chr11-77893565-77894741	-3	0.001	TAL1.H12CORE.1.P.B_TAL1.H12CORE.1.P.B	Sez6	0.405	0.712	-0.307
chr11-77893565-77894741	-3	0.001	TAL1.H12CORE.1.P.B_TAL1.H12CORE.1.P.B	Sez6	0.405	0.712	-0.307
chr11-77964537-77966174	-2.477	0.007	TAL1.H12CORE.1.P.B_TAL1.H12CORE.1.P.B	Sez6	0.405	0.712	-0.307
chr11-77964537-77966174	-2.477	0.007	TAL1.H12CORE.1.P.B_TAL1.H12CORE.1.P.B	Sez6	0.405	0.712	-0.307
chr11-78177570-78179366	-2.43	0.008	TAL1.H12CORE.1.P.B_TAL1.H12CORE.1.P.B	Sez6	0.405	0.712	-0.307
chr11-78177570-78179366	-2.43	0.008	TAL1.H12CORE.1.P.B_TAL1.H12CORE.1.P.B	Sez6	0.405	0.712	-0.307
chr11-72488281-72490337	2.475	0.007	TAL1.H12CORE.2.P.B_TAL1.H12CORE.2.P.B	Tax1bp3	0.742	1.045	-0.303
chr11-72488281-72490337	2.475	0.007	TAL1.H12CORE.2.P.B_TAL1.H12CORE.2.P.B	Tax1bp3	0.742	1.045	-0.303
chr11-72488281-72490337	2.475	0.007	TAL1.H12CORE.2.P.B_TAL1.H12CORE.2.P.B	Tax1bp3	0.742	1.045	-0.303
chr11-72488281-72490337	2.475	0.007	TAL1.H12CORE.2.P.B_TAL1.H12CORE.2.P.B	Tax1bp3	0.742	1.045	-0.303
chr17-83953481-83955185	2.689	0.004	TAL1.H12CORE.2.P.B_TAL1.H12CORE.2.P.B	Pkdcc	0.197	0.498	-0.3
chr17-83953481-83955185	2.689	0.004	TAL1.H12CORE.2.P.B_TAL1.H12CORE.2.P.B	Pkdcc	0.197	0.498	-0.3
chr11-120261084-120262893	-3.591	0	TAL1.H12CORE.2.P.B_TAL1.H12CORE.2.P.B	Nptx1	0.005	0.305	-0.299
chr11-120261084-120262893	-3.591	0	TAL1.H12CORE.2.P.B_TAL1.H12CORE.2.P.B	Nptx1	0.005	0.305	-0.299
chr5-33721237-33723915	-2.803	0.003	TAL1.H12CORE.1.P.B_TAL1.H12CORE.1.P.B	Gm1673	2.906	3.204	-0.298
chr5-33721237-33723915	-2.803	0.003	TAL1.H12CORE.1.P.B_TAL1.H12CORE.1.P.B	Gm1673	2.906	3.204	-0.298
chr8-70656073-70657064	-3.6	0	TAL1.H12CORE.1.P.B_TAL1.H12CORE.1.P.B	Ssbp4	0.886	1.182	-0.296
chr8-70656073-70657064	-3.6	0	TAL1.H12CORE.1.P.B_TAL1.H12CORE.1.P.B	Ssbp4	0.886	1.182	-0.296
chr11-69364428-69365368	-2.429	0.008	TAL1.H12CORE.1.P.B_TAL1.H12CORE.1.P.B	Chd3	1.174	1.465	-0.291
chr11-69364428-69365368	-2.429	0.008	TAL1.H12CORE.2.P.B_TAL1.H12CORE.2.P.B	Chd3	1.174	1.465	-0.291
chr11-69364428-69365368	-2.429	0.008	TAL1.H12CORE.1.P.B_TAL1.H12CORE.1.P.B	Chd3	1.174	1.465	-0.291
chr11-69364428-69365368	-2.429	0.008	TAL1.H12CORE.2.P.B_TAL1.H12CORE.2.P.B	Chd3	1.174	1.465	-0.291
chr13-55470173-55470693	-2.347	0.009	TAL1.H12CORE.2.P.B_TAL1.H12CORE.2.P.B	Pdlim7	0.67	0.955	-0.285
chr13-55470173-55470693	-2.347	0.009	TAL1.H12CORE.2.P.B_TAL1.H12CORE.2.P.B	Pdlim7	0.67	0.955	-0.285
chr13-55471035-55473002	2.624	0.004	TAL1.H12CORE.1.P.B_TAL1.H12CORE.1.P.B	Pdlim7	0.67	0.955	-0.285
chr13-55471035-55473002	2.624	0.004	TAL1.H12CORE.1.P.B_TAL1.H12CORE.1.P.B	Pdlim7	0.67	0.955	-0.285
chr13-55510449-55511476	-2.331	0.01	TAL1.H12CORE.2.P.B_TAL1.H12CORE.2.P.B	Pdlim7	0.67	0.955	-0.285
chr13-55510449-55511476	-2.331	0.01	TAL1.H12CORE.2.P.B_TAL1.H12CORE.2.P.B	Pdlim7	0.67	0.955	-0.285
chr2-180890250-180891665	2.433	0.007	TAL1.H12CORE.2.P.B_TAL1.H12CORE.2.P.B	Eef1a2	0.086	0.366	-0.28
chr2-180890250-180891665	2.433	0.007	TAL1.H12CORE.2.P.B_TAL1.H12CORE.2.P.B	Eef1a2	0.086	0.366	-0.28
chr1-134713244-134714452	2.616	0.004	TAL1.H12CORE.1.P.B_TAL1.H12CORE.1.P.B	Csrp1	0.029	0.307	-0.278
chr1-134713244-134714452	2.616	0.004	TAL1.H12CORE.2.P.B_TAL1.H12CORE.2.P.B	Csrp1	0.029	0.307	-0.278
chr1-134713244-134714452	2.616	0.004	TAL1.H12CORE.1.P.B_TAL1.H12CORE.1.P.B	Csrp1	0.029	0.307	-0.278
chr1-134713244-134714452	2.616	0.004	TAL1.H12CORE.2.P.B_TAL1.H12CORE.2.P.B	Csrp1	0.029	0.307	-0.278
chr9-106456480-106457104	-2.954	0.002	TAL1.H12CORE.1.P.B_TAL1.H12CORE.1.P.B	Cacna2d2	0.279	0.554	-0.275
chr9-106456480-106457104	-2.954	0.002	TAL1.H12CORE.2.P.B_TAL1.H12CORE.2.P.B	Cacna2d2	0.279	0.554	-0.275
chr9-106456480-106457104	-2.954	0.002	TAL1.H12CORE.2.P.B_TAL1.H12CORE.2.P.B	Cacna2d2	0.279	0.554	-0.275
chr9-106456480-106457104	-2.954	0.002	TAL1.H12CORE.1.P.B_TAL1.H12CORE.1.P.B	Cacna2d2	0.279	0.554	-0.275
chr9-106456480-106457104	-2.954	0.002	TAL1.H12CORE.2.P.B_TAL1.H12CORE.2.P.B	Cacna2d2	0.279	0.554	-0.275
chr9-106456480-106457104	-2.954	0.002	TAL1.H12CORE.2.P.B_TAL1.H12CORE.2.P.B	Cacna2d2	0.279	0.554	-0.275
chr9-107512052-107512833	3.12	0.001	TAL1.H12CORE.1.P.B_TAL1.H12CORE.1.P.B	Cacna2d2	0.279	0.554	-0.275
chr9-107512052-107512833	3.12	0.001	TAL1.H12CORE.2.P.B_TAL1.H12CORE.2.P.B	Cacna2d2	0.279	0.554	-0.275
chr9-107512052-107512833	3.12	0.001	TAL1.H12CORE.1.P.B_TAL1.H12CORE.1.P.B	Cacna2d2	0.279	0.554	-0.275
chr9-107512052-107512833	3.12	0.001	TAL1.H12CORE.2.P.B_TAL1.H12CORE.2.P.B	Cacna2d2	0.279	0.554	-0.275
chr8-122719602-122721611	2.977	0.001	TAL1.H12CORE.0.P.B_TAL1.H12CORE.0.P.B	Trappc2l	1.27	1.542	-0.272
chr8-122719602-122721611	2.977	0.001	TAL1.H12CORE.0.P.B_TAL1.H12CORE.0.P.B	Trappc2l	1.27	1.542	-0.272
chr8-122719602-122721611	2.977	0.001	TAL1.H12CORE.0.P.B_TAL1.H12CORE.0.P.B	Trappc2l	1.27	1.542	-0.272
chr8-122719602-122721611	2.977	0.001	TAL1.H12CORE.0.P.B_TAL1.H12CORE.0.P.B	Trappc2l	1.27	1.542	-0.272
chr13-55470173-55470693	-2.363	0.009	TAL1.H12CORE.2.P.B_TAL1.H12CORE.2.P.B	Prr7	0.451	0.719	-0.268
chr13-55470173-55470693	-2.363	0.009	TAL1.H12CORE.2.P.B_TAL1.H12CORE.2.P.B	Prr7	0.451	0.719	-0.268
chr13-55510449-55511476	-2.387	0.008	TAL1.H12CORE.2.P.B_TAL1.H12CORE.2.P.B	Prr7	0.451	0.719	-0.268
chr13-55510449-55511476	-2.387	0.008	TAL1.H12CORE.2.P.B_TAL1.H12CORE.2.P.B	Prr7	0.451	0.719	-0.268
chr4-120171655-120172642	-2.849	0.002	TAL1.H12CORE.2.P.B_TAL1.H12CORE.2.P.B	Scmh1	0.254	0.522	-0.268
chr4-120171655-120172642	-2.849	0.002	TAL1.H12CORE.2.P.B_TAL1.H12CORE.2.P.B	Scmh1	0.254	0.522	-0.268
chr4-120242313-120243455	-3.121	0.001	TAL1.H12CORE.1.P.B_TAL1.H12CORE.1.P.B	Scmh1	0.254	0.522	-0.268
chr4-120242313-120243455	-3.121	0.001	TAL1.H12CORE.2.P.B_TAL1.H12CORE.2.P.B	Scmh1	0.254	0.522	-0.268
chr4-120242313-120243455	-3.121	0.001	TAL1.H12CORE.1.P.B_TAL1.H12CORE.1.P.B	Scmh1	0.254	0.522	-0.268
chr4-120242313-120243455	-3.121	0.001	TAL1.H12CORE.2.P.B_TAL1.H12CORE.2.P.B	Scmh1	0.254	0.522	-0.268
chr13-54371022-54373121	2.465	0.007	TAL1.H12CORE.2.P.B_TAL1.H12CORE.2.P.B	Cplx2	0.441	0.707	-0.266
chr13-54371022-54373121	2.465	0.007	TAL1.H12CORE.2.P.B_TAL1.H12CORE.2.P.B	Cplx2	0.441	0.707	-0.266
chr2-31636217-31637206	-3.168	0.001	TAL1.H12CORE.1.P.B_TAL1.H12CORE.1.P.B	Sh2d3c	0.424	0.688	-0.264
chr2-31636217-31637206	-3.168	0.001	TAL1.H12CORE.1.P.B_TAL1.H12CORE.1.P.B	Sh2d3c	0.424	0.688	-0.264
chr2-32740700-32742637	2.747	0.003	TAL1.H12CORE.1.P.B_TAL1.H12CORE.1.P.B	Sh2d3c	0.424	0.688	-0.264
chr2-32740700-32742637	2.747	0.003	TAL1.H12CORE.1.P.B_TAL1.H12CORE.1.P.B	Sh2d3c	0.424	0.688	-0.264
chr5-85238690-85240775	-3.84	0	TAL1.H12CORE.1.P.B_TAL1.H12CORE.1.P.B	Epha5	2.614	2.874	-0.26
chr5-85238690-85240775	-3.84	0	TAL1.H12CORE.2.P.B_TAL1.H12CORE.2.P.B	Epha5	2.614	2.874	-0.26
chr5-85238690-85240775	-3.84	0	TAL1.H12CORE.2.P.B_TAL1.H12CORE.2.P.B	Epha5	2.614	2.874	-0.26
chr5-85238690-85240775	-3.84	0	TAL1.H12CORE.1.P.B_TAL1.H12CORE.1.P.B	Epha5	2.614	2.874	-0.26
chr5-85238690-85240775	-3.84	0	TAL1.H12CORE.2.P.B_TAL1.H12CORE.2.P.B	Epha5	2.614	2.874	-0.26
chr5-85238690-85240775	-3.84	0	TAL1.H12CORE.2.P.B_TAL1.H12CORE.2.P.B	Epha5	2.614	2.874	-0.26
chr8-94871967-94872565	2.562	0.005	TAL1.H12CORE.1.P.B_TAL1.H12CORE.1.P.B	Herpud1	0.63	0.885	-0.255
chr8-94871967-94872565	2.562	0.005	TAL1.H12CORE.2.P.B_TAL1.H12CORE.2.P.B	Herpud1	0.63	0.885	-0.255
chr8-94871967-94872565	2.562	0.005	TAL1.H12CORE.1.P.B_TAL1.H12CORE.1.P.B	Herpud1	0.63	0.885	-0.255
chr8-94871967-94872565	2.562	0.005	TAL1.H12CORE.2.P.B_TAL1.H12CORE.2.P.B	Herpud1	0.63	0.885	-0.255
chr6-5379332-5381202	3.427	0	TAL1.H12CORE.1.P.B_TAL1.H12CORE.1.P.B	Peg10	0.112	0.364	-0.252
chr6-5379332-5381202	3.427	0	TAL1.H12CORE.2.P.B_TAL1.H12CORE.2.P.B	Peg10	0.112	0.364	-0.252
chr6-5379332-5381202	3.427	0	TAL1.H12CORE.2.P.B_TAL1.H12CORE.2.P.B	Peg10	0.112	0.364	-0.252
chr6-5379332-5381202	3.427	0	TAL1.H12CORE.2.P.B_TAL1.H12CORE.2.P.B	Peg10	0.112	0.364	-0.252
chr6-5379332-5381202	3.427	0	TAL1.H12CORE.1.P.B_TAL1.H12CORE.1.P.B	Peg10	0.112	0.364	-0.252
chr6-5379332-5381202	3.427	0	TAL1.H12CORE.2.P.B_TAL1.H12CORE.2.P.B	Peg10	0.112	0.364	-0.252
chr6-5379332-5381202	3.427	0	TAL1.H12CORE.2.P.B_TAL1.H12CORE.2.P.B	Peg10	0.112	0.364	-0.252
chr6-5379332-5381202	3.427	0	TAL1.H12CORE.2.P.B_TAL1.H12CORE.2.P.B	Peg10	0.112	0.364	-0.252
chr11-116332209-116332940	-3.139	0.001	TAL1.H12CORE.1.P.B_TAL1.H12CORE.1.P.B	H3f3b	5.311	5.562	-0.251
chr11-116332209-116332940	-3.139	0.001	TAL1.H12CORE.1.P.B_TAL1.H12CORE.1.P.B	H3f3b	5.311	5.562	-0.251
chr10-80259789-80261976	-3.012	0.001	TAL1.H12CORE.2.P.B_TAL1.H12CORE.2.P.B	Celf5	0.748	0.998	-0.25
chr10-80259789-80261976	-3.012	0.001	TAL1.H12CORE.2.P.B_TAL1.H12CORE.2.P.B	Celf5	0.748	0.998	-0.25
chr10-80259789-80261976	-2.688	0.004	TAL1.H12CORE.2.P.B_TAL1.H12CORE.2.P.B	Palm	0.987	1.236	-0.249
chr10-80259789-80261976	-2.688	0.004	TAL1.H12CORE.2.P.B_TAL1.H12CORE.2.P.B	Palm	0.987	1.236	-0.249
chr10-81481410-81482905	2.328	0.01	TAL1.H12CORE.2.P.B_TAL1.H12CORE.2.P.B	Palm	0.987	1.236	-0.249
chr10-81481410-81482905	2.328	0.01	TAL1.H12CORE.2.P.B_TAL1.H12CORE.2.P.B	Palm	0.987	1.236	-0.249
chr2-157339513-157340802	-3.135	0.001	TAL1.H12CORE.0.P.B_TAL1.H12CORE.0.P.B	Nnat	4.505	4.754	-0.249
chr2-157339513-157340802	-3.135	0.001	TAL1.H12CORE.0.P.B_TAL1.H12CORE.0.P.B	Nnat	4.505	4.754	-0.249
chr9-102689148-102691311	2.514	0.006	TAL1.H12CORE.1.P.B_TAL1.H12CORE.1.P.B	Amotl2	0.472	0.718	-0.246
chr9-102689148-102691311	2.514	0.006	TAL1.H12CORE.2.P.B_TAL1.H12CORE.2.P.B	Amotl2	0.472	0.718	-0.246
chr9-102689148-102691311	2.514	0.006	TAL1.H12CORE.1.P.B_TAL1.H12CORE.1.P.B	Amotl2	0.472	0.718	-0.246
chr9-102689148-102691311	2.514	0.006	TAL1.H12CORE.2.P.B_TAL1.H12CORE.2.P.B	Amotl2	0.472	0.718	-0.246
chr9-102723434-102724463	5.588	0	TAL1.H12CORE.1.P.B_TAL1.H12CORE.1.P.B	Amotl2	0.472	0.718	-0.246
chr9-102723434-102724463	5.588	0	TAL1.H12CORE.1.P.B_TAL1.H12CORE.1.P.B	Amotl2	0.472	0.718	-0.246
chr7-109190630-109192251	-3.531	0	TAL1.H12CORE.1.P.B_TAL1.H12CORE.1.P.B	Apbb1	0.736	0.981	-0.245
chr7-109190630-109192251	-3.531	0	TAL1.H12CORE.2.P.B_TAL1.H12CORE.2.P.B	Apbb1	0.736	0.981	-0.245
chr7-109190630-109192251	-3.531	0	TAL1.H12CORE.1.P.B_TAL1.H12CORE.1.P.B	Apbb1	0.736	0.981	-0.245
chr7-109190630-109192251	-3.531	0	TAL1.H12CORE.2.P.B_TAL1.H12CORE.2.P.B	Apbb1	0.736	0.981	-0.245
chr2-157339513-157340802	-2.76	0.003	TAL1.H12CORE.0.P.B_TAL1.H12CORE.0.P.B	Blcap	0.724	0.969	-0.245
chr2-157339513-157340802	-2.76	0.003	TAL1.H12CORE.0.P.B_TAL1.H12CORE.0.P.B	Blcap	0.724	0.969	-0.245
chr7-25007588-25009656	3.967	0	TAL1.H12CORE.1.P.B_TAL1.H12CORE.1.P.B	Pou2f2	0.508	0.751	-0.242
chr7-25007588-25009656	3.967	0	TAL1.H12CORE.1.P.B_TAL1.H12CORE.1.P.B	Pou2f2	0.508	0.751	-0.242
chr7-25007588-25009656	3.967	0	TAL1.H12CORE.2.P.B_TAL1.H12CORE.2.P.B	Pou2f2	0.508	0.751	-0.242
chr7-25007588-25009656	3.967	0	TAL1.H12CORE.2.P.B_TAL1.H12CORE.2.P.B	Pou2f2	0.508	0.751	-0.242
chr7-25007588-25009656	3.967	0	TAL1.H12CORE.1.P.B_TAL1.H12CORE.1.P.B	Pou2f2	0.508	0.751	-0.242
chr7-25007588-25009656	3.967	0	TAL1.H12CORE.1.P.B_TAL1.H12CORE.1.P.B	Pou2f2	0.508	0.751	-0.242
chr7-25007588-25009656	3.967	0	TAL1.H12CORE.2.P.B_TAL1.H12CORE.2.P.B	Pou2f2	0.508	0.751	-0.242
chr7-25007588-25009656	3.967	0	TAL1.H12CORE.2.P.B_TAL1.H12CORE.2.P.B	Pou2f2	0.508	0.751	-0.242
chr7-25153348-25154327	2.489	0.006	TAL1.H12CORE.1.P.B_TAL1.H12CORE.1.P.B	Pou2f2	0.508	0.751	-0.242
chr7-25153348-25154327	2.489	0.006	TAL1.H12CORE.1.P.B_TAL1.H12CORE.1.P.B	Pou2f2	0.508	0.751	-0.242
chr6-88189264-88191083	-2.719	0.003	TAL1.H12CORE.0.P.B_TAL1.H12CORE.0.P.B	Nfu1	0.646	0.888	-0.242
chr6-88189264-88191083	-2.719	0.003	TAL1.H12CORE.0.P.B_TAL1.H12CORE.0.P.B	Nfu1	0.646	0.888	-0.242
chr6-88189264-88191083	-2.719	0.003	TAL1.H12CORE.0.P.B_TAL1.H12CORE.0.P.B	Nfu1	0.646	0.888	-0.242
chr6-88189264-88191083	-2.719	0.003	TAL1.H12CORE.0.P.B_TAL1.H12CORE.0.P.B	Nfu1	0.646	0.888	-0.242
chr6-88189264-88191083	-2.719	0.003	TAL1.H12CORE.0.P.B_TAL1.H12CORE.0.P.B	Nfu1	0.646	0.888	-0.242
chr6-88189264-88191083	-2.719	0.003	TAL1.H12CORE.0.P.B_TAL1.H12CORE.0.P.B	Nfu1	0.646	0.888	-0.242
chr6-88189264-88191083	-2.719	0.003	TAL1.H12CORE.0.P.B_TAL1.H12CORE.0.P.B	Nfu1	0.646	0.888	-0.242
chr6-88189264-88191083	-2.719	0.003	TAL1.H12CORE.0.P.B_TAL1.H12CORE.0.P.B	Nfu1	0.646	0.888	-0.242
chr11-69364428-69365368	-2.388	0.008	TAL1.H12CORE.1.P.B_TAL1.H12CORE.1.P.B	Chd3os	0.552	0.786	-0.234
chr11-69364428-69365368	-2.388	0.008	TAL1.H12CORE.2.P.B_TAL1.H12CORE.2.P.B	Chd3os	0.552	0.786	-0.234
chr11-69364428-69365368	-2.388	0.008	TAL1.H12CORE.1.P.B_TAL1.H12CORE.1.P.B	Chd3os	0.552	0.786	-0.234
chr11-69364428-69365368	-2.388	0.008	TAL1.H12CORE.2.P.B_TAL1.H12CORE.2.P.B	Chd3os	0.552	0.786	-0.234
chr11-69935164-69936259	2.597	0.005	TAL1.H12CORE.2.P.B_TAL1.H12CORE.2.P.B	Chd3os	0.552	0.786	-0.234
chr11-69935164-69936259	2.597	0.005	TAL1.H12CORE.2.P.B_TAL1.H12CORE.2.P.B	Chd3os	0.552	0.786	-0.234
chr11-69935164-69936259	2.597	0.005	TAL1.H12CORE.2.P.B_TAL1.H12CORE.2.P.B	Chd3os	0.552	0.786	-0.234
chr11-69935164-69936259	2.597	0.005	TAL1.H12CORE.2.P.B_TAL1.H12CORE.2.P.B	Chd3os	0.552	0.786	-0.234
chr15-98001077-98005045	-2.406	0.008	TAL1.H12CORE.1.P.B_TAL1.H12CORE.1.P.B	Cacnb3	0.538	0.767	-0.229
chr15-98001077-98005045	-2.406	0.008	TAL1.H12CORE.1.P.B_TAL1.H12CORE.1.P.B	Cacnb3	0.538	0.767	-0.229
chr15-99094539-99095027	-2.69	0.004	TAL1.H12CORE.1.P.B_TAL1.H12CORE.1.P.B	Cacnb3	0.538	0.767	-0.229
chr15-99094539-99095027	-2.69	0.004	TAL1.H12CORE.1.P.B_TAL1.H12CORE.1.P.B	Cacnb3	0.538	0.767	-0.229
chr13-55510449-55511476	-2.526	0.006	TAL1.H12CORE.2.P.B_TAL1.H12CORE.2.P.B	Dbn1	1.823	2.049	-0.226
chr13-55510449-55511476	-2.526	0.006	TAL1.H12CORE.2.P.B_TAL1.H12CORE.2.P.B	Dbn1	1.823	2.049	-0.226
chr7-126949034-126951149	3.945	0	TAL1.H12CORE.2.P.B_TAL1.H12CORE.2.P.B	Fam57b	0.612	0.835	-0.222
chr7-126949034-126951149	3.945	0	TAL1.H12CORE.2.P.B_TAL1.H12CORE.2.P.B	Fam57b	0.612	0.835	-0.222
chr11-98963137-98964007	2.795	0.003	TAL1.H12CORE.2.P.B_TAL1.H12CORE.2.P.B	Igfbp4	0.277	0.499	-0.222
chr11-98963137-98964007	2.795	0.003	TAL1.H12CORE.2.P.B_TAL1.H12CORE.2.P.B	Igfbp4	0.277	0.499	-0.222
chr11-100319250-100320649	-2.547	0.005	TAL1.H12CORE.1.P.B_TAL1.H12CORE.1.P.B	Igfbp4	0.277	0.499	-0.222
chr11-100319250-100320649	-2.547	0.005	TAL1.H12CORE.2.P.B_TAL1.H12CORE.2.P.B	Igfbp4	0.277	0.499	-0.222
chr11-100319250-100320649	-2.547	0.005	TAL1.H12CORE.1.P.B_TAL1.H12CORE.1.P.B	Igfbp4	0.277	0.499	-0.222
chr11-100319250-100320649	-2.547	0.005	TAL1.H12CORE.2.P.B_TAL1.H12CORE.2.P.B	Igfbp4	0.277	0.499	-0.222
chr13-83720827-83722546	4.48	0	TAL1.H12CORE.1.P.B_TAL1.H12CORE.1.P.B	C130071C03Rik	1.036	1.258	-0.222
chr13-83720827-83722546	4.48	0	TAL1.H12CORE.1.P.B_TAL1.H12CORE.1.P.B	C130071C03Rik	1.036	1.258	-0.222
chr13-83720827-83722546	4.48	0	TAL1.H12CORE.2.P.B_TAL1.H12CORE.2.P.B	C130071C03Rik	1.036	1.258	-0.222
chr13-83720827-83722546	4.48	0	TAL1.H12CORE.1.P.B_TAL1.H12CORE.1.P.B	C130071C03Rik	1.036	1.258	-0.222
chr13-83720827-83722546	4.48	0	TAL1.H12CORE.1.P.B_TAL1.H12CORE.1.P.B	C130071C03Rik	1.036	1.258	-0.222
chr13-83720827-83722546	4.48	0	TAL1.H12CORE.2.P.B_TAL1.H12CORE.2.P.B	C130071C03Rik	1.036	1.258	-0.222
chr13-83739284-83740069	4.051	0	TAL1.H12CORE.1.P.B_TAL1.H12CORE.1.P.B	C130071C03Rik	1.036	1.258	-0.222
chr13-83739284-83740069	4.051	0	TAL1.H12CORE.2.P.B_TAL1.H12CORE.2.P.B	C130071C03Rik	1.036	1.258	-0.222
chr13-83739284-83740069	4.051	0	TAL1.H12CORE.2.P.B_TAL1.H12CORE.2.P.B	C130071C03Rik	1.036	1.258	-0.222
chr13-83739284-83740069	4.051	0	TAL1.H12CORE.1.P.B_TAL1.H12CORE.1.P.B	C130071C03Rik	1.036	1.258	-0.222
chr13-83739284-83740069	4.051	0	TAL1.H12CORE.2.P.B_TAL1.H12CORE.2.P.B	C130071C03Rik	1.036	1.258	-0.222
chr13-83739284-83740069	4.051	0	TAL1.H12CORE.2.P.B_TAL1.H12CORE.2.P.B	C130071C03Rik	1.036	1.258	-0.222
chr13-84058831-84060292	4.754	0	TAL1.H12CORE.0.P.B_TAL1.H12CORE.0.P.B	C130071C03Rik	1.036	1.258	-0.222
chr13-84058831-84060292	4.754	0	TAL1.H12CORE.1.P.B_TAL1.H12CORE.1.P.B	C130071C03Rik	1.036	1.258	-0.222
chr13-84058831-84060292	4.754	0	TAL1.H12CORE.0.P.B_TAL1.H12CORE.0.P.B	C130071C03Rik	1.036	1.258	-0.222
chr13-84058831-84060292	4.754	0	TAL1.H12CORE.1.P.B_TAL1.H12CORE.1.P.B	C130071C03Rik	1.036	1.258	-0.222
chr13-84347089-84348834	2.815	0.002	TAL1.H12CORE.2.P.B_TAL1.H12CORE.2.P.B	C130071C03Rik	1.036	1.258	-0.222
chr13-84347089-84348834	2.815	0.002	TAL1.H12CORE.2.P.B_TAL1.H12CORE.2.P.B	C130071C03Rik	1.036	1.258	-0.222
chr13-84565249-84566694	4.935	0	TAL1.H12CORE.0.P.B_TAL1.H12CORE.0.P.B	C130071C03Rik	1.036	1.258	-0.222
chr13-84565249-84566694	4.935	0	TAL1.H12CORE.1.P.B_TAL1.H12CORE.1.P.B	C130071C03Rik	1.036	1.258	-0.222
chr13-84565249-84566694	4.935	0	TAL1.H12CORE.1.P.B_TAL1.H12CORE.1.P.B	C130071C03Rik	1.036	1.258	-0.222
chr13-84565249-84566694	4.935	0	TAL1.H12CORE.1.P.B_TAL1.H12CORE.1.P.B	C130071C03Rik	1.036	1.258	-0.222
chr13-84565249-84566694	4.935	0	TAL1.H12CORE.1.P.B_TAL1.H12CORE.1.P.B	C130071C03Rik	1.036	1.258	-0.222
chr13-84565249-84566694	4.935	0	TAL1.H12CORE.2.P.B_TAL1.H12CORE.2.P.B	C130071C03Rik	1.036	1.258	-0.222
chr13-84565249-84566694	4.935	0	TAL1.H12CORE.2.P.B_TAL1.H12CORE.2.P.B	C130071C03Rik	1.036	1.258	-0.222
chr13-84565249-84566694	4.935	0	TAL1.H12CORE.0.P.B_TAL1.H12CORE.0.P.B	C130071C03Rik	1.036	1.258	-0.222
chr13-84565249-84566694	4.935	0	TAL1.H12CORE.1.P.B_TAL1.H12CORE.1.P.B	C130071C03Rik	1.036	1.258	-0.222
chr13-84565249-84566694	4.935	0	TAL1.H12CORE.1.P.B_TAL1.H12CORE.1.P.B	C130071C03Rik	1.036	1.258	-0.222
chr13-84565249-84566694	4.935	0	TAL1.H12CORE.1.P.B_TAL1.H12CORE.1.P.B	C130071C03Rik	1.036	1.258	-0.222
chr13-84565249-84566694	4.935	0	TAL1.H12CORE.1.P.B_TAL1.H12CORE.1.P.B	C130071C03Rik	1.036	1.258	-0.222
chr13-84565249-84566694	4.935	0	TAL1.H12CORE.2.P.B_TAL1.H12CORE.2.P.B	C130071C03Rik	1.036	1.258	-0.222
chr13-84565249-84566694	4.935	0	TAL1.H12CORE.2.P.B_TAL1.H12CORE.2.P.B	C130071C03Rik	1.036	1.258	-0.222
chr13-84570705-84572145	4.736	0	TAL1.H12CORE.0.P.B_TAL1.H12CORE.0.P.B	C130071C03Rik	1.036	1.258	-0.222
chr13-84570705-84572145	4.736	0	TAL1.H12CORE.0.P.B_TAL1.H12CORE.0.P.B	C130071C03Rik	1.036	1.258	-0.222
chr1-134062123-134064029	-2.471	0.007	TAL1.H12CORE.1.P.B_TAL1.H12CORE.1.P.B	Shisa4	0.317	0.538	-0.221
chr1-134062123-134064029	-2.471	0.007	TAL1.H12CORE.2.P.B_TAL1.H12CORE.2.P.B	Shisa4	0.317	0.538	-0.221
chr1-134062123-134064029	-2.471	0.007	TAL1.H12CORE.1.P.B_TAL1.H12CORE.1.P.B	Shisa4	0.317	0.538	-0.221
chr1-134062123-134064029	-2.471	0.007	TAL1.H12CORE.2.P.B_TAL1.H12CORE.2.P.B	Shisa4	0.317	0.538	-0.221
chr1-134713244-134714452	-2.407	0.008	TAL1.H12CORE.1.P.B_TAL1.H12CORE.1.P.B	Shisa4	0.317	0.538	-0.221
chr1-134713244-134714452	-2.407	0.008	TAL1.H12CORE.2.P.B_TAL1.H12CORE.2.P.B	Shisa4	0.317	0.538	-0.221
chr1-134713244-134714452	-2.407	0.008	TAL1.H12CORE.1.P.B_TAL1.H12CORE.1.P.B	Shisa4	0.317	0.538	-0.221
chr1-134713244-134714452	-2.407	0.008	TAL1.H12CORE.2.P.B_TAL1.H12CORE.2.P.B	Shisa4	0.317	0.538	-0.221
chr4-133970004-133970654	2.478	0.007	TAL1.H12CORE.1.P.B_TAL1.H12CORE.1.P.B	Hmgn2	1.522	1.743	-0.22
chr4-133970004-133970654	2.478	0.007	TAL1.H12CORE.1.P.B_TAL1.H12CORE.1.P.B	Hmgn2	1.522	1.743	-0.22
chr4-133970004-133970654	2.478	0.007	TAL1.H12CORE.2.P.B_TAL1.H12CORE.2.P.B	Hmgn2	1.522	1.743	-0.22
chr4-133970004-133970654	2.478	0.007	TAL1.H12CORE.1.P.B_TAL1.H12CORE.1.P.B	Hmgn2	1.522	1.743	-0.22
chr4-133970004-133970654	2.478	0.007	TAL1.H12CORE.1.P.B_TAL1.H12CORE.1.P.B	Hmgn2	1.522	1.743	-0.22
chr4-133970004-133970654	2.478	0.007	TAL1.H12CORE.2.P.B_TAL1.H12CORE.2.P.B	Hmgn2	1.522	1.743	-0.22
chr11-54753924-54755435	-3.135	0.001	TAL1.H12CORE.0.P.B_TAL1.H12CORE.0.P.B	Kif3a	0.629	0.849	-0.22
chr11-54753924-54755435	-3.135	0.001	TAL1.H12CORE.1.P.B_TAL1.H12CORE.1.P.B	Kif3a	0.629	0.849	-0.22
chr11-54753924-54755435	-3.135	0.001	TAL1.H12CORE.0.P.B_TAL1.H12CORE.0.P.B	Kif3a	0.629	0.849	-0.22
chr11-54753924-54755435	-3.135	0.001	TAL1.H12CORE.1.P.B_TAL1.H12CORE.1.P.B	Kif3a	0.629	0.849	-0.22
chr4-43043784-43044423	-3.18	0.001	TAL1.H12CORE.1.P.B_TAL1.H12CORE.1.P.B	Ccl27a	0.753	0.973	-0.22
chr4-43043784-43044423	-3.18	0.001	TAL1.H12CORE.1.P.B_TAL1.H12CORE.1.P.B	Ccl27a	0.753	0.973	-0.22
chr4-43043784-43044423	-3.18	0.001	TAL1.H12CORE.1.P.B_TAL1.H12CORE.1.P.B	Ccl27a	0.753	0.973	-0.22
chr4-43043784-43044423	-3.18	0.001	TAL1.H12CORE.1.P.B_TAL1.H12CORE.1.P.B	Ccl27a	0.753	0.973	-0.22
chr11-88356143-88357733	-2.615	0.004	TAL1.H12CORE.2.P.B_TAL1.H12CORE.2.P.B	Dynll2	1.657	1.876	-0.219
chr11-88356143-88357733	-2.615	0.004	TAL1.H12CORE.2.P.B_TAL1.H12CORE.2.P.B	Dynll2	1.657	1.876	-0.219
chr7-25007588-25009656	3.819	0	TAL1.H12CORE.1.P.B_TAL1.H12CORE.1.P.B	Ttc9b	0.971	1.19	-0.219
chr7-25007588-25009656	3.819	0	TAL1.H12CORE.1.P.B_TAL1.H12CORE.1.P.B	Ttc9b	0.971	1.19	-0.219
chr7-25007588-25009656	3.819	0	TAL1.H12CORE.2.P.B_TAL1.H12CORE.2.P.B	Ttc9b	0.971	1.19	-0.219
chr7-25007588-25009656	3.819	0	TAL1.H12CORE.2.P.B_TAL1.H12CORE.2.P.B	Ttc9b	0.971	1.19	-0.219
chr7-25007588-25009656	3.819	0	TAL1.H12CORE.1.P.B_TAL1.H12CORE.1.P.B	Ttc9b	0.971	1.19	-0.219
chr7-25007588-25009656	3.819	0	TAL1.H12CORE.1.P.B_TAL1.H12CORE.1.P.B	Ttc9b	0.971	1.19	-0.219
chr7-25007588-25009656	3.819	0	TAL1.H12CORE.2.P.B_TAL1.H12CORE.2.P.B	Ttc9b	0.971	1.19	-0.219
chr7-25007588-25009656	3.819	0	TAL1.H12CORE.2.P.B_TAL1.H12CORE.2.P.B	Ttc9b	0.971	1.19	-0.219
chr3-32066596-32067900	4.219	0	TAL1.H12CORE.2.P.B_TAL1.H12CORE.2.P.B	Skil	0.628	0.846	-0.219
chr3-32066596-32067900	4.219	0	TAL1.H12CORE.2.P.B_TAL1.H12CORE.2.P.B	Skil	0.628	0.846	-0.219
chr11-98748370-98751340	-4.561	0	TAL1.H12CORE.1.P.B_TAL1.H12CORE.1.P.B	Thra	1.341	1.559	-0.218
chr11-98748370-98751340	-4.561	0	TAL1.H12CORE.1.P.B_TAL1.H12CORE.1.P.B	Thra	1.341	1.559	-0.218
chr11-98748370-98751340	-4.561	0	TAL1.H12CORE.1.P.B_TAL1.H12CORE.1.P.B	Thra	1.341	1.559	-0.218
chr11-98748370-98751340	-4.561	0	TAL1.H12CORE.2.P.B_TAL1.H12CORE.2.P.B	Thra	1.341	1.559	-0.218
chr11-98748370-98751340	-4.561	0	TAL1.H12CORE.2.P.B_TAL1.H12CORE.2.P.B	Thra	1.341	1.559	-0.218
chr11-98748370-98751340	-4.561	0	TAL1.H12CORE.2.P.B_TAL1.H12CORE.2.P.B	Thra	1.341	1.559	-0.218
chr11-98748370-98751340	-4.561	0	TAL1.H12CORE.2.P.B_TAL1.H12CORE.2.P.B	Thra	1.341	1.559	-0.218
chr11-98748370-98751340	-4.561	0	TAL1.H12CORE.1.P.B_TAL1.H12CORE.1.P.B	Thra	1.341	1.559	-0.218
chr11-98748370-98751340	-4.561	0	TAL1.H12CORE.1.P.B_TAL1.H12CORE.1.P.B	Thra	1.341	1.559	-0.218
chr11-98748370-98751340	-4.561	0	TAL1.H12CORE.1.P.B_TAL1.H12CORE.1.P.B	Thra	1.341	1.559	-0.218
chr11-98748370-98751340	-4.561	0	TAL1.H12CORE.2.P.B_TAL1.H12CORE.2.P.B	Thra	1.341	1.559	-0.218
chr11-98748370-98751340	-4.561	0	TAL1.H12CORE.2.P.B_TAL1.H12CORE.2.P.B	Thra	1.341	1.559	-0.218
chr11-98748370-98751340	-4.561	0	TAL1.H12CORE.2.P.B_TAL1.H12CORE.2.P.B	Thra	1.341	1.559	-0.218
chr11-98748370-98751340	-4.561	0	TAL1.H12CORE.2.P.B_TAL1.H12CORE.2.P.B	Thra	1.341	1.559	-0.218
chr1-134713244-134714452	-3.881	0	TAL1.H12CORE.1.P.B_TAL1.H12CORE.1.P.B	Arl8a	0.677	0.894	-0.217
chr1-134713244-134714452	-3.881	0	TAL1.H12CORE.2.P.B_TAL1.H12CORE.2.P.B	Arl8a	0.677	0.894	-0.217
chr1-134713244-134714452	-3.881	0	TAL1.H12CORE.1.P.B_TAL1.H12CORE.1.P.B	Arl8a	0.677	0.894	-0.217
chr1-134713244-134714452	-3.881	0	TAL1.H12CORE.2.P.B_TAL1.H12CORE.2.P.B	Arl8a	0.677	0.894	-0.217
chr16-77399742-77401305	-4.118	0	TAL1.H12CORE.0.P.B_TAL1.H12CORE.0.P.B	Cxadr	0.841	1.055	-0.214
chr16-77399742-77401305	-4.118	0	TAL1.H12CORE.1.P.B_TAL1.H12CORE.1.P.B	Cxadr	0.841	1.055	-0.214
chr16-77399742-77401305	-4.118	0	TAL1.H12CORE.1.P.B_TAL1.H12CORE.1.P.B	Cxadr	0.841	1.055	-0.214
chr16-77399742-77401305	-4.118	0	TAL1.H12CORE.1.P.B_TAL1.H12CORE.1.P.B	Cxadr	0.841	1.055	-0.214
chr16-77399742-77401305	-4.118	0	TAL1.H12CORE.0.P.B_TAL1.H12CORE.0.P.B	Cxadr	0.841	1.055	-0.214
chr16-77399742-77401305	-4.118	0	TAL1.H12CORE.1.P.B_TAL1.H12CORE.1.P.B	Cxadr	0.841	1.055	-0.214
chr16-77399742-77401305	-4.118	0	TAL1.H12CORE.1.P.B_TAL1.H12CORE.1.P.B	Cxadr	0.841	1.055	-0.214
chr16-77399742-77401305	-4.118	0	TAL1.H12CORE.1.P.B_TAL1.H12CORE.1.P.B	Cxadr	0.841	1.055	-0.214
chr10-126956471-126958161	-2.384	0.009	TAL1.H12CORE.2.P.B_TAL1.H12CORE.2.P.B	Myl6	2.6	2.813	-0.213
chr10-126956471-126958161	-2.384	0.009	TAL1.H12CORE.2.P.B_TAL1.H12CORE.2.P.B	Myl6	2.6	2.813	-0.213
chr10-127077610-127080151	3.174	0.001	TAL1.H12CORE.1.P.B_TAL1.H12CORE.1.P.B	Myl6	2.6	2.813	-0.213
chr10-127077610-127080151	3.174	0.001	TAL1.H12CORE.1.P.B_TAL1.H12CORE.1.P.B	Myl6	2.6	2.813	-0.213
chr4-107828394-107829238	-3.365	0	TAL1.H12CORE.2.P.B_TAL1.H12CORE.2.P.B	Zcchc11	1.078	1.287	-0.209
chr4-107828394-107829238	-3.365	0	TAL1.H12CORE.2.P.B_TAL1.H12CORE.2.P.B	Zcchc11	1.078	1.287	-0.209
chr4-109224475-109225927	-4.713	0	TAL1.H12CORE.0.P.B_TAL1.H12CORE.0.P.B	Zcchc11	1.078	1.287	-0.209
chr4-109224475-109225927	-4.713	0	TAL1.H12CORE.0.P.B_TAL1.H12CORE.0.P.B	Zcchc11	1.078	1.287	-0.209
chr11-116332209-116332940	-3.126	0.001	TAL1.H12CORE.1.P.B_TAL1.H12CORE.1.P.B	Ube2o	0.327	0.536	-0.209
chr11-116332209-116332940	-3.126	0.001	TAL1.H12CORE.1.P.B_TAL1.H12CORE.1.P.B	Ube2o	0.327	0.536	-0.209
chr8-12125852-12128328	-4.439	0	TAL1.H12CORE.0.P.B_TAL1.H12CORE.0.P.B	Mcf2l	0.277	0.485	-0.209
chr8-12125852-12128328	-4.439	0	TAL1.H12CORE.1.P.B_TAL1.H12CORE.1.P.B	Mcf2l	0.277	0.485	-0.209
chr8-12125852-12128328	-4.439	0	TAL1.H12CORE.2.P.B_TAL1.H12CORE.2.P.B	Mcf2l	0.277	0.485	-0.209
chr8-12125852-12128328	-4.439	0	TAL1.H12CORE.0.P.B_TAL1.H12CORE.0.P.B	Mcf2l	0.277	0.485	-0.209
chr8-12125852-12128328	-4.439	0	TAL1.H12CORE.1.P.B_TAL1.H12CORE.1.P.B	Mcf2l	0.277	0.485	-0.209
chr8-12125852-12128328	-4.439	0	TAL1.H12CORE.2.P.B_TAL1.H12CORE.2.P.B	Mcf2l	0.277	0.485	-0.209
chr8-12384550-12386414	-2.643	0.004	TAL1.H12CORE.1.P.B_TAL1.H12CORE.1.P.B	Mcf2l	0.277	0.485	-0.209
chr8-12384550-12386414	-2.643	0.004	TAL1.H12CORE.1.P.B_TAL1.H12CORE.1.P.B	Mcf2l	0.277	0.485	-0.209
chr8-12394864-12396409	-5.73	0	TAL1.H12CORE.2.P.B_TAL1.H12CORE.2.P.B	Mcf2l	0.277	0.485	-0.209
chr8-12394864-12396409	-5.73	0	TAL1.H12CORE.2.P.B_TAL1.H12CORE.2.P.B	Mcf2l	0.277	0.485	-0.209
chr19-21788898-21790606	4.178	0	TAL1.H12CORE.2.P.B_TAL1.H12CORE.2.P.B	Tmem2	0.659	0.865	-0.206
chr19-21788898-21790606	4.178	0	TAL1.H12CORE.2.P.B_TAL1.H12CORE.2.P.B	Tmem2	0.659	0.865	-0.206
chr18-35814237-35816482	3.489	0	TAL1.H12CORE.0.P.B_TAL1.H12CORE.0.P.B	Cxxc5	0.74	0.946	-0.206
chr18-35814237-35816482	3.489	0	TAL1.H12CORE.0.P.B_TAL1.H12CORE.0.P.B	Cxxc5	0.74	0.946	-0.206
chr18-35814237-35816482	3.489	0	TAL1.H12CORE.2.P.B_TAL1.H12CORE.2.P.B	Cxxc5	0.74	0.946	-0.206
chr18-35814237-35816482	3.489	0	TAL1.H12CORE.0.P.B_TAL1.H12CORE.0.P.B	Cxxc5	0.74	0.946	-0.206
chr18-35814237-35816482	3.489	0	TAL1.H12CORE.0.P.B_TAL1.H12CORE.0.P.B	Cxxc5	0.74	0.946	-0.206
chr18-35814237-35816482	3.489	0	TAL1.H12CORE.2.P.B_TAL1.H12CORE.2.P.B	Cxxc5	0.74	0.946	-0.206
chr18-35887369-35890083	4.556	0	TAL1.H12CORE.1.P.B_TAL1.H12CORE.1.P.B	Cxxc5	0.74	0.946	-0.206
chr18-35887369-35890083	4.556	0	TAL1.H12CORE.2.P.B_TAL1.H12CORE.2.P.B	Cxxc5	0.74	0.946	-0.206
chr18-35887369-35890083	4.556	0	TAL1.H12CORE.1.P.B_TAL1.H12CORE.1.P.B	Cxxc5	0.74	0.946	-0.206
chr18-35887369-35890083	4.556	0	TAL1.H12CORE.2.P.B_TAL1.H12CORE.2.P.B	Cxxc5	0.74	0.946	-0.206
chr18-35918449-35921558	5.746	0	TAL1.H12CORE.1.P.B_TAL1.H12CORE.1.P.B	Cxxc5	0.74	0.946	-0.206
chr18-35918449-35921558	5.746	0	TAL1.H12CORE.1.P.B_TAL1.H12CORE.1.P.B	Cxxc5	0.74	0.946	-0.206
chr18-35918449-35921558	5.746	0	TAL1.H12CORE.1.P.B_TAL1.H12CORE.1.P.B	Cxxc5	0.74	0.946	-0.206
chr18-35918449-35921558	5.746	0	TAL1.H12CORE.2.P.B_TAL1.H12CORE.2.P.B	Cxxc5	0.74	0.946	-0.206
chr18-35918449-35921558	5.746	0	TAL1.H12CORE.2.P.B_TAL1.H12CORE.2.P.B	Cxxc5	0.74	0.946	-0.206
chr18-35918449-35921558	5.746	0	TAL1.H12CORE.2.P.B_TAL1.H12CORE.2.P.B	Cxxc5	0.74	0.946	-0.206
chr18-35918449-35921558	5.746	0	TAL1.H12CORE.1.P.B_TAL1.H12CORE.1.P.B	Cxxc5	0.74	0.946	-0.206
chr18-35918449-35921558	5.746	0	TAL1.H12CORE.1.P.B_TAL1.H12CORE.1.P.B	Cxxc5	0.74	0.946	-0.206
chr18-35918449-35921558	5.746	0	TAL1.H12CORE.1.P.B_TAL1.H12CORE.1.P.B	Cxxc5	0.74	0.946	-0.206
chr18-35918449-35921558	5.746	0	TAL1.H12CORE.2.P.B_TAL1.H12CORE.2.P.B	Cxxc5	0.74	0.946	-0.206
chr18-35918449-35921558	5.746	0	TAL1.H12CORE.2.P.B_TAL1.H12CORE.2.P.B	Cxxc5	0.74	0.946	-0.206
chr18-35918449-35921558	5.746	0	TAL1.H12CORE.2.P.B_TAL1.H12CORE.2.P.B	Cxxc5	0.74	0.946	-0.206
chr2-25185352-25186665	2.783	0.003	TAL1.H12CORE.2.P.B_TAL1.H12CORE.2.P.B	Tubb4b	1.084	1.29	-0.206
chr2-25185352-25186665	2.783	0.003	TAL1.H12CORE.2.P.B_TAL1.H12CORE.2.P.B	Tubb4b	1.084	1.29	-0.206
chr2-26090657-26092549	3.03	0.001	TAL1.H12CORE.1.P.B_TAL1.H12CORE.1.P.B	Tubb4b	1.084	1.29	-0.206
chr2-26090657-26092549	3.03	0.001	TAL1.H12CORE.1.P.B_TAL1.H12CORE.1.P.B	Tubb4b	1.084	1.29	-0.206
chr2-26207235-26208459	2.671	0.004	TAL1.H12CORE.1.P.B_TAL1.H12CORE.1.P.B	Tubb4b	1.084	1.29	-0.206
chr2-26207235-26208459	2.671	0.004	TAL1.H12CORE.1.P.B_TAL1.H12CORE.1.P.B	Tubb4b	1.084	1.29	-0.206
chr2-26486498-26488060	3.19	0.001	TAL1.H12CORE.2.P.B_TAL1.H12CORE.2.P.B	Tubb4b	1.084	1.29	-0.206
chr2-26486498-26488060	3.19	0.001	TAL1.H12CORE.2.P.B_TAL1.H12CORE.2.P.B	Tubb4b	1.084	1.29	-0.206
chr2-26501583-26504134	3.465	0	TAL1.H12CORE.2.P.B_TAL1.H12CORE.2.P.B	Tubb4b	1.084	1.29	-0.206
chr2-26501583-26504134	3.465	0	TAL1.H12CORE.2.P.B_TAL1.H12CORE.2.P.B	Tubb4b	1.084	1.29	-0.206
chr10-80259789-80261976	-3.27	0.001	TAL1.H12CORE.2.P.B_TAL1.H12CORE.2.P.B	Abhd17a	0.821	1.025	-0.204
chr10-80259789-80261976	-3.27	0.001	TAL1.H12CORE.2.P.B_TAL1.H12CORE.2.P.B	Abhd17a	0.821	1.025	-0.204
chr2-102002379-102003936	-3.169	0.001	TAL1.H12CORE.2.P.B_TAL1.H12CORE.2.P.B	Slc1a2	0.093	0.295	-0.203
chr2-102002379-102003936	-3.169	0.001	TAL1.H12CORE.2.P.B_TAL1.H12CORE.2.P.B	Slc1a2	0.093	0.295	-0.203
chr7-25007588-25009656	4.042	0	TAL1.H12CORE.1.P.B_TAL1.H12CORE.1.P.B	Atp1a3	0.36	0.559	-0.199
chr7-25007588-25009656	4.042	0	TAL1.H12CORE.1.P.B_TAL1.H12CORE.1.P.B	Atp1a3	0.36	0.559	-0.199
chr7-25007588-25009656	4.042	0	TAL1.H12CORE.2.P.B_TAL1.H12CORE.2.P.B	Atp1a3	0.36	0.559	-0.199
chr7-25007588-25009656	4.042	0	TAL1.H12CORE.2.P.B_TAL1.H12CORE.2.P.B	Atp1a3	0.36	0.559	-0.199
chr7-25007588-25009656	4.042	0	TAL1.H12CORE.1.P.B_TAL1.H12CORE.1.P.B	Atp1a3	0.36	0.559	-0.199
chr7-25007588-25009656	4.042	0	TAL1.H12CORE.1.P.B_TAL1.H12CORE.1.P.B	Atp1a3	0.36	0.559	-0.199
chr7-25007588-25009656	4.042	0	TAL1.H12CORE.2.P.B_TAL1.H12CORE.2.P.B	Atp1a3	0.36	0.559	-0.199
chr7-25007588-25009656	4.042	0	TAL1.H12CORE.2.P.B_TAL1.H12CORE.2.P.B	Atp1a3	0.36	0.559	-0.199
chr7-25153348-25154327	2.369	0.009	TAL1.H12CORE.1.P.B_TAL1.H12CORE.1.P.B	Atp1a3	0.36	0.559	-0.199
chr7-25153348-25154327	2.369	0.009	TAL1.H12CORE.1.P.B_TAL1.H12CORE.1.P.B	Atp1a3	0.36	0.559	-0.199
chr1-155741611-155743304	3.279	0.001	TAL1.H12CORE.0.P.B_TAL1.H12CORE.0.P.B	Qsox1	0.231	0.43	-0.199
chr1-155741611-155743304	3.279	0.001	TAL1.H12CORE.2.P.B_TAL1.H12CORE.2.P.B	Qsox1	0.231	0.43	-0.199
chr1-155741611-155743304	3.279	0.001	TAL1.H12CORE.0.P.B_TAL1.H12CORE.0.P.B	Qsox1	0.231	0.43	-0.199
chr1-155741611-155743304	3.279	0.001	TAL1.H12CORE.2.P.B_TAL1.H12CORE.2.P.B	Qsox1	0.231	0.43	-0.199
chr3-57574596-57576826	-2.856	0.002	TAL1.H12CORE.1.P.B_TAL1.H12CORE.1.P.B	Nbea	0.395	0.59	-0.195
chr3-57574596-57576826	-2.856	0.002	TAL1.H12CORE.1.P.B_TAL1.H12CORE.1.P.B	Nbea	0.395	0.59	-0.195
chr4-136749094-136751374	-2.58	0.005	TAL1.H12CORE.2.P.B_TAL1.H12CORE.2.P.B	Cdc42	2.186	2.38	-0.195
chr4-136749094-136751374	-2.58	0.005	TAL1.H12CORE.2.P.B_TAL1.H12CORE.2.P.B	Cdc42	2.186	2.38	-0.195
chr4-136749094-136751374	-2.58	0.005	TAL1.H12CORE.2.P.B_TAL1.H12CORE.2.P.B	Cdc42	2.186	2.38	-0.195
chr4-136749094-136751374	-2.58	0.005	TAL1.H12CORE.2.P.B_TAL1.H12CORE.2.P.B	Cdc42	2.186	2.38	-0.195
chr2-21917604-21919635	-2.339	0.01	TAL1.H12CORE.1.P.B_TAL1.H12CORE.1.P.B	Arhgap21	0.418	0.612	-0.194
chr2-21917604-21919635	-2.339	0.01	TAL1.H12CORE.1.P.B_TAL1.H12CORE.1.P.B	Arhgap21	0.418	0.612	-0.194
chr3-115712680-115715712	4.34	0	TAL1.H12CORE.1.P.B_TAL1.H12CORE.1.P.B	S1pr1	0.001	0.194	-0.194
chr3-115712680-115715712	4.34	0	TAL1.H12CORE.2.P.B_TAL1.H12CORE.2.P.B	S1pr1	0.001	0.194	-0.194
chr3-115712680-115715712	4.34	0	TAL1.H12CORE.1.P.B_TAL1.H12CORE.1.P.B	S1pr1	0.001	0.194	-0.194
chr3-115712680-115715712	4.34	0	TAL1.H12CORE.2.P.B_TAL1.H12CORE.2.P.B	S1pr1	0.001	0.194	-0.194
chr14-103777254-103779476	-2.746	0.003	TAL1.H12CORE.2.P.B_TAL1.H12CORE.2.P.B	Mycbp2	0.946	1.139	-0.193
chr14-103777254-103779476	-2.746	0.003	TAL1.H12CORE.2.P.B_TAL1.H12CORE.2.P.B	Mycbp2	0.946	1.139	-0.193
chr13-55171246-55172465	2.477	0.007	TAL1.H12CORE.2.P.B_TAL1.H12CORE.2.P.B	Neurog1	0.034	0.228	-0.193
chr13-55171246-55172465	2.477	0.007	TAL1.H12CORE.2.P.B_TAL1.H12CORE.2.P.B	Neurog1	0.034	0.228	-0.193
chr13-56207830-56209332	3.947	0	TAL1.H12CORE.1.P.B_TAL1.H12CORE.1.P.B	Neurog1	0.034	0.228	-0.193
chr13-56207830-56209332	3.947	0	TAL1.H12CORE.1.P.B_TAL1.H12CORE.1.P.B	Neurog1	0.034	0.228	-0.193
chr13-56207830-56209332	3.947	0	TAL1.H12CORE.2.P.B_TAL1.H12CORE.2.P.B	Neurog1	0.034	0.228	-0.193
chr13-56207830-56209332	3.947	0	TAL1.H12CORE.2.P.B_TAL1.H12CORE.2.P.B	Neurog1	0.034	0.228	-0.193
chr13-56220812-56222467	4.095	0	TAL1.H12CORE.2.P.B_TAL1.H12CORE.2.P.B	Neurog1	0.034	0.228	-0.193
chr13-56581148-56583114	2.909	0.002	TAL1.H12CORE.1.P.B_TAL1.H12CORE.1.P.B	Neurog1	0.034	0.228	-0.193
chr13-56581148-56583114	2.909	0.002	TAL1.H12CORE.1.P.B_TAL1.H12CORE.1.P.B	Neurog1	0.034	0.228	-0.193
chr13-56581148-56583114	2.909	0.002	TAL1.H12CORE.2.P.B_TAL1.H12CORE.2.P.B	Neurog1	0.034	0.228	-0.193
chr13-56581148-56583114	2.909	0.002	TAL1.H12CORE.2.P.B_TAL1.H12CORE.2.P.B	Neurog1	0.034	0.228	-0.193
chr13-56581148-56583114	2.909	0.002	TAL1.H12CORE.2.P.B_TAL1.H12CORE.2.P.B	Neurog1	0.034	0.228	-0.193
chr7-25007588-25009656	4.281	0	TAL1.H12CORE.1.P.B_TAL1.H12CORE.1.P.B	Pafah1b3	2.458	2.65	-0.192
chr7-25007588-25009656	4.281	0	TAL1.H12CORE.1.P.B_TAL1.H12CORE.1.P.B	Pafah1b3	2.458	2.65	-0.192
chr7-25007588-25009656	4.281	0	TAL1.H12CORE.2.P.B_TAL1.H12CORE.2.P.B	Pafah1b3	2.458	2.65	-0.192
chr7-25007588-25009656	4.281	0	TAL1.H12CORE.2.P.B_TAL1.H12CORE.2.P.B	Pafah1b3	2.458	2.65	-0.192
chr7-25007588-25009656	4.281	0	TAL1.H12CORE.1.P.B_TAL1.H12CORE.1.P.B	Pafah1b3	2.458	2.65	-0.192
chr7-25007588-25009656	4.281	0	TAL1.H12CORE.1.P.B_TAL1.H12CORE.1.P.B	Pafah1b3	2.458	2.65	-0.192
chr7-25007588-25009656	4.281	0	TAL1.H12CORE.2.P.B_TAL1.H12CORE.2.P.B	Pafah1b3	2.458	2.65	-0.192
chr7-25007588-25009656	4.281	0	TAL1.H12CORE.2.P.B_TAL1.H12CORE.2.P.B	Pafah1b3	2.458	2.65	-0.192
chr9-56633748-56636631	2.843	0.002	TAL1.H12CORE.1.P.B_TAL1.H12CORE.1.P.B	Lingo1	0.14	0.332	-0.192
chr9-56633748-56636631	2.843	0.002	TAL1.H12CORE.1.P.B_TAL1.H12CORE.1.P.B	Lingo1	0.14	0.332	-0.192
chr9-56795326-56797193	2.974	0.001	TAL1.H12CORE.1.P.B_TAL1.H12CORE.1.P.B	Lingo1	0.14	0.332	-0.192
chr9-56795326-56797193	2.974	0.001	TAL1.H12CORE.2.P.B_TAL1.H12CORE.2.P.B	Lingo1	0.14	0.332	-0.192
chr9-56795326-56797193	2.974	0.001	TAL1.H12CORE.1.P.B_TAL1.H12CORE.1.P.B	Lingo1	0.14	0.332	-0.192
chr9-56795326-56797193	2.974	0.001	TAL1.H12CORE.2.P.B_TAL1.H12CORE.2.P.B	Lingo1	0.14	0.332	-0.192
chr11-118972464-118973476	4.049	0	TAL1.H12CORE.1.P.B_TAL1.H12CORE.1.P.B	Rbfox3	0.23	0.42	-0.19
chr11-118972464-118973476	4.049	0	TAL1.H12CORE.2.P.B_TAL1.H12CORE.2.P.B	Rbfox3	0.23	0.42	-0.19
chr11-118972464-118973476	4.049	0	TAL1.H12CORE.1.P.B_TAL1.H12CORE.1.P.B	Rbfox3	0.23	0.42	-0.19
chr11-118972464-118973476	4.049	0	TAL1.H12CORE.2.P.B_TAL1.H12CORE.2.P.B	Rbfox3	0.23	0.42	-0.19
chr3-57574596-57576826	-2.851	0.002	TAL1.H12CORE.1.P.B_TAL1.H12CORE.1.P.B	Pfn2	2.189	2.379	-0.19
chr3-57574596-57576826	-2.851	0.002	TAL1.H12CORE.1.P.B_TAL1.H12CORE.1.P.B	Pfn2	2.189	2.379	-0.19
chr9-61110890-61112484	5.26	0	TAL1.H12CORE.1.P.B_TAL1.H12CORE.1.P.B	Tle3	0.628	0.818	-0.189
chr9-61110890-61112484	5.26	0	TAL1.H12CORE.2.P.B_TAL1.H12CORE.2.P.B	Tle3	0.628	0.818	-0.189
chr9-61110890-61112484	5.26	0	TAL1.H12CORE.1.P.B_TAL1.H12CORE.1.P.B	Tle3	0.628	0.818	-0.189
chr9-61110890-61112484	5.26	0	TAL1.H12CORE.2.P.B_TAL1.H12CORE.2.P.B	Tle3	0.628	0.818	-0.189
chr9-61433706-61434528	2.54	0.006	TAL1.H12CORE.1.P.B_TAL1.H12CORE.1.P.B	Tle3	0.628	0.818	-0.189
chr9-61433706-61434528	2.54	0.006	TAL1.H12CORE.1.P.B_TAL1.H12CORE.1.P.B	Tle3	0.628	0.818	-0.189
chr9-61433706-61434528	2.54	0.006	TAL1.H12CORE.2.P.B_TAL1.H12CORE.2.P.B	Tle3	0.628	0.818	-0.189
chr9-61433706-61434528	2.54	0.006	TAL1.H12CORE.1.P.B_TAL1.H12CORE.1.P.B	Tle3	0.628	0.818	-0.189
chr9-61433706-61434528	2.54	0.006	TAL1.H12CORE.1.P.B_TAL1.H12CORE.1.P.B	Tle3	0.628	0.818	-0.189
chr9-61433706-61434528	2.54	0.006	TAL1.H12CORE.2.P.B_TAL1.H12CORE.2.P.B	Tle3	0.628	0.818	-0.189
chr9-61573216-61574498	4.264	0	TAL1.H12CORE.0.P.B_TAL1.H12CORE.0.P.B	Tle3	0.628	0.818	-0.189
chr9-61573216-61574498	4.264	0	TAL1.H12CORE.0.P.B_TAL1.H12CORE.0.P.B	Tle3	0.628	0.818	-0.189
chr9-61573216-61574498	4.264	0	TAL1.H12CORE.0.P.B_TAL1.H12CORE.0.P.B	Tle3	0.628	0.818	-0.189
chr9-61573216-61574498	4.264	0	TAL1.H12CORE.1.P.B_TAL1.H12CORE.1.P.B	Tle3	0.628	0.818	-0.189
chr9-61573216-61574498	4.264	0	TAL1.H12CORE.0.P.B_TAL1.H12CORE.0.P.B	Tle3	0.628	0.818	-0.189
chr9-61573216-61574498	4.264	0	TAL1.H12CORE.0.P.B_TAL1.H12CORE.0.P.B	Tle3	0.628	0.818	-0.189
chr9-61573216-61574498	4.264	0	TAL1.H12CORE.0.P.B_TAL1.H12CORE.0.P.B	Tle3	0.628	0.818	-0.189
chr9-61573216-61574498	4.264	0	TAL1.H12CORE.1.P.B_TAL1.H12CORE.1.P.B	Tle3	0.628	0.818	-0.189
chr9-61871638-61873040	4.558	0	TAL1.H12CORE.2.P.B_TAL1.H12CORE.2.P.B	Tle3	0.628	0.818	-0.189
chr9-61871638-61873040	4.558	0	TAL1.H12CORE.2.P.B_TAL1.H12CORE.2.P.B	Tle3	0.628	0.818	-0.189
chr11-102227380-102228571	4	0	TAL1.H12CORE.1.P.B_TAL1.H12CORE.1.P.B	Hdac5	0.253	0.441	-0.189
chr11-102227380-102228571	4	0	TAL1.H12CORE.1.P.B_TAL1.H12CORE.1.P.B	Hdac5	0.253	0.441	-0.189
chr11-102227380-102228571	4	0	TAL1.H12CORE.2.P.B_TAL1.H12CORE.2.P.B	Hdac5	0.253	0.441	-0.189
chr11-102227380-102228571	4	0	TAL1.H12CORE.1.P.B_TAL1.H12CORE.1.P.B	Hdac5	0.253	0.441	-0.189
chr11-102227380-102228571	4	0	TAL1.H12CORE.1.P.B_TAL1.H12CORE.1.P.B	Hdac5	0.253	0.441	-0.189
chr11-102227380-102228571	4	0	TAL1.H12CORE.2.P.B_TAL1.H12CORE.2.P.B	Hdac5	0.253	0.441	-0.189
chr6-72215678-72217640	-3.465	0	TAL1.H12CORE.1.P.B_TAL1.H12CORE.1.P.B	Reep1	0.426	0.615	-0.188
chr6-72215678-72217640	-3.465	0	TAL1.H12CORE.1.P.B_TAL1.H12CORE.1.P.B	Reep1	0.426	0.615	-0.188
chr6-72215678-72217640	-3.465	0	TAL1.H12CORE.2.P.B_TAL1.H12CORE.2.P.B	Reep1	0.426	0.615	-0.188
chr6-72215678-72217640	-3.465	0	TAL1.H12CORE.2.P.B_TAL1.H12CORE.2.P.B	Reep1	0.426	0.615	-0.188
chr6-72215678-72217640	-3.465	0	TAL1.H12CORE.2.P.B_TAL1.H12CORE.2.P.B	Reep1	0.426	0.615	-0.188
chr6-72215678-72217640	-3.465	0	TAL1.H12CORE.1.P.B_TAL1.H12CORE.1.P.B	Reep1	0.426	0.615	-0.188
chr6-72215678-72217640	-3.465	0	TAL1.H12CORE.1.P.B_TAL1.H12CORE.1.P.B	Reep1	0.426	0.615	-0.188
chr6-72215678-72217640	-3.465	0	TAL1.H12CORE.2.P.B_TAL1.H12CORE.2.P.B	Reep1	0.426	0.615	-0.188
chr6-72215678-72217640	-3.465	0	TAL1.H12CORE.2.P.B_TAL1.H12CORE.2.P.B	Reep1	0.426	0.615	-0.188
chr6-72215678-72217640	-3.465	0	TAL1.H12CORE.2.P.B_TAL1.H12CORE.2.P.B	Reep1	0.426	0.615	-0.188
chr6-72787100-72789767	-2.412	0.008	TAL1.H12CORE.2.P.B_TAL1.H12CORE.2.P.B	Reep1	0.426	0.615	-0.188
chr6-72787100-72789767	-2.412	0.008	TAL1.H12CORE.2.P.B_TAL1.H12CORE.2.P.B	Reep1	0.426	0.615	-0.188
chr1-176993741-176995274	-2.957	0.002	TAL1.H12CORE.1.P.B_TAL1.H12CORE.1.P.B	Kif26b	0.014	0.202	-0.188
chr1-176993741-176995274	-2.957	0.002	TAL1.H12CORE.2.P.B_TAL1.H12CORE.2.P.B	Kif26b	0.014	0.202	-0.188
chr1-176993741-176995274	-2.957	0.002	TAL1.H12CORE.1.P.B_TAL1.H12CORE.1.P.B	Kif26b	0.014	0.202	-0.188
chr1-176993741-176995274	-2.957	0.002	TAL1.H12CORE.2.P.B_TAL1.H12CORE.2.P.B	Kif26b	0.014	0.202	-0.188
chr2-31636217-31637206	-3.375	0	TAL1.H12CORE.1.P.B_TAL1.H12CORE.1.P.B	Dnm1	0.074	0.262	-0.188
chr2-31636217-31637206	-3.375	0	TAL1.H12CORE.1.P.B_TAL1.H12CORE.1.P.B	Dnm1	0.074	0.262	-0.188
chr2-32322474-32323716	3.424	0	TAL1.H12CORE.2.P.B_TAL1.H12CORE.2.P.B	Dnm1	0.074	0.262	-0.188
chr2-32322474-32323716	3.424	0	TAL1.H12CORE.2.P.B_TAL1.H12CORE.2.P.B	Dnm1	0.074	0.262	-0.188
chr2-32740700-32742637	2.697	0.003	TAL1.H12CORE.1.P.B_TAL1.H12CORE.1.P.B	Dnm1	0.074	0.262	-0.188
chr2-32740700-32742637	2.697	0.003	TAL1.H12CORE.1.P.B_TAL1.H12CORE.1.P.B	Dnm1	0.074	0.262	-0.188
chr9-20663561-20664744	2.992	0.001	TAL1.H12CORE.1.P.B_TAL1.H12CORE.1.P.B	Elavl3	2.284	2.47	-0.186
chr9-20663561-20664744	2.992	0.001	TAL1.H12CORE.2.P.B_TAL1.H12CORE.2.P.B	Elavl3	2.284	2.47	-0.186
chr9-20663561-20664744	2.992	0.001	TAL1.H12CORE.1.P.B_TAL1.H12CORE.1.P.B	Elavl3	2.284	2.47	-0.186
chr9-20663561-20664744	2.992	0.001	TAL1.H12CORE.2.P.B_TAL1.H12CORE.2.P.B	Elavl3	2.284	2.47	-0.186
chr9-22049407-22052205	2.732	0.003	TAL1.H12CORE.2.P.B_TAL1.H12CORE.2.P.B	Elavl3	2.284	2.47	-0.186
chr9-22049407-22052205	2.732	0.003	TAL1.H12CORE.2.P.B_TAL1.H12CORE.2.P.B	Elavl3	2.284	2.47	-0.186
chr3-8865440-8867082	-3.019	0.001	TAL1.H12CORE.1.P.B_TAL1.H12CORE.1.P.B	2700069I18Rik	0.085	0.269	-0.183
chr3-8865440-8867082	-3.019	0.001	TAL1.H12CORE.1.P.B_TAL1.H12CORE.1.P.B	2700069I18Rik	0.085	0.269	-0.183
chr3-8865440-8867082	-3.019	0.001	TAL1.H12CORE.2.P.B_TAL1.H12CORE.2.P.B	2700069I18Rik	0.085	0.269	-0.183
chr17-56509187-56510130	-2.455	0.007	TAL1.H12CORE.1.P.B_TAL1.H12CORE.1.P.B	Fsd1	0.48	0.662	-0.182
chr17-56509187-56510130	-2.455	0.007	TAL1.H12CORE.2.P.B_TAL1.H12CORE.2.P.B	Fsd1	0.48	0.662	-0.182
chr17-56509187-56510130	-2.455	0.007	TAL1.H12CORE.1.P.B_TAL1.H12CORE.1.P.B	Fsd1	0.48	0.662	-0.182
chr17-56509187-56510130	-2.455	0.007	TAL1.H12CORE.2.P.B_TAL1.H12CORE.2.P.B	Fsd1	0.48	0.662	-0.182
chr8-122719602-122721611	2.465	0.007	TAL1.H12CORE.0.P.B_TAL1.H12CORE.0.P.B	Tcf25	1.153	1.334	-0.18
chr8-122719602-122721611	2.465	0.007	TAL1.H12CORE.0.P.B_TAL1.H12CORE.0.P.B	Tcf25	1.153	1.334	-0.18
chr8-122719602-122721611	2.465	0.007	TAL1.H12CORE.0.P.B_TAL1.H12CORE.0.P.B	Tcf25	1.153	1.334	-0.18
chr8-122719602-122721611	2.465	0.007	TAL1.H12CORE.0.P.B_TAL1.H12CORE.0.P.B	Tcf25	1.153	1.334	-0.18
chr8-122719602-122721611	4.223	0	TAL1.H12CORE.0.P.B_TAL1.H12CORE.0.P.B	Tubb3	4.707	4.887	-0.18
chr8-122719602-122721611	4.223	0	TAL1.H12CORE.0.P.B_TAL1.H12CORE.0.P.B	Tubb3	4.707	4.887	-0.18
chr8-122719602-122721611	4.223	0	TAL1.H12CORE.0.P.B_TAL1.H12CORE.0.P.B	Tubb3	4.707	4.887	-0.18
chr8-122719602-122721611	4.223	0	TAL1.H12CORE.0.P.B_TAL1.H12CORE.0.P.B	Tubb3	4.707	4.887	-0.18
chr3-88221075-88222789	2.719	0.003	TAL1.H12CORE.2.P.B_TAL1.H12CORE.2.P.B	Ash1l	0.596	0.775	-0.179
chr3-88221075-88222789	2.719	0.003	TAL1.H12CORE.2.P.B_TAL1.H12CORE.2.P.B	Ash1l	0.596	0.775	-0.179
chr3-88230367-88232758	2.332	0.01	TAL1.H12CORE.1.P.B_TAL1.H12CORE.1.P.B	Ash1l	0.596	0.775	-0.179
chr3-88230367-88232758	2.332	0.01	TAL1.H12CORE.1.P.B_TAL1.H12CORE.1.P.B	Ash1l	0.596	0.775	-0.179
chr3-88230367-88232758	2.332	0.01	TAL1.H12CORE.2.P.B_TAL1.H12CORE.2.P.B	Ash1l	0.596	0.775	-0.179
chr3-88230367-88232758	2.332	0.01	TAL1.H12CORE.1.P.B_TAL1.H12CORE.1.P.B	Ash1l	0.596	0.775	-0.179
chr3-88230367-88232758	2.332	0.01	TAL1.H12CORE.1.P.B_TAL1.H12CORE.1.P.B	Ash1l	0.596	0.775	-0.179
chr3-88230367-88232758	2.332	0.01	TAL1.H12CORE.2.P.B_TAL1.H12CORE.2.P.B	Ash1l	0.596	0.775	-0.179
chr8-70656073-70657064	-4.726	0	TAL1.H12CORE.1.P.B_TAL1.H12CORE.1.P.B	Rab3a	1.308	1.487	-0.179
chr8-70656073-70657064	-4.726	0	TAL1.H12CORE.1.P.B_TAL1.H12CORE.1.P.B	Rab3a	1.308	1.487	-0.179
chr19-47013993-47015844	3.655	0	TAL1.H12CORE.2.P.B_TAL1.H12CORE.2.P.B	As3mt	0.204	0.382	-0.178
chr19-47013993-47015844	3.655	0	TAL1.H12CORE.2.P.B_TAL1.H12CORE.2.P.B	As3mt	0.204	0.382	-0.178
chr10-80259789-80261976	-3.197	0.001	TAL1.H12CORE.2.P.B_TAL1.H12CORE.2.P.B	Plppr3	1.008	1.186	-0.178
chr10-80259789-80261976	-3.197	0.001	TAL1.H12CORE.2.P.B_TAL1.H12CORE.2.P.B	Plppr3	1.008	1.186	-0.178
chr8-84701294-84701962	-4.434	0	TAL1.H12CORE.0.P.B_TAL1.H12CORE.0.P.B	Orc6	0.592	0.769	-0.177
chr8-84701294-84701962	-4.434	0	TAL1.H12CORE.0.P.B_TAL1.H12CORE.0.P.B	Orc6	0.592	0.769	-0.177
chr8-84701294-84701962	-4.434	0	TAL1.H12CORE.0.P.B_TAL1.H12CORE.0.P.B	Orc6	0.592	0.769	-0.177
chr8-84701294-84701962	-4.434	0	TAL1.H12CORE.0.P.B_TAL1.H12CORE.0.P.B	Orc6	0.592	0.769	-0.177
chr8-84729810-84732148	-5.08	0	TAL1.H12CORE.0.P.B_TAL1.H12CORE.0.P.B	Orc6	0.592	0.769	-0.177
chr8-84729810-84732148	-5.08	0	TAL1.H12CORE.0.P.B_TAL1.H12CORE.0.P.B	Orc6	0.592	0.769	-0.177
chr8-84729810-84732148	-5.08	0	TAL1.H12CORE.0.P.B_TAL1.H12CORE.0.P.B	Orc6	0.592	0.769	-0.177
chr8-84729810-84732148	-5.08	0	TAL1.H12CORE.0.P.B_TAL1.H12CORE.0.P.B	Orc6	0.592	0.769	-0.177
chr15-98001077-98005045	-2.531	0.006	TAL1.H12CORE.1.P.B_TAL1.H12CORE.1.P.B	Tuba1a	6.775	6.95	-0.175
chr15-98001077-98005045	-2.531	0.006	TAL1.H12CORE.1.P.B_TAL1.H12CORE.1.P.B	Tuba1a	6.775	6.95	-0.175
chr15-99094539-99095027	-3.282	0.001	TAL1.H12CORE.1.P.B_TAL1.H12CORE.1.P.B	Tuba1a	6.775	6.95	-0.175
chr15-99094539-99095027	-3.282	0.001	TAL1.H12CORE.1.P.B_TAL1.H12CORE.1.P.B	Tuba1a	6.775	6.95	-0.175
chr11-69364428-69365368	-2.713	0.003	TAL1.H12CORE.1.P.B_TAL1.H12CORE.1.P.B	Vamp2	0.847	1.022	-0.175
chr11-69364428-69365368	-2.713	0.003	TAL1.H12CORE.2.P.B_TAL1.H12CORE.2.P.B	Vamp2	0.847	1.022	-0.175
chr11-69364428-69365368	-2.713	0.003	TAL1.H12CORE.1.P.B_TAL1.H12CORE.1.P.B	Vamp2	0.847	1.022	-0.175
chr11-69364428-69365368	-2.713	0.003	TAL1.H12CORE.2.P.B_TAL1.H12CORE.2.P.B	Vamp2	0.847	1.022	-0.175
chr8-70656073-70657064	4.786	0	TAL1.H12CORE.1.P.B_TAL1.H12CORE.1.P.B	Pgpep1	0.216	0.391	-0.174
chr8-70656073-70657064	4.786	0	TAL1.H12CORE.1.P.B_TAL1.H12CORE.1.P.B	Pgpep1	0.216	0.391	-0.174
chr4-62582227-62584130	-2.622	0.004	TAL1.H12CORE.2.P.B_TAL1.H12CORE.2.P.B	Zfp618	0.651	0.825	-0.174
chr4-62582227-62584130	-2.622	0.004	TAL1.H12CORE.2.P.B_TAL1.H12CORE.2.P.B	Zfp618	0.651	0.825	-0.174
chr15-81802035-81803269	-3.311	0	TAL1.H12CORE.1.P.B_TAL1.H12CORE.1.P.B	Sept3	1.276	1.45	-0.174
chr15-81802035-81803269	-3.311	0	TAL1.H12CORE.1.P.B_TAL1.H12CORE.1.P.B	Sept3	1.276	1.45	-0.174
chr15-81802035-81803269	-3.311	0	TAL1.H12CORE.1.P.B_TAL1.H12CORE.1.P.B	Sept3	1.276	1.45	-0.174
chr15-81802035-81803269	-3.311	0	TAL1.H12CORE.2.P.B_TAL1.H12CORE.2.P.B	Sept3	1.276	1.45	-0.174
chr15-81802035-81803269	-3.311	0	TAL1.H12CORE.1.P.B_TAL1.H12CORE.1.P.B	Sept3	1.276	1.45	-0.174
chr15-81802035-81803269	-3.311	0	TAL1.H12CORE.1.P.B_TAL1.H12CORE.1.P.B	Sept3	1.276	1.45	-0.174
chr15-81802035-81803269	-3.311	0	TAL1.H12CORE.1.P.B_TAL1.H12CORE.1.P.B	Sept3	1.276	1.45	-0.174
chr15-81802035-81803269	-3.311	0	TAL1.H12CORE.2.P.B_TAL1.H12CORE.2.P.B	Sept3	1.276	1.45	-0.174
chr2-156839419-156842389	-4.442	0	TAL1.H12CORE.1.P.B_TAL1.H12CORE.1.P.B	Scand1	2.063	2.235	-0.172
chr2-156839419-156842389	-4.442	0	TAL1.H12CORE.2.P.B_TAL1.H12CORE.2.P.B	Scand1	2.063	2.235	-0.172
chr2-156839419-156842389	-4.442	0	TAL1.H12CORE.1.P.B_TAL1.H12CORE.1.P.B	Scand1	2.063	2.235	-0.172
chr2-156839419-156842389	-4.442	0	TAL1.H12CORE.2.P.B_TAL1.H12CORE.2.P.B	Scand1	2.063	2.235	-0.172
chr6-124862397-124864460	2.327	0.01	TAL1.H12CORE.1.P.B_TAL1.H12CORE.1.P.B	Gpr162	0.129	0.3	-0.171
chr6-124862397-124864460	2.327	0.01	TAL1.H12CORE.1.P.B_TAL1.H12CORE.1.P.B	Gpr162	0.129	0.3	-0.171
chr6-124862397-124864460	2.327	0.01	TAL1.H12CORE.2.P.B_TAL1.H12CORE.2.P.B	Gpr162	0.129	0.3	-0.171
chr6-124862397-124864460	2.327	0.01	TAL1.H12CORE.2.P.B_TAL1.H12CORE.2.P.B	Gpr162	0.129	0.3	-0.171
chr6-124862397-124864460	2.327	0.01	TAL1.H12CORE.1.P.B_TAL1.H12CORE.1.P.B	Gpr162	0.129	0.3	-0.171
chr6-124862397-124864460	2.327	0.01	TAL1.H12CORE.1.P.B_TAL1.H12CORE.1.P.B	Gpr162	0.129	0.3	-0.171
chr6-124862397-124864460	2.327	0.01	TAL1.H12CORE.2.P.B_TAL1.H12CORE.2.P.B	Gpr162	0.129	0.3	-0.171
chr6-124862397-124864460	2.327	0.01	TAL1.H12CORE.2.P.B_TAL1.H12CORE.2.P.B	Gpr162	0.129	0.3	-0.171
chr2-29835172-29836111	-3.653	0	TAL1.H12CORE.2.P.B_TAL1.H12CORE.2.P.B	Zer1	0.2	0.37	-0.17
chr2-29835172-29836111	-3.653	0	TAL1.H12CORE.2.P.B_TAL1.H12CORE.2.P.B	Zer1	0.2	0.37	-0.17
chr11-77893565-77894741	-2.808	0.002	TAL1.H12CORE.1.P.B_TAL1.H12CORE.1.P.B	Ssh2	0.321	0.491	-0.169
chr11-77893565-77894741	-2.808	0.002	TAL1.H12CORE.1.P.B_TAL1.H12CORE.1.P.B	Ssh2	0.321	0.491	-0.169
chr11-77964537-77966174	-3.23	0.001	TAL1.H12CORE.1.P.B_TAL1.H12CORE.1.P.B	Ssh2	0.321	0.491	-0.169
chr11-77964537-77966174	-3.23	0.001	TAL1.H12CORE.1.P.B_TAL1.H12CORE.1.P.B	Ssh2	0.321	0.491	-0.169
chr7-28309516-28310114	-2.37	0.009	TAL1.H12CORE.1.P.B_TAL1.H12CORE.1.P.B	Nfkbib	0.292	0.461	-0.169
chr7-28309516-28310114	-2.37	0.009	TAL1.H12CORE.1.P.B_TAL1.H12CORE.1.P.B	Nfkbib	0.292	0.461	-0.169
chr7-30532717-30533299	-2.332	0.01	TAL1.H12CORE.1.P.B_TAL1.H12CORE.1.P.B	Nfkbib	0.292	0.461	-0.169
chr7-30532717-30533299	-2.332	0.01	TAL1.H12CORE.1.P.B_TAL1.H12CORE.1.P.B	Nfkbib	0.292	0.461	-0.169
chr7-112883052-112884487	4.612	0	TAL1.H12CORE.1.P.B_TAL1.H12CORE.1.P.B	Insc	0.025	0.193	-0.168
chr7-112883052-112884487	4.612	0	TAL1.H12CORE.2.P.B_TAL1.H12CORE.2.P.B	Insc	0.025	0.193	-0.168
chr7-112883052-112884487	4.612	0	TAL1.H12CORE.2.P.B_TAL1.H12CORE.2.P.B	Insc	0.025	0.193	-0.168
chr7-112883052-112884487	4.612	0	TAL1.H12CORE.2.P.B_TAL1.H12CORE.2.P.B	Insc	0.025	0.193	-0.168
chr7-112883052-112884487	4.612	0	TAL1.H12CORE.1.P.B_TAL1.H12CORE.1.P.B	Insc	0.025	0.193	-0.168
chr7-112883052-112884487	4.612	0	TAL1.H12CORE.2.P.B_TAL1.H12CORE.2.P.B	Insc	0.025	0.193	-0.168
chr7-112883052-112884487	4.612	0	TAL1.H12CORE.2.P.B_TAL1.H12CORE.2.P.B	Insc	0.025	0.193	-0.168
chr7-112883052-112884487	4.612	0	TAL1.H12CORE.2.P.B_TAL1.H12CORE.2.P.B	Insc	0.025	0.193	-0.168
chr19-5740703-5742696	-3.001	0.001	TAL1.H12CORE.2.P.B_TAL1.H12CORE.2.P.B	Snx32	0.151	0.318	-0.167
chr19-5740703-5742696	-3.001	0.001	TAL1.H12CORE.2.P.B_TAL1.H12CORE.2.P.B	Snx32	0.151	0.318	-0.167
chr7-126949034-126951149	2.697	0.003	TAL1.H12CORE.2.P.B_TAL1.H12CORE.2.P.B	Coro1a	0.441	0.608	-0.167
chr7-126949034-126951149	2.697	0.003	TAL1.H12CORE.2.P.B_TAL1.H12CORE.2.P.B	Coro1a	0.441	0.608	-0.167
chr1-75445085-75447030	2.527	0.006	TAL1.H12CORE.0.P.B_TAL1.H12CORE.0.P.B	Gmppa	0.216	0.381	-0.165
chr1-75445085-75447030	2.527	0.006	TAL1.H12CORE.1.P.B_TAL1.H12CORE.1.P.B	Gmppa	0.216	0.381	-0.165
chr1-75445085-75447030	2.527	0.006	TAL1.H12CORE.1.P.B_TAL1.H12CORE.1.P.B	Gmppa	0.216	0.381	-0.165
chr1-75445085-75447030	2.527	0.006	TAL1.H12CORE.2.P.B_TAL1.H12CORE.2.P.B	Gmppa	0.216	0.381	-0.165
chr1-75445085-75447030	2.527	0.006	TAL1.H12CORE.0.P.B_TAL1.H12CORE.0.P.B	Gmppa	0.216	0.381	-0.165
chr1-75445085-75447030	2.527	0.006	TAL1.H12CORE.1.P.B_TAL1.H12CORE.1.P.B	Gmppa	0.216	0.381	-0.165
chr1-75445085-75447030	2.527	0.006	TAL1.H12CORE.1.P.B_TAL1.H12CORE.1.P.B	Gmppa	0.216	0.381	-0.165
chr1-75445085-75447030	2.527	0.006	TAL1.H12CORE.2.P.B_TAL1.H12CORE.2.P.B	Gmppa	0.216	0.381	-0.165
chr7-19092268-19096048	3.46	0	TAL1.H12CORE.1.P.B_TAL1.H12CORE.1.P.B	Trappc6a	0.253	0.417	-0.164
chr7-19092268-19096048	3.46	0	TAL1.H12CORE.1.P.B_TAL1.H12CORE.1.P.B	Trappc6a	0.253	0.417	-0.164
chr7-19092268-19096048	3.46	0	TAL1.H12CORE.2.P.B_TAL1.H12CORE.2.P.B	Trappc6a	0.253	0.417	-0.164
chr7-19092268-19096048	3.46	0	TAL1.H12CORE.1.P.B_TAL1.H12CORE.1.P.B	Trappc6a	0.253	0.417	-0.164
chr7-19092268-19096048	3.46	0	TAL1.H12CORE.1.P.B_TAL1.H12CORE.1.P.B	Trappc6a	0.253	0.417	-0.164
chr7-19092268-19096048	3.46	0	TAL1.H12CORE.2.P.B_TAL1.H12CORE.2.P.B	Trappc6a	0.253	0.417	-0.164
chr8-120184274-120186775	-2.59	0.005	TAL1.H12CORE.1.P.B_TAL1.H12CORE.1.P.B	Cotl1	0.671	0.832	-0.161
chr8-120184274-120186775	-2.59	0.005	TAL1.H12CORE.2.P.B_TAL1.H12CORE.2.P.B	Cotl1	0.671	0.832	-0.161
chr8-120184274-120186775	-2.59	0.005	TAL1.H12CORE.2.P.B_TAL1.H12CORE.2.P.B	Cotl1	0.671	0.832	-0.161
chr8-120184274-120186775	-2.59	0.005	TAL1.H12CORE.1.P.B_TAL1.H12CORE.1.P.B	Cotl1	0.671	0.832	-0.161
chr8-120184274-120186775	-2.59	0.005	TAL1.H12CORE.2.P.B_TAL1.H12CORE.2.P.B	Cotl1	0.671	0.832	-0.161
chr8-120184274-120186775	-2.59	0.005	TAL1.H12CORE.2.P.B_TAL1.H12CORE.2.P.B	Cotl1	0.671	0.832	-0.161
chr8-120416117-120417412	-2.978	0.001	TAL1.H12CORE.2.P.B_TAL1.H12CORE.2.P.B	Cotl1	0.671	0.832	-0.161
chr8-120416117-120417412	-2.978	0.001	TAL1.H12CORE.2.P.B_TAL1.H12CORE.2.P.B	Cotl1	0.671	0.832	-0.161
chr8-120416117-120417412	-2.978	0.001	TAL1.H12CORE.2.P.B_TAL1.H12CORE.2.P.B	Cotl1	0.671	0.832	-0.161
chr8-120416117-120417412	-2.978	0.001	TAL1.H12CORE.2.P.B_TAL1.H12CORE.2.P.B	Cotl1	0.671	0.832	-0.161
chr8-120416117-120417412	-2.978	0.001	TAL1.H12CORE.2.P.B_TAL1.H12CORE.2.P.B	Cotl1	0.671	0.832	-0.161
chr8-120416117-120417412	-2.978	0.001	TAL1.H12CORE.2.P.B_TAL1.H12CORE.2.P.B	Cotl1	0.671	0.832	-0.161
chr8-120416117-120417412	-2.978	0.001	TAL1.H12CORE.2.P.B_TAL1.H12CORE.2.P.B	Cotl1	0.671	0.832	-0.161
chr8-120416117-120417412	-2.978	0.001	TAL1.H12CORE.2.P.B_TAL1.H12CORE.2.P.B	Cotl1	0.671	0.832	-0.161
chr8-120520607-120522014	-3.876	0	TAL1.H12CORE.2.P.B_TAL1.H12CORE.2.P.B	Cotl1	0.671	0.832	-0.161
chr8-120520607-120522014	-3.876	0	TAL1.H12CORE.2.P.B_TAL1.H12CORE.2.P.B	Cotl1	0.671	0.832	-0.161
chr8-120520607-120522014	-3.876	0	TAL1.H12CORE.2.P.B_TAL1.H12CORE.2.P.B	Cotl1	0.671	0.832	-0.161
chr8-120520607-120522014	-3.876	0	TAL1.H12CORE.2.P.B_TAL1.H12CORE.2.P.B	Cotl1	0.671	0.832	-0.161
chr8-120520607-120522014	-3.876	0	TAL1.H12CORE.2.P.B_TAL1.H12CORE.2.P.B	Cotl1	0.671	0.832	-0.161
chr8-120520607-120522014	-3.876	0	TAL1.H12CORE.2.P.B_TAL1.H12CORE.2.P.B	Cotl1	0.671	0.832	-0.161
chr19-6389184-6390541	2.377	0.009	TAL1.H12CORE.1.P.B_TAL1.H12CORE.1.P.B	Arl2	0.686	0.847	-0.161
chr19-6389184-6390541	2.377	0.009	TAL1.H12CORE.1.P.B_TAL1.H12CORE.1.P.B	Arl2	0.686	0.847	-0.161
chr5-101425518-101427189	-3.55	0	TAL1.H12CORE.1.P.B_TAL1.H12CORE.1.P.B	Wdfy3	0.31	0.471	-0.161
chr5-101425518-101427189	-3.55	0	TAL1.H12CORE.1.P.B_TAL1.H12CORE.1.P.B	Wdfy3	0.31	0.471	-0.161
chr5-101425518-101427189	-3.55	0	TAL1.H12CORE.2.P.B_TAL1.H12CORE.2.P.B	Wdfy3	0.31	0.471	-0.161
chr5-101425518-101427189	-3.55	0	TAL1.H12CORE.1.P.B_TAL1.H12CORE.1.P.B	Wdfy3	0.31	0.471	-0.161
chr5-101425518-101427189	-3.55	0	TAL1.H12CORE.1.P.B_TAL1.H12CORE.1.P.B	Wdfy3	0.31	0.471	-0.161
chr5-101425518-101427189	-3.55	0	TAL1.H12CORE.2.P.B_TAL1.H12CORE.2.P.B	Wdfy3	0.31	0.471	-0.161
chr5-101520559-101521697	-3.259	0.001	TAL1.H12CORE.1.P.B_TAL1.H12CORE.1.P.B	Wdfy3	0.31	0.471	-0.161
chr5-101520559-101521697	-3.259	0.001	TAL1.H12CORE.2.P.B_TAL1.H12CORE.2.P.B	Wdfy3	0.31	0.471	-0.161
chr5-101520559-101521697	-3.259	0.001	TAL1.H12CORE.1.P.B_TAL1.H12CORE.1.P.B	Wdfy3	0.31	0.471	-0.161
chr5-101520559-101521697	-3.259	0.001	TAL1.H12CORE.2.P.B_TAL1.H12CORE.2.P.B	Wdfy3	0.31	0.471	-0.161
chr5-103160329-103162076	-2.959	0.002	TAL1.H12CORE.2.P.B_TAL1.H12CORE.2.P.B	Wdfy3	0.31	0.471	-0.161
chr5-103160329-103162076	-2.959	0.002	TAL1.H12CORE.2.P.B_TAL1.H12CORE.2.P.B	Wdfy3	0.31	0.471	-0.161
chr9-121666851-121668067	3.767	0	TAL1.H12CORE.1.P.B_TAL1.H12CORE.1.P.B	Nktr	1.405	1.565	-0.16
chr9-121666851-121668067	3.767	0	TAL1.H12CORE.2.P.B_TAL1.H12CORE.2.P.B	Nktr	1.405	1.565	-0.16
chr9-121666851-121668067	3.767	0	TAL1.H12CORE.1.P.B_TAL1.H12CORE.1.P.B	Nktr	1.405	1.565	-0.16
chr9-121666851-121668067	3.767	0	TAL1.H12CORE.2.P.B_TAL1.H12CORE.2.P.B	Nktr	1.405	1.565	-0.16
chr4-124671700-124673439	-2.804	0.003	TAL1.H12CORE.1.P.B_TAL1.H12CORE.1.P.B	Cap1	0.598	0.757	-0.159
chr4-124671700-124673439	-2.804	0.003	TAL1.H12CORE.1.P.B_TAL1.H12CORE.1.P.B	Cap1	0.598	0.757	-0.159
chr16-21338930-21340519	-3.849	0	TAL1.H12CORE.2.P.B_TAL1.H12CORE.2.P.B	Map3k13	0.155	0.313	-0.159
chr16-21338930-21340519	-3.849	0	TAL1.H12CORE.2.P.B_TAL1.H12CORE.2.P.B	Map3k13	0.155	0.313	-0.159
chr7-28309516-28310114	4.685	0	TAL1.H12CORE.1.P.B_TAL1.H12CORE.1.P.B	Ppp1r14a	0.237	0.394	-0.157
chr7-28309516-28310114	4.685	0	TAL1.H12CORE.1.P.B_TAL1.H12CORE.1.P.B	Ppp1r14a	0.237	0.394	-0.157
chr7-29290969-29291467	3.04	0.001	TAL1.H12CORE.1.P.B_TAL1.H12CORE.1.P.B	Ppp1r14a	0.237	0.394	-0.157
chr7-29290969-29291467	3.04	0.001	TAL1.H12CORE.2.P.B_TAL1.H12CORE.2.P.B	Ppp1r14a	0.237	0.394	-0.157
chr7-29290969-29291467	3.04	0.001	TAL1.H12CORE.1.P.B_TAL1.H12CORE.1.P.B	Ppp1r14a	0.237	0.394	-0.157
chr7-29290969-29291467	3.04	0.001	TAL1.H12CORE.2.P.B_TAL1.H12CORE.2.P.B	Ppp1r14a	0.237	0.394	-0.157
chr2-164967435-164968904	2.848	0.002	TAL1.H12CORE.2.P.B_TAL1.H12CORE.2.P.B	Pcif1	0.605	0.76	-0.155
chr2-164967435-164968904	2.848	0.002	TAL1.H12CORE.2.P.B_TAL1.H12CORE.2.P.B	Pcif1	0.605	0.76	-0.155
chr2-165131064-165131825	2.385	0.009	TAL1.H12CORE.1.P.B_TAL1.H12CORE.1.P.B	Pcif1	0.605	0.76	-0.155
chr2-165131064-165131825	2.385	0.009	TAL1.H12CORE.2.P.B_TAL1.H12CORE.2.P.B	Pcif1	0.605	0.76	-0.155
chr2-165131064-165131825	2.385	0.009	TAL1.H12CORE.1.P.B_TAL1.H12CORE.1.P.B	Pcif1	0.605	0.76	-0.155
chr2-165131064-165131825	2.385	0.009	TAL1.H12CORE.2.P.B_TAL1.H12CORE.2.P.B	Pcif1	0.605	0.76	-0.155
chr5-114263617-114264621	7.075	0	TAL1.H12CORE.1.P.B_TAL1.H12CORE.1.P.B	Coro1c	0.644	0.798	-0.154
chr5-114263617-114264621	7.075	0	TAL1.H12CORE.2.P.B_TAL1.H12CORE.2.P.B	Coro1c	0.644	0.798	-0.154
chr5-114263617-114264621	7.075	0	TAL1.H12CORE.1.P.B_TAL1.H12CORE.1.P.B	Coro1c	0.644	0.798	-0.154
chr5-114263617-114264621	7.075	0	TAL1.H12CORE.2.P.B_TAL1.H12CORE.2.P.B	Coro1c	0.644	0.798	-0.154
chr5-114590119-114591611	3.901	0	TAL1.H12CORE.0.P.B_TAL1.H12CORE.0.P.B	Coro1c	0.644	0.798	-0.154
chr5-114590119-114591611	3.901	0	TAL1.H12CORE.1.P.B_TAL1.H12CORE.1.P.B	Coro1c	0.644	0.798	-0.154
chr5-114590119-114591611	3.901	0	TAL1.H12CORE.1.P.B_TAL1.H12CORE.1.P.B	Coro1c	0.644	0.798	-0.154
chr5-114590119-114591611	3.901	0	TAL1.H12CORE.0.P.B_TAL1.H12CORE.0.P.B	Coro1c	0.644	0.798	-0.154
chr5-114590119-114591611	3.901	0	TAL1.H12CORE.1.P.B_TAL1.H12CORE.1.P.B	Coro1c	0.644	0.798	-0.154
chr5-114590119-114591611	3.901	0	TAL1.H12CORE.1.P.B_TAL1.H12CORE.1.P.B	Coro1c	0.644	0.798	-0.154
chr7-28300985-28302540	-3.819	0	TAL1.H12CORE.1.P.B_TAL1.H12CORE.1.P.B	Capns1	0.57	0.723	-0.153
chr7-28300985-28302540	-3.819	0	TAL1.H12CORE.1.P.B_TAL1.H12CORE.1.P.B	Capns1	0.57	0.723	-0.153
chr7-28300985-28302540	-3.819	0	TAL1.H12CORE.2.P.B_TAL1.H12CORE.2.P.B	Capns1	0.57	0.723	-0.153
chr7-28300985-28302540	-3.819	0	TAL1.H12CORE.2.P.B_TAL1.H12CORE.2.P.B	Capns1	0.57	0.723	-0.153
chr7-28300985-28302540	-3.819	0	TAL1.H12CORE.1.P.B_TAL1.H12CORE.1.P.B	Capns1	0.57	0.723	-0.153
chr7-28300985-28302540	-3.819	0	TAL1.H12CORE.1.P.B_TAL1.H12CORE.1.P.B	Capns1	0.57	0.723	-0.153
chr7-28300985-28302540	-3.819	0	TAL1.H12CORE.2.P.B_TAL1.H12CORE.2.P.B	Capns1	0.57	0.723	-0.153
chr7-28300985-28302540	-3.819	0	TAL1.H12CORE.2.P.B_TAL1.H12CORE.2.P.B	Capns1	0.57	0.723	-0.153
chr7-28309516-28310114	-5.173	0	TAL1.H12CORE.1.P.B_TAL1.H12CORE.1.P.B	Capns1	0.57	0.723	-0.153
chr7-28309516-28310114	-5.173	0	TAL1.H12CORE.1.P.B_TAL1.H12CORE.1.P.B	Capns1	0.57	0.723	-0.153
chr7-29290969-29291467	-3.268	0.001	TAL1.H12CORE.1.P.B_TAL1.H12CORE.1.P.B	Capns1	0.57	0.723	-0.153
chr7-29290969-29291467	-3.268	0.001	TAL1.H12CORE.2.P.B_TAL1.H12CORE.2.P.B	Capns1	0.57	0.723	-0.153
chr7-29290969-29291467	-3.268	0.001	TAL1.H12CORE.1.P.B_TAL1.H12CORE.1.P.B	Capns1	0.57	0.723	-0.153
chr7-29290969-29291467	-3.268	0.001	TAL1.H12CORE.2.P.B_TAL1.H12CORE.2.P.B	Capns1	0.57	0.723	-0.153
chr8-84729810-84732148	2.53	0.006	TAL1.H12CORE.0.P.B_TAL1.H12CORE.0.P.B	Ier2	0.922	1.075	-0.153
chr8-84729810-84732148	2.53	0.006	TAL1.H12CORE.0.P.B_TAL1.H12CORE.0.P.B	Ier2	0.922	1.075	-0.153
chr8-84809138-84809960	2.453	0.007	TAL1.H12CORE.2.P.B_TAL1.H12CORE.2.P.B	Ier2	0.922	1.075	-0.153
chr8-84814016-84815876	2.86	0.002	TAL1.H12CORE.1.P.B_TAL1.H12CORE.1.P.B	Ier2	0.922	1.075	-0.153
chr8-84814016-84815876	2.86	0.002	TAL1.H12CORE.1.P.B_TAL1.H12CORE.1.P.B	Ier2	0.922	1.075	-0.153
chr8-84814016-84815876	2.86	0.002	TAL1.H12CORE.2.P.B_TAL1.H12CORE.2.P.B	Ier2	0.922	1.075	-0.153
chr8-84814016-84815876	2.86	0.002	TAL1.H12CORE.2.P.B_TAL1.H12CORE.2.P.B	Ier2	0.922	1.075	-0.153
chr7-79524703-79526621	2.495	0.006	TAL1.H12CORE.1.P.B_TAL1.H12CORE.1.P.B	Idh2	1.005	1.158	-0.153
chr7-79524703-79526621	2.495	0.006	TAL1.H12CORE.2.P.B_TAL1.H12CORE.2.P.B	Idh2	1.005	1.158	-0.153
chr7-79524703-79526621	2.495	0.006	TAL1.H12CORE.2.P.B_TAL1.H12CORE.2.P.B	Idh2	1.005	1.158	-0.153
chr7-79524703-79526621	2.495	0.006	TAL1.H12CORE.1.P.B_TAL1.H12CORE.1.P.B	Idh2	1.005	1.158	-0.153
chr7-79524703-79526621	2.495	0.006	TAL1.H12CORE.2.P.B_TAL1.H12CORE.2.P.B	Idh2	1.005	1.158	-0.153
chr7-79524703-79526621	2.495	0.006	TAL1.H12CORE.2.P.B_TAL1.H12CORE.2.P.B	Idh2	1.005	1.158	-0.153
chr7-79531144-79532280	2.464	0.007	TAL1.H12CORE.1.P.B_TAL1.H12CORE.1.P.B	Idh2	1.005	1.158	-0.153
chr7-79531144-79532280	2.464	0.007	TAL1.H12CORE.1.P.B_TAL1.H12CORE.1.P.B	Idh2	1.005	1.158	-0.153
chr7-79576837-79579269	2.809	0.002	TAL1.H12CORE.1.P.B_TAL1.H12CORE.1.P.B	Idh2	1.005	1.158	-0.153
chr7-79576837-79579269	2.809	0.002	TAL1.H12CORE.1.P.B_TAL1.H12CORE.1.P.B	Idh2	1.005	1.158	-0.153
chr7-79576837-79579269	2.809	0.002	TAL1.H12CORE.2.P.B_TAL1.H12CORE.2.P.B	Idh2	1.005	1.158	-0.153
chr7-79576837-79579269	2.809	0.002	TAL1.H12CORE.1.P.B_TAL1.H12CORE.1.P.B	Idh2	1.005	1.158	-0.153
chr7-79576837-79579269	2.809	0.002	TAL1.H12CORE.1.P.B_TAL1.H12CORE.1.P.B	Idh2	1.005	1.158	-0.153
chr7-79576837-79579269	2.809	0.002	TAL1.H12CORE.2.P.B_TAL1.H12CORE.2.P.B	Idh2	1.005	1.158	-0.153
chr15-81802035-81803269	-3.939	0	TAL1.H12CORE.1.P.B_TAL1.H12CORE.1.P.B	Ndufa6	1.798	1.951	-0.153
chr15-81802035-81803269	-3.939	0	TAL1.H12CORE.1.P.B_TAL1.H12CORE.1.P.B	Ndufa6	1.798	1.951	-0.153
chr15-81802035-81803269	-3.939	0	TAL1.H12CORE.1.P.B_TAL1.H12CORE.1.P.B	Ndufa6	1.798	1.951	-0.153
chr15-81802035-81803269	-3.939	0	TAL1.H12CORE.2.P.B_TAL1.H12CORE.2.P.B	Ndufa6	1.798	1.951	-0.153
chr15-81802035-81803269	-3.939	0	TAL1.H12CORE.1.P.B_TAL1.H12CORE.1.P.B	Ndufa6	1.798	1.951	-0.153
chr15-81802035-81803269	-3.939	0	TAL1.H12CORE.1.P.B_TAL1.H12CORE.1.P.B	Ndufa6	1.798	1.951	-0.153
chr15-81802035-81803269	-3.939	0	TAL1.H12CORE.1.P.B_TAL1.H12CORE.1.P.B	Ndufa6	1.798	1.951	-0.153
chr15-81802035-81803269	-3.939	0	TAL1.H12CORE.2.P.B_TAL1.H12CORE.2.P.B	Ndufa6	1.798	1.951	-0.153
chr11-101477142-101478295	3.018	0.001	TAL1.H12CORE.1.P.B_TAL1.H12CORE.1.P.B	Ubtf	0.72	0.873	-0.153
chr11-101477142-101478295	3.018	0.001	TAL1.H12CORE.2.P.B_TAL1.H12CORE.2.P.B	Ubtf	0.72	0.873	-0.153
chr11-101477142-101478295	3.018	0.001	TAL1.H12CORE.1.P.B_TAL1.H12CORE.1.P.B	Ubtf	0.72	0.873	-0.153
chr11-101477142-101478295	3.018	0.001	TAL1.H12CORE.2.P.B_TAL1.H12CORE.2.P.B	Ubtf	0.72	0.873	-0.153
chr2-25185352-25186665	-2.669	0.004	TAL1.H12CORE.2.P.B_TAL1.H12CORE.2.P.B	Gpsm1	0.789	0.942	-0.152
chr2-25185352-25186665	-2.669	0.004	TAL1.H12CORE.2.P.B_TAL1.H12CORE.2.P.B	Gpsm1	0.789	0.942	-0.152
chr2-26090657-26092549	-2.599	0.005	TAL1.H12CORE.1.P.B_TAL1.H12CORE.1.P.B	Gpsm1	0.789	0.942	-0.152
chr2-26090657-26092549	-2.599	0.005	TAL1.H12CORE.1.P.B_TAL1.H12CORE.1.P.B	Gpsm1	0.789	0.942	-0.152
chr2-26486498-26488060	-3.439	0	TAL1.H12CORE.2.P.B_TAL1.H12CORE.2.P.B	Gpsm1	0.789	0.942	-0.152
chr2-26486498-26488060	-3.439	0	TAL1.H12CORE.2.P.B_TAL1.H12CORE.2.P.B	Gpsm1	0.789	0.942	-0.152
chr2-26501583-26504134	-4.456	0	TAL1.H12CORE.2.P.B_TAL1.H12CORE.2.P.B	Gpsm1	0.789	0.942	-0.152
chr2-26501583-26504134	-4.456	0	TAL1.H12CORE.2.P.B_TAL1.H12CORE.2.P.B	Gpsm1	0.789	0.942	-0.152
chr2-30721694-30723425	-2.416	0.008	TAL1.H12CORE.0.P.B_TAL1.H12CORE.0.P.B	Ntmt1	1.075	1.227	-0.152
chr2-30721694-30723425	-2.416	0.008	TAL1.H12CORE.0.P.B_TAL1.H12CORE.0.P.B	Ntmt1	1.075	1.227	-0.152
chr11-120261084-120262893	-4.008	0	TAL1.H12CORE.2.P.B_TAL1.H12CORE.2.P.B	Rac3	0.395	0.547	-0.152
chr11-120261084-120262893	-4.008	0	TAL1.H12CORE.2.P.B_TAL1.H12CORE.2.P.B	Rac3	0.395	0.547	-0.152
chr4-43043784-43044423	-2.51	0.006	TAL1.H12CORE.1.P.B_TAL1.H12CORE.1.P.B	Creb3	0.3	0.451	-0.151
chr4-43043784-43044423	-2.51	0.006	TAL1.H12CORE.1.P.B_TAL1.H12CORE.1.P.B	Creb3	0.3	0.451	-0.151
chr4-43043784-43044423	-2.51	0.006	TAL1.H12CORE.1.P.B_TAL1.H12CORE.1.P.B	Creb3	0.3	0.451	-0.151
chr4-43043784-43044423	-2.51	0.006	TAL1.H12CORE.1.P.B_TAL1.H12CORE.1.P.B	Creb3	0.3	0.451	-0.151
chr4-117644634-117647845	3.077	0.001	TAL1.H12CORE.2.P.B_TAL1.H12CORE.2.P.B	Eri3	0.474	0.625	-0.151
chr4-117644634-117647845	3.077	0.001	TAL1.H12CORE.2.P.B_TAL1.H12CORE.2.P.B	Eri3	0.474	0.625	-0.151
chr8-70656073-70657064	-4.184	0	TAL1.H12CORE.1.P.B_TAL1.H12CORE.1.P.B	Isyna1	0.42	0.57	-0.15
chr8-70656073-70657064	-4.184	0	TAL1.H12CORE.1.P.B_TAL1.H12CORE.1.P.B	Isyna1	0.42	0.57	-0.15
chr11-69935164-69936259	2.494	0.006	TAL1.H12CORE.2.P.B_TAL1.H12CORE.2.P.B	Dlg4	0.651	0.801	-0.15
chr11-69935164-69936259	2.494	0.006	TAL1.H12CORE.2.P.B_TAL1.H12CORE.2.P.B	Dlg4	0.651	0.801	-0.15
chr11-69935164-69936259	2.494	0.006	TAL1.H12CORE.2.P.B_TAL1.H12CORE.2.P.B	Dlg4	0.651	0.801	-0.15
chr11-69935164-69936259	2.494	0.006	TAL1.H12CORE.2.P.B_TAL1.H12CORE.2.P.B	Dlg4	0.651	0.801	-0.15
chr6-54428836-54430153	2.51	0.006	TAL1.H12CORE.1.P.B_TAL1.H12CORE.1.P.B	Chn2	0.106	0.255	-0.149
chr6-54428836-54430153	2.51	0.006	TAL1.H12CORE.2.P.B_TAL1.H12CORE.2.P.B	Chn2	0.106	0.255	-0.149
chr6-54428836-54430153	2.51	0.006	TAL1.H12CORE.1.P.B_TAL1.H12CORE.1.P.B	Chn2	0.106	0.255	-0.149
chr6-54428836-54430153	2.51	0.006	TAL1.H12CORE.2.P.B_TAL1.H12CORE.2.P.B	Chn2	0.106	0.255	-0.149
chr18-13397026-13398731	-2.389	0.008	TAL1.H12CORE.1.P.B_TAL1.H12CORE.1.P.B	Zfp521	0.076	0.224	-0.148
chr18-13397026-13398731	-2.389	0.008	TAL1.H12CORE.2.P.B_TAL1.H12CORE.2.P.B	Zfp521	0.076	0.224	-0.148
chr18-13397026-13398731	-2.389	0.008	TAL1.H12CORE.1.P.B_TAL1.H12CORE.1.P.B	Zfp521	0.076	0.224	-0.148
chr18-13397026-13398731	-2.389	0.008	TAL1.H12CORE.2.P.B_TAL1.H12CORE.2.P.B	Zfp521	0.076	0.224	-0.148
chr6-93911846-93913880	3.312	0	TAL1.H12CORE.1.P.B_TAL1.H12CORE.1.P.B	Magi1	0.34	0.487	-0.147
chr6-93911846-93913880	3.312	0	TAL1.H12CORE.1.P.B_TAL1.H12CORE.1.P.B	Magi1	0.34	0.487	-0.147
chr2-31636217-31637206	-2.972	0.001	TAL1.H12CORE.1.P.B_TAL1.H12CORE.1.P.B	Stxbp1	0.342	0.489	-0.147
chr2-31636217-31637206	-2.972	0.001	TAL1.H12CORE.1.P.B_TAL1.H12CORE.1.P.B	Stxbp1	0.342	0.489	-0.147
chr2-32322474-32323716	3.261	0.001	TAL1.H12CORE.2.P.B_TAL1.H12CORE.2.P.B	Stxbp1	0.342	0.489	-0.147
chr2-32322474-32323716	3.261	0.001	TAL1.H12CORE.2.P.B_TAL1.H12CORE.2.P.B	Stxbp1	0.342	0.489	-0.147
chr2-32740700-32742637	2.854	0.002	TAL1.H12CORE.1.P.B_TAL1.H12CORE.1.P.B	Stxbp1	0.342	0.489	-0.147
chr2-32740700-32742637	2.854	0.002	TAL1.H12CORE.1.P.B_TAL1.H12CORE.1.P.B	Stxbp1	0.342	0.489	-0.147
chr1-75445085-75447030	2.557	0.005	TAL1.H12CORE.0.P.B_TAL1.H12CORE.0.P.B	Speg	0.115	0.262	-0.147
chr1-75445085-75447030	2.557	0.005	TAL1.H12CORE.1.P.B_TAL1.H12CORE.1.P.B	Speg	0.115	0.262	-0.147
chr1-75445085-75447030	2.557	0.005	TAL1.H12CORE.1.P.B_TAL1.H12CORE.1.P.B	Speg	0.115	0.262	-0.147
chr1-75445085-75447030	2.557	0.005	TAL1.H12CORE.2.P.B_TAL1.H12CORE.2.P.B	Speg	0.115	0.262	-0.147
chr1-75445085-75447030	2.557	0.005	TAL1.H12CORE.0.P.B_TAL1.H12CORE.0.P.B	Speg	0.115	0.262	-0.147
chr1-75445085-75447030	2.557	0.005	TAL1.H12CORE.1.P.B_TAL1.H12CORE.1.P.B	Speg	0.115	0.262	-0.147
chr1-75445085-75447030	2.557	0.005	TAL1.H12CORE.1.P.B_TAL1.H12CORE.1.P.B	Speg	0.115	0.262	-0.147
chr1-75445085-75447030	2.557	0.005	TAL1.H12CORE.2.P.B_TAL1.H12CORE.2.P.B	Speg	0.115	0.262	-0.147
chr2-118761430-118763075	-3.826	0	TAL1.H12CORE.1.P.B_TAL1.H12CORE.1.P.B	Disp2	0.067	0.212	-0.146
chr2-118761430-118763075	-3.826	0	TAL1.H12CORE.2.P.B_TAL1.H12CORE.2.P.B	Disp2	0.067	0.212	-0.146
chr2-118761430-118763075	-3.826	0	TAL1.H12CORE.1.P.B_TAL1.H12CORE.1.P.B	Disp2	0.067	0.212	-0.146
chr2-118761430-118763075	-3.826	0	TAL1.H12CORE.2.P.B_TAL1.H12CORE.2.P.B	Disp2	0.067	0.212	-0.146
chr4-124484553-124486586	2.328	0.01	TAL1.H12CORE.1.P.B_TAL1.H12CORE.1.P.B	Utp11	0.698	0.843	-0.145
chr4-124484553-124486586	2.328	0.01	TAL1.H12CORE.2.P.B_TAL1.H12CORE.2.P.B	Utp11	0.698	0.843	-0.145
chr4-124484553-124486586	2.328	0.01	TAL1.H12CORE.2.P.B_TAL1.H12CORE.2.P.B	Utp11	0.698	0.843	-0.145
chr4-124484553-124486586	2.328	0.01	TAL1.H12CORE.2.P.B_TAL1.H12CORE.2.P.B	Utp11	0.698	0.843	-0.145
chr4-124484553-124486586	2.328	0.01	TAL1.H12CORE.1.P.B_TAL1.H12CORE.1.P.B	Utp11	0.698	0.843	-0.145
chr4-124484553-124486586	2.328	0.01	TAL1.H12CORE.2.P.B_TAL1.H12CORE.2.P.B	Utp11	0.698	0.843	-0.145
chr4-124484553-124486586	2.328	0.01	TAL1.H12CORE.2.P.B_TAL1.H12CORE.2.P.B	Utp11	0.698	0.843	-0.145
chr4-124484553-124486586	2.328	0.01	TAL1.H12CORE.2.P.B_TAL1.H12CORE.2.P.B	Utp11	0.698	0.843	-0.145
chr4-126465616-126466272	3.24	0.001	TAL1.H12CORE.1.P.B_TAL1.H12CORE.1.P.B	Utp11	0.698	0.843	-0.145
chr4-126465616-126466272	3.24	0.001	TAL1.H12CORE.1.P.B_TAL1.H12CORE.1.P.B	Utp11	0.698	0.843	-0.145
chr5-114263617-114264621	-2.66	0.004	TAL1.H12CORE.1.P.B_TAL1.H12CORE.1.P.B	2210016L21Rik	0.648	0.793	-0.145
chr5-114263617-114264621	-2.66	0.004	TAL1.H12CORE.2.P.B_TAL1.H12CORE.2.P.B	2210016L21Rik	0.648	0.793	-0.145
chr5-114263617-114264621	-2.66	0.004	TAL1.H12CORE.1.P.B_TAL1.H12CORE.1.P.B	2210016L21Rik	0.648	0.793	-0.145
chr5-114263617-114264621	-2.66	0.004	TAL1.H12CORE.2.P.B_TAL1.H12CORE.2.P.B	2210016L21Rik	0.648	0.793	-0.145
chr5-115730799-115733122	2.395	0.008	TAL1.H12CORE.1.P.B_TAL1.H12CORE.1.P.B	2210016L21Rik	0.648	0.793	-0.145
chr5-115730799-115733122	2.395	0.008	TAL1.H12CORE.1.P.B_TAL1.H12CORE.1.P.B	2210016L21Rik	0.648	0.793	-0.145
chr19-41745589-41746907	-3.775	0	TAL1.H12CORE.2.P.B_TAL1.H12CORE.2.P.B	Frat2	0.416	0.559	-0.144
chr19-41934186-41934470	-3.208	0.001	TAL1.H12CORE.1.P.B_TAL1.H12CORE.1.P.B	Frat2	0.416	0.559	-0.144
chr9-106664112-106665278	-2.6	0.005	TAL1.H12CORE.1.P.B_TAL1.H12CORE.1.P.B	Manf	1.493	1.636	-0.143
chr9-106664112-106665278	-2.6	0.005	TAL1.H12CORE.2.P.B_TAL1.H12CORE.2.P.B	Manf	1.493	1.636	-0.143
chr9-106664112-106665278	-2.6	0.005	TAL1.H12CORE.2.P.B_TAL1.H12CORE.2.P.B	Manf	1.493	1.636	-0.143
chr9-106664112-106665278	-2.6	0.005	TAL1.H12CORE.1.P.B_TAL1.H12CORE.1.P.B	Manf	1.493	1.636	-0.143
chr9-106664112-106665278	-2.6	0.005	TAL1.H12CORE.2.P.B_TAL1.H12CORE.2.P.B	Manf	1.493	1.636	-0.143
chr9-106664112-106665278	-2.6	0.005	TAL1.H12CORE.2.P.B_TAL1.H12CORE.2.P.B	Manf	1.493	1.636	-0.143
chr5-98165652-98166466	3.594	0	TAL1.H12CORE.2.P.B_TAL1.H12CORE.2.P.B	Prdm8	0.214	0.357	-0.143
chr5-98165652-98166466	3.594	0	TAL1.H12CORE.2.P.B_TAL1.H12CORE.2.P.B	Prdm8	0.214	0.357	-0.143
chr5-98165652-98166466	3.594	0	TAL1.H12CORE.2.P.B_TAL1.H12CORE.2.P.B	Prdm8	0.214	0.357	-0.143
chr5-98165652-98166466	3.594	0	TAL1.H12CORE.2.P.B_TAL1.H12CORE.2.P.B	Prdm8	0.214	0.357	-0.143
chr5-98166799-98167815	5.216	0	TAL1.H12CORE.1.P.B_TAL1.H12CORE.1.P.B	Prdm8	0.214	0.357	-0.143
chr5-98166799-98167815	5.216	0	TAL1.H12CORE.2.P.B_TAL1.H12CORE.2.P.B	Prdm8	0.214	0.357	-0.143
chr5-98166799-98167815	5.216	0	TAL1.H12CORE.1.P.B_TAL1.H12CORE.1.P.B	Prdm8	0.214	0.357	-0.143
chr5-98166799-98167815	5.216	0	TAL1.H12CORE.2.P.B_TAL1.H12CORE.2.P.B	Prdm8	0.214	0.357	-0.143
chr5-98169369-98170234	3.936	0	TAL1.H12CORE.0.P.B_TAL1.H12CORE.0.P.B	Prdm8	0.214	0.357	-0.143
chr5-98169369-98170234	3.936	0	TAL1.H12CORE.1.P.B_TAL1.H12CORE.1.P.B	Prdm8	0.214	0.357	-0.143
chr5-98169369-98170234	3.936	0	TAL1.H12CORE.2.P.B_TAL1.H12CORE.2.P.B	Prdm8	0.214	0.357	-0.143
chr5-98169369-98170234	3.936	0	TAL1.H12CORE.0.P.B_TAL1.H12CORE.0.P.B	Prdm8	0.214	0.357	-0.143
chr5-98169369-98170234	3.936	0	TAL1.H12CORE.1.P.B_TAL1.H12CORE.1.P.B	Prdm8	0.214	0.357	-0.143
chr5-98169369-98170234	3.936	0	TAL1.H12CORE.2.P.B_TAL1.H12CORE.2.P.B	Prdm8	0.214	0.357	-0.143
chr14-116924830-116927556	2.756	0.003	TAL1.H12CORE.0.P.B_TAL1.H12CORE.0.P.B	Gpc6	0.063	0.206	-0.143
chr14-116924830-116927556	2.756	0.003	TAL1.H12CORE.1.P.B_TAL1.H12CORE.1.P.B	Gpc6	0.063	0.206	-0.143
chr14-116924830-116927556	2.756	0.003	TAL1.H12CORE.1.P.B_TAL1.H12CORE.1.P.B	Gpc6	0.063	0.206	-0.143
chr14-116924830-116927556	2.756	0.003	TAL1.H12CORE.0.P.B_TAL1.H12CORE.0.P.B	Gpc6	0.063	0.206	-0.143
chr14-116924830-116927556	2.756	0.003	TAL1.H12CORE.1.P.B_TAL1.H12CORE.1.P.B	Gpc6	0.063	0.206	-0.143
chr14-116924830-116927556	2.756	0.003	TAL1.H12CORE.1.P.B_TAL1.H12CORE.1.P.B	Gpc6	0.063	0.206	-0.143
chr2-25182618-25183032	-2.616	0.004	TAL1.H12CORE.2.P.B_TAL1.H12CORE.2.P.B	Npdc1	1.579	1.721	-0.142
chr2-25182618-25183032	-2.616	0.004	TAL1.H12CORE.2.P.B_TAL1.H12CORE.2.P.B	Npdc1	1.579	1.721	-0.142
chr2-25185352-25186665	-2.727	0.003	TAL1.H12CORE.2.P.B_TAL1.H12CORE.2.P.B	Npdc1	1.579	1.721	-0.142
chr2-25185352-25186665	-2.727	0.003	TAL1.H12CORE.2.P.B_TAL1.H12CORE.2.P.B	Npdc1	1.579	1.721	-0.142
chr2-26486498-26488060	-3.462	0	TAL1.H12CORE.2.P.B_TAL1.H12CORE.2.P.B	Npdc1	1.579	1.721	-0.142
chr2-26486498-26488060	-3.462	0	TAL1.H12CORE.2.P.B_TAL1.H12CORE.2.P.B	Npdc1	1.579	1.721	-0.142
chr2-26488749-26489161	-2.959	0.002	TAL1.H12CORE.1.P.B_TAL1.H12CORE.1.P.B	Npdc1	1.579	1.721	-0.142
chr2-26488749-26489161	-2.959	0.002	TAL1.H12CORE.1.P.B_TAL1.H12CORE.1.P.B	Npdc1	1.579	1.721	-0.142
chr2-26488749-26489161	-2.959	0.002	TAL1.H12CORE.1.P.B_TAL1.H12CORE.1.P.B	Npdc1	1.579	1.721	-0.142
chr2-26488749-26489161	-2.959	0.002	TAL1.H12CORE.2.P.B_TAL1.H12CORE.2.P.B	Npdc1	1.579	1.721	-0.142
chr2-26488749-26489161	-2.959	0.002	TAL1.H12CORE.2.P.B_TAL1.H12CORE.2.P.B	Npdc1	1.579	1.721	-0.142
chr2-26488749-26489161	-2.959	0.002	TAL1.H12CORE.1.P.B_TAL1.H12CORE.1.P.B	Npdc1	1.579	1.721	-0.142
chr2-26488749-26489161	-2.959	0.002	TAL1.H12CORE.1.P.B_TAL1.H12CORE.1.P.B	Npdc1	1.579	1.721	-0.142
chr2-26488749-26489161	-2.959	0.002	TAL1.H12CORE.1.P.B_TAL1.H12CORE.1.P.B	Npdc1	1.579	1.721	-0.142
chr2-26488749-26489161	-2.959	0.002	TAL1.H12CORE.2.P.B_TAL1.H12CORE.2.P.B	Npdc1	1.579	1.721	-0.142
chr2-26488749-26489161	-2.959	0.002	TAL1.H12CORE.2.P.B_TAL1.H12CORE.2.P.B	Npdc1	1.579	1.721	-0.142
chr2-26500037-26501126	-3.57	0	TAL1.H12CORE.1.P.B_TAL1.H12CORE.1.P.B	Npdc1	1.579	1.721	-0.142
chr2-26500037-26501126	-3.57	0	TAL1.H12CORE.1.P.B_TAL1.H12CORE.1.P.B	Npdc1	1.579	1.721	-0.142
chr2-26501583-26504134	-4.89	0	TAL1.H12CORE.2.P.B_TAL1.H12CORE.2.P.B	Npdc1	1.579	1.721	-0.142
chr2-26501583-26504134	-4.89	0	TAL1.H12CORE.2.P.B_TAL1.H12CORE.2.P.B	Npdc1	1.579	1.721	-0.142
chr8-120289479-120290102	-2.896	0.002	TAL1.H12CORE.2.P.B_TAL1.H12CORE.2.P.B	Hsbp1	2.033	2.174	-0.141
chr8-120289479-120290102	-2.896	0.002	TAL1.H12CORE.2.P.B_TAL1.H12CORE.2.P.B	Hsbp1	2.033	2.174	-0.141
chr8-120291751-120292728	-2.606	0.005	TAL1.H12CORE.2.P.B_TAL1.H12CORE.2.P.B	Hsbp1	2.033	2.174	-0.141
chr8-120291751-120292728	-2.606	0.005	TAL1.H12CORE.2.P.B_TAL1.H12CORE.2.P.B	Hsbp1	2.033	2.174	-0.141
chr8-120416117-120417412	-2.623	0.004	TAL1.H12CORE.2.P.B_TAL1.H12CORE.2.P.B	Hsbp1	2.033	2.174	-0.141
chr8-120416117-120417412	-2.623	0.004	TAL1.H12CORE.2.P.B_TAL1.H12CORE.2.P.B	Hsbp1	2.033	2.174	-0.141
chr8-120416117-120417412	-2.623	0.004	TAL1.H12CORE.2.P.B_TAL1.H12CORE.2.P.B	Hsbp1	2.033	2.174	-0.141
chr8-120416117-120417412	-2.623	0.004	TAL1.H12CORE.2.P.B_TAL1.H12CORE.2.P.B	Hsbp1	2.033	2.174	-0.141
chr8-120416117-120417412	-2.623	0.004	TAL1.H12CORE.2.P.B_TAL1.H12CORE.2.P.B	Hsbp1	2.033	2.174	-0.141
chr8-120416117-120417412	-2.623	0.004	TAL1.H12CORE.2.P.B_TAL1.H12CORE.2.P.B	Hsbp1	2.033	2.174	-0.141
chr8-120416117-120417412	-2.623	0.004	TAL1.H12CORE.2.P.B_TAL1.H12CORE.2.P.B	Hsbp1	2.033	2.174	-0.141
chr8-120416117-120417412	-2.623	0.004	TAL1.H12CORE.2.P.B_TAL1.H12CORE.2.P.B	Hsbp1	2.033	2.174	-0.141
chr8-120520607-120522014	-2.771	0.003	TAL1.H12CORE.2.P.B_TAL1.H12CORE.2.P.B	Hsbp1	2.033	2.174	-0.141
chr8-120520607-120522014	-2.771	0.003	TAL1.H12CORE.2.P.B_TAL1.H12CORE.2.P.B	Hsbp1	2.033	2.174	-0.141
chr8-120520607-120522014	-2.771	0.003	TAL1.H12CORE.2.P.B_TAL1.H12CORE.2.P.B	Hsbp1	2.033	2.174	-0.141
chr8-120520607-120522014	-2.771	0.003	TAL1.H12CORE.2.P.B_TAL1.H12CORE.2.P.B	Hsbp1	2.033	2.174	-0.141
chr8-120520607-120522014	-2.771	0.003	TAL1.H12CORE.2.P.B_TAL1.H12CORE.2.P.B	Hsbp1	2.033	2.174	-0.141
chr8-120520607-120522014	-2.771	0.003	TAL1.H12CORE.2.P.B_TAL1.H12CORE.2.P.B	Hsbp1	2.033	2.174	-0.141
chr7-34629601-34631112	-2.379	0.009	TAL1.H12CORE.2.P.B_TAL1.H12CORE.2.P.B	Lrp3	0.522	0.662	-0.14
chr7-34629601-34631112	-2.379	0.009	TAL1.H12CORE.2.P.B_TAL1.H12CORE.2.P.B	Lrp3	0.522	0.662	-0.14
chr10-80259789-80261976	-2.785	0.003	TAL1.H12CORE.2.P.B_TAL1.H12CORE.2.P.B	Gm16105	0.324	0.463	-0.139
chr19-46503395-46504292	-2.773	0.003	TAL1.H12CORE.0.P.B_TAL1.H12CORE.0.P.B	Sorcs3	0.008	0.146	-0.138
chr19-46503395-46504292	-2.773	0.003	TAL1.H12CORE.0.P.B_TAL1.H12CORE.0.P.B	Sorcs3	0.008	0.146	-0.138
chr3-158559226-158562422	2.543	0.005	TAL1.H12CORE.2.P.B_TAL1.H12CORE.2.P.B	Lrrc7	0.013	0.15	-0.137
chr3-158559226-158562422	2.543	0.005	TAL1.H12CORE.2.P.B_TAL1.H12CORE.2.P.B	Lrrc7	0.013	0.15	-0.137
chr5-115397801-115398950	-3.416	0	TAL1.H12CORE.1.P.B_TAL1.H12CORE.1.P.B	Dynll1	3.439	3.575	-0.137
chr5-115397801-115398950	-3.416	0	TAL1.H12CORE.1.P.B_TAL1.H12CORE.1.P.B	Dynll1	3.439	3.575	-0.137
chr2-137114116-137115064	-2.593	0.005	TAL1.H12CORE.1.P.B_TAL1.H12CORE.1.P.B	Snap25	0.462	0.598	-0.136
chr2-137114116-137115064	-2.593	0.005	TAL1.H12CORE.1.P.B_TAL1.H12CORE.1.P.B	Snap25	0.462	0.598	-0.136
chr4-148770344-148772074	2.601	0.005	TAL1.H12CORE.2.P.B_TAL1.H12CORE.2.P.B	Casz1	0.032	0.166	-0.134
chr4-148770344-148772074	2.601	0.005	TAL1.H12CORE.2.P.B_TAL1.H12CORE.2.P.B	Casz1	0.032	0.166	-0.134
chr4-148859496-148861004	2.409	0.008	TAL1.H12CORE.2.P.B_TAL1.H12CORE.2.P.B	Casz1	0.032	0.166	-0.134
chr4-148859496-148861004	2.409	0.008	TAL1.H12CORE.2.P.B_TAL1.H12CORE.2.P.B	Casz1	0.032	0.166	-0.134
chr15-81802035-81803269	-3.082	0.001	TAL1.H12CORE.1.P.B_TAL1.H12CORE.1.P.B	Tcf20	0.382	0.516	-0.134
chr15-81802035-81803269	-3.082	0.001	TAL1.H12CORE.1.P.B_TAL1.H12CORE.1.P.B	Tcf20	0.382	0.516	-0.134
chr15-81802035-81803269	-3.082	0.001	TAL1.H12CORE.1.P.B_TAL1.H12CORE.1.P.B	Tcf20	0.382	0.516	-0.134
chr15-81802035-81803269	-3.082	0.001	TAL1.H12CORE.2.P.B_TAL1.H12CORE.2.P.B	Tcf20	0.382	0.516	-0.134
chr15-81802035-81803269	-3.082	0.001	TAL1.H12CORE.1.P.B_TAL1.H12CORE.1.P.B	Tcf20	0.382	0.516	-0.134
chr15-81802035-81803269	-3.082	0.001	TAL1.H12CORE.1.P.B_TAL1.H12CORE.1.P.B	Tcf20	0.382	0.516	-0.134
chr15-81802035-81803269	-3.082	0.001	TAL1.H12CORE.1.P.B_TAL1.H12CORE.1.P.B	Tcf20	0.382	0.516	-0.134
chr15-81802035-81803269	-3.082	0.001	TAL1.H12CORE.2.P.B_TAL1.H12CORE.2.P.B	Tcf20	0.382	0.516	-0.134
chr15-82292833-82295325	-2.66	0.004	TAL1.H12CORE.1.P.B_TAL1.H12CORE.1.P.B	Tcf20	0.382	0.516	-0.134
chr15-82292833-82295325	-2.66	0.004	TAL1.H12CORE.1.P.B_TAL1.H12CORE.1.P.B	Tcf20	0.382	0.516	-0.134
chr15-82292833-82295325	-2.66	0.004	TAL1.H12CORE.2.P.B_TAL1.H12CORE.2.P.B	Tcf20	0.382	0.516	-0.134
chr15-82292833-82295325	-2.66	0.004	TAL1.H12CORE.2.P.B_TAL1.H12CORE.2.P.B	Tcf20	0.382	0.516	-0.134
chr15-82292833-82295325	-2.66	0.004	TAL1.H12CORE.1.P.B_TAL1.H12CORE.1.P.B	Tcf20	0.382	0.516	-0.134
chr15-82292833-82295325	-2.66	0.004	TAL1.H12CORE.1.P.B_TAL1.H12CORE.1.P.B	Tcf20	0.382	0.516	-0.134
chr15-82292833-82295325	-2.66	0.004	TAL1.H12CORE.2.P.B_TAL1.H12CORE.2.P.B	Tcf20	0.382	0.516	-0.134
chr15-82292833-82295325	-2.66	0.004	TAL1.H12CORE.2.P.B_TAL1.H12CORE.2.P.B	Tcf20	0.382	0.516	-0.134
chr17-25560905-25562086	-3.389	0	TAL1.H12CORE.0.P.B_TAL1.H12CORE.0.P.B	Spsb3	0.368	0.502	-0.134
chr17-25560905-25562086	-3.389	0	TAL1.H12CORE.0.P.B_TAL1.H12CORE.0.P.B	Spsb3	0.368	0.502	-0.134
chr7-34629601-34631112	2.677	0.004	TAL1.H12CORE.2.P.B_TAL1.H12CORE.2.P.B	Cebpg	0.403	0.536	-0.134
chr7-34629601-34631112	2.677	0.004	TAL1.H12CORE.2.P.B_TAL1.H12CORE.2.P.B	Cebpg	0.403	0.536	-0.134
chr9-121809249-121810931	-2.735	0.003	TAL1.H12CORE.1.P.B_TAL1.H12CORE.1.P.B	1700048O20Rik	0.218	0.351	-0.133
chr9-121809249-121810931	-2.735	0.003	TAL1.H12CORE.2.P.B_TAL1.H12CORE.2.P.B	1700048O20Rik	0.218	0.351	-0.133
chr9-121809249-121810931	-2.735	0.003	TAL1.H12CORE.1.P.B_TAL1.H12CORE.1.P.B	1700048O20Rik	0.218	0.351	-0.133
chr9-121809249-121810931	-2.735	0.003	TAL1.H12CORE.2.P.B_TAL1.H12CORE.2.P.B	1700048O20Rik	0.218	0.351	-0.133
chr4-148770344-148772074	-2.9	0.002	TAL1.H12CORE.2.P.B_TAL1.H12CORE.2.P.B	Ctnnbip1	0.895	1.028	-0.133
chr4-148770344-148772074	-2.9	0.002	TAL1.H12CORE.2.P.B_TAL1.H12CORE.2.P.B	Ctnnbip1	0.895	1.028	-0.133
chr15-76460954-76462677	-2.597	0.005	TAL1.H12CORE.1.P.B_TAL1.H12CORE.1.P.B	Grina	1.196	1.328	-0.132
chr15-76460954-76462677	-2.597	0.005	TAL1.H12CORE.1.P.B_TAL1.H12CORE.1.P.B	Grina	1.196	1.328	-0.132
chr15-76460954-76462677	-2.597	0.005	TAL1.H12CORE.2.P.B_TAL1.H12CORE.2.P.B	Grina	1.196	1.328	-0.132
chr15-76460954-76462677	-2.597	0.005	TAL1.H12CORE.2.P.B_TAL1.H12CORE.2.P.B	Grina	1.196	1.328	-0.132
chr15-76460954-76462677	-2.597	0.005	TAL1.H12CORE.1.P.B_TAL1.H12CORE.1.P.B	Grina	1.196	1.328	-0.132
chr15-76460954-76462677	-2.597	0.005	TAL1.H12CORE.1.P.B_TAL1.H12CORE.1.P.B	Grina	1.196	1.328	-0.132
chr15-76460954-76462677	-2.597	0.005	TAL1.H12CORE.2.P.B_TAL1.H12CORE.2.P.B	Grina	1.196	1.328	-0.132
chr15-76460954-76462677	-2.597	0.005	TAL1.H12CORE.2.P.B_TAL1.H12CORE.2.P.B	Grina	1.196	1.328	-0.132
chr8-84729810-84732148	-2.417	0.008	TAL1.H12CORE.0.P.B_TAL1.H12CORE.0.P.B	Mast1	0.131	0.262	-0.131
chr8-84729810-84732148	-2.417	0.008	TAL1.H12CORE.0.P.B_TAL1.H12CORE.0.P.B	Mast1	0.131	0.262	-0.131
chr8-84729810-84732148	-2.417	0.008	TAL1.H12CORE.0.P.B_TAL1.H12CORE.0.P.B	Mast1	0.131	0.262	-0.131
chr8-84729810-84732148	-2.417	0.008	TAL1.H12CORE.0.P.B_TAL1.H12CORE.0.P.B	Mast1	0.131	0.262	-0.131
chr5-30106940-30108092	-2.812	0.002	TAL1.H12CORE.1.P.B_TAL1.H12CORE.1.P.B	Dnajb6	2.09	2.218	-0.129
chr5-30106940-30108092	-2.812	0.002	TAL1.H12CORE.2.P.B_TAL1.H12CORE.2.P.B	Dnajb6	2.09	2.218	-0.129
chr5-30106940-30108092	-2.812	0.002	TAL1.H12CORE.1.P.B_TAL1.H12CORE.1.P.B	Dnajb6	2.09	2.218	-0.129
chr5-30106940-30108092	-2.812	0.002	TAL1.H12CORE.2.P.B_TAL1.H12CORE.2.P.B	Dnajb6	2.09	2.218	-0.129
chr1-128471634-128473179	-2.643	0.004	TAL1.H12CORE.0.P.B_TAL1.H12CORE.0.P.B	Ccnt2	0.684	0.811	-0.127
chr1-128471634-128473179	-2.643	0.004	TAL1.H12CORE.1.P.B_TAL1.H12CORE.1.P.B	Ccnt2	0.684	0.811	-0.127
chr1-128471634-128473179	-2.643	0.004	TAL1.H12CORE.0.P.B_TAL1.H12CORE.0.P.B	Ccnt2	0.684	0.811	-0.127
chr1-128471634-128473179	-2.643	0.004	TAL1.H12CORE.1.P.B_TAL1.H12CORE.1.P.B	Ccnt2	0.684	0.811	-0.127
chr2-25182618-25183032	-2.432	0.008	TAL1.H12CORE.2.P.B_TAL1.H12CORE.2.P.B	Rnf208	0.153	0.28	-0.127
chr2-25182618-25183032	-2.432	0.008	TAL1.H12CORE.2.P.B_TAL1.H12CORE.2.P.B	Rnf208	0.153	0.28	-0.127
chr2-25185352-25186665	-2.66	0.004	TAL1.H12CORE.2.P.B_TAL1.H12CORE.2.P.B	Rnf208	0.153	0.28	-0.127
chr2-25185352-25186665	-2.66	0.004	TAL1.H12CORE.2.P.B_TAL1.H12CORE.2.P.B	Rnf208	0.153	0.28	-0.127
chr2-26486498-26488060	-3.335	0	TAL1.H12CORE.2.P.B_TAL1.H12CORE.2.P.B	Rnf208	0.153	0.28	-0.127
chr2-26486498-26488060	-3.335	0	TAL1.H12CORE.2.P.B_TAL1.H12CORE.2.P.B	Rnf208	0.153	0.28	-0.127
chr2-26488749-26489161	-2.598	0.005	TAL1.H12CORE.1.P.B_TAL1.H12CORE.1.P.B	Rnf208	0.153	0.28	-0.127
chr2-26488749-26489161	-2.598	0.005	TAL1.H12CORE.1.P.B_TAL1.H12CORE.1.P.B	Rnf208	0.153	0.28	-0.127
chr2-26488749-26489161	-2.598	0.005	TAL1.H12CORE.1.P.B_TAL1.H12CORE.1.P.B	Rnf208	0.153	0.28	-0.127
chr2-26488749-26489161	-2.598	0.005	TAL1.H12CORE.2.P.B_TAL1.H12CORE.2.P.B	Rnf208	0.153	0.28	-0.127
chr2-26488749-26489161	-2.598	0.005	TAL1.H12CORE.2.P.B_TAL1.H12CORE.2.P.B	Rnf208	0.153	0.28	-0.127
chr2-26488749-26489161	-2.598	0.005	TAL1.H12CORE.1.P.B_TAL1.H12CORE.1.P.B	Rnf208	0.153	0.28	-0.127
chr2-26488749-26489161	-2.598	0.005	TAL1.H12CORE.1.P.B_TAL1.H12CORE.1.P.B	Rnf208	0.153	0.28	-0.127
chr2-26488749-26489161	-2.598	0.005	TAL1.H12CORE.1.P.B_TAL1.H12CORE.1.P.B	Rnf208	0.153	0.28	-0.127
chr2-26488749-26489161	-2.598	0.005	TAL1.H12CORE.2.P.B_TAL1.H12CORE.2.P.B	Rnf208	0.153	0.28	-0.127
chr2-26488749-26489161	-2.598	0.005	TAL1.H12CORE.2.P.B_TAL1.H12CORE.2.P.B	Rnf208	0.153	0.28	-0.127
chr2-26500037-26501126	-3.873	0	TAL1.H12CORE.1.P.B_TAL1.H12CORE.1.P.B	Rnf208	0.153	0.28	-0.127
chr2-26500037-26501126	-3.873	0	TAL1.H12CORE.1.P.B_TAL1.H12CORE.1.P.B	Rnf208	0.153	0.28	-0.127
chr2-26501583-26504134	-5.043	0	TAL1.H12CORE.2.P.B_TAL1.H12CORE.2.P.B	Rnf208	0.153	0.28	-0.127
chr2-26501583-26504134	-5.043	0	TAL1.H12CORE.2.P.B_TAL1.H12CORE.2.P.B	Rnf208	0.153	0.28	-0.127
chr5-33721237-33723915	-4.026	0	TAL1.H12CORE.1.P.B_TAL1.H12CORE.1.P.B	Maea	0.574	0.701	-0.127
chr5-33721237-33723915	-4.026	0	TAL1.H12CORE.1.P.B_TAL1.H12CORE.1.P.B	Maea	0.574	0.701	-0.127
chr11-120261084-120262893	-3.346	0	TAL1.H12CORE.2.P.B_TAL1.H12CORE.2.P.B	Arl16	0.352	0.479	-0.126
chr11-120261084-120262893	-3.346	0	TAL1.H12CORE.2.P.B_TAL1.H12CORE.2.P.B	Arl16	0.352	0.479	-0.126
chr17-35049470-35050494	2.628	0.004	TAL1.H12CORE.2.P.B_TAL1.H12CORE.2.P.B	Ddah2	2.215	2.341	-0.126
chr17-35049470-35050494	2.628	0.004	TAL1.H12CORE.2.P.B_TAL1.H12CORE.2.P.B	Ddah2	2.215	2.341	-0.126
chr17-35049470-35050494	2.628	0.004	TAL1.H12CORE.2.P.B_TAL1.H12CORE.2.P.B	Ddah2	2.215	2.341	-0.126
chr17-35049470-35050494	2.628	0.004	TAL1.H12CORE.2.P.B_TAL1.H12CORE.2.P.B	Ddah2	2.215	2.341	-0.126
chr10-80136971-80139530	-2.449	0.007	TAL1.H12CORE.1.P.B_TAL1.H12CORE.1.P.B	Csnk1g2	0.433	0.557	-0.124
chr10-80136971-80139530	-2.449	0.007	TAL1.H12CORE.1.P.B_TAL1.H12CORE.1.P.B	Csnk1g2	0.433	0.557	-0.124
chr10-80259789-80261976	2.483	0.007	TAL1.H12CORE.2.P.B_TAL1.H12CORE.2.P.B	Csnk1g2	0.433	0.557	-0.124
chr10-80259789-80261976	2.483	0.007	TAL1.H12CORE.2.P.B_TAL1.H12CORE.2.P.B	Csnk1g2	0.433	0.557	-0.124
chr19-41745589-41746907	-3.6	0	TAL1.H12CORE.2.P.B_TAL1.H12CORE.2.P.B	Frat1	0.098	0.222	-0.124
chr13-43806192-43807723	-2.356	0.009	TAL1.H12CORE.2.P.B_TAL1.H12CORE.2.P.B	Phactr1	0.302	0.426	-0.124
chr13-43806192-43807723	-2.356	0.009	TAL1.H12CORE.2.P.B_TAL1.H12CORE.2.P.B	Phactr1	0.302	0.426	-0.124
chr9-20663561-20664744	2.454	0.007	TAL1.H12CORE.1.P.B_TAL1.H12CORE.1.P.B	Keap1	0.347	0.471	-0.124
chr9-20663561-20664744	2.454	0.007	TAL1.H12CORE.2.P.B_TAL1.H12CORE.2.P.B	Keap1	0.347	0.471	-0.124
chr9-20663561-20664744	2.454	0.007	TAL1.H12CORE.1.P.B_TAL1.H12CORE.1.P.B	Keap1	0.347	0.471	-0.124
chr9-20663561-20664744	2.454	0.007	TAL1.H12CORE.2.P.B_TAL1.H12CORE.2.P.B	Keap1	0.347	0.471	-0.124
chr9-21243833-21245325	2.965	0.002	TAL1.H12CORE.1.P.B_TAL1.H12CORE.1.P.B	Keap1	0.347	0.471	-0.124
chr9-21243833-21245325	2.965	0.002	TAL1.H12CORE.1.P.B_TAL1.H12CORE.1.P.B	Keap1	0.347	0.471	-0.124
chr9-22035112-22036254	-2.546	0.005	TAL1.H12CORE.1.P.B_TAL1.H12CORE.1.P.B	Keap1	0.347	0.471	-0.124
chr9-22035112-22036254	-2.546	0.005	TAL1.H12CORE.1.P.B_TAL1.H12CORE.1.P.B	Keap1	0.347	0.471	-0.124
chr9-22035112-22036254	-2.546	0.005	TAL1.H12CORE.2.P.B_TAL1.H12CORE.2.P.B	Keap1	0.347	0.471	-0.124
chr9-22035112-22036254	-2.546	0.005	TAL1.H12CORE.1.P.B_TAL1.H12CORE.1.P.B	Keap1	0.347	0.471	-0.124
chr9-22035112-22036254	-2.546	0.005	TAL1.H12CORE.1.P.B_TAL1.H12CORE.1.P.B	Keap1	0.347	0.471	-0.124
chr9-22035112-22036254	-2.546	0.005	TAL1.H12CORE.2.P.B_TAL1.H12CORE.2.P.B	Keap1	0.347	0.471	-0.124
chr4-154948172-154949078	3.998	0	TAL1.H12CORE.2.P.B_TAL1.H12CORE.2.P.B	A430005L14Rik	0.312	0.436	-0.124
chr4-154948172-154949078	3.998	0	TAL1.H12CORE.2.P.B_TAL1.H12CORE.2.P.B	A430005L14Rik	0.312	0.436	-0.124
chr4-154952568-154953278	4.248	0	TAL1.H12CORE.2.P.B_TAL1.H12CORE.2.P.B	A430005L14Rik	0.312	0.436	-0.124
chr4-154952568-154953278	4.248	0	TAL1.H12CORE.2.P.B_TAL1.H12CORE.2.P.B	A430005L14Rik	0.312	0.436	-0.124
chr4-154960316-154961577	2.53	0.006	TAL1.H12CORE.2.P.B_TAL1.H12CORE.2.P.B	A430005L14Rik	0.312	0.436	-0.124
chr4-154960316-154961577	2.53	0.006	TAL1.H12CORE.2.P.B_TAL1.H12CORE.2.P.B	A430005L14Rik	0.312	0.436	-0.124
chr4-155172562-155173963	2.394	0.008	TAL1.H12CORE.2.P.B_TAL1.H12CORE.2.P.B	A430005L14Rik	0.312	0.436	-0.124
chr4-155172562-155173963	2.394	0.008	TAL1.H12CORE.2.P.B_TAL1.H12CORE.2.P.B	A430005L14Rik	0.312	0.436	-0.124
chr11-77893565-77894741	-3.263	0.001	TAL1.H12CORE.1.P.B_TAL1.H12CORE.1.P.B	Fam222b	0.215	0.339	-0.124
chr11-77893565-77894741	-3.263	0.001	TAL1.H12CORE.1.P.B_TAL1.H12CORE.1.P.B	Fam222b	0.215	0.339	-0.124
chr11-77964537-77966174	-2.939	0.002	TAL1.H12CORE.1.P.B_TAL1.H12CORE.1.P.B	Fam222b	0.215	0.339	-0.124
chr11-77964537-77966174	-2.939	0.002	TAL1.H12CORE.1.P.B_TAL1.H12CORE.1.P.B	Fam222b	0.215	0.339	-0.124
chr10-127077610-127080151	3.167	0.001	TAL1.H12CORE.1.P.B_TAL1.H12CORE.1.P.B	Lrp1	0.421	0.544	-0.123
chr10-127077610-127080151	3.167	0.001	TAL1.H12CORE.1.P.B_TAL1.H12CORE.1.P.B	Lrp1	0.421	0.544	-0.123
chr2-26090657-26092549	3.252	0.001	TAL1.H12CORE.1.P.B_TAL1.H12CORE.1.P.B	Nelfb	0.327	0.451	-0.123
chr2-26090657-26092549	3.252	0.001	TAL1.H12CORE.1.P.B_TAL1.H12CORE.1.P.B	Nelfb	0.327	0.451	-0.123
chr2-26297617-26299588	-3.537	0	TAL1.H12CORE.2.P.B_TAL1.H12CORE.2.P.B	Nelfb	0.327	0.451	-0.123
chr2-26297617-26299588	-3.537	0	TAL1.H12CORE.2.P.B_TAL1.H12CORE.2.P.B	Nelfb	0.327	0.451	-0.123
chr2-26486498-26488060	2.47	0.007	TAL1.H12CORE.2.P.B_TAL1.H12CORE.2.P.B	Nelfb	0.327	0.451	-0.123
chr2-26486498-26488060	2.47	0.007	TAL1.H12CORE.2.P.B_TAL1.H12CORE.2.P.B	Nelfb	0.327	0.451	-0.123
chr2-26501583-26504134	2.961	0.002	TAL1.H12CORE.2.P.B_TAL1.H12CORE.2.P.B	Nelfb	0.327	0.451	-0.123
chr2-26501583-26504134	2.961	0.002	TAL1.H12CORE.2.P.B_TAL1.H12CORE.2.P.B	Nelfb	0.327	0.451	-0.123
chr3-108196871-108197653	-2.327	0.01	TAL1.H12CORE.2.P.B_TAL1.H12CORE.2.P.B	Taf13	0.674	0.798	-0.123
chr3-108196871-108197653	-2.327	0.01	TAL1.H12CORE.2.P.B_TAL1.H12CORE.2.P.B	Taf13	0.674	0.798	-0.123
chr3-108196871-108197653	-2.327	0.01	TAL1.H12CORE.2.P.B_TAL1.H12CORE.2.P.B	Taf13	0.674	0.798	-0.123
chr3-108196871-108197653	-2.327	0.01	TAL1.H12CORE.2.P.B_TAL1.H12CORE.2.P.B	Taf13	0.674	0.798	-0.123
chr10-127077610-127080151	2.497	0.006	TAL1.H12CORE.1.P.B_TAL1.H12CORE.1.P.B	Kif5a	0.392	0.514	-0.122
chr10-127077610-127080151	2.497	0.006	TAL1.H12CORE.1.P.B_TAL1.H12CORE.1.P.B	Kif5a	0.392	0.514	-0.122
chr11-3773279-3775314	-2.545	0.005	TAL1.H12CORE.1.P.B_TAL1.H12CORE.1.P.B	Uqcr10	1.634	1.755	-0.122
chr11-3773279-3775314	-2.545	0.005	TAL1.H12CORE.2.P.B_TAL1.H12CORE.2.P.B	Uqcr10	1.634	1.755	-0.122
chr11-3773279-3775314	-2.545	0.005	TAL1.H12CORE.1.P.B_TAL1.H12CORE.1.P.B	Uqcr10	1.634	1.755	-0.122
chr11-3773279-3775314	-2.545	0.005	TAL1.H12CORE.2.P.B_TAL1.H12CORE.2.P.B	Uqcr10	1.634	1.755	-0.122
chr11-4946655-4948533	-4.121	0	TAL1.H12CORE.2.P.B_TAL1.H12CORE.2.P.B	Uqcr10	1.634	1.755	-0.122
chr11-4946655-4948533	-4.121	0	TAL1.H12CORE.2.P.B_TAL1.H12CORE.2.P.B	Uqcr10	1.634	1.755	-0.122
chr19-7067844-7069424	2.642	0.004	TAL1.H12CORE.1.P.B_TAL1.H12CORE.1.P.B	Rcor2	0.948	1.069	-0.121
chr19-7067844-7069424	2.642	0.004	TAL1.H12CORE.2.P.B_TAL1.H12CORE.2.P.B	Rcor2	0.948	1.069	-0.121
chr19-7067844-7069424	2.642	0.004	TAL1.H12CORE.1.P.B_TAL1.H12CORE.1.P.B	Rcor2	0.948	1.069	-0.121
chr19-7067844-7069424	2.642	0.004	TAL1.H12CORE.2.P.B_TAL1.H12CORE.2.P.B	Rcor2	0.948	1.069	-0.121
chr19-7265572-7266459	4.676	0	TAL1.H12CORE.1.P.B_TAL1.H12CORE.1.P.B	Rcor2	0.948	1.069	-0.121
chr19-7265572-7266459	4.676	0	TAL1.H12CORE.2.P.B_TAL1.H12CORE.2.P.B	Rcor2	0.948	1.069	-0.121
chr19-7265572-7266459	4.676	0	TAL1.H12CORE.1.P.B_TAL1.H12CORE.1.P.B	Rcor2	0.948	1.069	-0.121
chr19-7265572-7266459	4.676	0	TAL1.H12CORE.2.P.B_TAL1.H12CORE.2.P.B	Rcor2	0.948	1.069	-0.121
chr8-84701294-84701962	-2.626	0.004	TAL1.H12CORE.0.P.B_TAL1.H12CORE.0.P.B	Fbxw9	0.229	0.35	-0.121
chr8-84701294-84701962	-2.626	0.004	TAL1.H12CORE.0.P.B_TAL1.H12CORE.0.P.B	Fbxw9	0.229	0.35	-0.121
chr8-84701294-84701962	-2.626	0.004	TAL1.H12CORE.0.P.B_TAL1.H12CORE.0.P.B	Fbxw9	0.229	0.35	-0.121
chr8-84701294-84701962	-2.626	0.004	TAL1.H12CORE.0.P.B_TAL1.H12CORE.0.P.B	Fbxw9	0.229	0.35	-0.121
chr8-84729810-84732148	-3.302	0	TAL1.H12CORE.0.P.B_TAL1.H12CORE.0.P.B	Fbxw9	0.229	0.35	-0.121
chr8-84729810-84732148	-3.302	0	TAL1.H12CORE.0.P.B_TAL1.H12CORE.0.P.B	Fbxw9	0.229	0.35	-0.121
chr8-84729810-84732148	-3.302	0	TAL1.H12CORE.0.P.B_TAL1.H12CORE.0.P.B	Fbxw9	0.229	0.35	-0.121
chr8-84729810-84732148	-3.302	0	TAL1.H12CORE.0.P.B_TAL1.H12CORE.0.P.B	Fbxw9	0.229	0.35	-0.121
chr8-84814016-84815876	-4.1	0	TAL1.H12CORE.1.P.B_TAL1.H12CORE.1.P.B	Fbxw9	0.229	0.35	-0.121
chr8-84814016-84815876	-4.1	0	TAL1.H12CORE.1.P.B_TAL1.H12CORE.1.P.B	Fbxw9	0.229	0.35	-0.121
chr8-84814016-84815876	-4.1	0	TAL1.H12CORE.2.P.B_TAL1.H12CORE.2.P.B	Fbxw9	0.229	0.35	-0.121
chr8-84814016-84815876	-4.1	0	TAL1.H12CORE.2.P.B_TAL1.H12CORE.2.P.B	Fbxw9	0.229	0.35	-0.121
chr8-84814016-84815876	-4.1	0	TAL1.H12CORE.1.P.B_TAL1.H12CORE.1.P.B	Fbxw9	0.229	0.35	-0.121
chr8-84814016-84815876	-4.1	0	TAL1.H12CORE.1.P.B_TAL1.H12CORE.1.P.B	Fbxw9	0.229	0.35	-0.121
chr8-84814016-84815876	-4.1	0	TAL1.H12CORE.2.P.B_TAL1.H12CORE.2.P.B	Fbxw9	0.229	0.35	-0.121
chr8-84814016-84815876	-4.1	0	TAL1.H12CORE.2.P.B_TAL1.H12CORE.2.P.B	Fbxw9	0.229	0.35	-0.121
chr11-77893565-77894741	-4.462	0	TAL1.H12CORE.1.P.B_TAL1.H12CORE.1.P.B	Dhrs13	0.186	0.306	-0.12
chr11-77893565-77894741	-4.462	0	TAL1.H12CORE.1.P.B_TAL1.H12CORE.1.P.B	Dhrs13	0.186	0.306	-0.12
chr11-77964537-77966174	-2.717	0.003	TAL1.H12CORE.1.P.B_TAL1.H12CORE.1.P.B	Dhrs13	0.186	0.306	-0.12
chr11-77964537-77966174	-2.717	0.003	TAL1.H12CORE.1.P.B_TAL1.H12CORE.1.P.B	Dhrs13	0.186	0.306	-0.12
chr4-107828394-107829238	3.209	0.001	TAL1.H12CORE.2.P.B_TAL1.H12CORE.2.P.B	Scp2	0.953	1.073	-0.12
chr4-107828394-107829238	3.209	0.001	TAL1.H12CORE.2.P.B_TAL1.H12CORE.2.P.B	Scp2	0.953	1.073	-0.12
chr12-105336024-105337827	2.974	0.001	TAL1.H12CORE.1.P.B_TAL1.H12CORE.1.P.B	D430019H16Rik	0.41	0.53	-0.12
chr12-105336024-105337827	2.974	0.001	TAL1.H12CORE.2.P.B_TAL1.H12CORE.2.P.B	D430019H16Rik	0.41	0.53	-0.12
chr12-105336024-105337827	2.974	0.001	TAL1.H12CORE.1.P.B_TAL1.H12CORE.1.P.B	D430019H16Rik	0.41	0.53	-0.12
chr12-105336024-105337827	2.974	0.001	TAL1.H12CORE.2.P.B_TAL1.H12CORE.2.P.B	D430019H16Rik	0.41	0.53	-0.12
chr13-51917632-51919699	3.05	0.001	TAL1.H12CORE.0.P.B_TAL1.H12CORE.0.P.B	Cks2	0.202	0.321	-0.119
chr13-51917632-51919699	3.05	0.001	TAL1.H12CORE.1.P.B_TAL1.H12CORE.1.P.B	Cks2	0.202	0.321	-0.119
chr13-51917632-51919699	3.05	0.001	TAL1.H12CORE.2.P.B_TAL1.H12CORE.2.P.B	Cks2	0.202	0.321	-0.119
chr13-51917632-51919699	3.05	0.001	TAL1.H12CORE.0.P.B_TAL1.H12CORE.0.P.B	Cks2	0.202	0.321	-0.119
chr13-51917632-51919699	3.05	0.001	TAL1.H12CORE.1.P.B_TAL1.H12CORE.1.P.B	Cks2	0.202	0.321	-0.119
chr13-51917632-51919699	3.05	0.001	TAL1.H12CORE.2.P.B_TAL1.H12CORE.2.P.B	Cks2	0.202	0.321	-0.119
chr13-51920192-51921376	4.635	0	TAL1.H12CORE.1.P.B_TAL1.H12CORE.1.P.B	Cks2	0.202	0.321	-0.119
chr13-51920192-51921376	4.635	0	TAL1.H12CORE.1.P.B_TAL1.H12CORE.1.P.B	Cks2	0.202	0.321	-0.119
chr13-51920192-51921376	4.635	0	TAL1.H12CORE.1.P.B_TAL1.H12CORE.1.P.B	Cks2	0.202	0.321	-0.119
chr13-51920192-51921376	4.635	0	TAL1.H12CORE.2.P.B_TAL1.H12CORE.2.P.B	Cks2	0.202	0.321	-0.119
chr13-51920192-51921376	4.635	0	TAL1.H12CORE.2.P.B_TAL1.H12CORE.2.P.B	Cks2	0.202	0.321	-0.119
chr13-51920192-51921376	4.635	0	TAL1.H12CORE.2.P.B_TAL1.H12CORE.2.P.B	Cks2	0.202	0.321	-0.119
chr13-51920192-51921376	4.635	0	TAL1.H12CORE.1.P.B_TAL1.H12CORE.1.P.B	Cks2	0.202	0.321	-0.119
chr13-51920192-51921376	4.635	0	TAL1.H12CORE.1.P.B_TAL1.H12CORE.1.P.B	Cks2	0.202	0.321	-0.119
chr13-51920192-51921376	4.635	0	TAL1.H12CORE.1.P.B_TAL1.H12CORE.1.P.B	Cks2	0.202	0.321	-0.119
chr13-51920192-51921376	4.635	0	TAL1.H12CORE.2.P.B_TAL1.H12CORE.2.P.B	Cks2	0.202	0.321	-0.119
chr13-51920192-51921376	4.635	0	TAL1.H12CORE.2.P.B_TAL1.H12CORE.2.P.B	Cks2	0.202	0.321	-0.119
chr13-51920192-51921376	4.635	0	TAL1.H12CORE.2.P.B_TAL1.H12CORE.2.P.B	Cks2	0.202	0.321	-0.119
chr12-111693349-111695473	-4.729	0	TAL1.H12CORE.2.P.B_TAL1.H12CORE.2.P.B	Tmem179	0.086	0.205	-0.119
chr12-111693349-111695473	-4.729	0	TAL1.H12CORE.2.P.B_TAL1.H12CORE.2.P.B	Tmem179	0.086	0.205	-0.119
chr12-112663199-112664804	-2.702	0.003	TAL1.H12CORE.1.P.B_TAL1.H12CORE.1.P.B	Tmem179	0.086	0.205	-0.119
chr12-112663199-112664804	-2.702	0.003	TAL1.H12CORE.2.P.B_TAL1.H12CORE.2.P.B	Tmem179	0.086	0.205	-0.119
chr12-112663199-112664804	-2.702	0.003	TAL1.H12CORE.1.P.B_TAL1.H12CORE.1.P.B	Tmem179	0.086	0.205	-0.119
chr12-112663199-112664804	-2.702	0.003	TAL1.H12CORE.2.P.B_TAL1.H12CORE.2.P.B	Tmem179	0.086	0.205	-0.119
chr12-112928264-112930374	2.646	0.004	TAL1.H12CORE.1.P.B_TAL1.H12CORE.1.P.B	Tmem179	0.086	0.205	-0.119
chr12-112928264-112930374	2.646	0.004	TAL1.H12CORE.1.P.B_TAL1.H12CORE.1.P.B	Tmem179	0.086	0.205	-0.119
chr9-59588088-59589632	2.376	0.009	TAL1.H12CORE.1.P.B_TAL1.H12CORE.1.P.B	Celf6	0.195	0.313	-0.119
chr9-59588088-59589632	2.376	0.009	TAL1.H12CORE.1.P.B_TAL1.H12CORE.1.P.B	Celf6	0.195	0.313	-0.119
chr11-119988861-119989741	2.85	0.002	TAL1.H12CORE.1.P.B_TAL1.H12CORE.1.P.B	P4hb	0.54	0.659	-0.118
chr11-119988861-119989741	2.85	0.002	TAL1.H12CORE.2.P.B_TAL1.H12CORE.2.P.B	P4hb	0.54	0.659	-0.118
chr11-119988861-119989741	2.85	0.002	TAL1.H12CORE.1.P.B_TAL1.H12CORE.1.P.B	P4hb	0.54	0.659	-0.118
chr11-119988861-119989741	2.85	0.002	TAL1.H12CORE.2.P.B_TAL1.H12CORE.2.P.B	P4hb	0.54	0.659	-0.118
chr11-120261084-120262893	3.283	0.001	TAL1.H12CORE.2.P.B_TAL1.H12CORE.2.P.B	P4hb	0.54	0.659	-0.118
chr11-120261084-120262893	3.283	0.001	TAL1.H12CORE.2.P.B_TAL1.H12CORE.2.P.B	P4hb	0.54	0.659	-0.118
chr14-100283272-100286737	3.564	0	TAL1.H12CORE.0.P.B_TAL1.H12CORE.0.P.B	Klf12	0.086	0.204	-0.118
chr14-100283272-100286737	3.564	0	TAL1.H12CORE.1.P.B_TAL1.H12CORE.1.P.B	Klf12	0.086	0.204	-0.118
chr14-100283272-100286737	3.564	0	TAL1.H12CORE.1.P.B_TAL1.H12CORE.1.P.B	Klf12	0.086	0.204	-0.118
chr14-100283272-100286737	3.564	0	TAL1.H12CORE.2.P.B_TAL1.H12CORE.2.P.B	Klf12	0.086	0.204	-0.118
chr14-100283272-100286737	3.564	0	TAL1.H12CORE.0.P.B_TAL1.H12CORE.0.P.B	Klf12	0.086	0.204	-0.118
chr14-100283272-100286737	3.564	0	TAL1.H12CORE.1.P.B_TAL1.H12CORE.1.P.B	Klf12	0.086	0.204	-0.118
chr14-100283272-100286737	3.564	0	TAL1.H12CORE.1.P.B_TAL1.H12CORE.1.P.B	Klf12	0.086	0.204	-0.118
chr14-100283272-100286737	3.564	0	TAL1.H12CORE.2.P.B_TAL1.H12CORE.2.P.B	Klf12	0.086	0.204	-0.118
chr14-54430422-54433714	-2.571	0.005	TAL1.H12CORE.0.P.B_TAL1.H12CORE.0.P.B	Slc22a17	0.667	0.785	-0.118
chr14-54430422-54433714	-2.571	0.005	TAL1.H12CORE.1.P.B_TAL1.H12CORE.1.P.B	Slc22a17	0.667	0.785	-0.118
chr14-54430422-54433714	-2.571	0.005	TAL1.H12CORE.0.P.B_TAL1.H12CORE.0.P.B	Slc22a17	0.667	0.785	-0.118
chr14-54430422-54433714	-2.571	0.005	TAL1.H12CORE.1.P.B_TAL1.H12CORE.1.P.B	Slc22a17	0.667	0.785	-0.118
chr14-55027294-55029653	2.584	0.005	TAL1.H12CORE.1.P.B_TAL1.H12CORE.1.P.B	Slc22a17	0.667	0.785	-0.118
chr14-55027294-55029653	2.584	0.005	TAL1.H12CORE.1.P.B_TAL1.H12CORE.1.P.B	Slc22a17	0.667	0.785	-0.118
chr14-55027294-55029653	2.584	0.005	TAL1.H12CORE.1.P.B_TAL1.H12CORE.1.P.B	Slc22a17	0.667	0.785	-0.118
chr14-55027294-55029653	2.584	0.005	TAL1.H12CORE.1.P.B_TAL1.H12CORE.1.P.B	Slc22a17	0.667	0.785	-0.118
chr2-157339513-157340802	-3.355	0	TAL1.H12CORE.0.P.B_TAL1.H12CORE.0.P.B	Vstm2l	0.64	0.757	-0.118
chr2-157339513-157340802	-3.355	0	TAL1.H12CORE.0.P.B_TAL1.H12CORE.0.P.B	Vstm2l	0.64	0.757	-0.118
chr4-130804345-130805641	-2.804	0.003	TAL1.H12CORE.2.P.B_TAL1.H12CORE.2.P.B	Fabp3	0.246	0.364	-0.118
chr4-130804345-130805641	-2.804	0.003	TAL1.H12CORE.2.P.B_TAL1.H12CORE.2.P.B	Fabp3	0.246	0.364	-0.118
chr12-108263856-108264730	2.395	0.008	TAL1.H12CORE.2.P.B_TAL1.H12CORE.2.P.B	Slc25a29	0.14	0.257	-0.117
chr12-108263856-108264730	2.395	0.008	TAL1.H12CORE.2.P.B_TAL1.H12CORE.2.P.B	Slc25a29	0.14	0.257	-0.117
chr12-111693349-111695473	-4.601	0	TAL1.H12CORE.2.P.B_TAL1.H12CORE.2.P.B	Klc1	1.679	1.797	-0.117
chr12-111693349-111695473	-4.601	0	TAL1.H12CORE.2.P.B_TAL1.H12CORE.2.P.B	Klc1	1.679	1.797	-0.117
chr12-112663199-112664804	-3.195	0.001	TAL1.H12CORE.1.P.B_TAL1.H12CORE.1.P.B	Klc1	1.679	1.797	-0.117
chr12-112663199-112664804	-3.195	0.001	TAL1.H12CORE.2.P.B_TAL1.H12CORE.2.P.B	Klc1	1.679	1.797	-0.117
chr12-112663199-112664804	-3.195	0.001	TAL1.H12CORE.1.P.B_TAL1.H12CORE.1.P.B	Klc1	1.679	1.797	-0.117
chr12-112663199-112664804	-3.195	0.001	TAL1.H12CORE.2.P.B_TAL1.H12CORE.2.P.B	Klc1	1.679	1.797	-0.117
chr12-112665319-112665858	-2.586	0.005	TAL1.H12CORE.1.P.B_TAL1.H12CORE.1.P.B	Klc1	1.679	1.797	-0.117
chr12-112665319-112665858	-2.586	0.005	TAL1.H12CORE.2.P.B_TAL1.H12CORE.2.P.B	Klc1	1.679	1.797	-0.117
chr12-112665319-112665858	-2.586	0.005	TAL1.H12CORE.1.P.B_TAL1.H12CORE.1.P.B	Klc1	1.679	1.797	-0.117
chr12-112665319-112665858	-2.586	0.005	TAL1.H12CORE.2.P.B_TAL1.H12CORE.2.P.B	Klc1	1.679	1.797	-0.117
chr12-112928264-112930374	2.443	0.007	TAL1.H12CORE.1.P.B_TAL1.H12CORE.1.P.B	Klc1	1.679	1.797	-0.117
chr12-112928264-112930374	2.443	0.007	TAL1.H12CORE.1.P.B_TAL1.H12CORE.1.P.B	Klc1	1.679	1.797	-0.117
chr10-126956471-126958161	2.681	0.004	TAL1.H12CORE.2.P.B_TAL1.H12CORE.2.P.B	Mars	0.242	0.359	-0.117
chr10-126956471-126958161	2.681	0.004	TAL1.H12CORE.2.P.B_TAL1.H12CORE.2.P.B	Mars	0.242	0.359	-0.117
chr10-127262051-127263418	-2.583	0.005	TAL1.H12CORE.1.P.B_TAL1.H12CORE.1.P.B	Mars	0.242	0.359	-0.117
chr10-127262051-127263418	-2.583	0.005	TAL1.H12CORE.1.P.B_TAL1.H12CORE.1.P.B	Mars	0.242	0.359	-0.117
chr4-126465616-126466272	-3.155	0.001	TAL1.H12CORE.1.P.B_TAL1.H12CORE.1.P.B	Trappc3	0.921	1.038	-0.117
chr4-126465616-126466272	-3.155	0.001	TAL1.H12CORE.1.P.B_TAL1.H12CORE.1.P.B	Trappc3	0.921	1.038	-0.117
chr19-41745589-41746907	-3.067	0.001	TAL1.H12CORE.2.P.B_TAL1.H12CORE.2.P.B	Lcor	0.374	0.491	-0.117
chr19-41745589-41746907	-3.067	0.001	TAL1.H12CORE.2.P.B_TAL1.H12CORE.2.P.B	Lcor	0.374	0.491	-0.117
chr8-120322598-120323576	-2.467	0.007	TAL1.H12CORE.1.P.B_TAL1.H12CORE.1.P.B	6430548M08Rik	0.116	0.232	-0.116
chr8-120322598-120323576	-2.467	0.007	TAL1.H12CORE.1.P.B_TAL1.H12CORE.1.P.B	6430548M08Rik	0.116	0.232	-0.116
chr8-120549171-120551283	2.401	0.008	TAL1.H12CORE.1.P.B_TAL1.H12CORE.1.P.B	6430548M08Rik	0.116	0.232	-0.116
chr8-120549171-120551283	2.401	0.008	TAL1.H12CORE.1.P.B_TAL1.H12CORE.1.P.B	6430548M08Rik	0.116	0.232	-0.116
chr4-117644634-117647845	3.759	0	TAL1.H12CORE.2.P.B_TAL1.H12CORE.2.P.B	Atp6v0b	2.04	2.155	-0.116
chr4-117644634-117647845	3.759	0	TAL1.H12CORE.2.P.B_TAL1.H12CORE.2.P.B	Atp6v0b	2.04	2.155	-0.116
chr19-5740703-5742696	-2.943	0.002	TAL1.H12CORE.2.P.B_TAL1.H12CORE.2.P.B	Tm7sf2	0.138	0.254	-0.115
chr19-5740703-5742696	-2.943	0.002	TAL1.H12CORE.2.P.B_TAL1.H12CORE.2.P.B	Tm7sf2	0.138	0.254	-0.115
chr9-107512052-107512833	2.619	0.004	TAL1.H12CORE.1.P.B_TAL1.H12CORE.1.P.B	Nicn1	0.45	0.566	-0.115
chr9-107512052-107512833	2.619	0.004	TAL1.H12CORE.2.P.B_TAL1.H12CORE.2.P.B	Nicn1	0.45	0.566	-0.115
chr9-107512052-107512833	2.619	0.004	TAL1.H12CORE.1.P.B_TAL1.H12CORE.1.P.B	Nicn1	0.45	0.566	-0.115
chr9-107512052-107512833	2.619	0.004	TAL1.H12CORE.2.P.B_TAL1.H12CORE.2.P.B	Nicn1	0.45	0.566	-0.115
chr10-5920794-5923513	2.579	0.005	TAL1.H12CORE.1.P.B_TAL1.H12CORE.1.P.B	Rgs17	0.229	0.343	-0.115
chr10-5920794-5923513	2.579	0.005	TAL1.H12CORE.2.P.B_TAL1.H12CORE.2.P.B	Rgs17	0.229	0.343	-0.115
chr10-5920794-5923513	2.579	0.005	TAL1.H12CORE.1.P.B_TAL1.H12CORE.1.P.B	Rgs17	0.229	0.343	-0.115
chr10-5920794-5923513	2.579	0.005	TAL1.H12CORE.2.P.B_TAL1.H12CORE.2.P.B	Rgs17	0.229	0.343	-0.115
chr7-136081310-136084487	2.696	0.004	TAL1.H12CORE.0.P.B_TAL1.H12CORE.0.P.B	Ebf3	1.215	1.329	-0.114
chr7-136081310-136084487	2.696	0.004	TAL1.H12CORE.1.P.B_TAL1.H12CORE.1.P.B	Ebf3	1.215	1.329	-0.114
chr7-136081310-136084487	2.696	0.004	TAL1.H12CORE.1.P.B_TAL1.H12CORE.1.P.B	Ebf3	1.215	1.329	-0.114
chr7-136081310-136084487	2.696	0.004	TAL1.H12CORE.2.P.B_TAL1.H12CORE.2.P.B	Ebf3	1.215	1.329	-0.114
chr7-136081310-136084487	2.696	0.004	TAL1.H12CORE.0.P.B_TAL1.H12CORE.0.P.B	Ebf3	1.215	1.329	-0.114
chr7-136081310-136084487	2.696	0.004	TAL1.H12CORE.1.P.B_TAL1.H12CORE.1.P.B	Ebf3	1.215	1.329	-0.114
chr7-136081310-136084487	2.696	0.004	TAL1.H12CORE.1.P.B_TAL1.H12CORE.1.P.B	Ebf3	1.215	1.329	-0.114
chr7-136081310-136084487	2.696	0.004	TAL1.H12CORE.2.P.B_TAL1.H12CORE.2.P.B	Ebf3	1.215	1.329	-0.114
chr15-78683248-78684517	5.769	0	TAL1.H12CORE.0.P.B_TAL1.H12CORE.0.P.B	Gga1	0.316	0.431	-0.114
chr15-78683248-78684517	5.769	0	TAL1.H12CORE.0.P.B_TAL1.H12CORE.0.P.B	Gga1	0.316	0.431	-0.114
chr1-155741611-155743304	3.572	0	TAL1.H12CORE.0.P.B_TAL1.H12CORE.0.P.B	Acbd6	0.795	0.909	-0.114
chr1-155741611-155743304	3.572	0	TAL1.H12CORE.2.P.B_TAL1.H12CORE.2.P.B	Acbd6	0.795	0.909	-0.114
chr1-155741611-155743304	3.572	0	TAL1.H12CORE.0.P.B_TAL1.H12CORE.0.P.B	Acbd6	0.795	0.909	-0.114
chr1-155741611-155743304	3.572	0	TAL1.H12CORE.2.P.B_TAL1.H12CORE.2.P.B	Acbd6	0.795	0.909	-0.114
chr4-124484553-124486586	-2.343	0.01	TAL1.H12CORE.1.P.B_TAL1.H12CORE.1.P.B	Akirin1	1.25	1.363	-0.113
chr4-124484553-124486586	-2.343	0.01	TAL1.H12CORE.2.P.B_TAL1.H12CORE.2.P.B	Akirin1	1.25	1.363	-0.113
chr4-124484553-124486586	-2.343	0.01	TAL1.H12CORE.2.P.B_TAL1.H12CORE.2.P.B	Akirin1	1.25	1.363	-0.113
chr4-124484553-124486586	-2.343	0.01	TAL1.H12CORE.2.P.B_TAL1.H12CORE.2.P.B	Akirin1	1.25	1.363	-0.113
chr4-124484553-124486586	-2.343	0.01	TAL1.H12CORE.1.P.B_TAL1.H12CORE.1.P.B	Akirin1	1.25	1.363	-0.113
chr4-124484553-124486586	-2.343	0.01	TAL1.H12CORE.2.P.B_TAL1.H12CORE.2.P.B	Akirin1	1.25	1.363	-0.113
chr4-124484553-124486586	-2.343	0.01	TAL1.H12CORE.2.P.B_TAL1.H12CORE.2.P.B	Akirin1	1.25	1.363	-0.113
chr4-124484553-124486586	-2.343	0.01	TAL1.H12CORE.2.P.B_TAL1.H12CORE.2.P.B	Akirin1	1.25	1.363	-0.113
chr1-182763444-182765240	-3.112	0.001	TAL1.H12CORE.1.P.B_TAL1.H12CORE.1.P.B	Dusp10	0.088	0.2	-0.113
chr1-182763444-182765240	-3.112	0.001	TAL1.H12CORE.2.P.B_TAL1.H12CORE.2.P.B	Dusp10	0.088	0.2	-0.113
chr1-182763444-182765240	-3.112	0.001	TAL1.H12CORE.1.P.B_TAL1.H12CORE.1.P.B	Dusp10	0.088	0.2	-0.113
chr1-182763444-182765240	-3.112	0.001	TAL1.H12CORE.2.P.B_TAL1.H12CORE.2.P.B	Dusp10	0.088	0.2	-0.113
chr4-43043784-43044423	-2.47	0.007	TAL1.H12CORE.1.P.B_TAL1.H12CORE.1.P.B	Rusc2	0.35	0.462	-0.113
chr4-43043784-43044423	-2.47	0.007	TAL1.H12CORE.1.P.B_TAL1.H12CORE.1.P.B	Rusc2	0.35	0.462	-0.113
chr4-43043784-43044423	-2.47	0.007	TAL1.H12CORE.1.P.B_TAL1.H12CORE.1.P.B	Rusc2	0.35	0.462	-0.113
chr4-43043784-43044423	-2.47	0.007	TAL1.H12CORE.1.P.B_TAL1.H12CORE.1.P.B	Rusc2	0.35	0.462	-0.113
chr7-127020606-127021656	2.786	0.003	TAL1.H12CORE.2.P.B_TAL1.H12CORE.2.P.B	Maz	1.043	1.155	-0.112
chr7-127020606-127021656	2.786	0.003	TAL1.H12CORE.2.P.B_TAL1.H12CORE.2.P.B	Maz	1.043	1.155	-0.112
chr9-56795326-56797193	-2.432	0.008	TAL1.H12CORE.1.P.B_TAL1.H12CORE.1.P.B	Imp3	0.906	1.018	-0.112
chr9-56795326-56797193	-2.432	0.008	TAL1.H12CORE.2.P.B_TAL1.H12CORE.2.P.B	Imp3	0.906	1.018	-0.112
chr9-57505347-57506328	-3.162	0.001	TAL1.H12CORE.0.P.B_TAL1.H12CORE.0.P.B	Imp3	0.906	1.018	-0.112
chr13-55171246-55172465	-3.074	0.001	TAL1.H12CORE.2.P.B_TAL1.H12CORE.2.P.B	Prelid1	1.047	1.158	-0.111
chr13-55171246-55172465	-3.074	0.001	TAL1.H12CORE.2.P.B_TAL1.H12CORE.2.P.B	Prelid1	1.047	1.158	-0.111
chr13-55171246-55172465	-3.074	0.001	TAL1.H12CORE.2.P.B_TAL1.H12CORE.2.P.B	Prelid1	1.047	1.158	-0.111
chr13-55171246-55172465	-3.074	0.001	TAL1.H12CORE.2.P.B_TAL1.H12CORE.2.P.B	Prelid1	1.047	1.158	-0.111
chr11-6604899-6606490	2.925	0.002	TAL1.H12CORE.2.P.B_TAL1.H12CORE.2.P.B	Zmiz2	0.72	0.831	-0.111
chr11-6604899-6606490	2.925	0.002	TAL1.H12CORE.2.P.B_TAL1.H12CORE.2.P.B	Zmiz2	0.72	0.831	-0.111
chr19-5740703-5742696	-2.73	0.003	TAL1.H12CORE.2.P.B_TAL1.H12CORE.2.P.B	Cfl1	4.435	4.544	-0.109
chr19-5740703-5742696	-2.73	0.003	TAL1.H12CORE.2.P.B_TAL1.H12CORE.2.P.B	Cfl1	4.435	4.544	-0.109
chr9-62531352-62532369	2.95	0.002	TAL1.H12CORE.1.P.B_TAL1.H12CORE.1.P.B	Map2k5	0.301	0.409	-0.109
chr9-62531352-62532369	2.95	0.002	TAL1.H12CORE.2.P.B_TAL1.H12CORE.2.P.B	Map2k5	0.301	0.409	-0.109
chr9-62531352-62532369	2.95	0.002	TAL1.H12CORE.2.P.B_TAL1.H12CORE.2.P.B	Map2k5	0.301	0.409	-0.109
chr9-62531352-62532369	2.95	0.002	TAL1.H12CORE.1.P.B_TAL1.H12CORE.1.P.B	Map2k5	0.301	0.409	-0.109
chr9-62531352-62532369	2.95	0.002	TAL1.H12CORE.2.P.B_TAL1.H12CORE.2.P.B	Map2k5	0.301	0.409	-0.109
chr9-62531352-62532369	2.95	0.002	TAL1.H12CORE.2.P.B_TAL1.H12CORE.2.P.B	Map2k5	0.301	0.409	-0.109
chr9-63878856-63881653	4.168	0	TAL1.H12CORE.1.P.B_TAL1.H12CORE.1.P.B	Map2k5	0.301	0.409	-0.109
chr9-63878856-63881653	4.168	0	TAL1.H12CORE.1.P.B_TAL1.H12CORE.1.P.B	Map2k5	0.301	0.409	-0.109
chr10-81142445-81143212	2.655	0.004	TAL1.H12CORE.1.P.B_TAL1.H12CORE.1.P.B	Gna11	0.78	0.889	-0.109
chr10-81142445-81143212	2.655	0.004	TAL1.H12CORE.2.P.B_TAL1.H12CORE.2.P.B	Gna11	0.78	0.889	-0.109
chr10-81142445-81143212	2.655	0.004	TAL1.H12CORE.1.P.B_TAL1.H12CORE.1.P.B	Gna11	0.78	0.889	-0.109
chr10-81142445-81143212	2.655	0.004	TAL1.H12CORE.2.P.B_TAL1.H12CORE.2.P.B	Gna11	0.78	0.889	-0.109
chr2-164856280-164858237	-2.334	0.01	TAL1.H12CORE.0.P.B_TAL1.H12CORE.0.P.B	Zmynd8	0.482	0.59	-0.108
chr2-164856280-164858237	-2.334	0.01	TAL1.H12CORE.0.P.B_TAL1.H12CORE.0.P.B	Zmynd8	0.482	0.59	-0.108
chr2-165215118-165215989	-3.22	0.001	TAL1.H12CORE.1.P.B_TAL1.H12CORE.1.P.B	Zmynd8	0.482	0.59	-0.108
chr2-165215118-165215989	-3.22	0.001	TAL1.H12CORE.2.P.B_TAL1.H12CORE.2.P.B	Zmynd8	0.482	0.59	-0.108
chr2-165215118-165215989	-3.22	0.001	TAL1.H12CORE.1.P.B_TAL1.H12CORE.1.P.B	Zmynd8	0.482	0.59	-0.108
chr2-165215118-165215989	-3.22	0.001	TAL1.H12CORE.2.P.B_TAL1.H12CORE.2.P.B	Zmynd8	0.482	0.59	-0.108
chr2-165967391-165968401	-3.034	0.001	TAL1.H12CORE.1.P.B_TAL1.H12CORE.1.P.B	Zmynd8	0.482	0.59	-0.108
chr2-165967391-165968401	-3.034	0.001	TAL1.H12CORE.1.P.B_TAL1.H12CORE.1.P.B	Zmynd8	0.482	0.59	-0.108
chr1-132199903-132201777	-2.775	0.003	TAL1.H12CORE.2.P.B_TAL1.H12CORE.2.P.B	Nucks1	1.212	1.32	-0.108
chr1-132199903-132201777	-2.775	0.003	TAL1.H12CORE.2.P.B_TAL1.H12CORE.2.P.B	Nucks1	1.212	1.32	-0.108
chr1-132281569-132282421	2.66	0.004	TAL1.H12CORE.1.P.B_TAL1.H12CORE.1.P.B	Nucks1	1.212	1.32	-0.108
chr1-132281569-132282421	2.66	0.004	TAL1.H12CORE.1.P.B_TAL1.H12CORE.1.P.B	Nucks1	1.212	1.32	-0.108
chr2-156839419-156842389	-4.959	0	TAL1.H12CORE.1.P.B_TAL1.H12CORE.1.P.B	2900097C17Rik	0.969	1.077	-0.108
chr2-156839419-156842389	-4.959	0	TAL1.H12CORE.2.P.B_TAL1.H12CORE.2.P.B	2900097C17Rik	0.969	1.077	-0.108
chr6-112807873-112810599	-2.706	0.003	TAL1.H12CORE.2.P.B_TAL1.H12CORE.2.P.B	Lhfpl4	0.24	0.347	-0.107
chr6-112807873-112810599	-2.706	0.003	TAL1.H12CORE.2.P.B_TAL1.H12CORE.2.P.B	Lhfpl4	0.24	0.347	-0.107
chr5-33721237-33723915	3.685	0	TAL1.H12CORE.1.P.B_TAL1.H12CORE.1.P.B	Slbp	0.505	0.612	-0.107
chr5-33721237-33723915	3.685	0	TAL1.H12CORE.1.P.B_TAL1.H12CORE.1.P.B	Slbp	0.505	0.612	-0.107
chr18-35918449-35921558	-2.421	0.008	TAL1.H12CORE.1.P.B_TAL1.H12CORE.1.P.B	Pura	0.508	0.615	-0.106
chr18-35918449-35921558	-2.421	0.008	TAL1.H12CORE.1.P.B_TAL1.H12CORE.1.P.B	Pura	0.508	0.615	-0.106
chr18-35918449-35921558	-2.421	0.008	TAL1.H12CORE.1.P.B_TAL1.H12CORE.1.P.B	Pura	0.508	0.615	-0.106
chr18-35918449-35921558	-2.421	0.008	TAL1.H12CORE.2.P.B_TAL1.H12CORE.2.P.B	Pura	0.508	0.615	-0.106
chr18-35918449-35921558	-2.421	0.008	TAL1.H12CORE.2.P.B_TAL1.H12CORE.2.P.B	Pura	0.508	0.615	-0.106
chr18-35918449-35921558	-2.421	0.008	TAL1.H12CORE.2.P.B_TAL1.H12CORE.2.P.B	Pura	0.508	0.615	-0.106
chr18-35918449-35921558	-2.421	0.008	TAL1.H12CORE.1.P.B_TAL1.H12CORE.1.P.B	Pura	0.508	0.615	-0.106
chr18-35918449-35921558	-2.421	0.008	TAL1.H12CORE.1.P.B_TAL1.H12CORE.1.P.B	Pura	0.508	0.615	-0.106
chr18-35918449-35921558	-2.421	0.008	TAL1.H12CORE.1.P.B_TAL1.H12CORE.1.P.B	Pura	0.508	0.615	-0.106
chr18-35918449-35921558	-2.421	0.008	TAL1.H12CORE.2.P.B_TAL1.H12CORE.2.P.B	Pura	0.508	0.615	-0.106
chr18-35918449-35921558	-2.421	0.008	TAL1.H12CORE.2.P.B_TAL1.H12CORE.2.P.B	Pura	0.508	0.615	-0.106
chr18-35918449-35921558	-2.421	0.008	TAL1.H12CORE.2.P.B_TAL1.H12CORE.2.P.B	Pura	0.508	0.615	-0.106
chr7-19092268-19096048	-4.106	0	TAL1.H12CORE.1.P.B_TAL1.H12CORE.1.P.B	Rtn2	0.738	0.844	-0.106
chr7-19092268-19096048	-4.106	0	TAL1.H12CORE.1.P.B_TAL1.H12CORE.1.P.B	Rtn2	0.738	0.844	-0.106
chr7-19092268-19096048	-4.106	0	TAL1.H12CORE.2.P.B_TAL1.H12CORE.2.P.B	Rtn2	0.738	0.844	-0.106
chr7-19092268-19096048	-4.106	0	TAL1.H12CORE.1.P.B_TAL1.H12CORE.1.P.B	Rtn2	0.738	0.844	-0.106
chr7-19092268-19096048	-4.106	0	TAL1.H12CORE.1.P.B_TAL1.H12CORE.1.P.B	Rtn2	0.738	0.844	-0.106
chr7-19092268-19096048	-4.106	0	TAL1.H12CORE.2.P.B_TAL1.H12CORE.2.P.B	Rtn2	0.738	0.844	-0.106
chr10-127511309-127512486	3.578	0	TAL1.H12CORE.1.P.B_TAL1.H12CORE.1.P.B	Nxph4	0.011	0.116	-0.106
chr10-127511309-127512486	3.578	0	TAL1.H12CORE.1.P.B_TAL1.H12CORE.1.P.B	Nxph4	0.011	0.116	-0.106
chr10-127511309-127512486	3.578	0	TAL1.H12CORE.1.P.B_TAL1.H12CORE.1.P.B	Nxph4	0.011	0.116	-0.106
chr10-127511309-127512486	3.578	0	TAL1.H12CORE.1.P.B_TAL1.H12CORE.1.P.B	Nxph4	0.011	0.116	-0.106
chr15-81802035-81803269	-3.288	0.001	TAL1.H12CORE.1.P.B_TAL1.H12CORE.1.P.B	Cyb5r3	0.65	0.756	-0.106
chr15-81802035-81803269	-3.288	0.001	TAL1.H12CORE.1.P.B_TAL1.H12CORE.1.P.B	Cyb5r3	0.65	0.756	-0.106
chr15-81802035-81803269	-3.288	0.001	TAL1.H12CORE.1.P.B_TAL1.H12CORE.1.P.B	Cyb5r3	0.65	0.756	-0.106
chr15-81802035-81803269	-3.288	0.001	TAL1.H12CORE.2.P.B_TAL1.H12CORE.2.P.B	Cyb5r3	0.65	0.756	-0.106
chr15-81802035-81803269	-3.288	0.001	TAL1.H12CORE.1.P.B_TAL1.H12CORE.1.P.B	Cyb5r3	0.65	0.756	-0.106
chr15-81802035-81803269	-3.288	0.001	TAL1.H12CORE.1.P.B_TAL1.H12CORE.1.P.B	Cyb5r3	0.65	0.756	-0.106
chr15-81802035-81803269	-3.288	0.001	TAL1.H12CORE.1.P.B_TAL1.H12CORE.1.P.B	Cyb5r3	0.65	0.756	-0.106
chr15-81802035-81803269	-3.288	0.001	TAL1.H12CORE.2.P.B_TAL1.H12CORE.2.P.B	Cyb5r3	0.65	0.756	-0.106
chr15-82920801-82922678	-2.34	0.01	TAL1.H12CORE.1.P.B_TAL1.H12CORE.1.P.B	Cyb5r3	0.65	0.756	-0.106
chr15-82920801-82922678	-2.34	0.01	TAL1.H12CORE.2.P.B_TAL1.H12CORE.2.P.B	Cyb5r3	0.65	0.756	-0.106
chr15-82920801-82922678	-2.34	0.01	TAL1.H12CORE.2.P.B_TAL1.H12CORE.2.P.B	Cyb5r3	0.65	0.756	-0.106
chr15-82920801-82922678	-2.34	0.01	TAL1.H12CORE.1.P.B_TAL1.H12CORE.1.P.B	Cyb5r3	0.65	0.756	-0.106
chr15-82920801-82922678	-2.34	0.01	TAL1.H12CORE.2.P.B_TAL1.H12CORE.2.P.B	Cyb5r3	0.65	0.756	-0.106
chr15-82920801-82922678	-2.34	0.01	TAL1.H12CORE.2.P.B_TAL1.H12CORE.2.P.B	Cyb5r3	0.65	0.756	-0.106
chr15-84417005-84418430	-2.745	0.003	TAL1.H12CORE.1.P.B_TAL1.H12CORE.1.P.B	Cyb5r3	0.65	0.756	-0.106
chr15-84417005-84418430	-2.745	0.003	TAL1.H12CORE.1.P.B_TAL1.H12CORE.1.P.B	Cyb5r3	0.65	0.756	-0.106
chr6-124463470-124465237	2.739	0.003	TAL1.H12CORE.1.P.B_TAL1.H12CORE.1.P.B	Mlf2	1.638	1.744	-0.106
chr6-124463470-124465237	2.739	0.003	TAL1.H12CORE.2.P.B_TAL1.H12CORE.2.P.B	Mlf2	1.638	1.744	-0.106
chr6-124463470-124465237	2.739	0.003	TAL1.H12CORE.1.P.B_TAL1.H12CORE.1.P.B	Mlf2	1.638	1.744	-0.106
chr6-124463470-124465237	2.739	0.003	TAL1.H12CORE.2.P.B_TAL1.H12CORE.2.P.B	Mlf2	1.638	1.744	-0.106
chr12-111693349-111695473	-4.796	0	TAL1.H12CORE.2.P.B_TAL1.H12CORE.2.P.B	Jag2	0.019	0.124	-0.105
chr12-111693349-111695473	-4.796	0	TAL1.H12CORE.2.P.B_TAL1.H12CORE.2.P.B	Jag2	0.019	0.124	-0.105
chr12-112663199-112664804	-2.801	0.003	TAL1.H12CORE.1.P.B_TAL1.H12CORE.1.P.B	Jag2	0.019	0.124	-0.105
chr12-112663199-112664804	-2.801	0.003	TAL1.H12CORE.2.P.B_TAL1.H12CORE.2.P.B	Jag2	0.019	0.124	-0.105
chr12-112663199-112664804	-2.801	0.003	TAL1.H12CORE.1.P.B_TAL1.H12CORE.1.P.B	Jag2	0.019	0.124	-0.105
chr12-112663199-112664804	-2.801	0.003	TAL1.H12CORE.2.P.B_TAL1.H12CORE.2.P.B	Jag2	0.019	0.124	-0.105
chr12-112665319-112665858	-2.357	0.009	TAL1.H12CORE.1.P.B_TAL1.H12CORE.1.P.B	Jag2	0.019	0.124	-0.105
chr12-112665319-112665858	-2.357	0.009	TAL1.H12CORE.2.P.B_TAL1.H12CORE.2.P.B	Jag2	0.019	0.124	-0.105
chr12-112665319-112665858	-2.357	0.009	TAL1.H12CORE.1.P.B_TAL1.H12CORE.1.P.B	Jag2	0.019	0.124	-0.105
chr12-112665319-112665858	-2.357	0.009	TAL1.H12CORE.2.P.B_TAL1.H12CORE.2.P.B	Jag2	0.019	0.124	-0.105
chr12-112928264-112930374	2.559	0.005	TAL1.H12CORE.1.P.B_TAL1.H12CORE.1.P.B	Jag2	0.019	0.124	-0.105
chr12-112928264-112930374	2.559	0.005	TAL1.H12CORE.1.P.B_TAL1.H12CORE.1.P.B	Jag2	0.019	0.124	-0.105
chr7-34312657-34314036	-2.351	0.009	TAL1.H12CORE.0.P.B_TAL1.H12CORE.0.P.B	Uba2	1.121	1.226	-0.105
chr7-34312657-34314036	-2.351	0.009	TAL1.H12CORE.1.P.B_TAL1.H12CORE.1.P.B	Uba2	1.121	1.226	-0.105
chr7-34312657-34314036	-2.351	0.009	TAL1.H12CORE.0.P.B_TAL1.H12CORE.0.P.B	Uba2	1.121	1.226	-0.105
chr7-34312657-34314036	-2.351	0.009	TAL1.H12CORE.1.P.B_TAL1.H12CORE.1.P.B	Uba2	1.121	1.226	-0.105
chr7-34629601-34631112	3.02	0.001	TAL1.H12CORE.2.P.B_TAL1.H12CORE.2.P.B	Uba2	1.121	1.226	-0.105
chr7-34629601-34631112	3.02	0.001	TAL1.H12CORE.2.P.B_TAL1.H12CORE.2.P.B	Uba2	1.121	1.226	-0.105
chr7-34938432-34940388	2.595	0.005	TAL1.H12CORE.2.P.B_TAL1.H12CORE.2.P.B	Uba2	1.121	1.226	-0.105
chr7-34938432-34940388	2.595	0.005	TAL1.H12CORE.2.P.B_TAL1.H12CORE.2.P.B	Uba2	1.121	1.226	-0.105
chr1-75445085-75447030	2.71	0.003	TAL1.H12CORE.0.P.B_TAL1.H12CORE.0.P.B	Tmem198	0.578	0.682	-0.104
chr1-75445085-75447030	2.71	0.003	TAL1.H12CORE.1.P.B_TAL1.H12CORE.1.P.B	Tmem198	0.578	0.682	-0.104
chr1-75445085-75447030	2.71	0.003	TAL1.H12CORE.1.P.B_TAL1.H12CORE.1.P.B	Tmem198	0.578	0.682	-0.104
chr1-75445085-75447030	2.71	0.003	TAL1.H12CORE.2.P.B_TAL1.H12CORE.2.P.B	Tmem198	0.578	0.682	-0.104
chr1-75445085-75447030	2.71	0.003	TAL1.H12CORE.0.P.B_TAL1.H12CORE.0.P.B	Tmem198	0.578	0.682	-0.104
chr1-75445085-75447030	2.71	0.003	TAL1.H12CORE.1.P.B_TAL1.H12CORE.1.P.B	Tmem198	0.578	0.682	-0.104
chr1-75445085-75447030	2.71	0.003	TAL1.H12CORE.1.P.B_TAL1.H12CORE.1.P.B	Tmem198	0.578	0.682	-0.104
chr1-75445085-75447030	2.71	0.003	TAL1.H12CORE.2.P.B_TAL1.H12CORE.2.P.B	Tmem198	0.578	0.682	-0.104
chr1-75448932-75450868	2.68	0.004	TAL1.H12CORE.0.P.B_TAL1.H12CORE.0.P.B	Tmem198	0.578	0.682	-0.104
chr1-75448932-75450868	2.68	0.004	TAL1.H12CORE.1.P.B_TAL1.H12CORE.1.P.B	Tmem198	0.578	0.682	-0.104
chr1-75448932-75450868	2.68	0.004	TAL1.H12CORE.2.P.B_TAL1.H12CORE.2.P.B	Tmem198	0.578	0.682	-0.104
chr1-75448932-75450868	2.68	0.004	TAL1.H12CORE.0.P.B_TAL1.H12CORE.0.P.B	Tmem198	0.578	0.682	-0.104
chr1-75448932-75450868	2.68	0.004	TAL1.H12CORE.1.P.B_TAL1.H12CORE.1.P.B	Tmem198	0.578	0.682	-0.104
chr1-75448932-75450868	2.68	0.004	TAL1.H12CORE.2.P.B_TAL1.H12CORE.2.P.B	Tmem198	0.578	0.682	-0.104
chr2-31448612-31449951	-2.536	0.006	TAL1.H12CORE.2.P.B_TAL1.H12CORE.2.P.B	Dpm2	0.791	0.896	-0.104
chr2-31448612-31449951	-2.536	0.006	TAL1.H12CORE.2.P.B_TAL1.H12CORE.2.P.B	Dpm2	0.791	0.896	-0.104
chr2-31636217-31637206	-3.047	0.001	TAL1.H12CORE.1.P.B_TAL1.H12CORE.1.P.B	Dpm2	0.791	0.896	-0.104
chr2-31636217-31637206	-3.047	0.001	TAL1.H12CORE.1.P.B_TAL1.H12CORE.1.P.B	Dpm2	0.791	0.896	-0.104
chr2-32322474-32323716	2.756	0.003	TAL1.H12CORE.2.P.B_TAL1.H12CORE.2.P.B	Dpm2	0.791	0.896	-0.104
chr2-32322474-32323716	2.756	0.003	TAL1.H12CORE.2.P.B_TAL1.H12CORE.2.P.B	Dpm2	0.791	0.896	-0.104
chr7-99474023-99475435	3.637	0	TAL1.H12CORE.0.P.B_TAL1.H12CORE.0.P.B	Emsy	0.665	0.769	-0.104
chr7-99474023-99475435	3.637	0	TAL1.H12CORE.0.P.B_TAL1.H12CORE.0.P.B	Emsy	0.665	0.769	-0.104
chr9-21243833-21245325	2.765	0.003	TAL1.H12CORE.1.P.B_TAL1.H12CORE.1.P.B	Timm29	0.404	0.508	-0.104
chr9-21243833-21245325	2.765	0.003	TAL1.H12CORE.1.P.B_TAL1.H12CORE.1.P.B	Timm29	0.404	0.508	-0.104
chr9-21243833-21245325	4.538	0	TAL1.H12CORE.1.P.B_TAL1.H12CORE.1.P.B	Carm1	0.332	0.436	-0.104
chr9-21243833-21245325	4.538	0	TAL1.H12CORE.1.P.B_TAL1.H12CORE.1.P.B	Carm1	0.332	0.436	-0.104
chr13-71506959-71508541	-3.889	0	TAL1.H12CORE.1.P.B_TAL1.H12CORE.1.P.B	Ice1	0.324	0.427	-0.104
chr13-71506959-71508541	-3.889	0	TAL1.H12CORE.2.P.B_TAL1.H12CORE.2.P.B	Ice1	0.324	0.427	-0.104
chr13-71506959-71508541	-3.889	0	TAL1.H12CORE.1.P.B_TAL1.H12CORE.1.P.B	Ice1	0.324	0.427	-0.104
chr13-71506959-71508541	-3.889	0	TAL1.H12CORE.2.P.B_TAL1.H12CORE.2.P.B	Ice1	0.324	0.427	-0.104
chr2-180890250-180891665	2.401	0.008	TAL1.H12CORE.2.P.B_TAL1.H12CORE.2.P.B	Chrna4	0.052	0.155	-0.103
chr2-180890250-180891665	2.401	0.008	TAL1.H12CORE.2.P.B_TAL1.H12CORE.2.P.B	Chrna4	0.052	0.155	-0.103
chr2-31636217-31637206	-2.978	0.001	TAL1.H12CORE.1.P.B_TAL1.H12CORE.1.P.B	Prrc2b	0.835	0.938	-0.103
chr2-31636217-31637206	-2.978	0.001	TAL1.H12CORE.1.P.B_TAL1.H12CORE.1.P.B	Prrc2b	0.835	0.938	-0.103
chr2-32322474-32323716	3.502	0	TAL1.H12CORE.2.P.B_TAL1.H12CORE.2.P.B	Prrc2b	0.835	0.938	-0.103
chr2-32322474-32323716	3.502	0	TAL1.H12CORE.2.P.B_TAL1.H12CORE.2.P.B	Prrc2b	0.835	0.938	-0.103
chr2-32740700-32742637	2.407	0.008	TAL1.H12CORE.1.P.B_TAL1.H12CORE.1.P.B	Prrc2b	0.835	0.938	-0.103
chr2-32740700-32742637	2.407	0.008	TAL1.H12CORE.1.P.B_TAL1.H12CORE.1.P.B	Prrc2b	0.835	0.938	-0.103
chr15-99094539-99095027	-2.657	0.004	TAL1.H12CORE.1.P.B_TAL1.H12CORE.1.P.B	Arf3	0.31	0.413	-0.103
chr15-99094539-99095027	-2.657	0.004	TAL1.H12CORE.1.P.B_TAL1.H12CORE.1.P.B	Arf3	0.31	0.413	-0.103
chr15-98001077-98005045	3.012	0.001	TAL1.H12CORE.1.P.B_TAL1.H12CORE.1.P.B	Tuba1b	1.587	1.69	-0.103
chr15-98001077-98005045	3.012	0.001	TAL1.H12CORE.1.P.B_TAL1.H12CORE.1.P.B	Tuba1b	1.587	1.69	-0.103
chr15-99094539-99095027	3.675	0	TAL1.H12CORE.1.P.B_TAL1.H12CORE.1.P.B	Tuba1b	1.587	1.69	-0.103
chr15-99094539-99095027	3.675	0	TAL1.H12CORE.1.P.B_TAL1.H12CORE.1.P.B	Tuba1b	1.587	1.69	-0.103
chr15-99663969-99665409	-3.425	0	TAL1.H12CORE.0.P.B_TAL1.H12CORE.0.P.B	Tuba1b	1.587	1.69	-0.103
chr15-99663969-99665409	-3.425	0	TAL1.H12CORE.0.P.B_TAL1.H12CORE.0.P.B	Tuba1b	1.587	1.69	-0.103
chr15-99663969-99665409	-3.425	0	TAL1.H12CORE.1.P.B_TAL1.H12CORE.1.P.B	Tuba1b	1.587	1.69	-0.103
chr15-99663969-99665409	-3.425	0	TAL1.H12CORE.0.P.B_TAL1.H12CORE.0.P.B	Tuba1b	1.587	1.69	-0.103
chr15-99663969-99665409	-3.425	0	TAL1.H12CORE.0.P.B_TAL1.H12CORE.0.P.B	Tuba1b	1.587	1.69	-0.103
chr15-99663969-99665409	-3.425	0	TAL1.H12CORE.1.P.B_TAL1.H12CORE.1.P.B	Tuba1b	1.587	1.69	-0.103
chr2-31448612-31449951	2.965	0.002	TAL1.H12CORE.2.P.B_TAL1.H12CORE.2.P.B	Uck1	0.382	0.485	-0.103
chr2-31448612-31449951	2.965	0.002	TAL1.H12CORE.2.P.B_TAL1.H12CORE.2.P.B	Uck1	0.382	0.485	-0.103
chr2-33129681-33132076	-3.073	0.001	TAL1.H12CORE.1.P.B_TAL1.H12CORE.1.P.B	Uck1	0.382	0.485	-0.103
chr2-33129681-33132076	-3.073	0.001	TAL1.H12CORE.2.P.B_TAL1.H12CORE.2.P.B	Uck1	0.382	0.485	-0.103
chr2-33129681-33132076	-3.073	0.001	TAL1.H12CORE.1.P.B_TAL1.H12CORE.1.P.B	Uck1	0.382	0.485	-0.103
chr2-33129681-33132076	-3.073	0.001	TAL1.H12CORE.2.P.B_TAL1.H12CORE.2.P.B	Uck1	0.382	0.485	-0.103
chr4-134449770-134451235	2.772	0.003	TAL1.H12CORE.0.P.B_TAL1.H12CORE.0.P.B	Pdik1l	0.325	0.428	-0.103
chr4-134449770-134451235	2.772	0.003	TAL1.H12CORE.2.P.B_TAL1.H12CORE.2.P.B	Pdik1l	0.325	0.428	-0.103
chr4-134449770-134451235	2.772	0.003	TAL1.H12CORE.0.P.B_TAL1.H12CORE.0.P.B	Pdik1l	0.325	0.428	-0.103
chr4-134449770-134451235	2.772	0.003	TAL1.H12CORE.2.P.B_TAL1.H12CORE.2.P.B	Pdik1l	0.325	0.428	-0.103
chr7-79524703-79526621	-3.276	0.001	TAL1.H12CORE.1.P.B_TAL1.H12CORE.1.P.B	Hddc3	0.454	0.556	-0.102
chr7-79524703-79526621	-3.276	0.001	TAL1.H12CORE.2.P.B_TAL1.H12CORE.2.P.B	Hddc3	0.454	0.556	-0.102
chr7-79524703-79526621	-3.276	0.001	TAL1.H12CORE.2.P.B_TAL1.H12CORE.2.P.B	Hddc3	0.454	0.556	-0.102
chr7-79524703-79526621	-3.276	0.001	TAL1.H12CORE.1.P.B_TAL1.H12CORE.1.P.B	Hddc3	0.454	0.556	-0.102
chr7-79524703-79526621	-3.276	0.001	TAL1.H12CORE.2.P.B_TAL1.H12CORE.2.P.B	Hddc3	0.454	0.556	-0.102
chr7-79524703-79526621	-3.276	0.001	TAL1.H12CORE.2.P.B_TAL1.H12CORE.2.P.B	Hddc3	0.454	0.556	-0.102
chr3-94477394-94479158	2.461	0.007	TAL1.H12CORE.2.P.B_TAL1.H12CORE.2.P.B	Celf3	1.397	1.499	-0.102
chr3-94477394-94479158	2.461	0.007	TAL1.H12CORE.2.P.B_TAL1.H12CORE.2.P.B	Celf3	1.397	1.499	-0.102
chr12-4132535-4134134	-2.415	0.008	TAL1.H12CORE.1.P.B_TAL1.H12CORE.1.P.B	Pomc	0.172	0.274	-0.102
chr12-4132535-4134134	-2.415	0.008	TAL1.H12CORE.1.P.B_TAL1.H12CORE.1.P.B	Pomc	0.172	0.274	-0.102
chr19-7067844-7069424	-2.841	0.002	TAL1.H12CORE.1.P.B_TAL1.H12CORE.1.P.B	Vegfb	0.202	0.303	-0.101
chr19-7067844-7069424	-2.841	0.002	TAL1.H12CORE.2.P.B_TAL1.H12CORE.2.P.B	Vegfb	0.202	0.303	-0.101
chr19-7067844-7069424	-2.841	0.002	TAL1.H12CORE.1.P.B_TAL1.H12CORE.1.P.B	Vegfb	0.202	0.303	-0.101
chr19-7067844-7069424	-2.841	0.002	TAL1.H12CORE.2.P.B_TAL1.H12CORE.2.P.B	Vegfb	0.202	0.303	-0.101
chr19-7101828-7102926	-2.957	0.002	TAL1.H12CORE.1.P.B_TAL1.H12CORE.1.P.B	Vegfb	0.202	0.303	-0.101
chr19-7101828-7102926	-2.957	0.002	TAL1.H12CORE.1.P.B_TAL1.H12CORE.1.P.B	Vegfb	0.202	0.303	-0.101
chr19-7265572-7266459	-2.465	0.007	TAL1.H12CORE.1.P.B_TAL1.H12CORE.1.P.B	Vegfb	0.202	0.303	-0.101
chr19-7265572-7266459	-2.465	0.007	TAL1.H12CORE.2.P.B_TAL1.H12CORE.2.P.B	Vegfb	0.202	0.303	-0.101
chr19-7265572-7266459	-2.465	0.007	TAL1.H12CORE.1.P.B_TAL1.H12CORE.1.P.B	Vegfb	0.202	0.303	-0.101
chr19-7265572-7266459	-2.465	0.007	TAL1.H12CORE.2.P.B_TAL1.H12CORE.2.P.B	Vegfb	0.202	0.303	-0.101
chr8-70656073-70657064	-4.273	0	TAL1.H12CORE.1.P.B_TAL1.H12CORE.1.P.B	Armc6	0.228	0.329	-0.101
chr8-70656073-70657064	-4.273	0	TAL1.H12CORE.1.P.B_TAL1.H12CORE.1.P.B	Armc6	0.228	0.329	-0.101
chr8-122719602-122721611	2.395	0.008	TAL1.H12CORE.0.P.B_TAL1.H12CORE.0.P.B	Vps9d1	0.479	0.58	-0.101
chr8-122719602-122721611	2.395	0.008	TAL1.H12CORE.0.P.B_TAL1.H12CORE.0.P.B	Vps9d1	0.479	0.58	-0.101
chr8-122719602-122721611	2.395	0.008	TAL1.H12CORE.0.P.B_TAL1.H12CORE.0.P.B	Vps9d1	0.479	0.58	-0.101
chr8-122719602-122721611	2.395	0.008	TAL1.H12CORE.0.P.B_TAL1.H12CORE.0.P.B	Vps9d1	0.479	0.58	-0.101
chr1-134062123-134064029	-2.527	0.006	TAL1.H12CORE.1.P.B_TAL1.H12CORE.1.P.B	Chil1	0.077	0.178	-0.1
chr1-134062123-134064029	-2.527	0.006	TAL1.H12CORE.2.P.B_TAL1.H12CORE.2.P.B	Chil1	0.077	0.178	-0.1
chr1-134062123-134064029	-2.527	0.006	TAL1.H12CORE.1.P.B_TAL1.H12CORE.1.P.B	Chil1	0.077	0.178	-0.1
chr1-134062123-134064029	-2.527	0.006	TAL1.H12CORE.2.P.B_TAL1.H12CORE.2.P.B	Chil1	0.077	0.178	-0.1
chr1-134713244-134714452	-2.928	0.002	TAL1.H12CORE.1.P.B_TAL1.H12CORE.1.P.B	Chil1	0.077	0.178	-0.1
chr1-134713244-134714452	-2.928	0.002	TAL1.H12CORE.2.P.B_TAL1.H12CORE.2.P.B	Chil1	0.077	0.178	-0.1
chr1-134713244-134714452	-2.928	0.002	TAL1.H12CORE.1.P.B_TAL1.H12CORE.1.P.B	Chil1	0.077	0.178	-0.1
chr1-134713244-134714452	-2.928	0.002	TAL1.H12CORE.2.P.B_TAL1.H12CORE.2.P.B	Chil1	0.077	0.178	-0.1
chr11-120261084-120262893	-3.712	0	TAL1.H12CORE.2.P.B_TAL1.H12CORE.2.P.B	Actg1	5.77	5.87	-0.1
chr11-120261084-120262893	-3.712	0	TAL1.H12CORE.2.P.B_TAL1.H12CORE.2.P.B	Actg1	5.77	5.87	-0.1
chr16-21338930-21340519	-4.215	0	TAL1.H12CORE.2.P.B_TAL1.H12CORE.2.P.B	Fam131a	0.214	0.314	-0.1
chr16-21338930-21340519	-4.215	0	TAL1.H12CORE.2.P.B_TAL1.H12CORE.2.P.B	Fam131a	0.214	0.314	-0.1
chr12-52834776-52836573	3.583	0	TAL1.H12CORE.2.P.B_TAL1.H12CORE.2.P.B	Npas3	0.345	0.445	-0.1
chr12-52834776-52836573	3.583	0	TAL1.H12CORE.2.P.B_TAL1.H12CORE.2.P.B	Npas3	0.345	0.445	-0.1
chr10-80259789-80261976	-3.349	0	TAL1.H12CORE.2.P.B_TAL1.H12CORE.2.P.B	R3hdm4	0.851	0.951	-0.1
chr10-80259789-80261976	-3.349	0	TAL1.H12CORE.2.P.B_TAL1.H12CORE.2.P.B	R3hdm4	0.851	0.951	-0.1
chr11-117967780-117970155	-2.53	0.006	TAL1.H12CORE.2.P.B_TAL1.H12CORE.2.P.B	Cyth1	0.319	0.419	-0.1
chr11-117967780-117970155	-2.53	0.006	TAL1.H12CORE.2.P.B_TAL1.H12CORE.2.P.B	Cyth1	0.319	0.419	-0.1
chr4-117644634-117647845	-3.715	0	TAL1.H12CORE.2.P.B_TAL1.H12CORE.2.P.B	Ptprf	0.677	0.776	-0.1
chr4-117644634-117647845	-3.715	0	TAL1.H12CORE.2.P.B_TAL1.H12CORE.2.P.B	Ptprf	0.677	0.776	-0.1
chr6-88973625-88974892	3.214	0.001	TAL1.H12CORE.1.P.B_TAL1.H12CORE.1.P.B	Abtb1	0.132	0.232	-0.1
chr6-88973625-88974892	3.214	0.001	TAL1.H12CORE.2.P.B_TAL1.H12CORE.2.P.B	Abtb1	0.132	0.232	-0.1
chr6-88973625-88974892	3.214	0.001	TAL1.H12CORE.1.P.B_TAL1.H12CORE.1.P.B	Abtb1	0.132	0.232	-0.1
chr6-88973625-88974892	3.214	0.001	TAL1.H12CORE.2.P.B_TAL1.H12CORE.2.P.B	Abtb1	0.132	0.232	-0.1
chr10-81142445-81143212	-3.733	0	TAL1.H12CORE.1.P.B_TAL1.H12CORE.1.P.B	Bsg	1.801	1.9	-0.099
chr10-81142445-81143212	-3.733	0	TAL1.H12CORE.2.P.B_TAL1.H12CORE.2.P.B	Bsg	1.801	1.9	-0.099
chr10-81142445-81143212	-3.733	0	TAL1.H12CORE.1.P.B_TAL1.H12CORE.1.P.B	Bsg	1.801	1.9	-0.099
chr10-81142445-81143212	-3.733	0	TAL1.H12CORE.2.P.B_TAL1.H12CORE.2.P.B	Bsg	1.801	1.9	-0.099
chr10-80295531-80296343	-2.37	0.009	TAL1.H12CORE.2.P.B_TAL1.H12CORE.2.P.B	Mrpl54	0.868	0.967	-0.099
chr10-80295531-80296343	-2.37	0.009	TAL1.H12CORE.2.P.B_TAL1.H12CORE.2.P.B	Mrpl54	0.868	0.967	-0.099
chr11-120261084-120262893	3.342	0	TAL1.H12CORE.2.P.B_TAL1.H12CORE.2.P.B	Fasn	0.501	0.599	-0.098
chr11-120261084-120262893	3.342	0	TAL1.H12CORE.2.P.B_TAL1.H12CORE.2.P.B	Fasn	0.501	0.599	-0.098
chr9-121809249-121810931	-2.408	0.008	TAL1.H12CORE.1.P.B_TAL1.H12CORE.1.P.B	1110059G10Rik	0.382	0.48	-0.098
chr9-121809249-121810931	-2.408	0.008	TAL1.H12CORE.2.P.B_TAL1.H12CORE.2.P.B	1110059G10Rik	0.382	0.48	-0.098
chr9-121809249-121810931	-2.408	0.008	TAL1.H12CORE.1.P.B_TAL1.H12CORE.1.P.B	1110059G10Rik	0.382	0.48	-0.098
chr9-121809249-121810931	-2.408	0.008	TAL1.H12CORE.2.P.B_TAL1.H12CORE.2.P.B	1110059G10Rik	0.382	0.48	-0.098
chr1-166282391-166283148	-3.61	0	TAL1.H12CORE.2.P.B_TAL1.H12CORE.2.P.B	Fam78b	0.09	0.188	-0.098
chr1-166282391-166283148	-3.61	0	TAL1.H12CORE.2.P.B_TAL1.H12CORE.2.P.B	Fam78b	0.09	0.188	-0.098
chr1-134062123-134064029	-4.099	0	TAL1.H12CORE.1.P.B_TAL1.H12CORE.1.P.B	Rnpep	0.271	0.369	-0.098
chr1-134062123-134064029	-4.099	0	TAL1.H12CORE.2.P.B_TAL1.H12CORE.2.P.B	Rnpep	0.271	0.369	-0.098
chr1-134062123-134064029	-4.099	0	TAL1.H12CORE.1.P.B_TAL1.H12CORE.1.P.B	Rnpep	0.271	0.369	-0.098
chr1-134062123-134064029	-4.099	0	TAL1.H12CORE.2.P.B_TAL1.H12CORE.2.P.B	Rnpep	0.271	0.369	-0.098
chr1-134713244-134714452	-2.93	0.002	TAL1.H12CORE.1.P.B_TAL1.H12CORE.1.P.B	Rnpep	0.271	0.369	-0.098
chr1-134713244-134714452	-2.93	0.002	TAL1.H12CORE.2.P.B_TAL1.H12CORE.2.P.B	Rnpep	0.271	0.369	-0.098
chr1-134713244-134714452	-2.93	0.002	TAL1.H12CORE.1.P.B_TAL1.H12CORE.1.P.B	Rnpep	0.271	0.369	-0.098
chr1-134713244-134714452	-2.93	0.002	TAL1.H12CORE.2.P.B_TAL1.H12CORE.2.P.B	Rnpep	0.271	0.369	-0.098
chr7-25007588-25009656	3.314	0	TAL1.H12CORE.1.P.B_TAL1.H12CORE.1.P.B	Grik5	0.303	0.401	-0.098
chr7-25007588-25009656	3.314	0	TAL1.H12CORE.1.P.B_TAL1.H12CORE.1.P.B	Grik5	0.303	0.401	-0.098
chr7-25007588-25009656	3.314	0	TAL1.H12CORE.2.P.B_TAL1.H12CORE.2.P.B	Grik5	0.303	0.401	-0.098
chr7-25007588-25009656	3.314	0	TAL1.H12CORE.2.P.B_TAL1.H12CORE.2.P.B	Grik5	0.303	0.401	-0.098
chr7-25007588-25009656	3.314	0	TAL1.H12CORE.1.P.B_TAL1.H12CORE.1.P.B	Grik5	0.303	0.401	-0.098
chr7-25007588-25009656	3.314	0	TAL1.H12CORE.1.P.B_TAL1.H12CORE.1.P.B	Grik5	0.303	0.401	-0.098
chr7-25007588-25009656	3.314	0	TAL1.H12CORE.2.P.B_TAL1.H12CORE.2.P.B	Grik5	0.303	0.401	-0.098
chr7-25007588-25009656	3.314	0	TAL1.H12CORE.2.P.B_TAL1.H12CORE.2.P.B	Grik5	0.303	0.401	-0.098
chr2-91456927-91459520	-3.414	0	TAL1.H12CORE.2.P.B_TAL1.H12CORE.2.P.B	A330069E16Rik	0.097	0.195	-0.097
chr2-91456927-91459520	-3.414	0	TAL1.H12CORE.2.P.B_TAL1.H12CORE.2.P.B	A330069E16Rik	0.097	0.195	-0.097
chr2-91456927-91459520	-3.414	0	TAL1.H12CORE.2.P.B_TAL1.H12CORE.2.P.B	A330069E16Rik	0.097	0.195	-0.097
chr2-91456927-91459520	-3.414	0	TAL1.H12CORE.2.P.B_TAL1.H12CORE.2.P.B	A330069E16Rik	0.097	0.195	-0.097
chr12-111693349-111695473	-4.65	0	TAL1.H12CORE.2.P.B_TAL1.H12CORE.2.P.B	Dio3	0	0.097	-0.097
chr18-5427369-5429046	3.201	0.001	TAL1.H12CORE.1.P.B_TAL1.H12CORE.1.P.B	Kif5b	1.387	1.484	-0.097
chr18-5427369-5429046	3.201	0.001	TAL1.H12CORE.1.P.B_TAL1.H12CORE.1.P.B	Kif5b	1.387	1.484	-0.097
chr18-5427369-5429046	3.201	0.001	TAL1.H12CORE.1.P.B_TAL1.H12CORE.1.P.B	Kif5b	1.387	1.484	-0.097
chr18-5427369-5429046	3.201	0.001	TAL1.H12CORE.2.P.B_TAL1.H12CORE.2.P.B	Kif5b	1.387	1.484	-0.097
chr18-5427369-5429046	3.201	0.001	TAL1.H12CORE.2.P.B_TAL1.H12CORE.2.P.B	Kif5b	1.387	1.484	-0.097
chr18-5427369-5429046	3.201	0.001	TAL1.H12CORE.2.P.B_TAL1.H12CORE.2.P.B	Kif5b	1.387	1.484	-0.097
chr18-5427369-5429046	3.201	0.001	TAL1.H12CORE.2.P.B_TAL1.H12CORE.2.P.B	Kif5b	1.387	1.484	-0.097
chr18-5427369-5429046	3.201	0.001	TAL1.H12CORE.1.P.B_TAL1.H12CORE.1.P.B	Kif5b	1.387	1.484	-0.097
chr18-5427369-5429046	3.201	0.001	TAL1.H12CORE.1.P.B_TAL1.H12CORE.1.P.B	Kif5b	1.387	1.484	-0.097
chr18-5427369-5429046	3.201	0.001	TAL1.H12CORE.1.P.B_TAL1.H12CORE.1.P.B	Kif5b	1.387	1.484	-0.097
chr18-5427369-5429046	3.201	0.001	TAL1.H12CORE.2.P.B_TAL1.H12CORE.2.P.B	Kif5b	1.387	1.484	-0.097
chr18-5427369-5429046	3.201	0.001	TAL1.H12CORE.2.P.B_TAL1.H12CORE.2.P.B	Kif5b	1.387	1.484	-0.097
chr18-5427369-5429046	3.201	0.001	TAL1.H12CORE.2.P.B_TAL1.H12CORE.2.P.B	Kif5b	1.387	1.484	-0.097
chr18-5427369-5429046	3.201	0.001	TAL1.H12CORE.2.P.B_TAL1.H12CORE.2.P.B	Kif5b	1.387	1.484	-0.097
chr6-29434903-29437082	-3.624	0	TAL1.H12CORE.0.P.B_TAL1.H12CORE.0.P.B	Ahcyl2	0.181	0.279	-0.097
chr6-29434903-29437082	-3.624	0	TAL1.H12CORE.2.P.B_TAL1.H12CORE.2.P.B	Ahcyl2	0.181	0.279	-0.097
chr6-29434903-29437082	-3.624	0	TAL1.H12CORE.2.P.B_TAL1.H12CORE.2.P.B	Ahcyl2	0.181	0.279	-0.097
chr6-29434903-29437082	-3.624	0	TAL1.H12CORE.0.P.B_TAL1.H12CORE.0.P.B	Ahcyl2	0.181	0.279	-0.097
chr6-29434903-29437082	-3.624	0	TAL1.H12CORE.2.P.B_TAL1.H12CORE.2.P.B	Ahcyl2	0.181	0.279	-0.097
chr6-29434903-29437082	-3.624	0	TAL1.H12CORE.2.P.B_TAL1.H12CORE.2.P.B	Ahcyl2	0.181	0.279	-0.097
chr1-64735606-64738120	-2.602	0.005	TAL1.H12CORE.1.P.B_TAL1.H12CORE.1.P.B	Adam23	0.062	0.159	-0.097
chr1-64735606-64738120	-2.602	0.005	TAL1.H12CORE.1.P.B_TAL1.H12CORE.1.P.B	Adam23	0.062	0.159	-0.097
chr1-64735606-64738120	-2.602	0.005	TAL1.H12CORE.2.P.B_TAL1.H12CORE.2.P.B	Adam23	0.062	0.159	-0.097
chr1-64735606-64738120	-2.602	0.005	TAL1.H12CORE.1.P.B_TAL1.H12CORE.1.P.B	Adam23	0.062	0.159	-0.097
chr1-64735606-64738120	-2.602	0.005	TAL1.H12CORE.1.P.B_TAL1.H12CORE.1.P.B	Adam23	0.062	0.159	-0.097
chr1-64735606-64738120	-2.602	0.005	TAL1.H12CORE.2.P.B_TAL1.H12CORE.2.P.B	Adam23	0.062	0.159	-0.097
chr15-89547477-89549300	-2.536	0.006	TAL1.H12CORE.1.P.B_TAL1.H12CORE.1.P.B	Dennd6b	0.174	0.271	-0.097
chr15-89547477-89549300	-2.536	0.006	TAL1.H12CORE.1.P.B_TAL1.H12CORE.1.P.B	Dennd6b	0.174	0.271	-0.097
chr10-57783241-57785128	-3.3	0	TAL1.H12CORE.2.P.B_TAL1.H12CORE.2.P.B	Serinc1	1.562	1.659	-0.096
chr10-57783241-57785128	-3.3	0	TAL1.H12CORE.2.P.B_TAL1.H12CORE.2.P.B	Serinc1	1.562	1.659	-0.096
chr2-26090657-26092549	3.332	0	TAL1.H12CORE.1.P.B_TAL1.H12CORE.1.P.B	Anapc2	0.377	0.473	-0.096
chr2-26090657-26092549	3.332	0	TAL1.H12CORE.1.P.B_TAL1.H12CORE.1.P.B	Anapc2	0.377	0.473	-0.096
chr2-26297617-26299588	-2.374	0.009	TAL1.H12CORE.2.P.B_TAL1.H12CORE.2.P.B	Anapc2	0.377	0.473	-0.096
chr2-26297617-26299588	-2.374	0.009	TAL1.H12CORE.2.P.B_TAL1.H12CORE.2.P.B	Anapc2	0.377	0.473	-0.096
chr2-29835172-29836111	-2.729	0.003	TAL1.H12CORE.2.P.B_TAL1.H12CORE.2.P.B	Tbc1d13	0.133	0.229	-0.096
chr2-29835172-29836111	-2.729	0.003	TAL1.H12CORE.2.P.B_TAL1.H12CORE.2.P.B	Tbc1d13	0.133	0.229	-0.096
chr9-64020128-64023238	-3.06	0.001	TAL1.H12CORE.2.P.B_TAL1.H12CORE.2.P.B	Rab11a	0.907	1.003	-0.096
chr9-64020128-64023238	-3.06	0.001	TAL1.H12CORE.2.P.B_TAL1.H12CORE.2.P.B	Rab11a	0.907	1.003	-0.096
chr9-64020128-64023238	-3.06	0.001	TAL1.H12CORE.2.P.B_TAL1.H12CORE.2.P.B	Rab11a	0.907	1.003	-0.096
chr9-64020128-64023238	-3.06	0.001	TAL1.H12CORE.2.P.B_TAL1.H12CORE.2.P.B	Rab11a	0.907	1.003	-0.096
chr9-65152588-65154084	-3.015	0.001	TAL1.H12CORE.2.P.B_TAL1.H12CORE.2.P.B	Rab11a	0.907	1.003	-0.096
chr9-65152588-65154084	-3.015	0.001	TAL1.H12CORE.2.P.B_TAL1.H12CORE.2.P.B	Rab11a	0.907	1.003	-0.096
chr9-65178111-65179329	-4.644	0	TAL1.H12CORE.1.P.B_TAL1.H12CORE.1.P.B	Rab11a	0.907	1.003	-0.096
chr9-65178111-65179329	-4.644	0	TAL1.H12CORE.1.P.B_TAL1.H12CORE.1.P.B	Rab11a	0.907	1.003	-0.096
chr9-65178111-65179329	-4.644	0	TAL1.H12CORE.2.P.B_TAL1.H12CORE.2.P.B	Rab11a	0.907	1.003	-0.096
chr9-65178111-65179329	-4.644	0	TAL1.H12CORE.2.P.B_TAL1.H12CORE.2.P.B	Rab11a	0.907	1.003	-0.096
chr9-65178111-65179329	-4.644	0	TAL1.H12CORE.1.P.B_TAL1.H12CORE.1.P.B	Rab11a	0.907	1.003	-0.096
chr9-65178111-65179329	-4.644	0	TAL1.H12CORE.1.P.B_TAL1.H12CORE.1.P.B	Rab11a	0.907	1.003	-0.096
chr9-65178111-65179329	-4.644	0	TAL1.H12CORE.2.P.B_TAL1.H12CORE.2.P.B	Rab11a	0.907	1.003	-0.096
chr9-65178111-65179329	-4.644	0	TAL1.H12CORE.2.P.B_TAL1.H12CORE.2.P.B	Rab11a	0.907	1.003	-0.096
chr6-83136413-83138365	-2.724	0.003	TAL1.H12CORE.2.P.B_TAL1.H12CORE.2.P.B	Lrrtm4	0.099	0.194	-0.096
chr6-83136413-83138365	-2.724	0.003	TAL1.H12CORE.2.P.B_TAL1.H12CORE.2.P.B	Lrrtm4	0.099	0.194	-0.096
chr15-81802035-81803269	-2.776	0.003	TAL1.H12CORE.1.P.B_TAL1.H12CORE.1.P.B	Aco2	0.984	1.079	-0.096
chr15-81802035-81803269	-2.776	0.003	TAL1.H12CORE.1.P.B_TAL1.H12CORE.1.P.B	Aco2	0.984	1.079	-0.096
chr15-81802035-81803269	-2.776	0.003	TAL1.H12CORE.1.P.B_TAL1.H12CORE.1.P.B	Aco2	0.984	1.079	-0.096
chr15-81802035-81803269	-2.776	0.003	TAL1.H12CORE.2.P.B_TAL1.H12CORE.2.P.B	Aco2	0.984	1.079	-0.096
chr15-81802035-81803269	-2.776	0.003	TAL1.H12CORE.1.P.B_TAL1.H12CORE.1.P.B	Aco2	0.984	1.079	-0.096
chr15-81802035-81803269	-2.776	0.003	TAL1.H12CORE.1.P.B_TAL1.H12CORE.1.P.B	Aco2	0.984	1.079	-0.096
chr15-81802035-81803269	-2.776	0.003	TAL1.H12CORE.1.P.B_TAL1.H12CORE.1.P.B	Aco2	0.984	1.079	-0.096
chr15-81802035-81803269	-2.776	0.003	TAL1.H12CORE.2.P.B_TAL1.H12CORE.2.P.B	Aco2	0.984	1.079	-0.096
chr15-84417005-84418430	-2.577	0.005	TAL1.H12CORE.1.P.B_TAL1.H12CORE.1.P.B	Atxn10	1.924	2.019	-0.095
chr15-84417005-84418430	-2.577	0.005	TAL1.H12CORE.1.P.B_TAL1.H12CORE.1.P.B	Atxn10	1.924	2.019	-0.095
chr15-85613046-85614287	-2.646	0.004	TAL1.H12CORE.1.P.B_TAL1.H12CORE.1.P.B	Atxn10	1.924	2.019	-0.095
chr15-85613046-85614287	-2.646	0.004	TAL1.H12CORE.1.P.B_TAL1.H12CORE.1.P.B	Atxn10	1.924	2.019	-0.095
chr15-85652611-85654383	-2.967	0.002	TAL1.H12CORE.1.P.B_TAL1.H12CORE.1.P.B	Atxn10	1.924	2.019	-0.095
chr15-85652611-85654383	-2.967	0.002	TAL1.H12CORE.1.P.B_TAL1.H12CORE.1.P.B	Atxn10	1.924	2.019	-0.095
chr10-126956471-126958161	2.357	0.009	TAL1.H12CORE.2.P.B_TAL1.H12CORE.2.P.B	Nabp2	1.179	1.275	-0.095
chr10-126956471-126958161	2.357	0.009	TAL1.H12CORE.2.P.B_TAL1.H12CORE.2.P.B	Nabp2	1.179	1.275	-0.095
chr10-127077610-127080151	-2.344	0.01	TAL1.H12CORE.1.P.B_TAL1.H12CORE.1.P.B	Nabp2	1.179	1.275	-0.095
chr10-127077610-127080151	-2.344	0.01	TAL1.H12CORE.1.P.B_TAL1.H12CORE.1.P.B	Nabp2	1.179	1.275	-0.095
chr5-33721237-33723915	-2.958	0.002	TAL1.H12CORE.1.P.B_TAL1.H12CORE.1.P.B	Ctbp1	1.665	1.76	-0.095
chr5-33721237-33723915	-2.958	0.002	TAL1.H12CORE.1.P.B_TAL1.H12CORE.1.P.B	Ctbp1	1.665	1.76	-0.095
chr14-54430422-54433714	-2.341	0.01	TAL1.H12CORE.0.P.B_TAL1.H12CORE.0.P.B	Jph4	0.224	0.318	-0.095
chr14-54430422-54433714	-2.341	0.01	TAL1.H12CORE.1.P.B_TAL1.H12CORE.1.P.B	Jph4	0.224	0.318	-0.095
chr14-54430422-54433714	-2.341	0.01	TAL1.H12CORE.0.P.B_TAL1.H12CORE.0.P.B	Jph4	0.224	0.318	-0.095
chr14-54430422-54433714	-2.341	0.01	TAL1.H12CORE.1.P.B_TAL1.H12CORE.1.P.B	Jph4	0.224	0.318	-0.095
chr14-54924534-54927204	-2.469	0.007	TAL1.H12CORE.1.P.B_TAL1.H12CORE.1.P.B	Jph4	0.224	0.318	-0.095
chr14-54924534-54927204	-2.469	0.007	TAL1.H12CORE.2.P.B_TAL1.H12CORE.2.P.B	Jph4	0.224	0.318	-0.095
chr14-54924534-54927204	-2.469	0.007	TAL1.H12CORE.2.P.B_TAL1.H12CORE.2.P.B	Jph4	0.224	0.318	-0.095
chr14-54924534-54927204	-2.469	0.007	TAL1.H12CORE.2.P.B_TAL1.H12CORE.2.P.B	Jph4	0.224	0.318	-0.095
chr14-54924534-54927204	-2.469	0.007	TAL1.H12CORE.1.P.B_TAL1.H12CORE.1.P.B	Jph4	0.224	0.318	-0.095
chr14-54924534-54927204	-2.469	0.007	TAL1.H12CORE.2.P.B_TAL1.H12CORE.2.P.B	Jph4	0.224	0.318	-0.095
chr14-54924534-54927204	-2.469	0.007	TAL1.H12CORE.2.P.B_TAL1.H12CORE.2.P.B	Jph4	0.224	0.318	-0.095
chr14-54924534-54927204	-2.469	0.007	TAL1.H12CORE.2.P.B_TAL1.H12CORE.2.P.B	Jph4	0.224	0.318	-0.095
chr14-55027294-55029653	2.574	0.005	TAL1.H12CORE.1.P.B_TAL1.H12CORE.1.P.B	Jph4	0.224	0.318	-0.095
chr14-55027294-55029653	2.574	0.005	TAL1.H12CORE.1.P.B_TAL1.H12CORE.1.P.B	Jph4	0.224	0.318	-0.095
chr14-55027294-55029653	2.574	0.005	TAL1.H12CORE.1.P.B_TAL1.H12CORE.1.P.B	Jph4	0.224	0.318	-0.095
chr14-55027294-55029653	2.574	0.005	TAL1.H12CORE.1.P.B_TAL1.H12CORE.1.P.B	Jph4	0.224	0.318	-0.095
chr7-126949034-126951149	3.797	0	TAL1.H12CORE.2.P.B_TAL1.H12CORE.2.P.B	Sbk1	1.531	1.625	-0.094
chr7-126949034-126951149	3.797	0	TAL1.H12CORE.2.P.B_TAL1.H12CORE.2.P.B	Sbk1	1.531	1.625	-0.094
chr16-18394960-18396458	-2.421	0.008	TAL1.H12CORE.1.P.B_TAL1.H12CORE.1.P.B	Med15	0.23	0.324	-0.094
chr16-18394960-18396458	-2.421	0.008	TAL1.H12CORE.1.P.B_TAL1.H12CORE.1.P.B	Med15	0.23	0.324	-0.094
chr16-18399965-18401400	-2.393	0.008	TAL1.H12CORE.1.P.B_TAL1.H12CORE.1.P.B	Med15	0.23	0.324	-0.094
chr16-18399965-18401400	-2.393	0.008	TAL1.H12CORE.2.P.B_TAL1.H12CORE.2.P.B	Med15	0.23	0.324	-0.094
chr16-18399965-18401400	-2.393	0.008	TAL1.H12CORE.1.P.B_TAL1.H12CORE.1.P.B	Med15	0.23	0.324	-0.094
chr16-18399965-18401400	-2.393	0.008	TAL1.H12CORE.2.P.B_TAL1.H12CORE.2.P.B	Med15	0.23	0.324	-0.094
chr2-30721694-30723425	2.67	0.004	TAL1.H12CORE.0.P.B_TAL1.H12CORE.0.P.B	Swi5	1.99	2.084	-0.094
chr2-30721694-30723425	2.67	0.004	TAL1.H12CORE.0.P.B_TAL1.H12CORE.0.P.B	Swi5	1.99	2.084	-0.094
chr14-25225894-25227336	4.256	0	TAL1.H12CORE.1.P.B_TAL1.H12CORE.1.P.B	Zmiz1	1.291	1.384	-0.094
chr14-25225894-25227336	4.256	0	TAL1.H12CORE.2.P.B_TAL1.H12CORE.2.P.B	Zmiz1	1.291	1.384	-0.094
chr14-25225894-25227336	4.256	0	TAL1.H12CORE.1.P.B_TAL1.H12CORE.1.P.B	Zmiz1	1.291	1.384	-0.094
chr14-25225894-25227336	4.256	0	TAL1.H12CORE.2.P.B_TAL1.H12CORE.2.P.B	Zmiz1	1.291	1.384	-0.094
chr14-25420687-25422409	3.41	0	TAL1.H12CORE.2.P.B_TAL1.H12CORE.2.P.B	Zmiz1	1.291	1.384	-0.094
chr14-25420687-25422409	3.41	0	TAL1.H12CORE.2.P.B_TAL1.H12CORE.2.P.B	Zmiz1	1.291	1.384	-0.094
chr6-144208860-144211102	3.214	0.001	TAL1.H12CORE.0.P.B_TAL1.H12CORE.0.P.B	Sox5	0.162	0.255	-0.093
chr6-144208860-144211102	3.214	0.001	TAL1.H12CORE.1.P.B_TAL1.H12CORE.1.P.B	Sox5	0.162	0.255	-0.093
chr6-144208860-144211102	3.214	0.001	TAL1.H12CORE.1.P.B_TAL1.H12CORE.1.P.B	Sox5	0.162	0.255	-0.093
chr6-144208860-144211102	3.214	0.001	TAL1.H12CORE.1.P.B_TAL1.H12CORE.1.P.B	Sox5	0.162	0.255	-0.093
chr6-144208860-144211102	3.214	0.001	TAL1.H12CORE.2.P.B_TAL1.H12CORE.2.P.B	Sox5	0.162	0.255	-0.093
chr6-144208860-144211102	3.214	0.001	TAL1.H12CORE.0.P.B_TAL1.H12CORE.0.P.B	Sox5	0.162	0.255	-0.093
chr6-144208860-144211102	3.214	0.001	TAL1.H12CORE.1.P.B_TAL1.H12CORE.1.P.B	Sox5	0.162	0.255	-0.093
chr6-144208860-144211102	3.214	0.001	TAL1.H12CORE.1.P.B_TAL1.H12CORE.1.P.B	Sox5	0.162	0.255	-0.093
chr6-144208860-144211102	3.214	0.001	TAL1.H12CORE.1.P.B_TAL1.H12CORE.1.P.B	Sox5	0.162	0.255	-0.093
chr6-144208860-144211102	3.214	0.001	TAL1.H12CORE.2.P.B_TAL1.H12CORE.2.P.B	Sox5	0.162	0.255	-0.093
chr3-88204485-88207889	-2.828	0.002	TAL1.H12CORE.1.P.B_TAL1.H12CORE.1.P.B	Naxe	0.409	0.502	-0.093
chr3-88204485-88207889	-2.828	0.002	TAL1.H12CORE.1.P.B_TAL1.H12CORE.1.P.B	Naxe	0.409	0.502	-0.093
chr3-88204485-88207889	-2.828	0.002	TAL1.H12CORE.1.P.B_TAL1.H12CORE.1.P.B	Naxe	0.409	0.502	-0.093
chr3-88204485-88207889	-2.828	0.002	TAL1.H12CORE.2.P.B_TAL1.H12CORE.2.P.B	Naxe	0.409	0.502	-0.093
chr3-88204485-88207889	-2.828	0.002	TAL1.H12CORE.2.P.B_TAL1.H12CORE.2.P.B	Naxe	0.409	0.502	-0.093
chr3-88204485-88207889	-2.828	0.002	TAL1.H12CORE.1.P.B_TAL1.H12CORE.1.P.B	Naxe	0.409	0.502	-0.093
chr3-88204485-88207889	-2.828	0.002	TAL1.H12CORE.1.P.B_TAL1.H12CORE.1.P.B	Naxe	0.409	0.502	-0.093
chr3-88204485-88207889	-2.828	0.002	TAL1.H12CORE.1.P.B_TAL1.H12CORE.1.P.B	Naxe	0.409	0.502	-0.093
chr3-88204485-88207889	-2.828	0.002	TAL1.H12CORE.2.P.B_TAL1.H12CORE.2.P.B	Naxe	0.409	0.502	-0.093
chr3-88204485-88207889	-2.828	0.002	TAL1.H12CORE.2.P.B_TAL1.H12CORE.2.P.B	Naxe	0.409	0.502	-0.093
chr3-88221075-88222789	-3.76	0	TAL1.H12CORE.2.P.B_TAL1.H12CORE.2.P.B	Naxe	0.409	0.502	-0.093
chr3-88221075-88222789	-3.76	0	TAL1.H12CORE.2.P.B_TAL1.H12CORE.2.P.B	Naxe	0.409	0.502	-0.093
chr3-88225724-88226418	-2.409	0.008	TAL1.H12CORE.2.P.B_TAL1.H12CORE.2.P.B	Naxe	0.409	0.502	-0.093
chr3-88225724-88226418	-2.409	0.008	TAL1.H12CORE.2.P.B_TAL1.H12CORE.2.P.B	Naxe	0.409	0.502	-0.093
chr3-88230367-88232758	-4.024	0	TAL1.H12CORE.1.P.B_TAL1.H12CORE.1.P.B	Naxe	0.409	0.502	-0.093
chr3-88230367-88232758	-4.024	0	TAL1.H12CORE.1.P.B_TAL1.H12CORE.1.P.B	Naxe	0.409	0.502	-0.093
chr3-88230367-88232758	-4.024	0	TAL1.H12CORE.2.P.B_TAL1.H12CORE.2.P.B	Naxe	0.409	0.502	-0.093
chr3-88230367-88232758	-4.024	0	TAL1.H12CORE.1.P.B_TAL1.H12CORE.1.P.B	Naxe	0.409	0.502	-0.093
chr3-88230367-88232758	-4.024	0	TAL1.H12CORE.1.P.B_TAL1.H12CORE.1.P.B	Naxe	0.409	0.502	-0.093
chr3-88230367-88232758	-4.024	0	TAL1.H12CORE.2.P.B_TAL1.H12CORE.2.P.B	Naxe	0.409	0.502	-0.093
chr2-30721694-30723425	2.565	0.005	TAL1.H12CORE.0.P.B_TAL1.H12CORE.0.P.B	Crat	0.079	0.172	-0.093
chr2-30721694-30723425	2.565	0.005	TAL1.H12CORE.0.P.B_TAL1.H12CORE.0.P.B	Crat	0.079	0.172	-0.093
chr7-139544610-139545851	-2.723	0.003	TAL1.H12CORE.2.P.B_TAL1.H12CORE.2.P.B	Zfp511	0.446	0.538	-0.093
chr7-139544610-139545851	-2.723	0.003	TAL1.H12CORE.2.P.B_TAL1.H12CORE.2.P.B	Zfp511	0.446	0.538	-0.093
chr5-111518985-111520272	-2.842	0.002	TAL1.H12CORE.0.P.B_TAL1.H12CORE.0.P.B	Ttc28	0.298	0.39	-0.092
chr5-111518985-111520272	-2.842	0.002	TAL1.H12CORE.0.P.B_TAL1.H12CORE.0.P.B	Ttc28	0.298	0.39	-0.092
chr8-84729810-84732148	-2.366	0.009	TAL1.H12CORE.0.P.B_TAL1.H12CORE.0.P.B	Itfg1	0.364	0.455	-0.092
chr8-84729810-84732148	-2.366	0.009	TAL1.H12CORE.0.P.B_TAL1.H12CORE.0.P.B	Itfg1	0.364	0.455	-0.092
chr8-84729810-84732148	-2.366	0.009	TAL1.H12CORE.0.P.B_TAL1.H12CORE.0.P.B	Itfg1	0.364	0.455	-0.092
chr8-84729810-84732148	-2.366	0.009	TAL1.H12CORE.0.P.B_TAL1.H12CORE.0.P.B	Itfg1	0.364	0.455	-0.092
chr8-84814016-84815876	-3.74	0	TAL1.H12CORE.1.P.B_TAL1.H12CORE.1.P.B	Itfg1	0.364	0.455	-0.092
chr8-84814016-84815876	-3.74	0	TAL1.H12CORE.1.P.B_TAL1.H12CORE.1.P.B	Itfg1	0.364	0.455	-0.092
chr8-84814016-84815876	-3.74	0	TAL1.H12CORE.2.P.B_TAL1.H12CORE.2.P.B	Itfg1	0.364	0.455	-0.092
chr8-84814016-84815876	-3.74	0	TAL1.H12CORE.2.P.B_TAL1.H12CORE.2.P.B	Itfg1	0.364	0.455	-0.092
chr8-84814016-84815876	-3.74	0	TAL1.H12CORE.1.P.B_TAL1.H12CORE.1.P.B	Itfg1	0.364	0.455	-0.092
chr8-84814016-84815876	-3.74	0	TAL1.H12CORE.1.P.B_TAL1.H12CORE.1.P.B	Itfg1	0.364	0.455	-0.092
chr8-84814016-84815876	-3.74	0	TAL1.H12CORE.2.P.B_TAL1.H12CORE.2.P.B	Itfg1	0.364	0.455	-0.092
chr8-84814016-84815876	-3.74	0	TAL1.H12CORE.2.P.B_TAL1.H12CORE.2.P.B	Itfg1	0.364	0.455	-0.092
chr11-69364428-69365368	-2.919	0.002	TAL1.H12CORE.1.P.B_TAL1.H12CORE.1.P.B	Ndel1	0.355	0.446	-0.092
chr11-69364428-69365368	-2.919	0.002	TAL1.H12CORE.2.P.B_TAL1.H12CORE.2.P.B	Ndel1	0.355	0.446	-0.092
chr11-69364428-69365368	-2.919	0.002	TAL1.H12CORE.1.P.B_TAL1.H12CORE.1.P.B	Ndel1	0.355	0.446	-0.092
chr11-69364428-69365368	-2.919	0.002	TAL1.H12CORE.2.P.B_TAL1.H12CORE.2.P.B	Ndel1	0.355	0.446	-0.092
chr10-80259789-80261976	-2.65	0.004	TAL1.H12CORE.2.P.B_TAL1.H12CORE.2.P.B	Apc2	0.814	0.905	-0.092
chr10-80259789-80261976	-2.65	0.004	TAL1.H12CORE.2.P.B_TAL1.H12CORE.2.P.B	Apc2	0.814	0.905	-0.092
chr10-81481410-81482905	2.493	0.006	TAL1.H12CORE.2.P.B_TAL1.H12CORE.2.P.B	Apc2	0.814	0.905	-0.092
chr10-81481410-81482905	2.493	0.006	TAL1.H12CORE.2.P.B_TAL1.H12CORE.2.P.B	Apc2	0.814	0.905	-0.092
chr8-70656073-70657064	-4.759	0	TAL1.H12CORE.1.P.B_TAL1.H12CORE.1.P.B	Mrpl34	2.015	2.106	-0.091
chr8-70656073-70657064	-4.759	0	TAL1.H12CORE.1.P.B_TAL1.H12CORE.1.P.B	Mrpl34	2.015	2.106	-0.091
chr3-88204485-88207889	3.343	0	TAL1.H12CORE.1.P.B_TAL1.H12CORE.1.P.B	Mrpl24	1.006	1.097	-0.091
chr3-88204485-88207889	3.343	0	TAL1.H12CORE.1.P.B_TAL1.H12CORE.1.P.B	Mrpl24	1.006	1.097	-0.091
chr3-88204485-88207889	3.343	0	TAL1.H12CORE.1.P.B_TAL1.H12CORE.1.P.B	Mrpl24	1.006	1.097	-0.091
chr3-88204485-88207889	3.343	0	TAL1.H12CORE.2.P.B_TAL1.H12CORE.2.P.B	Mrpl24	1.006	1.097	-0.091
chr3-88204485-88207889	3.343	0	TAL1.H12CORE.2.P.B_TAL1.H12CORE.2.P.B	Mrpl24	1.006	1.097	-0.091
chr3-88204485-88207889	3.343	0	TAL1.H12CORE.1.P.B_TAL1.H12CORE.1.P.B	Mrpl24	1.006	1.097	-0.091
chr3-88204485-88207889	3.343	0	TAL1.H12CORE.1.P.B_TAL1.H12CORE.1.P.B	Mrpl24	1.006	1.097	-0.091
chr3-88204485-88207889	3.343	0	TAL1.H12CORE.1.P.B_TAL1.H12CORE.1.P.B	Mrpl24	1.006	1.097	-0.091
chr3-88204485-88207889	3.343	0	TAL1.H12CORE.2.P.B_TAL1.H12CORE.2.P.B	Mrpl24	1.006	1.097	-0.091
chr3-88204485-88207889	3.343	0	TAL1.H12CORE.2.P.B_TAL1.H12CORE.2.P.B	Mrpl24	1.006	1.097	-0.091
chr3-88221075-88222789	3.491	0	TAL1.H12CORE.2.P.B_TAL1.H12CORE.2.P.B	Mrpl24	1.006	1.097	-0.091
chr3-88221075-88222789	3.491	0	TAL1.H12CORE.2.P.B_TAL1.H12CORE.2.P.B	Mrpl24	1.006	1.097	-0.091
chr3-88230367-88232758	2.683	0.004	TAL1.H12CORE.1.P.B_TAL1.H12CORE.1.P.B	Mrpl24	1.006	1.097	-0.091
chr3-88230367-88232758	2.683	0.004	TAL1.H12CORE.1.P.B_TAL1.H12CORE.1.P.B	Mrpl24	1.006	1.097	-0.091
chr3-88230367-88232758	2.683	0.004	TAL1.H12CORE.2.P.B_TAL1.H12CORE.2.P.B	Mrpl24	1.006	1.097	-0.091
chr3-88230367-88232758	2.683	0.004	TAL1.H12CORE.1.P.B_TAL1.H12CORE.1.P.B	Mrpl24	1.006	1.097	-0.091
chr3-88230367-88232758	2.683	0.004	TAL1.H12CORE.1.P.B_TAL1.H12CORE.1.P.B	Mrpl24	1.006	1.097	-0.091
chr3-88230367-88232758	2.683	0.004	TAL1.H12CORE.2.P.B_TAL1.H12CORE.2.P.B	Mrpl24	1.006	1.097	-0.091
chr11-116332209-116332940	-3.854	0	TAL1.H12CORE.1.P.B_TAL1.H12CORE.1.P.B	Exoc7	0.384	0.474	-0.091
chr11-116332209-116332940	-3.854	0	TAL1.H12CORE.1.P.B_TAL1.H12CORE.1.P.B	Exoc7	0.384	0.474	-0.091
chr3-102010883-102013279	2.406	0.008	TAL1.H12CORE.1.P.B_TAL1.H12CORE.1.P.B	Vangl1	0.003	0.093	-0.09
chr3-102010883-102013279	2.406	0.008	TAL1.H12CORE.2.P.B_TAL1.H12CORE.2.P.B	Vangl1	0.003	0.093	-0.09
chr3-102010883-102013279	2.406	0.008	TAL1.H12CORE.2.P.B_TAL1.H12CORE.2.P.B	Vangl1	0.003	0.093	-0.09
chr3-102010883-102013279	2.406	0.008	TAL1.H12CORE.1.P.B_TAL1.H12CORE.1.P.B	Vangl1	0.003	0.093	-0.09
chr3-102010883-102013279	2.406	0.008	TAL1.H12CORE.2.P.B_TAL1.H12CORE.2.P.B	Vangl1	0.003	0.093	-0.09
chr3-102010883-102013279	2.406	0.008	TAL1.H12CORE.2.P.B_TAL1.H12CORE.2.P.B	Vangl1	0.003	0.093	-0.09
chr14-64586802-64588425	-2.332	0.01	TAL1.H12CORE.1.P.B_TAL1.H12CORE.1.P.B	Ccdc25	0.57	0.66	-0.09
chr14-64586802-64588425	-2.332	0.01	TAL1.H12CORE.1.P.B_TAL1.H12CORE.1.P.B	Ccdc25	0.57	0.66	-0.09
chr8-70656073-70657064	-3.274	0.001	TAL1.H12CORE.1.P.B_TAL1.H12CORE.1.P.B	Fkbp8	1.104	1.194	-0.09
chr8-70656073-70657064	-3.274	0.001	TAL1.H12CORE.1.P.B_TAL1.H12CORE.1.P.B	Fkbp8	1.104	1.194	-0.09
chr2-153482924-153484530	2.367	0.009	TAL1.H12CORE.1.P.B_TAL1.H12CORE.1.P.B	Cbfa2t2	0.389	0.478	-0.089
chr2-153482924-153484530	2.367	0.009	TAL1.H12CORE.2.P.B_TAL1.H12CORE.2.P.B	Cbfa2t2	0.389	0.478	-0.089
chr2-153482924-153484530	2.367	0.009	TAL1.H12CORE.2.P.B_TAL1.H12CORE.2.P.B	Cbfa2t2	0.389	0.478	-0.089
chr2-153482924-153484530	2.367	0.009	TAL1.H12CORE.1.P.B_TAL1.H12CORE.1.P.B	Cbfa2t2	0.389	0.478	-0.089
chr2-153482924-153484530	2.367	0.009	TAL1.H12CORE.2.P.B_TAL1.H12CORE.2.P.B	Cbfa2t2	0.389	0.478	-0.089
chr2-153482924-153484530	2.367	0.009	TAL1.H12CORE.2.P.B_TAL1.H12CORE.2.P.B	Cbfa2t2	0.389	0.478	-0.089
chr2-31636217-31637206	-2.833	0.002	TAL1.H12CORE.1.P.B_TAL1.H12CORE.1.P.B	6330409D20Rik	0.012	0.101	-0.089
chr2-31636217-31637206	-2.833	0.002	TAL1.H12CORE.1.P.B_TAL1.H12CORE.1.P.B	6330409D20Rik	0.012	0.101	-0.089
chr2-32322474-32323716	3.095	0.001	TAL1.H12CORE.2.P.B_TAL1.H12CORE.2.P.B	6330409D20Rik	0.012	0.101	-0.089
chr2-32322474-32323716	3.095	0.001	TAL1.H12CORE.2.P.B_TAL1.H12CORE.2.P.B	6330409D20Rik	0.012	0.101	-0.089
chr2-32740700-32742637	2.561	0.005	TAL1.H12CORE.1.P.B_TAL1.H12CORE.1.P.B	6330409D20Rik	0.012	0.101	-0.089
chr2-32740700-32742637	2.561	0.005	TAL1.H12CORE.1.P.B_TAL1.H12CORE.1.P.B	6330409D20Rik	0.012	0.101	-0.089
chr2-152375198-152376911	4.06	0	TAL1.H12CORE.2.P.B_TAL1.H12CORE.2.P.B	Sox12	0.798	0.887	-0.089
chr2-152375198-152376911	4.06	0	TAL1.H12CORE.2.P.B_TAL1.H12CORE.2.P.B	Sox12	0.798	0.887	-0.089
chr12-111693349-111695473	-3.869	0	TAL1.H12CORE.2.P.B_TAL1.H12CORE.2.P.B	Apopt1	0.523	0.611	-0.089
chr12-111693349-111695473	-3.869	0	TAL1.H12CORE.2.P.B_TAL1.H12CORE.2.P.B	Apopt1	0.523	0.611	-0.089
chr12-111809601-111810131	-2.927	0.002	TAL1.H12CORE.2.P.B_TAL1.H12CORE.2.P.B	Apopt1	0.523	0.611	-0.089
chr12-111809601-111810131	-2.927	0.002	TAL1.H12CORE.2.P.B_TAL1.H12CORE.2.P.B	Apopt1	0.523	0.611	-0.089
chr4-124484553-124486586	2.423	0.008	TAL1.H12CORE.1.P.B_TAL1.H12CORE.1.P.B	Pabpc4	0.204	0.292	-0.089
chr4-124484553-124486586	2.423	0.008	TAL1.H12CORE.2.P.B_TAL1.H12CORE.2.P.B	Pabpc4	0.204	0.292	-0.089
chr4-124484553-124486586	2.423	0.008	TAL1.H12CORE.2.P.B_TAL1.H12CORE.2.P.B	Pabpc4	0.204	0.292	-0.089
chr4-124484553-124486586	2.423	0.008	TAL1.H12CORE.2.P.B_TAL1.H12CORE.2.P.B	Pabpc4	0.204	0.292	-0.089
chr4-124484553-124486586	2.423	0.008	TAL1.H12CORE.1.P.B_TAL1.H12CORE.1.P.B	Pabpc4	0.204	0.292	-0.089
chr4-124484553-124486586	2.423	0.008	TAL1.H12CORE.2.P.B_TAL1.H12CORE.2.P.B	Pabpc4	0.204	0.292	-0.089
chr4-124484553-124486586	2.423	0.008	TAL1.H12CORE.2.P.B_TAL1.H12CORE.2.P.B	Pabpc4	0.204	0.292	-0.089
chr4-124484553-124486586	2.423	0.008	TAL1.H12CORE.2.P.B_TAL1.H12CORE.2.P.B	Pabpc4	0.204	0.292	-0.089
chr17-25560905-25562086	-3.929	0	TAL1.H12CORE.0.P.B_TAL1.H12CORE.0.P.B	Syngr3	0.094	0.183	-0.089
chr17-25560905-25562086	-3.929	0	TAL1.H12CORE.0.P.B_TAL1.H12CORE.0.P.B	Syngr3	0.094	0.183	-0.089
chr5-104108438-104110857	2.427	0.008	TAL1.H12CORE.1.P.B_TAL1.H12CORE.1.P.B	BC005561	0.88	0.968	-0.088
chr5-104108438-104110857	2.427	0.008	TAL1.H12CORE.1.P.B_TAL1.H12CORE.1.P.B	BC005561	0.88	0.968	-0.088
chr2-32740700-32742637	2.594	0.005	TAL1.H12CORE.1.P.B_TAL1.H12CORE.1.P.B	Slc2a8	0.144	0.232	-0.088
chr2-32740700-32742637	2.594	0.005	TAL1.H12CORE.1.P.B_TAL1.H12CORE.1.P.B	Slc2a8	0.144	0.232	-0.088
chr14-64586802-64588425	3.279	0.001	TAL1.H12CORE.1.P.B_TAL1.H12CORE.1.P.B	Pnoc	0.323	0.411	-0.088
chr14-64586802-64588425	3.279	0.001	TAL1.H12CORE.1.P.B_TAL1.H12CORE.1.P.B	Pnoc	0.323	0.411	-0.088
chr14-65403260-65405057	2.583	0.005	TAL1.H12CORE.0.P.B_TAL1.H12CORE.0.P.B	Pnoc	0.323	0.411	-0.088
chr14-65403260-65405057	2.583	0.005	TAL1.H12CORE.0.P.B_TAL1.H12CORE.0.P.B	Pnoc	0.323	0.411	-0.088
chr12-111693349-111695473	4.199	0	TAL1.H12CORE.2.P.B_TAL1.H12CORE.2.P.B	Siva1	0.291	0.379	-0.088
chr12-111693349-111695473	4.199	0	TAL1.H12CORE.2.P.B_TAL1.H12CORE.2.P.B	Siva1	0.291	0.379	-0.088
chr12-112663199-112664804	3.328	0	TAL1.H12CORE.1.P.B_TAL1.H12CORE.1.P.B	Siva1	0.291	0.379	-0.088
chr12-112663199-112664804	3.328	0	TAL1.H12CORE.2.P.B_TAL1.H12CORE.2.P.B	Siva1	0.291	0.379	-0.088
chr12-112663199-112664804	3.328	0	TAL1.H12CORE.1.P.B_TAL1.H12CORE.1.P.B	Siva1	0.291	0.379	-0.088
chr12-112663199-112664804	3.328	0	TAL1.H12CORE.2.P.B_TAL1.H12CORE.2.P.B	Siva1	0.291	0.379	-0.088
chr7-126949034-126951149	-3.567	0	TAL1.H12CORE.2.P.B_TAL1.H12CORE.2.P.B	Ppp4c	0.685	0.772	-0.087
chr7-126949034-126951149	-3.567	0	TAL1.H12CORE.2.P.B_TAL1.H12CORE.2.P.B	Ppp4c	0.685	0.772	-0.087
chr4-81726592-81728486	-5.173	0	TAL1.H12CORE.1.P.B_TAL1.H12CORE.1.P.B	Lurap1l	0.159	0.247	-0.087
chr4-81726592-81728486	-5.173	0	TAL1.H12CORE.2.P.B_TAL1.H12CORE.2.P.B	Lurap1l	0.159	0.247	-0.087
chr4-81726592-81728486	-5.173	0	TAL1.H12CORE.2.P.B_TAL1.H12CORE.2.P.B	Lurap1l	0.159	0.247	-0.087
chr4-81726592-81728486	-5.173	0	TAL1.H12CORE.2.P.B_TAL1.H12CORE.2.P.B	Lurap1l	0.159	0.247	-0.087
chr4-81726592-81728486	-5.173	0	TAL1.H12CORE.1.P.B_TAL1.H12CORE.1.P.B	Lurap1l	0.159	0.247	-0.087
chr4-81726592-81728486	-5.173	0	TAL1.H12CORE.2.P.B_TAL1.H12CORE.2.P.B	Lurap1l	0.159	0.247	-0.087
chr4-81726592-81728486	-5.173	0	TAL1.H12CORE.2.P.B_TAL1.H12CORE.2.P.B	Lurap1l	0.159	0.247	-0.087
chr4-81726592-81728486	-5.173	0	TAL1.H12CORE.2.P.B_TAL1.H12CORE.2.P.B	Lurap1l	0.159	0.247	-0.087
chr4-82504205-82507346	-4.683	0	TAL1.H12CORE.1.P.B_TAL1.H12CORE.1.P.B	Lurap1l	0.159	0.247	-0.087
chr4-82504205-82507346	-4.683	0	TAL1.H12CORE.1.P.B_TAL1.H12CORE.1.P.B	Lurap1l	0.159	0.247	-0.087
chr4-82703630-82706255	-4.641	0	TAL1.H12CORE.0.P.B_TAL1.H12CORE.0.P.B	Lurap1l	0.159	0.247	-0.087
chr4-82703630-82706255	-4.641	0	TAL1.H12CORE.1.P.B_TAL1.H12CORE.1.P.B	Lurap1l	0.159	0.247	-0.087
chr4-82703630-82706255	-4.641	0	TAL1.H12CORE.2.P.B_TAL1.H12CORE.2.P.B	Lurap1l	0.159	0.247	-0.087
chr4-82703630-82706255	-4.641	0	TAL1.H12CORE.0.P.B_TAL1.H12CORE.0.P.B	Lurap1l	0.159	0.247	-0.087
chr4-82703630-82706255	-4.641	0	TAL1.H12CORE.1.P.B_TAL1.H12CORE.1.P.B	Lurap1l	0.159	0.247	-0.087
chr4-82703630-82706255	-4.641	0	TAL1.H12CORE.2.P.B_TAL1.H12CORE.2.P.B	Lurap1l	0.159	0.247	-0.087
chr10-80259789-80261976	-2.625	0.004	TAL1.H12CORE.2.P.B_TAL1.H12CORE.2.P.B	Cbarp	0.283	0.369	-0.087
chr10-80259789-80261976	-2.625	0.004	TAL1.H12CORE.2.P.B_TAL1.H12CORE.2.P.B	Cbarp	0.283	0.369	-0.087
chr16-18399965-18401400	3.112	0.001	TAL1.H12CORE.1.P.B_TAL1.H12CORE.1.P.B	Fgd4	0.553	0.639	-0.086
chr16-18399965-18401400	3.112	0.001	TAL1.H12CORE.2.P.B_TAL1.H12CORE.2.P.B	Fgd4	0.553	0.639	-0.086
chr16-18399965-18401400	3.112	0.001	TAL1.H12CORE.1.P.B_TAL1.H12CORE.1.P.B	Fgd4	0.553	0.639	-0.086
chr16-18399965-18401400	3.112	0.001	TAL1.H12CORE.2.P.B_TAL1.H12CORE.2.P.B	Fgd4	0.553	0.639	-0.086
chr11-69364428-69365368	-2.456	0.007	TAL1.H12CORE.1.P.B_TAL1.H12CORE.1.P.B	Borcs6	0.379	0.466	-0.086
chr11-69364428-69365368	-2.456	0.007	TAL1.H12CORE.2.P.B_TAL1.H12CORE.2.P.B	Borcs6	0.379	0.466	-0.086
chr10-38553193-38554445	3.315	0	TAL1.H12CORE.2.P.B_TAL1.H12CORE.2.P.B	Marcks	3.562	3.649	-0.086
chr10-38553193-38554445	3.315	0	TAL1.H12CORE.2.P.B_TAL1.H12CORE.2.P.B	Marcks	3.562	3.649	-0.086
chr19-5740703-5742696	-3.367	0	TAL1.H12CORE.2.P.B_TAL1.H12CORE.2.P.B	Ehd1	0.592	0.678	-0.086
chr19-5740703-5742696	-3.367	0	TAL1.H12CORE.2.P.B_TAL1.H12CORE.2.P.B	Ehd1	0.592	0.678	-0.086
chr4-124484553-124486586	-2.627	0.004	TAL1.H12CORE.1.P.B_TAL1.H12CORE.1.P.B	Meaf6	0.844	0.93	-0.086
chr4-124484553-124486586	-2.627	0.004	TAL1.H12CORE.2.P.B_TAL1.H12CORE.2.P.B	Meaf6	0.844	0.93	-0.086
chr4-124484553-124486586	-2.627	0.004	TAL1.H12CORE.2.P.B_TAL1.H12CORE.2.P.B	Meaf6	0.844	0.93	-0.086
chr4-124484553-124486586	-2.627	0.004	TAL1.H12CORE.2.P.B_TAL1.H12CORE.2.P.B	Meaf6	0.844	0.93	-0.086
chr4-124484553-124486586	-2.627	0.004	TAL1.H12CORE.1.P.B_TAL1.H12CORE.1.P.B	Meaf6	0.844	0.93	-0.086
chr4-124484553-124486586	-2.627	0.004	TAL1.H12CORE.2.P.B_TAL1.H12CORE.2.P.B	Meaf6	0.844	0.93	-0.086
chr4-124484553-124486586	-2.627	0.004	TAL1.H12CORE.2.P.B_TAL1.H12CORE.2.P.B	Meaf6	0.844	0.93	-0.086
chr4-124484553-124486586	-2.627	0.004	TAL1.H12CORE.2.P.B_TAL1.H12CORE.2.P.B	Meaf6	0.844	0.93	-0.086
chr4-126465616-126466272	-3.266	0.001	TAL1.H12CORE.1.P.B_TAL1.H12CORE.1.P.B	Meaf6	0.844	0.93	-0.086
chr4-126465616-126466272	-3.266	0.001	TAL1.H12CORE.1.P.B_TAL1.H12CORE.1.P.B	Meaf6	0.844	0.93	-0.086
chr4-127226853-127227811	-2.591	0.005	TAL1.H12CORE.2.P.B_TAL1.H12CORE.2.P.B	Meaf6	0.844	0.93	-0.086
chr4-127226853-127227811	-2.591	0.005	TAL1.H12CORE.2.P.B_TAL1.H12CORE.2.P.B	Meaf6	0.844	0.93	-0.086
chr1-132322105-132323401	-3.322	0	TAL1.H12CORE.1.P.B_TAL1.H12CORE.1.P.B	Cntn2	0.101	0.187	-0.086
chr1-132322105-132323401	-3.322	0	TAL1.H12CORE.2.P.B_TAL1.H12CORE.2.P.B	Cntn2	0.101	0.187	-0.086
chr1-132322105-132323401	-3.322	0	TAL1.H12CORE.1.P.B_TAL1.H12CORE.1.P.B	Cntn2	0.101	0.187	-0.086
chr1-132322105-132323401	-3.322	0	TAL1.H12CORE.2.P.B_TAL1.H12CORE.2.P.B	Cntn2	0.101	0.187	-0.086
chr1-133079340-133080909	-2.863	0.002	TAL1.H12CORE.0.P.B_TAL1.H12CORE.0.P.B	Cntn2	0.101	0.187	-0.086
chr1-133079340-133080909	-2.863	0.002	TAL1.H12CORE.1.P.B_TAL1.H12CORE.1.P.B	Cntn2	0.101	0.187	-0.086
chr1-133079340-133080909	-2.863	0.002	TAL1.H12CORE.2.P.B_TAL1.H12CORE.2.P.B	Cntn2	0.101	0.187	-0.086
chr1-133079340-133080909	-2.863	0.002	TAL1.H12CORE.0.P.B_TAL1.H12CORE.0.P.B	Cntn2	0.101	0.187	-0.086
chr1-133079340-133080909	-2.863	0.002	TAL1.H12CORE.1.P.B_TAL1.H12CORE.1.P.B	Cntn2	0.101	0.187	-0.086
chr1-133079340-133080909	-2.863	0.002	TAL1.H12CORE.2.P.B_TAL1.H12CORE.2.P.B	Cntn2	0.101	0.187	-0.086
chr17-78198918-78201913	2.747	0.003	TAL1.H12CORE.2.P.B_TAL1.H12CORE.2.P.B	Crim1	0.029	0.115	-0.086
chr17-78198918-78201913	2.747	0.003	TAL1.H12CORE.2.P.B_TAL1.H12CORE.2.P.B	Crim1	0.029	0.115	-0.086
chr14-54430422-54433714	-2.938	0.002	TAL1.H12CORE.0.P.B_TAL1.H12CORE.0.P.B	Myh7	0.242	0.327	-0.086
chr14-54430422-54433714	-2.938	0.002	TAL1.H12CORE.1.P.B_TAL1.H12CORE.1.P.B	Myh7	0.242	0.327	-0.086
chr14-54430422-54433714	-2.938	0.002	TAL1.H12CORE.0.P.B_TAL1.H12CORE.0.P.B	Myh7	0.242	0.327	-0.086
chr14-54430422-54433714	-2.938	0.002	TAL1.H12CORE.1.P.B_TAL1.H12CORE.1.P.B	Myh7	0.242	0.327	-0.086
chr14-55027294-55029653	3.457	0	TAL1.H12CORE.1.P.B_TAL1.H12CORE.1.P.B	Myh7	0.242	0.327	-0.086
chr14-55027294-55029653	3.457	0	TAL1.H12CORE.1.P.B_TAL1.H12CORE.1.P.B	Myh7	0.242	0.327	-0.086
chr14-55027294-55029653	3.457	0	TAL1.H12CORE.1.P.B_TAL1.H12CORE.1.P.B	Myh7	0.242	0.327	-0.086
chr14-55027294-55029653	3.457	0	TAL1.H12CORE.1.P.B_TAL1.H12CORE.1.P.B	Myh7	0.242	0.327	-0.086
chr11-4946655-4948533	3.719	0	TAL1.H12CORE.2.P.B_TAL1.H12CORE.2.P.B	Mtmr3	0.244	0.33	-0.086
chr11-4946655-4948533	3.719	0	TAL1.H12CORE.2.P.B_TAL1.H12CORE.2.P.B	Mtmr3	0.244	0.33	-0.086
chr14-54430422-54433714	3.123	0.001	TAL1.H12CORE.0.P.B_TAL1.H12CORE.0.P.B	Prmt5	0.362	0.447	-0.085
chr14-54430422-54433714	3.123	0.001	TAL1.H12CORE.1.P.B_TAL1.H12CORE.1.P.B	Prmt5	0.362	0.447	-0.085
chr14-54430422-54433714	3.123	0.001	TAL1.H12CORE.0.P.B_TAL1.H12CORE.0.P.B	Prmt5	0.362	0.447	-0.085
chr14-54430422-54433714	3.123	0.001	TAL1.H12CORE.1.P.B_TAL1.H12CORE.1.P.B	Prmt5	0.362	0.447	-0.085
chr14-55027294-55029653	-3.786	0	TAL1.H12CORE.1.P.B_TAL1.H12CORE.1.P.B	Prmt5	0.362	0.447	-0.085
chr14-55027294-55029653	-3.786	0	TAL1.H12CORE.1.P.B_TAL1.H12CORE.1.P.B	Prmt5	0.362	0.447	-0.085
chr14-55027294-55029653	-3.786	0	TAL1.H12CORE.1.P.B_TAL1.H12CORE.1.P.B	Prmt5	0.362	0.447	-0.085
chr14-55027294-55029653	-3.786	0	TAL1.H12CORE.1.P.B_TAL1.H12CORE.1.P.B	Prmt5	0.362	0.447	-0.085
chr4-129510728-129511673	-2.454	0.007	TAL1.H12CORE.1.P.B_TAL1.H12CORE.1.P.B	Zbtb8a	0.169	0.255	-0.085
chr4-129510728-129511673	-2.454	0.007	TAL1.H12CORE.2.P.B_TAL1.H12CORE.2.P.B	Zbtb8a	0.169	0.255	-0.085
chr4-129510728-129511673	-2.454	0.007	TAL1.H12CORE.1.P.B_TAL1.H12CORE.1.P.B	Zbtb8a	0.169	0.255	-0.085
chr4-129510728-129511673	-2.454	0.007	TAL1.H12CORE.2.P.B_TAL1.H12CORE.2.P.B	Zbtb8a	0.169	0.255	-0.085
chr2-166549427-166550477	6.141	0	TAL1.H12CORE.2.P.B_TAL1.H12CORE.2.P.B	Sulf2	0.218	0.303	-0.085
chr2-166549427-166550477	6.141	0	TAL1.H12CORE.2.P.B_TAL1.H12CORE.2.P.B	Sulf2	0.218	0.303	-0.085
chr6-124463470-124465237	2.682	0.004	TAL1.H12CORE.1.P.B_TAL1.H12CORE.1.P.B	Clstn3	0.119	0.204	-0.085
chr6-124463470-124465237	2.682	0.004	TAL1.H12CORE.2.P.B_TAL1.H12CORE.2.P.B	Clstn3	0.119	0.204	-0.085
chr6-124463470-124465237	2.682	0.004	TAL1.H12CORE.1.P.B_TAL1.H12CORE.1.P.B	Clstn3	0.119	0.204	-0.085
chr6-124463470-124465237	2.682	0.004	TAL1.H12CORE.2.P.B_TAL1.H12CORE.2.P.B	Clstn3	0.119	0.204	-0.085
chr6-136470120-136471240	-2.579	0.005	TAL1.H12CORE.2.P.B_TAL1.H12CORE.2.P.B	Grin2b	0.044	0.129	-0.085
chr6-136470120-136471240	-2.579	0.005	TAL1.H12CORE.2.P.B_TAL1.H12CORE.2.P.B	Grin2b	0.044	0.129	-0.085
chr11-98981364-98983019	2.427	0.008	TAL1.H12CORE.2.P.B_TAL1.H12CORE.2.P.B	Krt10	0.672	0.757	-0.085
chr11-98981364-98983019	2.427	0.008	TAL1.H12CORE.2.P.B_TAL1.H12CORE.2.P.B	Krt10	0.672	0.757	-0.085
chr5-115730799-115733122	3.105	0.001	TAL1.H12CORE.1.P.B_TAL1.H12CORE.1.P.B	Bicdl1	0.091	0.176	-0.085
chr5-115730799-115733122	3.105	0.001	TAL1.H12CORE.1.P.B_TAL1.H12CORE.1.P.B	Bicdl1	0.091	0.176	-0.085
chr7-126949034-126951149	3.748	0	TAL1.H12CORE.2.P.B_TAL1.H12CORE.2.P.B	Kctd13	0.441	0.525	-0.084
chr7-126949034-126951149	3.748	0	TAL1.H12CORE.2.P.B_TAL1.H12CORE.2.P.B	Kctd13	0.441	0.525	-0.084
chr4-154948172-154949078	2.804	0.003	TAL1.H12CORE.2.P.B_TAL1.H12CORE.2.P.B	Dffb	0.157	0.239	-0.083
chr4-154948172-154949078	2.804	0.003	TAL1.H12CORE.2.P.B_TAL1.H12CORE.2.P.B	Dffb	0.157	0.239	-0.083
chr11-102227380-102228571	-3.922	0	TAL1.H12CORE.1.P.B_TAL1.H12CORE.1.P.B	Fam171a2	0.793	0.876	-0.083
chr11-102227380-102228571	-3.922	0	TAL1.H12CORE.1.P.B_TAL1.H12CORE.1.P.B	Fam171a2	0.793	0.876	-0.083
chr11-102227380-102228571	-3.922	0	TAL1.H12CORE.2.P.B_TAL1.H12CORE.2.P.B	Fam171a2	0.793	0.876	-0.083
chr11-102227380-102228571	-3.922	0	TAL1.H12CORE.1.P.B_TAL1.H12CORE.1.P.B	Fam171a2	0.793	0.876	-0.083
chr11-102227380-102228571	-3.922	0	TAL1.H12CORE.1.P.B_TAL1.H12CORE.1.P.B	Fam171a2	0.793	0.876	-0.083
chr11-102227380-102228571	-3.922	0	TAL1.H12CORE.2.P.B_TAL1.H12CORE.2.P.B	Fam171a2	0.793	0.876	-0.083
chr11-102602926-102606283	-2.468	0.007	TAL1.H12CORE.1.P.B_TAL1.H12CORE.1.P.B	Fam171a2	0.793	0.876	-0.083
chr11-102602926-102606283	-2.468	0.007	TAL1.H12CORE.1.P.B_TAL1.H12CORE.1.P.B	Fam171a2	0.793	0.876	-0.083
chr11-102602926-102606283	-2.468	0.007	TAL1.H12CORE.2.P.B_TAL1.H12CORE.2.P.B	Fam171a2	0.793	0.876	-0.083
chr11-102602926-102606283	-2.468	0.007	TAL1.H12CORE.2.P.B_TAL1.H12CORE.2.P.B	Fam171a2	0.793	0.876	-0.083
chr11-102602926-102606283	-2.468	0.007	TAL1.H12CORE.2.P.B_TAL1.H12CORE.2.P.B	Fam171a2	0.793	0.876	-0.083
chr11-102602926-102606283	-2.468	0.007	TAL1.H12CORE.1.P.B_TAL1.H12CORE.1.P.B	Fam171a2	0.793	0.876	-0.083
chr11-102602926-102606283	-2.468	0.007	TAL1.H12CORE.1.P.B_TAL1.H12CORE.1.P.B	Fam171a2	0.793	0.876	-0.083
chr11-102602926-102606283	-2.468	0.007	TAL1.H12CORE.2.P.B_TAL1.H12CORE.2.P.B	Fam171a2	0.793	0.876	-0.083
chr11-102602926-102606283	-2.468	0.007	TAL1.H12CORE.2.P.B_TAL1.H12CORE.2.P.B	Fam171a2	0.793	0.876	-0.083
chr11-102602926-102606283	-2.468	0.007	TAL1.H12CORE.2.P.B_TAL1.H12CORE.2.P.B	Fam171a2	0.793	0.876	-0.083
chr11-6604899-6606490	-3.719	0	TAL1.H12CORE.2.P.B_TAL1.H12CORE.2.P.B	Pold2	0.083	0.165	-0.082
chr11-6604899-6606490	-3.719	0	TAL1.H12CORE.2.P.B_TAL1.H12CORE.2.P.B	Pold2	0.083	0.165	-0.082
chr14-64586802-64588425	2.74	0.003	TAL1.H12CORE.1.P.B_TAL1.H12CORE.1.P.B	Msra	0.208	0.29	-0.082
chr14-64586802-64588425	2.74	0.003	TAL1.H12CORE.1.P.B_TAL1.H12CORE.1.P.B	Msra	0.208	0.29	-0.082
chr11-120261084-120262893	-3	0.001	TAL1.H12CORE.2.P.B_TAL1.H12CORE.2.P.B	Sirt7	0.411	0.492	-0.082
chr11-120261084-120262893	-3	0.001	TAL1.H12CORE.2.P.B_TAL1.H12CORE.2.P.B	Sirt7	0.411	0.492	-0.082
chr4-107828394-107829238	-5.02	0	TAL1.H12CORE.2.P.B_TAL1.H12CORE.2.P.B	Tmem59	1.919	2	-0.081
chr4-107828394-107829238	-5.02	0	TAL1.H12CORE.2.P.B_TAL1.H12CORE.2.P.B	Tmem59	1.919	2	-0.081
chr6-29434903-29437082	3.308	0	TAL1.H12CORE.0.P.B_TAL1.H12CORE.0.P.B	Tnpo3	0.473	0.554	-0.081
chr6-29434903-29437082	3.308	0	TAL1.H12CORE.2.P.B_TAL1.H12CORE.2.P.B	Tnpo3	0.473	0.554	-0.081
chr6-29434903-29437082	3.308	0	TAL1.H12CORE.2.P.B_TAL1.H12CORE.2.P.B	Tnpo3	0.473	0.554	-0.081
chr6-29434903-29437082	3.308	0	TAL1.H12CORE.0.P.B_TAL1.H12CORE.0.P.B	Tnpo3	0.473	0.554	-0.081
chr6-29434903-29437082	3.308	0	TAL1.H12CORE.2.P.B_TAL1.H12CORE.2.P.B	Tnpo3	0.473	0.554	-0.081
chr6-29434903-29437082	3.308	0	TAL1.H12CORE.2.P.B_TAL1.H12CORE.2.P.B	Tnpo3	0.473	0.554	-0.081
chr11-94412663-94414352	-3.327	0	TAL1.H12CORE.1.P.B_TAL1.H12CORE.1.P.B	Slc35b1	0.77	0.852	-0.081
chr11-94412663-94414352	-3.327	0	TAL1.H12CORE.2.P.B_TAL1.H12CORE.2.P.B	Slc35b1	0.77	0.852	-0.081
chr11-94412663-94414352	-3.327	0	TAL1.H12CORE.1.P.B_TAL1.H12CORE.1.P.B	Slc35b1	0.77	0.852	-0.081
chr11-94412663-94414352	-3.327	0	TAL1.H12CORE.2.P.B_TAL1.H12CORE.2.P.B	Slc35b1	0.77	0.852	-0.081
chr11-94428059-94429632	-2.729	0.003	TAL1.H12CORE.2.P.B_TAL1.H12CORE.2.P.B	Slc35b1	0.77	0.852	-0.081
chr11-94428059-94429632	-2.729	0.003	TAL1.H12CORE.2.P.B_TAL1.H12CORE.2.P.B	Slc35b1	0.77	0.852	-0.081
chr19-41745589-41746907	4.783	0	TAL1.H12CORE.2.P.B_TAL1.H12CORE.2.P.B	Aldh18a1	0.206	0.287	-0.081
chr19-41745589-41746907	4.783	0	TAL1.H12CORE.2.P.B_TAL1.H12CORE.2.P.B	Aldh18a1	0.206	0.287	-0.081
chr1-119902117-119903554	3.527	0	TAL1.H12CORE.1.P.B_TAL1.H12CORE.1.P.B	2610027F03Rik	0.213	0.294	-0.081
chr1-119902117-119903554	3.527	0	TAL1.H12CORE.1.P.B_TAL1.H12CORE.1.P.B	2610027F03Rik	0.213	0.294	-0.081
chr1-119902117-119903554	3.527	0	TAL1.H12CORE.2.P.B_TAL1.H12CORE.2.P.B	2610027F03Rik	0.213	0.294	-0.081
chr1-119902117-119903554	3.527	0	TAL1.H12CORE.1.P.B_TAL1.H12CORE.1.P.B	2610027F03Rik	0.213	0.294	-0.081
chr1-119902117-119903554	3.527	0	TAL1.H12CORE.1.P.B_TAL1.H12CORE.1.P.B	2610027F03Rik	0.213	0.294	-0.081
chr1-119902117-119903554	3.527	0	TAL1.H12CORE.2.P.B_TAL1.H12CORE.2.P.B	2610027F03Rik	0.213	0.294	-0.081
chr1-120643024-120645014	4.94	0	TAL1.H12CORE.1.P.B_TAL1.H12CORE.1.P.B	2610027F03Rik	0.213	0.294	-0.081
chr1-120643024-120645014	4.94	0	TAL1.H12CORE.2.P.B_TAL1.H12CORE.2.P.B	2610027F03Rik	0.213	0.294	-0.081
chr1-120643024-120645014	4.94	0	TAL1.H12CORE.1.P.B_TAL1.H12CORE.1.P.B	2610027F03Rik	0.213	0.294	-0.081
chr1-120643024-120645014	4.94	0	TAL1.H12CORE.2.P.B_TAL1.H12CORE.2.P.B	2610027F03Rik	0.213	0.294	-0.081
chr17-35702336-35705123	-2.501	0.006	TAL1.H12CORE.1.P.B_TAL1.H12CORE.1.P.B	Atat1	1.076	1.157	-0.081
chr17-35702336-35705123	-2.501	0.006	TAL1.H12CORE.2.P.B_TAL1.H12CORE.2.P.B	Atat1	1.076	1.157	-0.081
chr17-35702336-35705123	-2.501	0.006	TAL1.H12CORE.1.P.B_TAL1.H12CORE.1.P.B	Atat1	1.076	1.157	-0.081
chr17-35702336-35705123	-2.501	0.006	TAL1.H12CORE.2.P.B_TAL1.H12CORE.2.P.B	Atat1	1.076	1.157	-0.081
chr6-72215678-72217640	-3.536	0	TAL1.H12CORE.1.P.B_TAL1.H12CORE.1.P.B	St3gal5	0.301	0.382	-0.081
chr6-72215678-72217640	-3.536	0	TAL1.H12CORE.1.P.B_TAL1.H12CORE.1.P.B	St3gal5	0.301	0.382	-0.081
chr6-72215678-72217640	-3.536	0	TAL1.H12CORE.2.P.B_TAL1.H12CORE.2.P.B	St3gal5	0.301	0.382	-0.081
chr6-72215678-72217640	-3.536	0	TAL1.H12CORE.2.P.B_TAL1.H12CORE.2.P.B	St3gal5	0.301	0.382	-0.081
chr6-72215678-72217640	-3.536	0	TAL1.H12CORE.2.P.B_TAL1.H12CORE.2.P.B	St3gal5	0.301	0.382	-0.081
chr6-72215678-72217640	-3.536	0	TAL1.H12CORE.1.P.B_TAL1.H12CORE.1.P.B	St3gal5	0.301	0.382	-0.081
chr6-72215678-72217640	-3.536	0	TAL1.H12CORE.1.P.B_TAL1.H12CORE.1.P.B	St3gal5	0.301	0.382	-0.081
chr6-72215678-72217640	-3.536	0	TAL1.H12CORE.2.P.B_TAL1.H12CORE.2.P.B	St3gal5	0.301	0.382	-0.081
chr6-72215678-72217640	-3.536	0	TAL1.H12CORE.2.P.B_TAL1.H12CORE.2.P.B	St3gal5	0.301	0.382	-0.081
chr6-72215678-72217640	-3.536	0	TAL1.H12CORE.2.P.B_TAL1.H12CORE.2.P.B	St3gal5	0.301	0.382	-0.081
chr11-101477142-101478295	3.406	0	TAL1.H12CORE.1.P.B_TAL1.H12CORE.1.P.B	Lsm12	0.85	0.93	-0.081
chr11-101477142-101478295	3.406	0	TAL1.H12CORE.2.P.B_TAL1.H12CORE.2.P.B	Lsm12	0.85	0.93	-0.081
chr11-101477142-101478295	3.406	0	TAL1.H12CORE.1.P.B_TAL1.H12CORE.1.P.B	Lsm12	0.85	0.93	-0.081
chr11-101477142-101478295	3.406	0	TAL1.H12CORE.2.P.B_TAL1.H12CORE.2.P.B	Lsm12	0.85	0.93	-0.081
chr11-101478980-101479952	2.503	0.006	TAL1.H12CORE.2.P.B_TAL1.H12CORE.2.P.B	Lsm12	0.85	0.93	-0.081
chr11-101478980-101479952	2.503	0.006	TAL1.H12CORE.2.P.B_TAL1.H12CORE.2.P.B	Lsm12	0.85	0.93	-0.081
chr11-102227380-102228571	2.966	0.002	TAL1.H12CORE.1.P.B_TAL1.H12CORE.1.P.B	Lsm12	0.85	0.93	-0.081
chr11-102227380-102228571	2.966	0.002	TAL1.H12CORE.1.P.B_TAL1.H12CORE.1.P.B	Lsm12	0.85	0.93	-0.081
chr11-102227380-102228571	2.966	0.002	TAL1.H12CORE.2.P.B_TAL1.H12CORE.2.P.B	Lsm12	0.85	0.93	-0.081
chr11-102227380-102228571	2.966	0.002	TAL1.H12CORE.1.P.B_TAL1.H12CORE.1.P.B	Lsm12	0.85	0.93	-0.081
chr11-102227380-102228571	2.966	0.002	TAL1.H12CORE.1.P.B_TAL1.H12CORE.1.P.B	Lsm12	0.85	0.93	-0.081
chr11-102227380-102228571	2.966	0.002	TAL1.H12CORE.2.P.B_TAL1.H12CORE.2.P.B	Lsm12	0.85	0.93	-0.081
chr2-152653783-152654895	3.117	0.001	TAL1.H12CORE.2.P.B_TAL1.H12CORE.2.P.B	Nol4l	0.212	0.292	-0.08
chr2-152653783-152654895	3.117	0.001	TAL1.H12CORE.2.P.B_TAL1.H12CORE.2.P.B	Nol4l	0.212	0.292	-0.08
chr2-153482924-153484530	-2.486	0.006	TAL1.H12CORE.1.P.B_TAL1.H12CORE.1.P.B	Nol4l	0.212	0.292	-0.08
chr2-153482924-153484530	-2.486	0.006	TAL1.H12CORE.2.P.B_TAL1.H12CORE.2.P.B	Nol4l	0.212	0.292	-0.08
chr2-153482924-153484530	-2.486	0.006	TAL1.H12CORE.2.P.B_TAL1.H12CORE.2.P.B	Nol4l	0.212	0.292	-0.08
chr2-153482924-153484530	-2.486	0.006	TAL1.H12CORE.1.P.B_TAL1.H12CORE.1.P.B	Nol4l	0.212	0.292	-0.08
chr2-153482924-153484530	-2.486	0.006	TAL1.H12CORE.2.P.B_TAL1.H12CORE.2.P.B	Nol4l	0.212	0.292	-0.08
chr2-153482924-153484530	-2.486	0.006	TAL1.H12CORE.2.P.B_TAL1.H12CORE.2.P.B	Nol4l	0.212	0.292	-0.08
chr2-153491995-153493417	2.727	0.003	TAL1.H12CORE.2.P.B_TAL1.H12CORE.2.P.B	Nol4l	0.212	0.292	-0.08
chr2-153491995-153493417	2.727	0.003	TAL1.H12CORE.2.P.B_TAL1.H12CORE.2.P.B	Nol4l	0.212	0.292	-0.08
chr9-27306830-27308004	2.472	0.007	TAL1.H12CORE.1.P.B_TAL1.H12CORE.1.P.B	B3gat1	0.216	0.296	-0.08
chr9-27306830-27308004	2.472	0.007	TAL1.H12CORE.1.P.B_TAL1.H12CORE.1.P.B	B3gat1	0.216	0.296	-0.08
[truncated: 18,691 more rows]

## Sheet: Gata2 targets
feature	zscore	links_pvalue	TFBS_name	gene_name	GA1_2_exp_avg_log2	GL1_2_exp_avg_log2	avg_log2FC
chr12-112163716-112164983	2.382	0.009	GATA2.H12CORE.0.PSM.A_GATA2.H12CORE.0.PSM.A	Kif26a	0.076	0.689	-0.613
chr12-112163716-112164983	2.382	0.009	GATA2.H12CORE.0.PSM.A_GATA2.H12CORE.0.PSM.A	Kif26a	0.076	0.689	-0.613
chr12-112163716-112164983	2.382	0.009	GATA2.H12CORE.1.P.B_GATA2.H12CORE.1.P.B	Kif26a	0.076	0.689	-0.613
chr12-112163716-112164983	2.382	0.009	GATA2.H12CORE.0.PSM.A_GATA2.H12CORE.0.PSM.A	Kif26a	0.076	0.689	-0.613
chr12-112163716-112164983	2.382	0.009	GATA2.H12CORE.0.PSM.A_GATA2.H12CORE.0.PSM.A	Kif26a	0.076	0.689	-0.613
chr12-112163716-112164983	2.382	0.009	GATA2.H12CORE.1.P.B_GATA2.H12CORE.1.P.B	Kif26a	0.076	0.689	-0.613
chr2-122365914-122367297	2.397	0.008	GATA2.H12CORE.1.P.B_GATA2.H12CORE.1.P.B	Shf	0.69	1.23	-0.54
chr2-122365914-122367297	2.397	0.008	GATA2.H12CORE.1.P.B_GATA2.H12CORE.1.P.B	Shf	0.69	1.23	-0.54
chr14-54430422-54433714	-2.966	0.002	GATA2.H12CORE.0.PSM.A_GATA2.H12CORE.0.PSM.A	Rem2	0.449	0.835	-0.386
chr14-54430422-54433714	-2.966	0.002	GATA2.H12CORE.1.P.B_GATA2.H12CORE.1.P.B	Rem2	0.449	0.835	-0.386
chr14-54430422-54433714	-2.966	0.002	GATA2.H12CORE.0.PSM.A_GATA2.H12CORE.0.PSM.A	Rem2	0.449	0.835	-0.386
chr14-54430422-54433714	-2.966	0.002	GATA2.H12CORE.1.P.B_GATA2.H12CORE.1.P.B	Rem2	0.449	0.835	-0.386
chr13-51848591-51849848	4.605	0	GATA2.H12CORE.0.PSM.A_GATA2.H12CORE.0.PSM.A	Gadd45g	1.65	2.034	-0.384
chr13-51848591-51849848	4.605	0	GATA2.H12CORE.0.PSM.A_GATA2.H12CORE.0.PSM.A	Gadd45g	1.65	2.034	-0.384
chr13-51917632-51919699	4.395	0	GATA2.H12CORE.1.P.B_GATA2.H12CORE.1.P.B	Gadd45g	1.65	2.034	-0.384
chr13-51917632-51919699	4.395	0	GATA2.H12CORE.1.P.B_GATA2.H12CORE.1.P.B	Gadd45g	1.65	2.034	-0.384
chr8-84729810-84732148	-2.597	0.005	GATA2.H12CORE.0.PSM.A_GATA2.H12CORE.0.PSM.A	Tecr	1.842	2.196	-0.354
chr8-84729810-84732148	-2.597	0.005	GATA2.H12CORE.1.P.B_GATA2.H12CORE.1.P.B	Tecr	1.842	2.196	-0.354
chr8-84729810-84732148	-2.597	0.005	GATA2.H12CORE.1.P.B_GATA2.H12CORE.1.P.B	Tecr	1.842	2.196	-0.354
chr8-84729810-84732148	-2.597	0.005	GATA2.H12CORE.0.PSM.A_GATA2.H12CORE.0.PSM.A	Tecr	1.842	2.196	-0.354
chr8-84729810-84732148	-2.597	0.005	GATA2.H12CORE.1.P.B_GATA2.H12CORE.1.P.B	Tecr	1.842	2.196	-0.354
chr8-84729810-84732148	-2.597	0.005	GATA2.H12CORE.1.P.B_GATA2.H12CORE.1.P.B	Tecr	1.842	2.196	-0.354
chr9-107369329-107370687	2.488	0.006	GATA2.H12CORE.0.PSM.A_GATA2.H12CORE.0.PSM.A	Cacna2d2	0.279	0.554	-0.275
chr9-107369329-107370687	2.488	0.006	GATA2.H12CORE.1.P.B_GATA2.H12CORE.1.P.B	Cacna2d2	0.279	0.554	-0.275
chr9-107369329-107370687	2.488	0.006	GATA2.H12CORE.0.PSM.A_GATA2.H12CORE.0.PSM.A	Cacna2d2	0.279	0.554	-0.275
chr9-107369329-107370687	2.488	0.006	GATA2.H12CORE.1.P.B_GATA2.H12CORE.1.P.B	Cacna2d2	0.279	0.554	-0.275
chr9-107722761-107724418	2.648	0.004	GATA2.H12CORE.0.PSM.A_GATA2.H12CORE.0.PSM.A	Cacna2d2	0.279	0.554	-0.275
chr9-107722761-107724418	2.648	0.004	GATA2.H12CORE.1.P.B_GATA2.H12CORE.1.P.B	Cacna2d2	0.279	0.554	-0.275
chr9-107722761-107724418	2.648	0.004	GATA2.H12CORE.1.P.B_GATA2.H12CORE.1.P.B	Cacna2d2	0.279	0.554	-0.275
chr9-107722761-107724418	2.648	0.004	GATA2.H12CORE.0.PSM.A_GATA2.H12CORE.0.PSM.A	Cacna2d2	0.279	0.554	-0.275
chr9-107722761-107724418	2.648	0.004	GATA2.H12CORE.1.P.B_GATA2.H12CORE.1.P.B	Cacna2d2	0.279	0.554	-0.275
chr9-107722761-107724418	2.648	0.004	GATA2.H12CORE.1.P.B_GATA2.H12CORE.1.P.B	Cacna2d2	0.279	0.554	-0.275
chr8-122719602-122721611	2.977	0.001	GATA2.H12CORE.0.PSM.A_GATA2.H12CORE.0.PSM.A	Trappc2l	1.27	1.542	-0.272
chr8-122719602-122721611	2.977	0.001	GATA2.H12CORE.1.P.B_GATA2.H12CORE.1.P.B	Trappc2l	1.27	1.542	-0.272
chr8-122719602-122721611	2.977	0.001	GATA2.H12CORE.1.P.B_GATA2.H12CORE.1.P.B	Trappc2l	1.27	1.542	-0.272
chr8-122719602-122721611	2.977	0.001	GATA2.H12CORE.0.PSM.A_GATA2.H12CORE.0.PSM.A	Trappc2l	1.27	1.542	-0.272
chr8-122719602-122721611	2.977	0.001	GATA2.H12CORE.1.P.B_GATA2.H12CORE.1.P.B	Trappc2l	1.27	1.542	-0.272
chr8-122719602-122721611	2.977	0.001	GATA2.H12CORE.1.P.B_GATA2.H12CORE.1.P.B	Trappc2l	1.27	1.542	-0.272
chr2-33615521-33617065	4.745	0	GATA2.H12CORE.1.P.B_GATA2.H12CORE.1.P.B	Sh2d3c	0.424	0.688	-0.264
chr2-33615521-33617065	4.745	0	GATA2.H12CORE.1.P.B_GATA2.H12CORE.1.P.B	Sh2d3c	0.424	0.688	-0.264
chr7-109190630-109192251	-3.531	0	GATA2.H12CORE.0.PSM.A_GATA2.H12CORE.0.PSM.A	Apbb1	0.736	0.981	-0.245
chr7-109190630-109192251	-3.531	0	GATA2.H12CORE.0.PSM.A_GATA2.H12CORE.0.PSM.A	Apbb1	0.736	0.981	-0.245
chr6-88189264-88191083	-2.719	0.003	GATA2.H12CORE.0.PSM.A_GATA2.H12CORE.0.PSM.A	Nfu1	0.646	0.888	-0.242
chr6-88189264-88191083	-2.719	0.003	GATA2.H12CORE.0.PSM.A_GATA2.H12CORE.0.PSM.A	Nfu1	0.646	0.888	-0.242
chr6-88189264-88191083	-2.719	0.003	GATA2.H12CORE.0.PSM.A_GATA2.H12CORE.0.PSM.A	Nfu1	0.646	0.888	-0.242
chr6-88189264-88191083	-2.719	0.003	GATA2.H12CORE.1.P.B_GATA2.H12CORE.1.P.B	Nfu1	0.646	0.888	-0.242
chr6-88189264-88191083	-2.719	0.003	GATA2.H12CORE.1.P.B_GATA2.H12CORE.1.P.B	Nfu1	0.646	0.888	-0.242
chr6-88189264-88191083	-2.719	0.003	GATA2.H12CORE.1.P.B_GATA2.H12CORE.1.P.B	Nfu1	0.646	0.888	-0.242
chr6-88189264-88191083	-2.719	0.003	GATA2.H12CORE.1.P.B_GATA2.H12CORE.1.P.B	Nfu1	0.646	0.888	-0.242
chr6-88189264-88191083	-2.719	0.003	GATA2.H12CORE.1.P.B_GATA2.H12CORE.1.P.B	Nfu1	0.646	0.888	-0.242
chr6-88189264-88191083	-2.719	0.003	GATA2.H12CORE.0.PSM.A_GATA2.H12CORE.0.PSM.A	Nfu1	0.646	0.888	-0.242
chr6-88189264-88191083	-2.719	0.003	GATA2.H12CORE.0.PSM.A_GATA2.H12CORE.0.PSM.A	Nfu1	0.646	0.888	-0.242
chr6-88189264-88191083	-2.719	0.003	GATA2.H12CORE.0.PSM.A_GATA2.H12CORE.0.PSM.A	Nfu1	0.646	0.888	-0.242
chr6-88189264-88191083	-2.719	0.003	GATA2.H12CORE.1.P.B_GATA2.H12CORE.1.P.B	Nfu1	0.646	0.888	-0.242
chr6-88189264-88191083	-2.719	0.003	GATA2.H12CORE.1.P.B_GATA2.H12CORE.1.P.B	Nfu1	0.646	0.888	-0.242
chr6-88189264-88191083	-2.719	0.003	GATA2.H12CORE.1.P.B_GATA2.H12CORE.1.P.B	Nfu1	0.646	0.888	-0.242
chr6-88189264-88191083	-2.719	0.003	GATA2.H12CORE.1.P.B_GATA2.H12CORE.1.P.B	Nfu1	0.646	0.888	-0.242
chr6-88189264-88191083	-2.719	0.003	GATA2.H12CORE.1.P.B_GATA2.H12CORE.1.P.B	Nfu1	0.646	0.888	-0.242
chr4-109224475-109225927	-4.713	0	GATA2.H12CORE.0.PSM.A_GATA2.H12CORE.0.PSM.A	Zcchc11	1.078	1.287	-0.209
chr4-109224475-109225927	-4.713	0	GATA2.H12CORE.1.P.B_GATA2.H12CORE.1.P.B	Zcchc11	1.078	1.287	-0.209
chr4-109224475-109225927	-4.713	0	GATA2.H12CORE.0.PSM.A_GATA2.H12CORE.0.PSM.A	Zcchc11	1.078	1.287	-0.209
chr4-109224475-109225927	-4.713	0	GATA2.H12CORE.1.P.B_GATA2.H12CORE.1.P.B	Zcchc11	1.078	1.287	-0.209
chr18-35814237-35816482	3.489	0	GATA2.H12CORE.0.PSM.A_GATA2.H12CORE.0.PSM.A	Cxxc5	0.74	0.946	-0.206
chr18-35814237-35816482	3.489	0	GATA2.H12CORE.1.P.B_GATA2.H12CORE.1.P.B	Cxxc5	0.74	0.946	-0.206
chr18-35814237-35816482	3.489	0	GATA2.H12CORE.1.P.B_GATA2.H12CORE.1.P.B	Cxxc5	0.74	0.946	-0.206
chr18-35814237-35816482	3.489	0	GATA2.H12CORE.0.PSM.A_GATA2.H12CORE.0.PSM.A	Cxxc5	0.74	0.946	-0.206
chr18-35814237-35816482	3.489	0	GATA2.H12CORE.1.P.B_GATA2.H12CORE.1.P.B	Cxxc5	0.74	0.946	-0.206
chr18-35814237-35816482	3.489	0	GATA2.H12CORE.1.P.B_GATA2.H12CORE.1.P.B	Cxxc5	0.74	0.946	-0.206
chr18-35887369-35890083	4.556	0	GATA2.H12CORE.0.PSM.A_GATA2.H12CORE.0.PSM.A	Cxxc5	0.74	0.946	-0.206
chr18-35887369-35890083	4.556	0	GATA2.H12CORE.1.P.B_GATA2.H12CORE.1.P.B	Cxxc5	0.74	0.946	-0.206
chr18-35887369-35890083	4.556	0	GATA2.H12CORE.0.PSM.A_GATA2.H12CORE.0.PSM.A	Cxxc5	0.74	0.946	-0.206
chr18-35887369-35890083	4.556	0	GATA2.H12CORE.1.P.B_GATA2.H12CORE.1.P.B	Cxxc5	0.74	0.946	-0.206
chr9-61110890-61112484	5.26	0	GATA2.H12CORE.0.PSM.A_GATA2.H12CORE.0.PSM.A	Tle3	0.628	0.818	-0.189
chr9-61110890-61112484	5.26	0	GATA2.H12CORE.0.PSM.A_GATA2.H12CORE.0.PSM.A	Tle3	0.628	0.818	-0.189
chr9-61573216-61574498	4.264	0	GATA2.H12CORE.0.PSM.A_GATA2.H12CORE.0.PSM.A	Tle3	0.628	0.818	-0.189
chr9-61573216-61574498	4.264	0	GATA2.H12CORE.0.PSM.A_GATA2.H12CORE.0.PSM.A	Tle3	0.628	0.818	-0.189
chr9-61573216-61574498	4.264	0	GATA2.H12CORE.1.P.B_GATA2.H12CORE.1.P.B	Tle3	0.628	0.818	-0.189
chr9-61573216-61574498	4.264	0	GATA2.H12CORE.1.P.B_GATA2.H12CORE.1.P.B	Tle3	0.628	0.818	-0.189
chr9-61573216-61574498	4.264	0	GATA2.H12CORE.0.PSM.A_GATA2.H12CORE.0.PSM.A	Tle3	0.628	0.818	-0.189
chr9-61573216-61574498	4.264	0	GATA2.H12CORE.0.PSM.A_GATA2.H12CORE.0.PSM.A	Tle3	0.628	0.818	-0.189
chr9-61573216-61574498	4.264	0	GATA2.H12CORE.1.P.B_GATA2.H12CORE.1.P.B	Tle3	0.628	0.818	-0.189
chr9-61573216-61574498	4.264	0	GATA2.H12CORE.1.P.B_GATA2.H12CORE.1.P.B	Tle3	0.628	0.818	-0.189
chr11-102227380-102228571	4	0	GATA2.H12CORE.0.PSM.A_GATA2.H12CORE.0.PSM.A	Hdac5	0.253	0.441	-0.189
chr11-102227380-102228571	4	0	GATA2.H12CORE.1.P.B_GATA2.H12CORE.1.P.B	Hdac5	0.253	0.441	-0.189
chr11-102227380-102228571	4	0	GATA2.H12CORE.0.PSM.A_GATA2.H12CORE.0.PSM.A	Hdac5	0.253	0.441	-0.189
chr11-102227380-102228571	4	0	GATA2.H12CORE.1.P.B_GATA2.H12CORE.1.P.B	Hdac5	0.253	0.441	-0.189
chr8-122719602-122721611	2.465	0.007	GATA2.H12CORE.0.PSM.A_GATA2.H12CORE.0.PSM.A	Tcf25	1.153	1.334	-0.18
chr8-122719602-122721611	2.465	0.007	GATA2.H12CORE.1.P.B_GATA2.H12CORE.1.P.B	Tcf25	1.153	1.334	-0.18
chr8-122719602-122721611	2.465	0.007	GATA2.H12CORE.1.P.B_GATA2.H12CORE.1.P.B	Tcf25	1.153	1.334	-0.18
chr8-122719602-122721611	2.465	0.007	GATA2.H12CORE.0.PSM.A_GATA2.H12CORE.0.PSM.A	Tcf25	1.153	1.334	-0.18
chr8-122719602-122721611	2.465	0.007	GATA2.H12CORE.1.P.B_GATA2.H12CORE.1.P.B	Tcf25	1.153	1.334	-0.18
chr8-122719602-122721611	2.465	0.007	GATA2.H12CORE.1.P.B_GATA2.H12CORE.1.P.B	Tcf25	1.153	1.334	-0.18
chr8-122719602-122721611	4.223	0	GATA2.H12CORE.0.PSM.A_GATA2.H12CORE.0.PSM.A	Tubb3	4.707	4.887	-0.18
chr8-122719602-122721611	4.223	0	GATA2.H12CORE.1.P.B_GATA2.H12CORE.1.P.B	Tubb3	4.707	4.887	-0.18
chr8-122719602-122721611	4.223	0	GATA2.H12CORE.1.P.B_GATA2.H12CORE.1.P.B	Tubb3	4.707	4.887	-0.18
chr8-122719602-122721611	4.223	0	GATA2.H12CORE.0.PSM.A_GATA2.H12CORE.0.PSM.A	Tubb3	4.707	4.887	-0.18
chr8-122719602-122721611	4.223	0	GATA2.H12CORE.1.P.B_GATA2.H12CORE.1.P.B	Tubb3	4.707	4.887	-0.18
chr8-122719602-122721611	4.223	0	GATA2.H12CORE.1.P.B_GATA2.H12CORE.1.P.B	Tubb3	4.707	4.887	-0.18
chr8-84729810-84732148	-5.08	0	GATA2.H12CORE.0.PSM.A_GATA2.H12CORE.0.PSM.A	Orc6	0.592	0.769	-0.177
chr8-84729810-84732148	-5.08	0	GATA2.H12CORE.1.P.B_GATA2.H12CORE.1.P.B	Orc6	0.592	0.769	-0.177
chr8-84729810-84732148	-5.08	0	GATA2.H12CORE.1.P.B_GATA2.H12CORE.1.P.B	Orc6	0.592	0.769	-0.177
chr8-84729810-84732148	-5.08	0	GATA2.H12CORE.0.PSM.A_GATA2.H12CORE.0.PSM.A	Orc6	0.592	0.769	-0.177
chr8-84729810-84732148	-5.08	0	GATA2.H12CORE.1.P.B_GATA2.H12CORE.1.P.B	Orc6	0.592	0.769	-0.177
chr8-84729810-84732148	-5.08	0	GATA2.H12CORE.1.P.B_GATA2.H12CORE.1.P.B	Orc6	0.592	0.769	-0.177
chr7-30532717-30533299	-2.332	0.01	GATA2.H12CORE.0.PSM.A_GATA2.H12CORE.0.PSM.A	Nfkbib	0.292	0.461	-0.169
chr7-30532717-30533299	-2.332	0.01	GATA2.H12CORE.0.PSM.A_GATA2.H12CORE.0.PSM.A	Nfkbib	0.292	0.461	-0.169
chr1-75445085-75447030	2.527	0.006	GATA2.H12CORE.0.PSM.A_GATA2.H12CORE.0.PSM.A	Gmppa	0.216	0.381	-0.165
chr1-75445085-75447030	2.527	0.006	GATA2.H12CORE.1.P.B_GATA2.H12CORE.1.P.B	Gmppa	0.216	0.381	-0.165
chr1-75445085-75447030	2.527	0.006	GATA2.H12CORE.0.PSM.A_GATA2.H12CORE.0.PSM.A	Gmppa	0.216	0.381	-0.165
chr1-75445085-75447030	2.527	0.006	GATA2.H12CORE.1.P.B_GATA2.H12CORE.1.P.B	Gmppa	0.216	0.381	-0.165
chr5-114590119-114591611	3.901	0	GATA2.H12CORE.0.PSM.A_GATA2.H12CORE.0.PSM.A	Coro1c	0.644	0.798	-0.154
chr5-114590119-114591611	3.901	0	GATA2.H12CORE.0.PSM.A_GATA2.H12CORE.0.PSM.A	Coro1c	0.644	0.798	-0.154
chr5-114590119-114591611	3.901	0	GATA2.H12CORE.0.PSM.A_GATA2.H12CORE.0.PSM.A	Coro1c	0.644	0.798	-0.154
chr5-114590119-114591611	3.901	0	GATA2.H12CORE.1.P.B_GATA2.H12CORE.1.P.B	Coro1c	0.644	0.798	-0.154
chr5-114590119-114591611	3.901	0	GATA2.H12CORE.1.P.B_GATA2.H12CORE.1.P.B	Coro1c	0.644	0.798	-0.154
chr5-114590119-114591611	3.901	0	GATA2.H12CORE.1.P.B_GATA2.H12CORE.1.P.B	Coro1c	0.644	0.798	-0.154
chr5-114590119-114591611	3.901	0	GATA2.H12CORE.0.PSM.A_GATA2.H12CORE.0.PSM.A	Coro1c	0.644	0.798	-0.154
chr5-114590119-114591611	3.901	0	GATA2.H12CORE.0.PSM.A_GATA2.H12CORE.0.PSM.A	Coro1c	0.644	0.798	-0.154
chr5-114590119-114591611	3.901	0	GATA2.H12CORE.0.PSM.A_GATA2.H12CORE.0.PSM.A	Coro1c	0.644	0.798	-0.154
chr5-114590119-114591611	3.901	0	GATA2.H12CORE.1.P.B_GATA2.H12CORE.1.P.B	Coro1c	0.644	0.798	-0.154
chr5-114590119-114591611	3.901	0	GATA2.H12CORE.1.P.B_GATA2.H12CORE.1.P.B	Coro1c	0.644	0.798	-0.154
chr5-114590119-114591611	3.901	0	GATA2.H12CORE.1.P.B_GATA2.H12CORE.1.P.B	Coro1c	0.644	0.798	-0.154
chr8-84729810-84732148	2.53	0.006	GATA2.H12CORE.0.PSM.A_GATA2.H12CORE.0.PSM.A	Ier2	0.922	1.075	-0.153
chr8-84729810-84732148	2.53	0.006	GATA2.H12CORE.1.P.B_GATA2.H12CORE.1.P.B	Ier2	0.922	1.075	-0.153
chr8-84729810-84732148	2.53	0.006	GATA2.H12CORE.1.P.B_GATA2.H12CORE.1.P.B	Ier2	0.922	1.075	-0.153
chr4-117644634-117647845	3.077	0.001	GATA2.H12CORE.0.PSM.A_GATA2.H12CORE.0.PSM.A	Eri3	0.474	0.625	-0.151
chr4-117644634-117647845	3.077	0.001	GATA2.H12CORE.1.P.B_GATA2.H12CORE.1.P.B	Eri3	0.474	0.625	-0.151
chr4-117644634-117647845	3.077	0.001	GATA2.H12CORE.0.PSM.A_GATA2.H12CORE.0.PSM.A	Eri3	0.474	0.625	-0.151
chr4-117644634-117647845	3.077	0.001	GATA2.H12CORE.1.P.B_GATA2.H12CORE.1.P.B	Eri3	0.474	0.625	-0.151
chr1-75445085-75447030	2.557	0.005	GATA2.H12CORE.0.PSM.A_GATA2.H12CORE.0.PSM.A	Speg	0.115	0.262	-0.147
chr1-75445085-75447030	2.557	0.005	GATA2.H12CORE.1.P.B_GATA2.H12CORE.1.P.B	Speg	0.115	0.262	-0.147
chr1-75445085-75447030	2.557	0.005	GATA2.H12CORE.0.PSM.A_GATA2.H12CORE.0.PSM.A	Speg	0.115	0.262	-0.147
chr1-75445085-75447030	2.557	0.005	GATA2.H12CORE.1.P.B_GATA2.H12CORE.1.P.B	Speg	0.115	0.262	-0.147
chr2-26500037-26501126	-3.57	0	GATA2.H12CORE.1.P.B_GATA2.H12CORE.1.P.B	Npdc1	1.579	1.721	-0.142
chr2-26500037-26501126	-3.57	0	GATA2.H12CORE.1.P.B_GATA2.H12CORE.1.P.B	Npdc1	1.579	1.721	-0.142
chr19-46503395-46504292	-2.773	0.003	GATA2.H12CORE.0.PSM.A_GATA2.H12CORE.0.PSM.A	Sorcs3	0.008	0.146	-0.138
chr19-46503395-46504292	-2.773	0.003	GATA2.H12CORE.1.P.B_GATA2.H12CORE.1.P.B	Sorcs3	0.008	0.146	-0.138
chr19-46503395-46504292	-2.773	0.003	GATA2.H12CORE.0.PSM.A_GATA2.H12CORE.0.PSM.A	Sorcs3	0.008	0.146	-0.138
chr19-46503395-46504292	-2.773	0.003	GATA2.H12CORE.1.P.B_GATA2.H12CORE.1.P.B	Sorcs3	0.008	0.146	-0.138
chr15-77152355-77154161	2.48	0.007	GATA2.H12CORE.0.PSM.A_GATA2.H12CORE.0.PSM.A	Sharpin	0.275	0.412	-0.137
chr15-77152355-77154161	2.48	0.007	GATA2.H12CORE.0.PSM.A_GATA2.H12CORE.0.PSM.A	Sharpin	0.275	0.412	-0.137
chr5-114776222-114776466	2.425	0.008	GATA2.H12CORE.0.PSM.A_GATA2.H12CORE.0.PSM.A	Dynll1	3.439	3.575	-0.137
chr5-114776222-114776466	2.425	0.008	GATA2.H12CORE.0.PSM.A_GATA2.H12CORE.0.PSM.A	Dynll1	3.439	3.575	-0.137
chr2-29039946-29041718	2.85	0.002	GATA2.H12CORE.0.PSM.A_GATA2.H12CORE.0.PSM.A	Ralgds	0.577	0.71	-0.133
chr2-29039946-29041718	2.85	0.002	GATA2.H12CORE.0.PSM.A_GATA2.H12CORE.0.PSM.A	Ralgds	0.577	0.71	-0.133
chr8-84729810-84732148	-2.417	0.008	GATA2.H12CORE.0.PSM.A_GATA2.H12CORE.0.PSM.A	Mast1	0.131	0.262	-0.131
chr8-84729810-84732148	-2.417	0.008	GATA2.H12CORE.1.P.B_GATA2.H12CORE.1.P.B	Mast1	0.131	0.262	-0.131
chr8-84729810-84732148	-2.417	0.008	GATA2.H12CORE.1.P.B_GATA2.H12CORE.1.P.B	Mast1	0.131	0.262	-0.131
chr8-84729810-84732148	-2.417	0.008	GATA2.H12CORE.0.PSM.A_GATA2.H12CORE.0.PSM.A	Mast1	0.131	0.262	-0.131
chr8-84729810-84732148	-2.417	0.008	GATA2.H12CORE.1.P.B_GATA2.H12CORE.1.P.B	Mast1	0.131	0.262	-0.131
chr8-84729810-84732148	-2.417	0.008	GATA2.H12CORE.1.P.B_GATA2.H12CORE.1.P.B	Mast1	0.131	0.262	-0.131
chr2-26500037-26501126	-3.873	0	GATA2.H12CORE.1.P.B_GATA2.H12CORE.1.P.B	Rnf208	0.153	0.28	-0.127
chr2-26500037-26501126	-3.873	0	GATA2.H12CORE.1.P.B_GATA2.H12CORE.1.P.B	Rnf208	0.153	0.28	-0.127
chr11-120279311-120281135	2.842	0.002	GATA2.H12CORE.0.PSM.A_GATA2.H12CORE.0.PSM.A	Arl16	0.352	0.479	-0.126
chr11-120279311-120281135	2.842	0.002	GATA2.H12CORE.1.P.B_GATA2.H12CORE.1.P.B	Arl16	0.352	0.479	-0.126
chr11-120279311-120281135	2.842	0.002	GATA2.H12CORE.0.PSM.A_GATA2.H12CORE.0.PSM.A	Arl16	0.352	0.479	-0.126
chr11-120279311-120281135	2.842	0.002	GATA2.H12CORE.1.P.B_GATA2.H12CORE.1.P.B	Arl16	0.352	0.479	-0.126
chr8-84729810-84732148	-3.302	0	GATA2.H12CORE.0.PSM.A_GATA2.H12CORE.0.PSM.A	Fbxw9	0.229	0.35	-0.121
chr8-84729810-84732148	-3.302	0	GATA2.H12CORE.1.P.B_GATA2.H12CORE.1.P.B	Fbxw9	0.229	0.35	-0.121
chr8-84729810-84732148	-3.302	0	GATA2.H12CORE.1.P.B_GATA2.H12CORE.1.P.B	Fbxw9	0.229	0.35	-0.121
chr8-84729810-84732148	-3.302	0	GATA2.H12CORE.0.PSM.A_GATA2.H12CORE.0.PSM.A	Fbxw9	0.229	0.35	-0.121
chr8-84729810-84732148	-3.302	0	GATA2.H12CORE.1.P.B_GATA2.H12CORE.1.P.B	Fbxw9	0.229	0.35	-0.121
chr8-84729810-84732148	-3.302	0	GATA2.H12CORE.1.P.B_GATA2.H12CORE.1.P.B	Fbxw9	0.229	0.35	-0.121
chr13-51917632-51919699	3.05	0.001	GATA2.H12CORE.1.P.B_GATA2.H12CORE.1.P.B	Cks2	0.202	0.321	-0.119
chr13-51917632-51919699	3.05	0.001	GATA2.H12CORE.1.P.B_GATA2.H12CORE.1.P.B	Cks2	0.202	0.321	-0.119
chr14-54430422-54433714	-2.571	0.005	GATA2.H12CORE.0.PSM.A_GATA2.H12CORE.0.PSM.A	Slc22a17	0.667	0.785	-0.118
chr14-54430422-54433714	-2.571	0.005	GATA2.H12CORE.1.P.B_GATA2.H12CORE.1.P.B	Slc22a17	0.667	0.785	-0.118
chr14-54430422-54433714	-2.571	0.005	GATA2.H12CORE.0.PSM.A_GATA2.H12CORE.0.PSM.A	Slc22a17	0.667	0.785	-0.118
chr14-54430422-54433714	-2.571	0.005	GATA2.H12CORE.1.P.B_GATA2.H12CORE.1.P.B	Slc22a17	0.667	0.785	-0.118
chr4-117644634-117647845	3.759	0	GATA2.H12CORE.0.PSM.A_GATA2.H12CORE.0.PSM.A	Atp6v0b	2.04	2.155	-0.116
chr4-117644634-117647845	3.759	0	GATA2.H12CORE.1.P.B_GATA2.H12CORE.1.P.B	Atp6v0b	2.04	2.155	-0.116
chr4-117644634-117647845	3.759	0	GATA2.H12CORE.0.PSM.A_GATA2.H12CORE.0.PSM.A	Atp6v0b	2.04	2.155	-0.116
chr4-117644634-117647845	3.759	0	GATA2.H12CORE.1.P.B_GATA2.H12CORE.1.P.B	Atp6v0b	2.04	2.155	-0.116
chr9-57505347-57506328	-3.162	0.001	GATA2.H12CORE.0.PSM.A_GATA2.H12CORE.0.PSM.A	Imp3	0.906	1.018	-0.112
chr9-57505347-57506328	-3.162	0.001	GATA2.H12CORE.1.P.B_GATA2.H12CORE.1.P.B	Imp3	0.906	1.018	-0.112
chr2-33615521-33617065	2.75	0.003	GATA2.H12CORE.1.P.B_GATA2.H12CORE.1.P.B	Ralgps1	0.256	0.367	-0.111
chr2-33615521-33617065	2.75	0.003	GATA2.H12CORE.1.P.B_GATA2.H12CORE.1.P.B	Ralgps1	0.256	0.367	-0.111
chr2-165135628-165136993	-2.38	0.009	GATA2.H12CORE.0.PSM.A_GATA2.H12CORE.0.PSM.A	Zmynd8	0.482	0.59	-0.108
chr2-165135628-165136993	-2.38	0.009	GATA2.H12CORE.0.PSM.A_GATA2.H12CORE.0.PSM.A	Zmynd8	0.482	0.59	-0.108
chr1-75445085-75447030	2.71	0.003	GATA2.H12CORE.0.PSM.A_GATA2.H12CORE.0.PSM.A	Tmem198	0.578	0.682	-0.104
chr1-75445085-75447030	2.71	0.003	GATA2.H12CORE.1.P.B_GATA2.H12CORE.1.P.B	Tmem198	0.578	0.682	-0.104
chr1-75445085-75447030	2.71	0.003	GATA2.H12CORE.0.PSM.A_GATA2.H12CORE.0.PSM.A	Tmem198	0.578	0.682	-0.104
chr1-75445085-75447030	2.71	0.003	GATA2.H12CORE.1.P.B_GATA2.H12CORE.1.P.B	Tmem198	0.578	0.682	-0.104
chr1-75448932-75450868	2.68	0.004	GATA2.H12CORE.0.PSM.A_GATA2.H12CORE.0.PSM.A	Tmem198	0.578	0.682	-0.104
chr1-75448932-75450868	2.68	0.004	GATA2.H12CORE.1.P.B_GATA2.H12CORE.1.P.B	Tmem198	0.578	0.682	-0.104
chr1-75448932-75450868	2.68	0.004	GATA2.H12CORE.0.PSM.A_GATA2.H12CORE.0.PSM.A	Tmem198	0.578	0.682	-0.104
chr1-75448932-75450868	2.68	0.004	GATA2.H12CORE.1.P.B_GATA2.H12CORE.1.P.B	Tmem198	0.578	0.682	-0.104
chr2-33615521-33617065	3.632	0	GATA2.H12CORE.1.P.B_GATA2.H12CORE.1.P.B	Dpm2	0.791	0.896	-0.104
chr2-33615521-33617065	3.632	0	GATA2.H12CORE.1.P.B_GATA2.H12CORE.1.P.B	Dpm2	0.791	0.896	-0.104
chr7-99474023-99475435	3.637	0	GATA2.H12CORE.1.P.B_GATA2.H12CORE.1.P.B	Emsy	0.665	0.769	-0.104
chr7-99474023-99475435	3.637	0	GATA2.H12CORE.1.P.B_GATA2.H12CORE.1.P.B	Emsy	0.665	0.769	-0.104
chr9-107369329-107370687	-4.424	0	GATA2.H12CORE.0.PSM.A_GATA2.H12CORE.0.PSM.A	Rassf1	0.479	0.582	-0.103
chr9-107369329-107370687	-4.424	0	GATA2.H12CORE.1.P.B_GATA2.H12CORE.1.P.B	Rassf1	0.479	0.582	-0.103
chr9-107369329-107370687	-4.424	0	GATA2.H12CORE.0.PSM.A_GATA2.H12CORE.0.PSM.A	Rassf1	0.479	0.582	-0.103
chr9-107369329-107370687	-4.424	0	GATA2.H12CORE.1.P.B_GATA2.H12CORE.1.P.B	Rassf1	0.479	0.582	-0.103
chr2-33615521-33617065	2.585	0.005	GATA2.H12CORE.1.P.B_GATA2.H12CORE.1.P.B	Prrc2b	0.835	0.938	-0.103
chr2-33615521-33617065	2.585	0.005	GATA2.H12CORE.1.P.B_GATA2.H12CORE.1.P.B	Prrc2b	0.835	0.938	-0.103
chr15-99636844-99638249	-3.192	0.001	GATA2.H12CORE.0.PSM.A_GATA2.H12CORE.0.PSM.A	Tuba1b	1.587	1.69	-0.103
chr15-99636844-99638249	-3.192	0.001	GATA2.H12CORE.1.P.B_GATA2.H12CORE.1.P.B	Tuba1b	1.587	1.69	-0.103
chr15-99636844-99638249	-3.192	0.001	GATA2.H12CORE.0.PSM.A_GATA2.H12CORE.0.PSM.A	Tuba1b	1.587	1.69	-0.103
chr15-99636844-99638249	-3.192	0.001	GATA2.H12CORE.1.P.B_GATA2.H12CORE.1.P.B	Tuba1b	1.587	1.69	-0.103
chr15-99663969-99665409	-3.425	0	GATA2.H12CORE.0.PSM.A_GATA2.H12CORE.0.PSM.A	Tuba1b	1.587	1.69	-0.103
chr15-99663969-99665409	-3.425	0	GATA2.H12CORE.1.P.B_GATA2.H12CORE.1.P.B	Tuba1b	1.587	1.69	-0.103
chr15-99663969-99665409	-3.425	0	GATA2.H12CORE.1.P.B_GATA2.H12CORE.1.P.B	Tuba1b	1.587	1.69	-0.103
chr15-99663969-99665409	-3.425	0	GATA2.H12CORE.0.PSM.A_GATA2.H12CORE.0.PSM.A	Tuba1b	1.587	1.69	-0.103
chr15-99663969-99665409	-3.425	0	GATA2.H12CORE.1.P.B_GATA2.H12CORE.1.P.B	Tuba1b	1.587	1.69	-0.103
chr15-99663969-99665409	-3.425	0	GATA2.H12CORE.1.P.B_GATA2.H12CORE.1.P.B	Tuba1b	1.587	1.69	-0.103
chr8-122719602-122721611	2.395	0.008	GATA2.H12CORE.0.PSM.A_GATA2.H12CORE.0.PSM.A	Vps9d1	0.479	0.58	-0.101
chr8-122719602-122721611	2.395	0.008	GATA2.H12CORE.1.P.B_GATA2.H12CORE.1.P.B	Vps9d1	0.479	0.58	-0.101
chr8-122719602-122721611	2.395	0.008	GATA2.H12CORE.1.P.B_GATA2.H12CORE.1.P.B	Vps9d1	0.479	0.58	-0.101
chr8-122719602-122721611	2.395	0.008	GATA2.H12CORE.0.PSM.A_GATA2.H12CORE.0.PSM.A	Vps9d1	0.479	0.58	-0.101
chr8-122719602-122721611	2.395	0.008	GATA2.H12CORE.1.P.B_GATA2.H12CORE.1.P.B	Vps9d1	0.479	0.58	-0.101
chr8-122719602-122721611	2.395	0.008	GATA2.H12CORE.1.P.B_GATA2.H12CORE.1.P.B	Vps9d1	0.479	0.58	-0.101
chr12-54286666-54289024	2.54	0.006	GATA2.H12CORE.1.P.B_GATA2.H12CORE.1.P.B	Npas3	0.345	0.445	-0.1
chr12-54286666-54289024	2.54	0.006	GATA2.H12CORE.1.P.B_GATA2.H12CORE.1.P.B	Npas3	0.345	0.445	-0.1
chr4-117644634-117647845	-3.715	0	GATA2.H12CORE.0.PSM.A_GATA2.H12CORE.0.PSM.A	Ptprf	0.677	0.776	-0.1
chr4-117644634-117647845	-3.715	0	GATA2.H12CORE.1.P.B_GATA2.H12CORE.1.P.B	Ptprf	0.677	0.776	-0.1
chr4-117644634-117647845	-3.715	0	GATA2.H12CORE.0.PSM.A_GATA2.H12CORE.0.PSM.A	Ptprf	0.677	0.776	-0.1
chr4-117644634-117647845	-3.715	0	GATA2.H12CORE.1.P.B_GATA2.H12CORE.1.P.B	Ptprf	0.677	0.776	-0.1
chr18-64264544-64266944	3.141	0.001	GATA2.H12CORE.0.PSM.A_GATA2.H12CORE.0.PSM.A	St8sia3	0.2	0.299	-0.099
chr18-64264544-64266944	3.141	0.001	GATA2.H12CORE.0.PSM.A_GATA2.H12CORE.0.PSM.A	St8sia3	0.2	0.299	-0.099
chr4-47449028-47450664	6.793	0	GATA2.H12CORE.0.PSM.A_GATA2.H12CORE.0.PSM.A	Nr4a3	0.093	0.191	-0.098
chr4-47449028-47450664	6.793	0	GATA2.H12CORE.1.P.B_GATA2.H12CORE.1.P.B	Nr4a3	0.093	0.191	-0.098
chr4-47449028-47450664	6.793	0	GATA2.H12CORE.0.PSM.A_GATA2.H12CORE.0.PSM.A	Nr4a3	0.093	0.191	-0.098
chr4-47449028-47450664	6.793	0	GATA2.H12CORE.1.P.B_GATA2.H12CORE.1.P.B	Nr4a3	0.093	0.191	-0.098
chr18-64264544-64266944	2.813	0.002	GATA2.H12CORE.0.PSM.A_GATA2.H12CORE.0.PSM.A	Nedd4l	0.614	0.71	-0.096
chr18-64264544-64266944	2.813	0.002	GATA2.H12CORE.0.PSM.A_GATA2.H12CORE.0.PSM.A	Nedd4l	0.614	0.71	-0.096
chr15-85652611-85654383	-2.967	0.002	GATA2.H12CORE.0.PSM.A_GATA2.H12CORE.0.PSM.A	Atxn10	1.924	2.019	-0.095
chr15-85652611-85654383	-2.967	0.002	GATA2.H12CORE.1.P.B_GATA2.H12CORE.1.P.B	Atxn10	1.924	2.019	-0.095
chr15-85652611-85654383	-2.967	0.002	GATA2.H12CORE.0.PSM.A_GATA2.H12CORE.0.PSM.A	Atxn10	1.924	2.019	-0.095
chr15-85652611-85654383	-2.967	0.002	GATA2.H12CORE.1.P.B_GATA2.H12CORE.1.P.B	Atxn10	1.924	2.019	-0.095
chr14-54430422-54433714	-2.341	0.01	GATA2.H12CORE.0.PSM.A_GATA2.H12CORE.0.PSM.A	Jph4	0.224	0.318	-0.095
chr14-54430422-54433714	-2.341	0.01	GATA2.H12CORE.1.P.B_GATA2.H12CORE.1.P.B	Jph4	0.224	0.318	-0.095
chr14-54430422-54433714	-2.341	0.01	GATA2.H12CORE.0.PSM.A_GATA2.H12CORE.0.PSM.A	Jph4	0.224	0.318	-0.095
chr14-54430422-54433714	-2.341	0.01	GATA2.H12CORE.1.P.B_GATA2.H12CORE.1.P.B	Jph4	0.224	0.318	-0.095
chr2-33615521-33617065	-5.586	0	GATA2.H12CORE.1.P.B_GATA2.H12CORE.1.P.B	Swi5	1.99	2.084	-0.094
chr2-33615521-33617065	-5.586	0	GATA2.H12CORE.1.P.B_GATA2.H12CORE.1.P.B	Swi5	1.99	2.084	-0.094
chr1-133491895-133493784	-3.285	0.001	GATA2.H12CORE.0.PSM.A_GATA2.H12CORE.0.PSM.A	Lrrn2	0.045	0.138	-0.092
chr1-133491895-133493784	-3.285	0.001	GATA2.H12CORE.0.PSM.A_GATA2.H12CORE.0.PSM.A	Lrrn2	0.045	0.138	-0.092
chr8-84729810-84732148	-2.366	0.009	GATA2.H12CORE.0.PSM.A_GATA2.H12CORE.0.PSM.A	Itfg1	0.364	0.455	-0.092
chr8-84729810-84732148	-2.366	0.009	GATA2.H12CORE.1.P.B_GATA2.H12CORE.1.P.B	Itfg1	0.364	0.455	-0.092
chr8-84729810-84732148	-2.366	0.009	GATA2.H12CORE.1.P.B_GATA2.H12CORE.1.P.B	Itfg1	0.364	0.455	-0.092
chr8-84729810-84732148	-2.366	0.009	GATA2.H12CORE.0.PSM.A_GATA2.H12CORE.0.PSM.A	Itfg1	0.364	0.455	-0.092
chr8-84729810-84732148	-2.366	0.009	GATA2.H12CORE.1.P.B_GATA2.H12CORE.1.P.B	Itfg1	0.364	0.455	-0.092
chr8-84729810-84732148	-2.366	0.009	GATA2.H12CORE.1.P.B_GATA2.H12CORE.1.P.B	Itfg1	0.364	0.455	-0.092
chr2-33615521-33617065	2.656	0.004	GATA2.H12CORE.1.P.B_GATA2.H12CORE.1.P.B	6330409D20Rik	0.012	0.101	-0.089
chr2-33615521-33617065	2.656	0.004	GATA2.H12CORE.1.P.B_GATA2.H12CORE.1.P.B	6330409D20Rik	0.012	0.101	-0.089
chr2-29039946-29041718	2.946	0.002	GATA2.H12CORE.0.PSM.A_GATA2.H12CORE.0.PSM.A	Rapgef1	0.176	0.262	-0.087
chr2-29039946-29041718	2.946	0.002	GATA2.H12CORE.0.PSM.A_GATA2.H12CORE.0.PSM.A	Rapgef1	0.176	0.262	-0.087
chr1-132738799-132739614	2.641	0.004	GATA2.H12CORE.1.P.B_GATA2.H12CORE.1.P.B	Cntn2	0.101	0.187	-0.086
chr1-132738799-132739614	2.641	0.004	GATA2.H12CORE.1.P.B_GATA2.H12CORE.1.P.B	Cntn2	0.101	0.187	-0.086
chr1-133491895-133493784	-2.828	0.002	GATA2.H12CORE.0.PSM.A_GATA2.H12CORE.0.PSM.A	Cntn2	0.101	0.187	-0.086
chr1-133491895-133493784	-2.828	0.002	GATA2.H12CORE.0.PSM.A_GATA2.H12CORE.0.PSM.A	Cntn2	0.101	0.187	-0.086
chr14-54430422-54433714	-2.938	0.002	GATA2.H12CORE.0.PSM.A_GATA2.H12CORE.0.PSM.A	Myh7	0.242	0.327	-0.086
chr14-54430422-54433714	-2.938	0.002	GATA2.H12CORE.1.P.B_GATA2.H12CORE.1.P.B	Myh7	0.242	0.327	-0.086
chr14-54430422-54433714	-2.938	0.002	GATA2.H12CORE.0.PSM.A_GATA2.H12CORE.0.PSM.A	Myh7	0.242	0.327	-0.086
chr14-54430422-54433714	-2.938	0.002	GATA2.H12CORE.1.P.B_GATA2.H12CORE.1.P.B	Myh7	0.242	0.327	-0.086
chr14-54430422-54433714	3.123	0.001	GATA2.H12CORE.0.PSM.A_GATA2.H12CORE.0.PSM.A	Prmt5	0.362	0.447	-0.085
chr14-54430422-54433714	3.123	0.001	GATA2.H12CORE.1.P.B_GATA2.H12CORE.1.P.B	Prmt5	0.362	0.447	-0.085
chr14-54430422-54433714	3.123	0.001	GATA2.H12CORE.0.PSM.A_GATA2.H12CORE.0.PSM.A	Prmt5	0.362	0.447	-0.085
chr14-54430422-54433714	3.123	0.001	GATA2.H12CORE.1.P.B_GATA2.H12CORE.1.P.B	Prmt5	0.362	0.447	-0.085
chr11-120279311-120281135	3.945	0	GATA2.H12CORE.0.PSM.A_GATA2.H12CORE.0.PSM.A	Mcrip1	1.586	1.67	-0.085
chr11-120279311-120281135	3.945	0	GATA2.H12CORE.1.P.B_GATA2.H12CORE.1.P.B	Mcrip1	1.586	1.67	-0.085
chr11-120279311-120281135	3.945	0	GATA2.H12CORE.0.PSM.A_GATA2.H12CORE.0.PSM.A	Mcrip1	1.586	1.67	-0.085
chr11-120279311-120281135	3.945	0	GATA2.H12CORE.1.P.B_GATA2.H12CORE.1.P.B	Mcrip1	1.586	1.67	-0.085
chr11-102227380-102228571	-3.922	0	GATA2.H12CORE.0.PSM.A_GATA2.H12CORE.0.PSM.A	Fam171a2	0.793	0.876	-0.083
chr11-102227380-102228571	-3.922	0	GATA2.H12CORE.1.P.B_GATA2.H12CORE.1.P.B	Fam171a2	0.793	0.876	-0.083
chr11-102227380-102228571	-3.922	0	GATA2.H12CORE.0.PSM.A_GATA2.H12CORE.0.PSM.A	Fam171a2	0.793	0.876	-0.083
chr11-102227380-102228571	-3.922	0	GATA2.H12CORE.1.P.B_GATA2.H12CORE.1.P.B	Fam171a2	0.793	0.876	-0.083
chr11-102227380-102228571	2.966	0.002	GATA2.H12CORE.0.PSM.A_GATA2.H12CORE.0.PSM.A	Lsm12	0.85	0.93	-0.081
chr11-102227380-102228571	2.966	0.002	GATA2.H12CORE.1.P.B_GATA2.H12CORE.1.P.B	Lsm12	0.85	0.93	-0.081
chr11-102227380-102228571	2.966	0.002	GATA2.H12CORE.0.PSM.A_GATA2.H12CORE.0.PSM.A	Lsm12	0.85	0.93	-0.081
chr11-102227380-102228571	2.966	0.002	GATA2.H12CORE.1.P.B_GATA2.H12CORE.1.P.B	Lsm12	0.85	0.93	-0.081
chr14-54430422-54433714	-2.657	0.004	GATA2.H12CORE.0.PSM.A_GATA2.H12CORE.0.PSM.A	Emc9	0.039	0.119	-0.08
chr14-54430422-54433714	-2.657	0.004	GATA2.H12CORE.1.P.B_GATA2.H12CORE.1.P.B	Emc9	0.039	0.119	-0.08
chr14-54430422-54433714	-2.657	0.004	GATA2.H12CORE.0.PSM.A_GATA2.H12CORE.0.PSM.A	Emc9	0.039	0.119	-0.08
chr14-54430422-54433714	-2.657	0.004	GATA2.H12CORE.1.P.B_GATA2.H12CORE.1.P.B	Emc9	0.039	0.119	-0.08
chr7-109114530-109116326	-2.737	0.003	GATA2.H12CORE.0.PSM.A_GATA2.H12CORE.0.PSM.A	Ilk	0.468	0.547	-0.079
chr7-109114530-109116326	-2.737	0.003	GATA2.H12CORE.1.P.B_GATA2.H12CORE.1.P.B	Ilk	0.468	0.547	-0.079
chr7-109114530-109116326	-2.737	0.003	GATA2.H12CORE.1.P.B_GATA2.H12CORE.1.P.B	Ilk	0.468	0.547	-0.079
chr7-109114530-109116326	-2.737	0.003	GATA2.H12CORE.0.PSM.A_GATA2.H12CORE.0.PSM.A	Ilk	0.468	0.547	-0.079
chr7-109114530-109116326	-2.737	0.003	GATA2.H12CORE.1.P.B_GATA2.H12CORE.1.P.B	Ilk	0.468	0.547	-0.079
chr7-109114530-109116326	-2.737	0.003	GATA2.H12CORE.1.P.B_GATA2.H12CORE.1.P.B	Ilk	0.468	0.547	-0.079
chr2-26500037-26501126	-3.759	0	GATA2.H12CORE.1.P.B_GATA2.H12CORE.1.P.B	Paxx	0.563	0.642	-0.079
chr2-26500037-26501126	-3.759	0	GATA2.H12CORE.1.P.B_GATA2.H12CORE.1.P.B	Paxx	0.563	0.642	-0.079
chr16-37990318-37991452	-3.444	0	GATA2.H12CORE.1.P.B_GATA2.H12CORE.1.P.B	Adprh	1.074	1.151	-0.076
chr16-37990318-37991452	-3.444	0	GATA2.H12CORE.1.P.B_GATA2.H12CORE.1.P.B	Adprh	1.074	1.151	-0.076
chr11-116660970-116662402	2.885	0.002	GATA2.H12CORE.1.P.B_GATA2.H12CORE.1.P.B	Mrpl38	0.587	0.662	-0.075
chr11-116660970-116662402	2.885	0.002	GATA2.H12CORE.1.P.B_GATA2.H12CORE.1.P.B	Mrpl38	0.587	0.662	-0.075
chr7-109114530-109116326	-4.425	0	GATA2.H12CORE.0.PSM.A_GATA2.H12CORE.0.PSM.A	Tmem41b	0.323	0.396	-0.073
chr7-109114530-109116326	-4.425	0	GATA2.H12CORE.1.P.B_GATA2.H12CORE.1.P.B	Tmem41b	0.323	0.396	-0.073
chr7-109114530-109116326	-4.425	0	GATA2.H12CORE.1.P.B_GATA2.H12CORE.1.P.B	Tmem41b	0.323	0.396	-0.073
chr7-109114530-109116326	-4.425	0	GATA2.H12CORE.0.PSM.A_GATA2.H12CORE.0.PSM.A	Tmem41b	0.323	0.396	-0.073
chr7-109114530-109116326	-4.425	0	GATA2.H12CORE.1.P.B_GATA2.H12CORE.1.P.B	Tmem41b	0.323	0.396	-0.073
chr7-109114530-109116326	-4.425	0	GATA2.H12CORE.1.P.B_GATA2.H12CORE.1.P.B	Tmem41b	0.323	0.396	-0.073
chr7-109190630-109192251	-2.913	0.002	GATA2.H12CORE.0.PSM.A_GATA2.H12CORE.0.PSM.A	Tmem41b	0.323	0.396	-0.073
chr7-109190630-109192251	-2.913	0.002	GATA2.H12CORE.0.PSM.A_GATA2.H12CORE.0.PSM.A	Tmem41b	0.323	0.396	-0.073
chr4-109224475-109225927	-4.518	0	GATA2.H12CORE.0.PSM.A_GATA2.H12CORE.0.PSM.A	Eps15	0.317	0.39	-0.072
chr4-109224475-109225927	-4.518	0	GATA2.H12CORE.1.P.B_GATA2.H12CORE.1.P.B	Eps15	0.317	0.39	-0.072
chr4-109224475-109225927	-4.518	0	GATA2.H12CORE.0.PSM.A_GATA2.H12CORE.0.PSM.A	Eps15	0.317	0.39	-0.072
chr4-109224475-109225927	-4.518	0	GATA2.H12CORE.1.P.B_GATA2.H12CORE.1.P.B	Eps15	0.317	0.39	-0.072
chr5-114776222-114776466	-2.522	0.006	GATA2.H12CORE.0.PSM.A_GATA2.H12CORE.0.PSM.A	Sppl3	0.408	0.479	-0.071
chr5-114776222-114776466	-2.522	0.006	GATA2.H12CORE.0.PSM.A_GATA2.H12CORE.0.PSM.A	Sppl3	0.408	0.479	-0.071
chr10-60193379-60195507	5.653	0	GATA2.H12CORE.1.P.B_GATA2.H12CORE.1.P.B	Ddit4	0.397	0.468	-0.07
chr10-60193379-60195507	5.653	0	GATA2.H12CORE.1.P.B_GATA2.H12CORE.1.P.B	Ddit4	0.397	0.468	-0.07
chr7-30532717-30533299	-2.373	0.009	GATA2.H12CORE.0.PSM.A_GATA2.H12CORE.0.PSM.A	Zfp30	0.449	0.519	-0.07
chr7-30532717-30533299	-2.373	0.009	GATA2.H12CORE.0.PSM.A_GATA2.H12CORE.0.PSM.A	Zfp30	0.449	0.519	-0.07
chr2-26500037-26501126	-4.296	0	GATA2.H12CORE.1.P.B_GATA2.H12CORE.1.P.B	Bmyc	0.553	0.622	-0.07
chr11-87759957-87761030	2.396	0.008	GATA2.H12CORE.0.PSM.A_GATA2.H12CORE.0.PSM.A	Mtmr4	0.286	0.356	-0.069
chr11-87759957-87761030	2.396	0.008	GATA2.H12CORE.0.PSM.A_GATA2.H12CORE.0.PSM.A	Mtmr4	0.286	0.356	-0.069
chr11-116660970-116662402	2.963	0.002	GATA2.H12CORE.1.P.B_GATA2.H12CORE.1.P.B	Prpsap1	0.721	0.787	-0.066
chr11-116660970-116662402	2.963	0.002	GATA2.H12CORE.1.P.B_GATA2.H12CORE.1.P.B	Prpsap1	0.721	0.787	-0.066
chr2-26500037-26501126	-3.581	0	GATA2.H12CORE.1.P.B_GATA2.H12CORE.1.P.B	Fam69b	0.843	0.908	-0.065
chr2-26500037-26501126	-3.581	0	GATA2.H12CORE.1.P.B_GATA2.H12CORE.1.P.B	Fam69b	0.843	0.908	-0.065
chr1-75445085-75447030	2.468	0.007	GATA2.H12CORE.0.PSM.A_GATA2.H12CORE.0.PSM.A	Dnpep	0.825	0.89	-0.064
chr1-75445085-75447030	2.468	0.007	GATA2.H12CORE.1.P.B_GATA2.H12CORE.1.P.B	Dnpep	0.825	0.89	-0.064
chr1-75445085-75447030	2.468	0.007	GATA2.H12CORE.0.PSM.A_GATA2.H12CORE.0.PSM.A	Dnpep	0.825	0.89	-0.064
chr1-75445085-75447030	2.468	0.007	GATA2.H12CORE.1.P.B_GATA2.H12CORE.1.P.B	Dnpep	0.825	0.89	-0.064
chr5-114590119-114591611	3.045	0.001	GATA2.H12CORE.0.PSM.A_GATA2.H12CORE.0.PSM.A	Git2	0.269	0.333	-0.064
chr5-114590119-114591611	3.045	0.001	GATA2.H12CORE.0.PSM.A_GATA2.H12CORE.0.PSM.A	Git2	0.269	0.333	-0.064
chr5-114590119-114591611	3.045	0.001	GATA2.H12CORE.0.PSM.A_GATA2.H12CORE.0.PSM.A	Git2	0.269	0.333	-0.064
chr5-114590119-114591611	3.045	0.001	GATA2.H12CORE.1.P.B_GATA2.H12CORE.1.P.B	Git2	0.269	0.333	-0.064
chr5-114590119-114591611	3.045	0.001	GATA2.H12CORE.1.P.B_GATA2.H12CORE.1.P.B	Git2	0.269	0.333	-0.064
chr5-114590119-114591611	3.045	0.001	GATA2.H12CORE.1.P.B_GATA2.H12CORE.1.P.B	Git2	0.269	0.333	-0.064
chr5-114590119-114591611	3.045	0.001	GATA2.H12CORE.0.PSM.A_GATA2.H12CORE.0.PSM.A	Git2	0.269	0.333	-0.064
chr5-114590119-114591611	3.045	0.001	GATA2.H12CORE.0.PSM.A_GATA2.H12CORE.0.PSM.A	Git2	0.269	0.333	-0.064
chr5-114590119-114591611	3.045	0.001	GATA2.H12CORE.0.PSM.A_GATA2.H12CORE.0.PSM.A	Git2	0.269	0.333	-0.064
chr5-114590119-114591611	3.045	0.001	GATA2.H12CORE.1.P.B_GATA2.H12CORE.1.P.B	Git2	0.269	0.333	-0.064
chr5-114590119-114591611	3.045	0.001	GATA2.H12CORE.1.P.B_GATA2.H12CORE.1.P.B	Git2	0.269	0.333	-0.064
chr5-114590119-114591611	3.045	0.001	GATA2.H12CORE.1.P.B_GATA2.H12CORE.1.P.B	Git2	0.269	0.333	-0.064
chr17-56367994-56368766	4.516	0	GATA2.H12CORE.0.PSM.A_GATA2.H12CORE.0.PSM.A	Ptprs	1.62	1.68	-0.061
chr17-56367994-56368766	4.516	0	GATA2.H12CORE.1.P.B_GATA2.H12CORE.1.P.B	Ptprs	1.62	1.68	-0.061
chr17-56367994-56368766	4.516	0	GATA2.H12CORE.0.PSM.A_GATA2.H12CORE.0.PSM.A	Ptprs	1.62	1.68	-0.061
chr17-56367994-56368766	4.516	0	GATA2.H12CORE.1.P.B_GATA2.H12CORE.1.P.B	Ptprs	1.62	1.68	-0.061
chr14-54430422-54433714	-3.002	0.001	GATA2.H12CORE.0.PSM.A_GATA2.H12CORE.0.PSM.A	Zfhx2	0.729	0.788	-0.059
chr14-54430422-54433714	-3.002	0.001	GATA2.H12CORE.1.P.B_GATA2.H12CORE.1.P.B	Zfhx2	0.729	0.788	-0.059
chr14-54430422-54433714	-3.002	0.001	GATA2.H12CORE.0.PSM.A_GATA2.H12CORE.0.PSM.A	Zfhx2	0.729	0.788	-0.059
chr14-54430422-54433714	-3.002	0.001	GATA2.H12CORE.1.P.B_GATA2.H12CORE.1.P.B	Zfhx2	0.729	0.788	-0.059
chr2-26500037-26501126	-4.115	0	GATA2.H12CORE.1.P.B_GATA2.H12CORE.1.P.B	Nsmf	0.226	0.285	-0.059
chr2-26500037-26501126	-4.115	0	GATA2.H12CORE.1.P.B_GATA2.H12CORE.1.P.B	Nsmf	0.226	0.285	-0.059
chr9-61110890-61112484	2.449	0.007	GATA2.H12CORE.0.PSM.A_GATA2.H12CORE.0.PSM.A	Lrrc49	0.534	0.593	-0.059
chr9-61110890-61112484	2.449	0.007	GATA2.H12CORE.0.PSM.A_GATA2.H12CORE.0.PSM.A	Lrrc49	0.534	0.593	-0.059
chr7-29168143-29170561	-2.403	0.008	GATA2.H12CORE.1.P.B_GATA2.H12CORE.1.P.B	Spint2	0.09	0.148	-0.059
chr7-29168143-29170561	-2.403	0.008	GATA2.H12CORE.1.P.B_GATA2.H12CORE.1.P.B	Spint2	0.09	0.148	-0.059
chr8-84729810-84732148	-5.095	0	GATA2.H12CORE.0.PSM.A_GATA2.H12CORE.0.PSM.A	Neto2	0.282	0.339	-0.057
chr8-84729810-84732148	-5.095	0	GATA2.H12CORE.1.P.B_GATA2.H12CORE.1.P.B	Neto2	0.282	0.339	-0.057
chr8-84729810-84732148	-5.095	0	GATA2.H12CORE.1.P.B_GATA2.H12CORE.1.P.B	Neto2	0.282	0.339	-0.057
chr8-84729810-84732148	-5.095	0	GATA2.H12CORE.0.PSM.A_GATA2.H12CORE.0.PSM.A	Neto2	0.282	0.339	-0.057
chr8-84729810-84732148	-5.095	0	GATA2.H12CORE.1.P.B_GATA2.H12CORE.1.P.B	Neto2	0.282	0.339	-0.057
chr8-84729810-84732148	-5.095	0	GATA2.H12CORE.1.P.B_GATA2.H12CORE.1.P.B	Neto2	0.282	0.339	-0.057
chr16-5536240-5537519	-3.867	0	GATA2.H12CORE.1.P.B_GATA2.H12CORE.1.P.B	Glis2	0.14	0.196	-0.056
chr16-5536240-5537519	-3.867	0	GATA2.H12CORE.1.P.B_GATA2.H12CORE.1.P.B	Glis2	0.14	0.196	-0.056
chr9-107369329-107370687	2.728	0.003	GATA2.H12CORE.0.PSM.A_GATA2.H12CORE.0.PSM.A	Tcta	0.271	0.327	-0.056
chr9-107369329-107370687	2.728	0.003	GATA2.H12CORE.1.P.B_GATA2.H12CORE.1.P.B	Tcta	0.271	0.327	-0.056
chr9-107369329-107370687	2.728	0.003	GATA2.H12CORE.0.PSM.A_GATA2.H12CORE.0.PSM.A	Tcta	0.271	0.327	-0.056
chr9-107369329-107370687	2.728	0.003	GATA2.H12CORE.1.P.B_GATA2.H12CORE.1.P.B	Tcta	0.271	0.327	-0.056
chr2-26500037-26501126	-3.163	0.001	GATA2.H12CORE.1.P.B_GATA2.H12CORE.1.P.B	Tmem141	0.178	0.234	-0.056
chr2-26500037-26501126	-3.163	0.001	GATA2.H12CORE.1.P.B_GATA2.H12CORE.1.P.B	Tmem141	0.178	0.234	-0.056
chr1-132738799-132739614	3.858	0	GATA2.H12CORE.1.P.B_GATA2.H12CORE.1.P.B	Nfasc	0.441	0.497	-0.056
chr1-132738799-132739614	3.858	0	GATA2.H12CORE.1.P.B_GATA2.H12CORE.1.P.B	Nfasc	0.441	0.497	-0.056
chr3-108432245-108434266	-5.483	0	GATA2.H12CORE.0.PSM.A_GATA2.H12CORE.0.PSM.A	Tmem167b	0.196	0.251	-0.055
chr3-108432245-108434266	-5.483	0	GATA2.H12CORE.1.P.B_GATA2.H12CORE.1.P.B	Tmem167b	0.196	0.251	-0.055
chr3-108432245-108434266	-5.483	0	GATA2.H12CORE.0.PSM.A_GATA2.H12CORE.0.PSM.A	Tmem167b	0.196	0.251	-0.055
chr3-108432245-108434266	-5.483	0	GATA2.H12CORE.1.P.B_GATA2.H12CORE.1.P.B	Tmem167b	0.196	0.251	-0.055
chr2-26500037-26501126	2.844	0.002	GATA2.H12CORE.1.P.B_GATA2.H12CORE.1.P.B	Dnlz	0.676	0.731	-0.054
chr2-26500037-26501126	2.844	0.002	GATA2.H12CORE.1.P.B_GATA2.H12CORE.1.P.B	Dnlz	0.676	0.731	-0.054
chr15-99636844-99638249	-2.376	0.009	GATA2.H12CORE.0.PSM.A_GATA2.H12CORE.0.PSM.A	Tmbim6	0.844	0.896	-0.052
chr15-99636844-99638249	-2.376	0.009	GATA2.H12CORE.1.P.B_GATA2.H12CORE.1.P.B	Tmbim6	0.844	0.896	-0.052
chr15-99636844-99638249	-2.376	0.009	GATA2.H12CORE.0.PSM.A_GATA2.H12CORE.0.PSM.A	Tmbim6	0.844	0.896	-0.052
chr15-99636844-99638249	-2.376	0.009	GATA2.H12CORE.1.P.B_GATA2.H12CORE.1.P.B	Tmbim6	0.844	0.896	-0.052
chr1-75445085-75447030	2.562	0.005	GATA2.H12CORE.0.PSM.A_GATA2.H12CORE.0.PSM.A	Cdk5r2	0.219	0.271	-0.052
chr1-75445085-75447030	2.562	0.005	GATA2.H12CORE.1.P.B_GATA2.H12CORE.1.P.B	Cdk5r2	0.219	0.271	-0.052
chr5-125151539-125152476	-2.642	0.004	GATA2.H12CORE.0.PSM.A_GATA2.H12CORE.0.PSM.A	Ccdc92	0.135	0.184	-0.05
chr5-125151539-125152476	-2.642	0.004	GATA2.H12CORE.1.P.B_GATA2.H12CORE.1.P.B	Ccdc92	0.135	0.184	-0.05
chr5-125151539-125152476	-2.642	0.004	GATA2.H12CORE.0.PSM.A_GATA2.H12CORE.0.PSM.A	Ccdc92	0.135	0.184	-0.05
chr5-125151539-125152476	-2.642	0.004	GATA2.H12CORE.1.P.B_GATA2.H12CORE.1.P.B	Ccdc92	0.135	0.184	-0.05
chr2-26500037-26501126	-3.098	0.001	GATA2.H12CORE.1.P.B_GATA2.H12CORE.1.P.B	Abca2	0.056	0.103	-0.048
chr2-26500037-26501126	-3.098	0.001	GATA2.H12CORE.1.P.B_GATA2.H12CORE.1.P.B	Abca2	0.056	0.103	-0.048
chr5-114590119-114591611	-4.852	0	GATA2.H12CORE.0.PSM.A_GATA2.H12CORE.0.PSM.A	Ssh1	0.128	0.175	-0.047
chr5-114590119-114591611	-4.852	0	GATA2.H12CORE.0.PSM.A_GATA2.H12CORE.0.PSM.A	Ssh1	0.128	0.175	-0.047
chr5-114590119-114591611	-4.852	0	GATA2.H12CORE.0.PSM.A_GATA2.H12CORE.0.PSM.A	Ssh1	0.128	0.175	-0.047
chr5-114590119-114591611	-4.852	0	GATA2.H12CORE.1.P.B_GATA2.H12CORE.1.P.B	Ssh1	0.128	0.175	-0.047
chr5-114590119-114591611	-4.852	0	GATA2.H12CORE.1.P.B_GATA2.H12CORE.1.P.B	Ssh1	0.128	0.175	-0.047
chr5-114590119-114591611	-4.852	0	GATA2.H12CORE.1.P.B_GATA2.H12CORE.1.P.B	Ssh1	0.128	0.175	-0.047
chr5-114590119-114591611	-4.852	0	GATA2.H12CORE.0.PSM.A_GATA2.H12CORE.0.PSM.A	Ssh1	0.128	0.175	-0.047
chr5-114590119-114591611	-4.852	0	GATA2.H12CORE.0.PSM.A_GATA2.H12CORE.0.PSM.A	Ssh1	0.128	0.175	-0.047
chr5-114590119-114591611	-4.852	0	GATA2.H12CORE.0.PSM.A_GATA2.H12CORE.0.PSM.A	Ssh1	0.128	0.175	-0.047
chr5-114590119-114591611	-4.852	0	GATA2.H12CORE.1.P.B_GATA2.H12CORE.1.P.B	Ssh1	0.128	0.175	-0.047
chr5-114590119-114591611	-4.852	0	GATA2.H12CORE.1.P.B_GATA2.H12CORE.1.P.B	Ssh1	0.128	0.175	-0.047
chr5-114590119-114591611	-4.852	0	GATA2.H12CORE.1.P.B_GATA2.H12CORE.1.P.B	Ssh1	0.128	0.175	-0.047
chr12-80061772-80063302	-3.652	0	GATA2.H12CORE.1.P.B_GATA2.H12CORE.1.P.B	Synj2bp	0.631	0.679	-0.047
chr12-80061772-80063302	-3.652	0	GATA2.H12CORE.1.P.B_GATA2.H12CORE.1.P.B	Synj2bp	0.631	0.679	-0.047
chr2-26500037-26501126	-3.561	0	GATA2.H12CORE.1.P.B_GATA2.H12CORE.1.P.B	Ubac1	0.405	0.451	-0.047
chr2-26500037-26501126	-3.561	0	GATA2.H12CORE.1.P.B_GATA2.H12CORE.1.P.B	Ubac1	0.405	0.451	-0.047
chr9-107369329-107370687	-2.846	0.002	GATA2.H12CORE.0.PSM.A_GATA2.H12CORE.0.PSM.A	Rhoa	1.304	1.35	-0.046
chr9-107369329-107370687	-2.846	0.002	GATA2.H12CORE.1.P.B_GATA2.H12CORE.1.P.B	Rhoa	1.304	1.35	-0.046
chr9-107369329-107370687	-2.846	0.002	GATA2.H12CORE.0.PSM.A_GATA2.H12CORE.0.PSM.A	Rhoa	1.304	1.35	-0.046
chr9-107369329-107370687	-2.846	0.002	GATA2.H12CORE.1.P.B_GATA2.H12CORE.1.P.B	Rhoa	1.304	1.35	-0.046
chr12-80061772-80063302	-2.982	0.001	GATA2.H12CORE.1.P.B_GATA2.H12CORE.1.P.B	Tmem229b	0.096	0.142	-0.046
chr12-80061772-80063302	-2.982	0.001	GATA2.H12CORE.1.P.B_GATA2.H12CORE.1.P.B	Tmem229b	0.096	0.142	-0.046
chr5-139535260-139537387	2.648	0.004	GATA2.H12CORE.0.PSM.A_GATA2.H12CORE.0.PSM.A	Get4	0.235	0.28	-0.045
chr5-139535260-139537387	2.648	0.004	GATA2.H12CORE.1.P.B_GATA2.H12CORE.1.P.B	Get4	0.235	0.28	-0.045
chr5-139535260-139537387	2.648	0.004	GATA2.H12CORE.1.P.B_GATA2.H12CORE.1.P.B	Get4	0.235	0.28	-0.045
chr5-139535260-139537387	2.648	0.004	GATA2.H12CORE.0.PSM.A_GATA2.H12CORE.0.PSM.A	Get4	0.235	0.28	-0.045
chr5-139535260-139537387	2.648	0.004	GATA2.H12CORE.1.P.B_GATA2.H12CORE.1.P.B	Get4	0.235	0.28	-0.045
chr5-139535260-139537387	2.648	0.004	GATA2.H12CORE.1.P.B_GATA2.H12CORE.1.P.B	Get4	0.235	0.28	-0.045
chr2-33615521-33617065	-2.86	0.002	GATA2.H12CORE.1.P.B_GATA2.H12CORE.1.P.B	Fpgs	0.021	0.065	-0.044
chr2-33615521-33617065	-2.86	0.002	GATA2.H12CORE.1.P.B_GATA2.H12CORE.1.P.B	Fpgs	0.021	0.065	-0.044
chr3-88531166-88533901	-2.582	0.005	GATA2.H12CORE.1.P.B_GATA2.H12CORE.1.P.B	Adar	0.195	0.237	-0.042
chr3-88531166-88533901	-2.582	0.005	GATA2.H12CORE.1.P.B_GATA2.H12CORE.1.P.B	Adar	0.195	0.237	-0.042
chr4-117644634-117647845	-3.171	0.001	GATA2.H12CORE.0.PSM.A_GATA2.H12CORE.0.PSM.A	Ppih	0.394	0.435	-0.041
chr4-117644634-117647845	-3.171	0.001	GATA2.H12CORE.1.P.B_GATA2.H12CORE.1.P.B	Ppih	0.394	0.435	-0.041
chr4-117644634-117647845	-3.171	0.001	GATA2.H12CORE.0.PSM.A_GATA2.H12CORE.0.PSM.A	Ppih	0.394	0.435	-0.041
chr4-117644634-117647845	-3.171	0.001	GATA2.H12CORE.1.P.B_GATA2.H12CORE.1.P.B	Ppih	0.394	0.435	-0.041
chr3-108432245-108434266	-7.257	0	GATA2.H12CORE.0.PSM.A_GATA2.H12CORE.0.PSM.A	Ntng1	0.032	0.073	-0.041
chr3-108432245-108434266	-7.257	0	GATA2.H12CORE.1.P.B_GATA2.H12CORE.1.P.B	Ntng1	0.032	0.073	-0.041
chr3-108432245-108434266	-7.257	0	GATA2.H12CORE.0.PSM.A_GATA2.H12CORE.0.PSM.A	Ntng1	0.032	0.073	-0.041
chr3-108432245-108434266	-7.257	0	GATA2.H12CORE.1.P.B_GATA2.H12CORE.1.P.B	Ntng1	0.032	0.073	-0.041
chr2-33615521-33617065	2.858	0.002	GATA2.H12CORE.1.P.B_GATA2.H12CORE.1.P.B	1110008P14Rik	0.611	0.652	-0.041
chr2-33615521-33617065	2.858	0.002	GATA2.H12CORE.1.P.B_GATA2.H12CORE.1.P.B	1110008P14Rik	0.611	0.652	-0.041
chr2-33615521-33617065	-2.829	0.002	GATA2.H12CORE.1.P.B_GATA2.H12CORE.1.P.B	Pomt1	0.073	0.114	-0.041
chr2-33615521-33617065	-2.829	0.002	GATA2.H12CORE.1.P.B_GATA2.H12CORE.1.P.B	Pomt1	0.073	0.114	-0.041
chr2-18055932-18057996	-2.588	0.005	GATA2.H12CORE.1.P.B_GATA2.H12CORE.1.P.B	Pip4k2a	0.17	0.211	-0.041
chr2-18055932-18057996	-2.588	0.005	GATA2.H12CORE.1.P.B_GATA2.H12CORE.1.P.B	Pip4k2a	0.17	0.211	-0.041
chr1-35941254-35942551	-5.722	0	GATA2.H12CORE.0.PSM.A_GATA2.H12CORE.0.PSM.A	Cnnm3	0.153	0.193	-0.04
chr1-35941254-35942551	-5.722	0	GATA2.H12CORE.1.P.B_GATA2.H12CORE.1.P.B	Cnnm3	0.153	0.193	-0.04
chr1-35941254-35942551	-5.722	0	GATA2.H12CORE.0.PSM.A_GATA2.H12CORE.0.PSM.A	Cnnm3	0.153	0.193	-0.04
chr1-35941254-35942551	-5.722	0	GATA2.H12CORE.1.P.B_GATA2.H12CORE.1.P.B	Cnnm3	0.153	0.193	-0.04
chr7-109190630-109192251	3.376	0	GATA2.H12CORE.0.PSM.A_GATA2.H12CORE.0.PSM.A	Taf10	1.295	1.334	-0.039
chr7-109190630-109192251	3.376	0	GATA2.H12CORE.0.PSM.A_GATA2.H12CORE.0.PSM.A	Taf10	1.295	1.334	-0.039
chr3-108432245-108434266	-4.742	0	GATA2.H12CORE.0.PSM.A_GATA2.H12CORE.0.PSM.A	AI504432	0.063	0.101	-0.039
chr3-108432245-108434266	-4.742	0	GATA2.H12CORE.1.P.B_GATA2.H12CORE.1.P.B	AI504432	0.063	0.101	-0.039
chr3-108432245-108434266	-4.742	0	GATA2.H12CORE.0.PSM.A_GATA2.H12CORE.0.PSM.A	AI504432	0.063	0.101	-0.039
chr3-108432245-108434266	-4.742	0	GATA2.H12CORE.1.P.B_GATA2.H12CORE.1.P.B	AI504432	0.063	0.101	-0.039
chr1-35941254-35942551	-3.734	0	GATA2.H12CORE.0.PSM.A_GATA2.H12CORE.0.PSM.A	Coa5	0.107	0.145	-0.038
chr1-35941254-35942551	-3.734	0	GATA2.H12CORE.1.P.B_GATA2.H12CORE.1.P.B	Coa5	0.107	0.145	-0.038
chr1-35941254-35942551	-3.734	0	GATA2.H12CORE.0.PSM.A_GATA2.H12CORE.0.PSM.A	Coa5	0.107	0.145	-0.038
chr1-35941254-35942551	-3.734	0	GATA2.H12CORE.1.P.B_GATA2.H12CORE.1.P.B	Coa5	0.107	0.145	-0.038
chr9-110244525-110246578	2.537	0.006	GATA2.H12CORE.1.P.B_GATA2.H12CORE.1.P.B	Cspg5	0.221	0.259	-0.038
chr9-110244525-110246578	2.537	0.006	GATA2.H12CORE.1.P.B_GATA2.H12CORE.1.P.B	Cspg5	0.221	0.259	-0.038
chr5-24343787-24345086	-2.621	0.004	GATA2.H12CORE.1.P.B_GATA2.H12CORE.1.P.B	1700096K18Rik	0.093	0.131	-0.038
chr7-30532717-30533299	2.557	0.005	GATA2.H12CORE.0.PSM.A_GATA2.H12CORE.0.PSM.A	Hnrnpl	1.423	1.461	-0.038
chr7-30532717-30533299	2.557	0.005	GATA2.H12CORE.0.PSM.A_GATA2.H12CORE.0.PSM.A	Hnrnpl	1.423	1.461	-0.038
chr2-26500037-26501126	3.802	0	GATA2.H12CORE.1.P.B_GATA2.H12CORE.1.P.B	Ssna1	1.017	1.055	-0.038
chr2-26500037-26501126	3.802	0	GATA2.H12CORE.1.P.B_GATA2.H12CORE.1.P.B	Ssna1	1.017	1.055	-0.038
chr15-77152355-77154161	-2.33	0.01	GATA2.H12CORE.0.PSM.A_GATA2.H12CORE.0.PSM.A	Ppp1r16a	0.088	0.125	-0.037
chr15-77152355-77154161	-2.33	0.01	GATA2.H12CORE.0.PSM.A_GATA2.H12CORE.0.PSM.A	Ppp1r16a	0.088	0.125	-0.037
chr2-165135628-165136993	-2.679	0.004	GATA2.H12CORE.0.PSM.A_GATA2.H12CORE.0.PSM.A	Snx21	0.048	0.085	-0.037
chr2-165135628-165136993	-2.679	0.004	GATA2.H12CORE.0.PSM.A_GATA2.H12CORE.0.PSM.A	Snx21	0.048	0.085	-0.037
chr5-139535260-139537387	2.636	0.004	GATA2.H12CORE.0.PSM.A_GATA2.H12CORE.0.PSM.A	Mad1l1	0.099	0.136	-0.037
chr5-139535260-139537387	2.636	0.004	GATA2.H12CORE.1.P.B_GATA2.H12CORE.1.P.B	Mad1l1	0.099	0.136	-0.037
chr5-139535260-139537387	2.636	0.004	GATA2.H12CORE.1.P.B_GATA2.H12CORE.1.P.B	Mad1l1	0.099	0.136	-0.037
chr5-139535260-139537387	2.636	0.004	GATA2.H12CORE.0.PSM.A_GATA2.H12CORE.0.PSM.A	Mad1l1	0.099	0.136	-0.037
chr5-139535260-139537387	2.636	0.004	GATA2.H12CORE.1.P.B_GATA2.H12CORE.1.P.B	Mad1l1	0.099	0.136	-0.037
chr5-139535260-139537387	2.636	0.004	GATA2.H12CORE.1.P.B_GATA2.H12CORE.1.P.B	Mad1l1	0.099	0.136	-0.037
chr2-26500037-26501126	3.489	0	GATA2.H12CORE.1.P.B_GATA2.H12CORE.1.P.B	Tprn	0.032	0.069	-0.037
chr2-26500037-26501126	3.489	0	GATA2.H12CORE.1.P.B_GATA2.H12CORE.1.P.B	Tprn	0.032	0.069	-0.037
chr18-35887369-35890083	2.532	0.006	GATA2.H12CORE.0.PSM.A_GATA2.H12CORE.0.PSM.A	Matr3	1.881	1.916	-0.035
chr18-35887369-35890083	2.532	0.006	GATA2.H12CORE.1.P.B_GATA2.H12CORE.1.P.B	Matr3	1.881	1.916	-0.035
chr18-35887369-35890083	2.532	0.006	GATA2.H12CORE.0.PSM.A_GATA2.H12CORE.0.PSM.A	Matr3	1.881	1.916	-0.035
chr18-35887369-35890083	2.532	0.006	GATA2.H12CORE.1.P.B_GATA2.H12CORE.1.P.B	Matr3	1.881	1.916	-0.035
chr5-24451219-24454007	2.512	0.006	GATA2.H12CORE.1.P.B_GATA2.H12CORE.1.P.B	Agap3	0.454	0.49	-0.035
chr5-24451219-24454007	2.512	0.006	GATA2.H12CORE.1.P.B_GATA2.H12CORE.1.P.B	Agap3	0.454	0.49	-0.035
chr9-107369329-107370687	-3.832	0	GATA2.H12CORE.0.PSM.A_GATA2.H12CORE.0.PSM.A	Tex264	0.181	0.217	-0.035
chr9-107369329-107370687	-3.832	0	GATA2.H12CORE.1.P.B_GATA2.H12CORE.1.P.B	Tex264	0.181	0.217	-0.035
chr9-107369329-107370687	-3.832	0	GATA2.H12CORE.0.PSM.A_GATA2.H12CORE.0.PSM.A	Tex264	0.181	0.217	-0.035
chr9-107369329-107370687	-3.832	0	GATA2.H12CORE.1.P.B_GATA2.H12CORE.1.P.B	Tex264	0.181	0.217	-0.035
chr1-35941254-35942551	2.893	0.002	GATA2.H12CORE.0.PSM.A_GATA2.H12CORE.0.PSM.A	Actr1b	0.455	0.49	-0.035
chr1-35941254-35942551	2.893	0.002	GATA2.H12CORE.1.P.B_GATA2.H12CORE.1.P.B	Actr1b	0.455	0.49	-0.035
chr1-35941254-35942551	2.893	0.002	GATA2.H12CORE.0.PSM.A_GATA2.H12CORE.0.PSM.A	Actr1b	0.455	0.49	-0.035
chr1-35941254-35942551	2.893	0.002	GATA2.H12CORE.1.P.B_GATA2.H12CORE.1.P.B	Actr1b	0.455	0.49	-0.035
chr5-117413262-117415199	2.636	0.004	GATA2.H12CORE.1.P.B_GATA2.H12CORE.1.P.B	Taok3	0.715	0.75	-0.034
chr5-117413262-117415199	2.636	0.004	GATA2.H12CORE.1.P.B_GATA2.H12CORE.1.P.B	Taok3	0.715	0.75	-0.034
chr9-107369329-107370687	-3.599	0	GATA2.H12CORE.0.PSM.A_GATA2.H12CORE.0.PSM.A	Dag1	0.175	0.209	-0.034
chr9-107369329-107370687	-3.599	0	GATA2.H12CORE.1.P.B_GATA2.H12CORE.1.P.B	Dag1	0.175	0.209	-0.034
chr9-107369329-107370687	-3.599	0	GATA2.H12CORE.0.PSM.A_GATA2.H12CORE.0.PSM.A	Dag1	0.175	0.209	-0.034
chr9-107369329-107370687	-3.599	0	GATA2.H12CORE.1.P.B_GATA2.H12CORE.1.P.B	Dag1	0.175	0.209	-0.034
chr9-107369329-107370687	2.537	0.006	GATA2.H12CORE.0.PSM.A_GATA2.H12CORE.0.PSM.A	Tusc2	0.61	0.644	-0.034
chr9-107369329-107370687	2.537	0.006	GATA2.H12CORE.1.P.B_GATA2.H12CORE.1.P.B	Tusc2	0.61	0.644	-0.034
chr9-107369329-107370687	2.537	0.006	GATA2.H12CORE.0.PSM.A_GATA2.H12CORE.0.PSM.A	Tusc2	0.61	0.644	-0.034
chr9-107369329-107370687	2.537	0.006	GATA2.H12CORE.1.P.B_GATA2.H12CORE.1.P.B	Tusc2	0.61	0.644	-0.034
chr9-44286882-44289140	-2.466	0.007	GATA2.H12CORE.1.P.B_GATA2.H12CORE.1.P.B	Hinfp	0.173	0.207	-0.034
chr9-44286882-44289140	-2.466	0.007	GATA2.H12CORE.1.P.B_GATA2.H12CORE.1.P.B	Hinfp	0.173	0.207	-0.034
chr2-18055932-18057996	-2.548	0.005	GATA2.H12CORE.1.P.B_GATA2.H12CORE.1.P.B	Commd3	1.219	1.253	-0.033
chr2-18055932-18057996	-2.548	0.005	GATA2.H12CORE.1.P.B_GATA2.H12CORE.1.P.B	Commd3	1.219	1.253	-0.033
chr7-49070857-49071644	-2.736	0.003	GATA2.H12CORE.1.P.B_GATA2.H12CORE.1.P.B	Dbx1	0.005	0.036	-0.031
chr7-49070857-49071644	-2.736	0.003	GATA2.H12CORE.1.P.B_GATA2.H12CORE.1.P.B	Dbx1	0.005	0.036	-0.031
chr6-88189264-88191083	-3.051	0.001	GATA2.H12CORE.0.PSM.A_GATA2.H12CORE.0.PSM.A	Tpra1	0.073	0.104	-0.031
chr6-88189264-88191083	-3.051	0.001	GATA2.H12CORE.0.PSM.A_GATA2.H12CORE.0.PSM.A	Tpra1	0.073	0.104	-0.031
chr6-88189264-88191083	-3.051	0.001	GATA2.H12CORE.0.PSM.A_GATA2.H12CORE.0.PSM.A	Tpra1	0.073	0.104	-0.031
chr6-88189264-88191083	-3.051	0.001	GATA2.H12CORE.1.P.B_GATA2.H12CORE.1.P.B	Tpra1	0.073	0.104	-0.031
chr6-88189264-88191083	-3.051	0.001	GATA2.H12CORE.1.P.B_GATA2.H12CORE.1.P.B	Tpra1	0.073	0.104	-0.031
chr6-88189264-88191083	-3.051	0.001	GATA2.H12CORE.1.P.B_GATA2.H12CORE.1.P.B	Tpra1	0.073	0.104	-0.031
chr6-88189264-88191083	-3.051	0.001	GATA2.H12CORE.1.P.B_GATA2.H12CORE.1.P.B	Tpra1	0.073	0.104	-0.031
chr6-88189264-88191083	-3.051	0.001	GATA2.H12CORE.1.P.B_GATA2.H12CORE.1.P.B	Tpra1	0.073	0.104	-0.031
chr6-88189264-88191083	-3.051	0.001	GATA2.H12CORE.0.PSM.A_GATA2.H12CORE.0.PSM.A	Tpra1	0.073	0.104	-0.031
chr6-88189264-88191083	-3.051	0.001	GATA2.H12CORE.0.PSM.A_GATA2.H12CORE.0.PSM.A	Tpra1	0.073	0.104	-0.031
chr6-88189264-88191083	-3.051	0.001	GATA2.H12CORE.0.PSM.A_GATA2.H12CORE.0.PSM.A	Tpra1	0.073	0.104	-0.031
chr6-88189264-88191083	-3.051	0.001	GATA2.H12CORE.1.P.B_GATA2.H12CORE.1.P.B	Tpra1	0.073	0.104	-0.031
chr6-88189264-88191083	-3.051	0.001	GATA2.H12CORE.1.P.B_GATA2.H12CORE.1.P.B	Tpra1	0.073	0.104	-0.031
chr6-88189264-88191083	-3.051	0.001	GATA2.H12CORE.1.P.B_GATA2.H12CORE.1.P.B	Tpra1	0.073	0.104	-0.031
chr6-88189264-88191083	-3.051	0.001	GATA2.H12CORE.1.P.B_GATA2.H12CORE.1.P.B	Tpra1	0.073	0.104	-0.031
chr6-88189264-88191083	-3.051	0.001	GATA2.H12CORE.1.P.B_GATA2.H12CORE.1.P.B	Tpra1	0.073	0.104	-0.031
chr2-152046976-152049497	-3.591	0	GATA2.H12CORE.0.PSM.A_GATA2.H12CORE.0.PSM.A	Nsfl1c	1.156	1.186	-0.031
chr2-152046976-152049497	-3.591	0	GATA2.H12CORE.1.P.B_GATA2.H12CORE.1.P.B	Nsfl1c	1.156	1.186	-0.031
chr2-152046976-152049497	-3.591	0	GATA2.H12CORE.0.PSM.A_GATA2.H12CORE.0.PSM.A	Nsfl1c	1.156	1.186	-0.031
chr2-152046976-152049497	-3.591	0	GATA2.H12CORE.1.P.B_GATA2.H12CORE.1.P.B	Nsfl1c	1.156	1.186	-0.031
chr6-124767831-124770009	-2.705	0.003	GATA2.H12CORE.0.PSM.A_GATA2.H12CORE.0.PSM.A	Cops7a	0.424	0.455	-0.03
chr6-124767831-124770009	-2.705	0.003	GATA2.H12CORE.1.P.B_GATA2.H12CORE.1.P.B	Cops7a	0.424	0.455	-0.03
chr6-124767831-124770009	-2.705	0.003	GATA2.H12CORE.0.PSM.A_GATA2.H12CORE.0.PSM.A	Cops7a	0.424	0.455	-0.03
chr6-124767831-124770009	-2.705	0.003	GATA2.H12CORE.1.P.B_GATA2.H12CORE.1.P.B	Cops7a	0.424	0.455	-0.03
chr16-37990318-37991452	2.655	0.004	GATA2.H12CORE.1.P.B_GATA2.H12CORE.1.P.B	Rabl3	0.225	0.255	-0.03
chr16-37990318-37991452	2.655	0.004	GATA2.H12CORE.1.P.B_GATA2.H12CORE.1.P.B	Rabl3	0.225	0.255	-0.03
chr16-5536240-5537519	-2.346	0.009	GATA2.H12CORE.1.P.B_GATA2.H12CORE.1.P.B	Tfap4	0.061	0.091	-0.03
chr16-5536240-5537519	-2.346	0.009	GATA2.H12CORE.1.P.B_GATA2.H12CORE.1.P.B	Tfap4	0.061	0.091	-0.03
chr4-53796712-53797800	-2.766	0.003	GATA2.H12CORE.0.PSM.A_GATA2.H12CORE.0.PSM.A	Slc44a1	0.004	0.034	-0.03
chr4-53796712-53797800	-2.766	0.003	GATA2.H12CORE.0.PSM.A_GATA2.H12CORE.0.PSM.A	Slc44a1	0.004	0.034	-0.03
chr4-53796712-53797800	-2.766	0.003	GATA2.H12CORE.1.P.B_GATA2.H12CORE.1.P.B	Slc44a1	0.004	0.034	-0.03
chr4-53796712-53797800	-2.766	0.003	GATA2.H12CORE.1.P.B_GATA2.H12CORE.1.P.B	Slc44a1	0.004	0.034	-0.03
chr4-53796712-53797800	-2.766	0.003	GATA2.H12CORE.0.PSM.A_GATA2.H12CORE.0.PSM.A	Slc44a1	0.004	0.034	-0.03
chr4-53796712-53797800	-2.766	0.003	GATA2.H12CORE.0.PSM.A_GATA2.H12CORE.0.PSM.A	Slc44a1	0.004	0.034	-0.03
chr4-53796712-53797800	-2.766	0.003	GATA2.H12CORE.1.P.B_GATA2.H12CORE.1.P.B	Slc44a1	0.004	0.034	-0.03
chr4-53796712-53797800	-2.766	0.003	GATA2.H12CORE.1.P.B_GATA2.H12CORE.1.P.B	Slc44a1	0.004	0.034	-0.03
chr1-35941254-35942551	-3.36	0	GATA2.H12CORE.0.PSM.A_GATA2.H12CORE.0.PSM.A	Unc50	0.545	0.575	-0.03
chr1-35941254-35942551	-3.36	0	GATA2.H12CORE.1.P.B_GATA2.H12CORE.1.P.B	Unc50	0.545	0.575	-0.03
chr1-35941254-35942551	-3.36	0	GATA2.H12CORE.0.PSM.A_GATA2.H12CORE.0.PSM.A	Unc50	0.545	0.575	-0.03
chr1-35941254-35942551	-3.36	0	GATA2.H12CORE.1.P.B_GATA2.H12CORE.1.P.B	Unc50	0.545	0.575	-0.03
chr5-139535260-139537387	2.639	0.004	GATA2.H12CORE.0.PSM.A_GATA2.H12CORE.0.PSM.A	Eif3b	0.536	0.566	-0.03
chr5-139535260-139537387	2.639	0.004	GATA2.H12CORE.1.P.B_GATA2.H12CORE.1.P.B	Eif3b	0.536	0.566	-0.03
chr5-139535260-139537387	2.639	0.004	GATA2.H12CORE.1.P.B_GATA2.H12CORE.1.P.B	Eif3b	0.536	0.566	-0.03
chr5-139535260-139537387	2.639	0.004	GATA2.H12CORE.0.PSM.A_GATA2.H12CORE.0.PSM.A	Eif3b	0.536	0.566	-0.03
chr5-139535260-139537387	2.639	0.004	GATA2.H12CORE.1.P.B_GATA2.H12CORE.1.P.B	Eif3b	0.536	0.566	-0.03
chr5-139535260-139537387	2.639	0.004	GATA2.H12CORE.1.P.B_GATA2.H12CORE.1.P.B	Eif3b	0.536	0.566	-0.03
chr8-84729810-84732148	-2.341	0.01	GATA2.H12CORE.0.PSM.A_GATA2.H12CORE.0.PSM.A	Ndufb7	2.052	2.082	-0.03
chr8-84729810-84732148	-2.341	0.01	GATA2.H12CORE.1.P.B_GATA2.H12CORE.1.P.B	Ndufb7	2.052	2.082	-0.03
chr8-84729810-84732148	-2.341	0.01	GATA2.H12CORE.1.P.B_GATA2.H12CORE.1.P.B	Ndufb7	2.052	2.082	-0.03
chr8-84729810-84732148	-2.341	0.01	GATA2.H12CORE.0.PSM.A_GATA2.H12CORE.0.PSM.A	Ndufb7	2.052	2.082	-0.03
chr8-84729810-84732148	-2.341	0.01	GATA2.H12CORE.1.P.B_GATA2.H12CORE.1.P.B	Ndufb7	2.052	2.082	-0.03
chr8-84729810-84732148	-2.341	0.01	GATA2.H12CORE.1.P.B_GATA2.H12CORE.1.P.B	Ndufb7	2.052	2.082	-0.03
chr7-49070857-49071644	-3.26	0.001	GATA2.H12CORE.1.P.B_GATA2.H12CORE.1.P.B	Zdhhc13	0.111	0.14	-0.03
chr7-49070857-49071644	-3.26	0.001	GATA2.H12CORE.1.P.B_GATA2.H12CORE.1.P.B	Zdhhc13	0.111	0.14	-0.03
chr1-75445085-75447030	3.425	0	GATA2.H12CORE.0.PSM.A_GATA2.H12CORE.0.PSM.A	Cnppd1	0.301	0.331	-0.029
chr1-75445085-75447030	3.425	0	GATA2.H12CORE.1.P.B_GATA2.H12CORE.1.P.B	Cnppd1	0.301	0.331	-0.029
chr1-75445085-75447030	3.425	0	GATA2.H12CORE.0.PSM.A_GATA2.H12CORE.0.PSM.A	Cnppd1	0.301	0.331	-0.029
chr1-75445085-75447030	3.425	0	GATA2.H12CORE.1.P.B_GATA2.H12CORE.1.P.B	Cnppd1	0.301	0.331	-0.029
chr1-75448932-75450868	3.037	0.001	GATA2.H12CORE.0.PSM.A_GATA2.H12CORE.0.PSM.A	Cnppd1	0.301	0.331	-0.029
chr1-75448932-75450868	3.037	0.001	GATA2.H12CORE.1.P.B_GATA2.H12CORE.1.P.B	Cnppd1	0.301	0.331	-0.029
chr1-75448932-75450868	3.037	0.001	GATA2.H12CORE.0.PSM.A_GATA2.H12CORE.0.PSM.A	Cnppd1	0.301	0.331	-0.029
chr1-75448932-75450868	3.037	0.001	GATA2.H12CORE.1.P.B_GATA2.H12CORE.1.P.B	Cnppd1	0.301	0.331	-0.029
chr17-47521284-47522324	2.656	0.004	GATA2.H12CORE.0.PSM.A_GATA2.H12CORE.0.PSM.A	Taf8	0.18	0.209	-0.029
chr17-47521284-47522324	2.656	0.004	GATA2.H12CORE.1.P.B_GATA2.H12CORE.1.P.B	Taf8	0.18	0.209	-0.029
chr17-47521284-47522324	2.656	0.004	GATA2.H12CORE.0.PSM.A_GATA2.H12CORE.0.PSM.A	Taf8	0.18	0.209	-0.029
chr17-47521284-47522324	2.656	0.004	GATA2.H12CORE.1.P.B_GATA2.H12CORE.1.P.B	Taf8	0.18	0.209	-0.029
chr1-35941254-35942551	-4.461	0	GATA2.H12CORE.0.PSM.A_GATA2.H12CORE.0.PSM.A	Kansl3	0.189	0.218	-0.028
chr1-35941254-35942551	-4.461	0	GATA2.H12CORE.1.P.B_GATA2.H12CORE.1.P.B	Kansl3	0.189	0.218	-0.028
chr1-35941254-35942551	-4.461	0	GATA2.H12CORE.0.PSM.A_GATA2.H12CORE.0.PSM.A	Kansl3	0.189	0.218	-0.028
chr1-35941254-35942551	-4.461	0	GATA2.H12CORE.1.P.B_GATA2.H12CORE.1.P.B	Kansl3	0.189	0.218	-0.028
chr2-26500037-26501126	3.948	0	GATA2.H12CORE.1.P.B_GATA2.H12CORE.1.P.B	Man1b1	0.155	0.184	-0.028
chr2-26500037-26501126	3.948	0	GATA2.H12CORE.1.P.B_GATA2.H12CORE.1.P.B	Man1b1	0.155	0.184	-0.028
chr8-84729810-84732148	-2.888	0.002	GATA2.H12CORE.0.PSM.A_GATA2.H12CORE.0.PSM.A	Vps35	0.61	0.637	-0.027
chr8-84729810-84732148	-2.888	0.002	GATA2.H12CORE.1.P.B_GATA2.H12CORE.1.P.B	Vps35	0.61	0.637	-0.027
chr8-84729810-84732148	-2.888	0.002	GATA2.H12CORE.1.P.B_GATA2.H12CORE.1.P.B	Vps35	0.61	0.637	-0.027
chr8-84729810-84732148	-2.888	0.002	GATA2.H12CORE.0.PSM.A_GATA2.H12CORE.0.PSM.A	Vps35	0.61	0.637	-0.027
chr8-84729810-84732148	-2.888	0.002	GATA2.H12CORE.1.P.B_GATA2.H12CORE.1.P.B	Vps35	0.61	0.637	-0.027
chr8-84729810-84732148	-2.888	0.002	GATA2.H12CORE.1.P.B_GATA2.H12CORE.1.P.B	Vps35	0.61	0.637	-0.027
chr14-64589189-64590464	-2.994	0.001	GATA2.H12CORE.0.PSM.A_GATA2.H12CORE.0.PSM.A	Zfp395	0.053	0.079	-0.026
chr14-64589189-64590464	-2.994	0.001	GATA2.H12CORE.0.PSM.A_GATA2.H12CORE.0.PSM.A	Zfp395	0.053	0.079	-0.026
chr5-117413262-117415199	2.443	0.007	GATA2.H12CORE.1.P.B_GATA2.H12CORE.1.P.B	Ksr2	0.137	0.162	-0.025
chr5-117413262-117415199	2.443	0.007	GATA2.H12CORE.1.P.B_GATA2.H12CORE.1.P.B	Ksr2	0.137	0.162	-0.025
chr2-26500037-26501126	2.361	0.009	GATA2.H12CORE.1.P.B_GATA2.H12CORE.1.P.B	Surf4	0.3	0.324	-0.024
chr2-26500037-26501126	2.361	0.009	GATA2.H12CORE.1.P.B_GATA2.H12CORE.1.P.B	Surf4	0.3	0.324	-0.024
chr17-24505977-24507557	3.128	0.001	GATA2.H12CORE.0.PSM.A_GATA2.H12CORE.0.PSM.A	Zfp13	0.217	0.241	-0.024
chr17-24505977-24507557	3.128	0.001	GATA2.H12CORE.1.P.B_GATA2.H12CORE.1.P.B	Zfp13	0.217	0.241	-0.024
chr17-24505977-24507557	3.128	0.001	GATA2.H12CORE.0.PSM.A_GATA2.H12CORE.0.PSM.A	Zfp13	0.217	0.241	-0.024
chr17-24505977-24507557	3.128	0.001	GATA2.H12CORE.1.P.B_GATA2.H12CORE.1.P.B	Zfp13	0.217	0.241	-0.024
chr11-120279311-120281135	4.691	0	GATA2.H12CORE.0.PSM.A_GATA2.H12CORE.0.PSM.A	Gm11772	0.041	0.065	-0.024
chr11-120279311-120281135	4.691	0	GATA2.H12CORE.1.P.B_GATA2.H12CORE.1.P.B	Gm11772	0.041	0.065	-0.024
chr11-102227380-102228571	-3.113	0.001	GATA2.H12CORE.0.PSM.A_GATA2.H12CORE.0.PSM.A	Mpp3	0.175	0.197	-0.022
chr11-102227380-102228571	-3.113	0.001	GATA2.H12CORE.1.P.B_GATA2.H12CORE.1.P.B	Mpp3	0.175	0.197	-0.022
chr11-102227380-102228571	-3.113	0.001	GATA2.H12CORE.0.PSM.A_GATA2.H12CORE.0.PSM.A	Mpp3	0.175	0.197	-0.022
chr11-102227380-102228571	-3.113	0.001	GATA2.H12CORE.1.P.B_GATA2.H12CORE.1.P.B	Mpp3	0.175	0.197	-0.022
chr10-60193379-60195507	4.475	0	GATA2.H12CORE.1.P.B_GATA2.H12CORE.1.P.B	Dnajb12	0.195	0.217	-0.022
chr10-60193379-60195507	4.475	0	GATA2.H12CORE.1.P.B_GATA2.H12CORE.1.P.B	Dnajb12	0.195	0.217	-0.022
chr17-56367994-56368766	2.37	0.009	GATA2.H12CORE.0.PSM.A_GATA2.H12CORE.0.PSM.A	Zfp959	0.232	0.254	-0.022
chr17-56367994-56368766	2.37	0.009	GATA2.H12CORE.1.P.B_GATA2.H12CORE.1.P.B	Zfp959	0.232	0.254	-0.022
chr17-56367994-56368766	2.37	0.009	GATA2.H12CORE.0.PSM.A_GATA2.H12CORE.0.PSM.A	Zfp959	0.232	0.254	-0.022
chr17-56367994-56368766	2.37	0.009	GATA2.H12CORE.1.P.B_GATA2.H12CORE.1.P.B	Zfp959	0.232	0.254	-0.022
chr17-56896196-56897222	2.694	0.004	GATA2.H12CORE.0.PSM.A_GATA2.H12CORE.0.PSM.A	Zfp959	0.232	0.254	-0.022
chr17-56896196-56897222	2.694	0.004	GATA2.H12CORE.0.PSM.A_GATA2.H12CORE.0.PSM.A	Zfp959	0.232	0.254	-0.022
chr11-116660970-116662402	2.489	0.006	GATA2.H12CORE.1.P.B_GATA2.H12CORE.1.P.B	Foxj1	0.008	0.03	-0.022
chr11-116660970-116662402	2.489	0.006	GATA2.H12CORE.1.P.B_GATA2.H12CORE.1.P.B	Foxj1	0.008	0.03	-0.022
chr6-88189264-88191083	-2.643	0.004	GATA2.H12CORE.0.PSM.A_GATA2.H12CORE.0.PSM.A	Rpn1	0.385	0.407	-0.022
chr6-88189264-88191083	-2.643	0.004	GATA2.H12CORE.0.PSM.A_GATA2.H12CORE.0.PSM.A	Rpn1	0.385	0.407	-0.022
chr6-88189264-88191083	-2.643	0.004	GATA2.H12CORE.0.PSM.A_GATA2.H12CORE.0.PSM.A	Rpn1	0.385	0.407	-0.022
chr6-88189264-88191083	-2.643	0.004	GATA2.H12CORE.1.P.B_GATA2.H12CORE.1.P.B	Rpn1	0.385	0.407	-0.022
chr6-88189264-88191083	-2.643	0.004	GATA2.H12CORE.1.P.B_GATA2.H12CORE.1.P.B	Rpn1	0.385	0.407	-0.022
chr6-88189264-88191083	-2.643	0.004	GATA2.H12CORE.1.P.B_GATA2.H12CORE.1.P.B	Rpn1	0.385	0.407	-0.022
chr6-88189264-88191083	-2.643	0.004	GATA2.H12CORE.1.P.B_GATA2.H12CORE.1.P.B	Rpn1	0.385	0.407	-0.022
chr6-88189264-88191083	-2.643	0.004	GATA2.H12CORE.1.P.B_GATA2.H12CORE.1.P.B	Rpn1	0.385	0.407	-0.022
chr6-88189264-88191083	-2.643	0.004	GATA2.H12CORE.0.PSM.A_GATA2.H12CORE.0.PSM.A	Rpn1	0.385	0.407	-0.022
chr6-88189264-88191083	-2.643	0.004	GATA2.H12CORE.0.PSM.A_GATA2.H12CORE.0.PSM.A	Rpn1	0.385	0.407	-0.022
chr6-88189264-88191083	-2.643	0.004	GATA2.H12CORE.0.PSM.A_GATA2.H12CORE.0.PSM.A	Rpn1	0.385	0.407	-0.022
chr6-88189264-88191083	-2.643	0.004	GATA2.H12CORE.1.P.B_GATA2.H12CORE.1.P.B	Rpn1	0.385	0.407	-0.022
chr6-88189264-88191083	-2.643	0.004	GATA2.H12CORE.1.P.B_GATA2.H12CORE.1.P.B	Rpn1	0.385	0.407	-0.022
chr6-88189264-88191083	-2.643	0.004	GATA2.H12CORE.1.P.B_GATA2.H12CORE.1.P.B	Rpn1	0.385	0.407	-0.022
chr6-88189264-88191083	-2.643	0.004	GATA2.H12CORE.1.P.B_GATA2.H12CORE.1.P.B	Rpn1	0.385	0.407	-0.022
chr6-88189264-88191083	-2.643	0.004	GATA2.H12CORE.1.P.B_GATA2.H12CORE.1.P.B	Rpn1	0.385	0.407	-0.022
chr3-88531166-88533901	3.058	0.001	GATA2.H12CORE.1.P.B_GATA2.H12CORE.1.P.B	1700113A16Rik	0.021	0.042	-0.022
chr3-88531166-88533901	3.058	0.001	GATA2.H12CORE.1.P.B_GATA2.H12CORE.1.P.B	1700113A16Rik	0.021	0.042	-0.022
chr3-108432245-108434266	5.242	0	GATA2.H12CORE.0.PSM.A_GATA2.H12CORE.0.PSM.A	Psma5	1.699	1.72	-0.021
chr3-108432245-108434266	5.242	0	GATA2.H12CORE.1.P.B_GATA2.H12CORE.1.P.B	Psma5	1.699	1.72	-0.021
chr3-108432245-108434266	5.242	0	GATA2.H12CORE.0.PSM.A_GATA2.H12CORE.0.PSM.A	Psma5	1.699	1.72	-0.021
chr3-108432245-108434266	5.242	0	GATA2.H12CORE.1.P.B_GATA2.H12CORE.1.P.B	Psma5	1.699	1.72	-0.021
chr2-122365914-122367297	2.538	0.006	GATA2.H12CORE.1.P.B_GATA2.H12CORE.1.P.B	Cdan1	0.062	0.083	-0.021
chr2-122365914-122367297	2.538	0.006	GATA2.H12CORE.1.P.B_GATA2.H12CORE.1.P.B	Cdan1	0.062	0.083	-0.021
chr2-33615521-33617065	5.601	0	GATA2.H12CORE.1.P.B_GATA2.H12CORE.1.P.B	Gm13404	0.013	0.034	-0.021
chr2-33615521-33617065	5.601	0	GATA2.H12CORE.1.P.B_GATA2.H12CORE.1.P.B	Gm13404	0.013	0.034	-0.021
chr8-84729810-84732148	-2.349	0.009	GATA2.H12CORE.0.PSM.A_GATA2.H12CORE.0.PSM.A	Tbc1d9	0.144	0.165	-0.021
chr8-84729810-84732148	-2.349	0.009	GATA2.H12CORE.1.P.B_GATA2.H12CORE.1.P.B	Tbc1d9	0.144	0.165	-0.021
chr8-84729810-84732148	-2.349	0.009	GATA2.H12CORE.1.P.B_GATA2.H12CORE.1.P.B	Tbc1d9	0.144	0.165	-0.021
chr8-84729810-84732148	-2.349	0.009	GATA2.H12CORE.0.PSM.A_GATA2.H12CORE.0.PSM.A	Tbc1d9	0.144	0.165	-0.021
chr8-84729810-84732148	-2.349	0.009	GATA2.H12CORE.1.P.B_GATA2.H12CORE.1.P.B	Tbc1d9	0.144	0.165	-0.021
chr8-84729810-84732148	-2.349	0.009	GATA2.H12CORE.1.P.B_GATA2.H12CORE.1.P.B	Tbc1d9	0.144	0.165	-0.021
chr13-72298052-72299252	2.557	0.005	GATA2.H12CORE.0.PSM.A_GATA2.H12CORE.0.PSM.A	Ftl1-ps1	0.359	0.379	-0.02
chr13-72298052-72299252	2.557	0.005	GATA2.H12CORE.0.PSM.A_GATA2.H12CORE.0.PSM.A	Ftl1-ps1	0.359	0.379	-0.02
chr13-72298052-72299252	2.557	0.005	GATA2.H12CORE.1.P.B_GATA2.H12CORE.1.P.B	Ftl1-ps1	0.359	0.379	-0.02
chr13-72298052-72299252	2.557	0.005	GATA2.H12CORE.1.P.B_GATA2.H12CORE.1.P.B	Ftl1-ps1	0.359	0.379	-0.02
chr17-34591473-34593464	2.996	0.001	GATA2.H12CORE.1.P.B_GATA2.H12CORE.1.P.B	Slc39a7	0.658	0.678	-0.02
chr17-34591473-34593464	2.996	0.001	GATA2.H12CORE.1.P.B_GATA2.H12CORE.1.P.B	Slc39a7	0.658	0.678	-0.02
chr2-26500037-26501126	3.522	0	GATA2.H12CORE.1.P.B_GATA2.H12CORE.1.P.B	Rabl6	0.565	0.585	-0.019
chr2-26500037-26501126	3.522	0	GATA2.H12CORE.1.P.B_GATA2.H12CORE.1.P.B	Rabl6	0.565	0.585	-0.019
chr14-54430422-54433714	2.614	0.004	GATA2.H12CORE.0.PSM.A_GATA2.H12CORE.0.PSM.A	Khnyn	0.047	0.065	-0.019
chr14-54430422-54433714	2.614	0.004	GATA2.H12CORE.1.P.B_GATA2.H12CORE.1.P.B	Khnyn	0.047	0.065	-0.019
chr14-54430422-54433714	2.614	0.004	GATA2.H12CORE.0.PSM.A_GATA2.H12CORE.0.PSM.A	Khnyn	0.047	0.065	-0.019
chr14-54430422-54433714	2.614	0.004	GATA2.H12CORE.1.P.B_GATA2.H12CORE.1.P.B	Khnyn	0.047	0.065	-0.019
chr2-152046976-152049497	3.364	0	GATA2.H12CORE.0.PSM.A_GATA2.H12CORE.0.PSM.A	Fam110a	0.624	0.643	-0.018
chr2-152046976-152049497	3.364	0	GATA2.H12CORE.1.P.B_GATA2.H12CORE.1.P.B	Fam110a	0.624	0.643	-0.018
chr2-152046976-152049497	3.364	0	GATA2.H12CORE.0.PSM.A_GATA2.H12CORE.0.PSM.A	Fam110a	0.624	0.643	-0.018
chr2-152046976-152049497	3.364	0	GATA2.H12CORE.1.P.B_GATA2.H12CORE.1.P.B	Fam110a	0.624	0.643	-0.018
chr2-33615521-33617065	3.264	0.001	GATA2.H12CORE.1.P.B_GATA2.H12CORE.1.P.B	Lmx1b	0.008	0.027	-0.018
chr2-33615521-33617065	3.264	0.001	GATA2.H12CORE.1.P.B_GATA2.H12CORE.1.P.B	Lmx1b	0.008	0.027	-0.018
chr15-99636844-99638249	2.775	0.003	GATA2.H12CORE.0.PSM.A_GATA2.H12CORE.0.PSM.A	Dip2b	0.527	0.545	-0.018
chr15-99636844-99638249	2.775	0.003	GATA2.H12CORE.1.P.B_GATA2.H12CORE.1.P.B	Dip2b	0.527	0.545	-0.018
chr15-99636844-99638249	2.775	0.003	GATA2.H12CORE.0.PSM.A_GATA2.H12CORE.0.PSM.A	Dip2b	0.527	0.545	-0.018
chr15-99636844-99638249	2.775	0.003	GATA2.H12CORE.1.P.B_GATA2.H12CORE.1.P.B	Dip2b	0.527	0.545	-0.018
chr1-35941254-35942551	-2.349	0.009	GATA2.H12CORE.0.PSM.A_GATA2.H12CORE.0.PSM.A	Prim2	0.142	0.16	-0.018
chr1-35941254-35942551	-2.349	0.009	GATA2.H12CORE.1.P.B_GATA2.H12CORE.1.P.B	Prim2	0.142	0.16	-0.018
chr1-35941254-35942551	-2.349	0.009	GATA2.H12CORE.0.PSM.A_GATA2.H12CORE.0.PSM.A	Prim2	0.142	0.16	-0.018
chr1-35941254-35942551	-2.349	0.009	GATA2.H12CORE.1.P.B_GATA2.H12CORE.1.P.B	Prim2	0.142	0.16	-0.018
chr2-33615521-33617065	-2.985	0.001	GATA2.H12CORE.1.P.B_GATA2.H12CORE.1.P.B	St6galnac6	0.019	0.037	-0.018
chr2-33615521-33617065	-2.985	0.001	GATA2.H12CORE.1.P.B_GATA2.H12CORE.1.P.B	St6galnac6	0.019	0.037	-0.018
chr2-33615521-33617065	-3.548	0	GATA2.H12CORE.1.P.B_GATA2.H12CORE.1.P.B	Aif1l	0.023	0.042	-0.018
chr2-33615521-33617065	-3.548	0	GATA2.H12CORE.1.P.B_GATA2.H12CORE.1.P.B	Aif1l	0.023	0.042	-0.018
chr12-80061772-80063302	-3.907	0	GATA2.H12CORE.1.P.B_GATA2.H12CORE.1.P.B	Dcaf5	0.234	0.252	-0.018
chr12-80061772-80063302	-3.907	0	GATA2.H12CORE.1.P.B_GATA2.H12CORE.1.P.B	Dcaf5	0.234	0.252	-0.018
chr2-26500037-26501126	3.324	0	GATA2.H12CORE.1.P.B_GATA2.H12CORE.1.P.B	Lhx3	0	0.018	-0.018
chr2-26500037-26501126	3.324	0	GATA2.H12CORE.1.P.B_GATA2.H12CORE.1.P.B	Lhx3	0	0.018	-0.018
chr7-105810334-105811483	-2.612	0.005	GATA2.H12CORE.1.P.B_GATA2.H12CORE.1.P.B	Olfr482	0.036	0.053	-0.017
chr7-109114530-109116326	-3.532	0	GATA2.H12CORE.0.PSM.A_GATA2.H12CORE.0.PSM.A	Olfr482	0.036	0.053	-0.017
chr7-109114530-109116326	-3.532	0	GATA2.H12CORE.1.P.B_GATA2.H12CORE.1.P.B	Olfr482	0.036	0.053	-0.017
chr7-109114530-109116326	-3.532	0	GATA2.H12CORE.1.P.B_GATA2.H12CORE.1.P.B	Olfr482	0.036	0.053	-0.017
chr2-26500037-26501126	2.504	0.006	GATA2.H12CORE.1.P.B_GATA2.H12CORE.1.P.B	Tmem203	0.112	0.129	-0.017
chr12-80061772-80063302	3.116	0.001	GATA2.H12CORE.1.P.B_GATA2.H12CORE.1.P.B	Susd6	0.146	0.162	-0.017
chr12-80061772-80063302	3.116	0.001	GATA2.H12CORE.1.P.B_GATA2.H12CORE.1.P.B	Susd6	0.146	0.162	-0.017
chr5-31082378-31084563	2.681	0.004	GATA2.H12CORE.0.PSM.A_GATA2.H12CORE.0.PSM.A	Slc4a1ap	0.24	0.256	-0.016
chr5-31082378-31084563	2.681	0.004	GATA2.H12CORE.0.PSM.A_GATA2.H12CORE.0.PSM.A	Slc4a1ap	0.24	0.256	-0.016
chr5-31086447-31087076	2.739	0.003	GATA2.H12CORE.1.P.B_GATA2.H12CORE.1.P.B	Slc4a1ap	0.24	0.256	-0.016
chr5-31086447-31087076	2.739	0.003	GATA2.H12CORE.1.P.B_GATA2.H12CORE.1.P.B	Slc4a1ap	0.24	0.256	-0.016
chr2-29039946-29041718	3.835	0	GATA2.H12CORE.0.PSM.A_GATA2.H12CORE.0.PSM.A	Med27	0.567	0.583	-0.016
chr2-29039946-29041718	3.835	0	GATA2.H12CORE.0.PSM.A_GATA2.H12CORE.0.PSM.A	Med27	0.567	0.583	-0.016
chr2-26500037-26501126	-4.35	0	GATA2.H12CORE.1.P.B_GATA2.H12CORE.1.P.B	Gm996	0.001	0.017	-0.016
chr2-26500037-26501126	-4.35	0	GATA2.H12CORE.1.P.B_GATA2.H12CORE.1.P.B	Gm996	0.001	0.017	-0.016
chr9-57505347-57506328	-2.489	0.006	GATA2.H12CORE.0.PSM.A_GATA2.H12CORE.0.PSM.A	Ppcdc	0.101	0.116	-0.015
chr9-57505347-57506328	-2.489	0.006	GATA2.H12CORE.1.P.B_GATA2.H12CORE.1.P.B	Ppcdc	0.101	0.116	-0.015
chr9-57505347-57506328	-2.489	0.006	GATA2.H12CORE.0.PSM.A_GATA2.H12CORE.0.PSM.A	Ppcdc	0.101	0.116	-0.015
chr9-57505347-57506328	-2.489	0.006	GATA2.H12CORE.1.P.B_GATA2.H12CORE.1.P.B	Ppcdc	0.101	0.116	-0.015
chr2-26500037-26501126	-3.354	0	GATA2.H12CORE.1.P.B_GATA2.H12CORE.1.P.B	Edf1	1.946	1.961	-0.015
chr2-26500037-26501126	-3.354	0	GATA2.H12CORE.1.P.B_GATA2.H12CORE.1.P.B	Edf1	1.946	1.961	-0.015
chr8-122719602-122721611	2.575	0.005	GATA2.H12CORE.0.PSM.A_GATA2.H12CORE.0.PSM.A	Cdh15	0.01	0.025	-0.015
chr8-122719602-122721611	2.575	0.005	GATA2.H12CORE.1.P.B_GATA2.H12CORE.1.P.B	Cdh15	0.01	0.025	-0.015
chr8-122719602-122721611	2.575	0.005	GATA2.H12CORE.1.P.B_GATA2.H12CORE.1.P.B	Cdh15	0.01	0.025	-0.015
chr8-122719602-122721611	2.575	0.005	GATA2.H12CORE.0.PSM.A_GATA2.H12CORE.0.PSM.A	Cdh15	0.01	0.025	-0.015
chr8-122719602-122721611	2.575	0.005	GATA2.H12CORE.1.P.B_GATA2.H12CORE.1.P.B	Cdh15	0.01	0.025	-0.015
chr8-122719602-122721611	2.575	0.005	GATA2.H12CORE.1.P.B_GATA2.H12CORE.1.P.B	Cdh15	0.01	0.025	-0.015
chr13-72298052-72299252	3.21	0.001	GATA2.H12CORE.0.PSM.A_GATA2.H12CORE.0.PSM.A	Zfp825	0.152	0.167	-0.015
chr13-72298052-72299252	3.21	0.001	GATA2.H12CORE.0.PSM.A_GATA2.H12CORE.0.PSM.A	Zfp825	0.152	0.167	-0.015
chr13-72298052-72299252	3.21	0.001	GATA2.H12CORE.1.P.B_GATA2.H12CORE.1.P.B	Zfp825	0.152	0.167	-0.015
chr13-72298052-72299252	3.21	0.001	GATA2.H12CORE.1.P.B_GATA2.H12CORE.1.P.B	Zfp825	0.152	0.167	-0.015
chr13-72298052-72299252	3.21	0.001	GATA2.H12CORE.0.PSM.A_GATA2.H12CORE.0.PSM.A	Zfp825	0.152	0.167	-0.015
chr13-72298052-72299252	3.21	0.001	GATA2.H12CORE.0.PSM.A_GATA2.H12CORE.0.PSM.A	Zfp825	0.152	0.167	-0.015
chr13-72298052-72299252	3.21	0.001	GATA2.H12CORE.1.P.B_GATA2.H12CORE.1.P.B	Zfp825	0.152	0.167	-0.015
chr13-72298052-72299252	3.21	0.001	GATA2.H12CORE.1.P.B_GATA2.H12CORE.1.P.B	Zfp825	0.152	0.167	-0.015
chr12-80061772-80063302	-3.045	0.001	GATA2.H12CORE.1.P.B_GATA2.H12CORE.1.P.B	Gm4787	0.002	0.017	-0.015
chr16-33605399-33607413	4.339	0	GATA2.H12CORE.0.PSM.A_GATA2.H12CORE.0.PSM.A	Umps	0.111	0.126	-0.015
chr16-33605399-33607413	4.339	0	GATA2.H12CORE.0.PSM.A_GATA2.H12CORE.0.PSM.A	Umps	0.111	0.126	-0.015
chr11-102227380-102228571	-3.584	0	GATA2.H12CORE.0.PSM.A_GATA2.H12CORE.0.PSM.A	Rundc3a	1.252	1.267	-0.015
chr11-102227380-102228571	-3.584	0	GATA2.H12CORE.1.P.B_GATA2.H12CORE.1.P.B	Rundc3a	1.252	1.267	-0.015
chr11-102227380-102228571	-3.584	0	GATA2.H12CORE.0.PSM.A_GATA2.H12CORE.0.PSM.A	Rundc3a	1.252	1.267	-0.015
chr11-102227380-102228571	-3.584	0	GATA2.H12CORE.1.P.B_GATA2.H12CORE.1.P.B	Rundc3a	1.252	1.267	-0.015
chr12-54286666-54289024	-2.673	0.004	GATA2.H12CORE.1.P.B_GATA2.H12CORE.1.P.B	Eapp	0.911	0.926	-0.014
chr12-54286666-54289024	-2.673	0.004	GATA2.H12CORE.1.P.B_GATA2.H12CORE.1.P.B	Eapp	0.911	0.926	-0.014
chr11-120279311-120281135	2.45	0.007	GATA2.H12CORE.0.PSM.A_GATA2.H12CORE.0.PSM.A	Mafg	0.623	0.637	-0.014
chr11-120279311-120281135	2.45	0.007	GATA2.H12CORE.1.P.B_GATA2.H12CORE.1.P.B	Mafg	0.623	0.637	-0.014
chr11-120279311-120281135	2.45	0.007	GATA2.H12CORE.0.PSM.A_GATA2.H12CORE.0.PSM.A	Mafg	0.623	0.637	-0.014
chr11-120279311-120281135	2.45	0.007	GATA2.H12CORE.1.P.B_GATA2.H12CORE.1.P.B	Mafg	0.623	0.637	-0.014
chr14-54430422-54433714	-2.608	0.005	GATA2.H12CORE.0.PSM.A_GATA2.H12CORE.0.PSM.A	Zfhx2os	0.002	0.016	-0.014
chr14-54430422-54433714	-2.608	0.005	GATA2.H12CORE.1.P.B_GATA2.H12CORE.1.P.B	Zfhx2os	0.002	0.016	-0.014
chr10-60193379-60195507	-3.901	0	GATA2.H12CORE.1.P.B_GATA2.H12CORE.1.P.B	Slc29a3	0.062	0.076	-0.014
chr10-60193379-60195507	-3.901	0	GATA2.H12CORE.1.P.B_GATA2.H12CORE.1.P.B	Slc29a3	0.062	0.076	-0.014
chr12-80061772-80063302	-3.822	0	GATA2.H12CORE.1.P.B_GATA2.H12CORE.1.P.B	Gphn	0.4	0.413	-0.013
chr12-80061772-80063302	-3.822	0	GATA2.H12CORE.1.P.B_GATA2.H12CORE.1.P.B	Gphn	0.4	0.413	-0.013
chr4-117644634-117647845	-2.92	0.002	GATA2.H12CORE.0.PSM.A_GATA2.H12CORE.0.PSM.A	Elovl1	0.108	0.121	-0.013
chr4-117644634-117647845	-2.92	0.002	GATA2.H12CORE.1.P.B_GATA2.H12CORE.1.P.B	Elovl1	0.108	0.121	-0.013
chr4-117644634-117647845	-2.92	0.002	GATA2.H12CORE.0.PSM.A_GATA2.H12CORE.0.PSM.A	Elovl1	0.108	0.121	-0.013
chr4-117644634-117647845	-2.92	0.002	GATA2.H12CORE.1.P.B_GATA2.H12CORE.1.P.B	Elovl1	0.108	0.121	-0.013
chr5-139535260-139537387	3.439	0	GATA2.H12CORE.0.PSM.A_GATA2.H12CORE.0.PSM.A	Elfn1	0.007	0.02	-0.013
chr5-139535260-139537387	3.439	0	GATA2.H12CORE.1.P.B_GATA2.H12CORE.1.P.B	Elfn1	0.007	0.02	-0.013
chr5-139535260-139537387	3.439	0	GATA2.H12CORE.1.P.B_GATA2.H12CORE.1.P.B	Elfn1	0.007	0.02	-0.013
chr5-139535260-139537387	3.439	0	GATA2.H12CORE.0.PSM.A_GATA2.H12CORE.0.PSM.A	Elfn1	0.007	0.02	-0.013
chr5-139535260-139537387	3.439	0	GATA2.H12CORE.1.P.B_GATA2.H12CORE.1.P.B	Elfn1	0.007	0.02	-0.013
chr5-139535260-139537387	3.439	0	GATA2.H12CORE.1.P.B_GATA2.H12CORE.1.P.B	Elfn1	0.007	0.02	-0.013
chr2-132028350-132031017	2.382	0.009	GATA2.H12CORE.0.PSM.A_GATA2.H12CORE.0.PSM.A	Rassf2	0.039	0.052	-0.012
chr2-132028350-132031017	2.382	0.009	GATA2.H12CORE.0.PSM.A_GATA2.H12CORE.0.PSM.A	Rassf2	0.039	0.052	-0.012
chr12-112163716-112164983	-2.902	0.002	GATA2.H12CORE.0.PSM.A_GATA2.H12CORE.0.PSM.A	Tmem121	0.369	0.382	-0.012
chr12-112163716-112164983	-2.902	0.002	GATA2.H12CORE.0.PSM.A_GATA2.H12CORE.0.PSM.A	Tmem121	0.369	0.382	-0.012
chr12-112163716-112164983	-2.902	0.002	GATA2.H12CORE.1.P.B_GATA2.H12CORE.1.P.B	Tmem121	0.369	0.382	-0.012
chr12-112163716-112164983	-2.902	0.002	GATA2.H12CORE.0.PSM.A_GATA2.H12CORE.0.PSM.A	Tmem121	0.369	0.382	-0.012
chr12-112163716-112164983	-2.902	0.002	GATA2.H12CORE.0.PSM.A_GATA2.H12CORE.0.PSM.A	Tmem121	0.369	0.382	-0.012
chr12-112163716-112164983	-2.902	0.002	GATA2.H12CORE.1.P.B_GATA2.H12CORE.1.P.B	Tmem121	0.369	0.382	-0.012
chr4-115056171-115058012	-4.742	0	GATA2.H12CORE.0.PSM.A_GATA2.H12CORE.0.PSM.A	Trabd2b	0	0.013	-0.012
chr4-115056171-115058012	-4.742	0	GATA2.H12CORE.1.P.B_GATA2.H12CORE.1.P.B	Trabd2b	0	0.013	-0.012
chr4-115056171-115058012	-4.742	0	GATA2.H12CORE.0.PSM.A_GATA2.H12CORE.0.PSM.A	Trabd2b	0	0.013	-0.012
chr4-115056171-115058012	-4.742	0	GATA2.H12CORE.1.P.B_GATA2.H12CORE.1.P.B	Trabd2b	0	0.013	-0.012
chr18-35814237-35816482	-2.709	0.003	GATA2.H12CORE.0.PSM.A_GATA2.H12CORE.0.PSM.A	Dnajc18	0.264	0.276	-0.012
chr18-35814237-35816482	-2.709	0.003	GATA2.H12CORE.1.P.B_GATA2.H12CORE.1.P.B	Dnajc18	0.264	0.276	-0.012
chr18-35814237-35816482	-2.709	0.003	GATA2.H12CORE.1.P.B_GATA2.H12CORE.1.P.B	Dnajc18	0.264	0.276	-0.012
chr18-35814237-35816482	-2.709	0.003	GATA2.H12CORE.0.PSM.A_GATA2.H12CORE.0.PSM.A	Dnajc18	0.264	0.276	-0.012
chr18-35814237-35816482	-2.709	0.003	GATA2.H12CORE.1.P.B_GATA2.H12CORE.1.P.B	Dnajc18	0.264	0.276	-0.012
chr18-35814237-35816482	-2.709	0.003	GATA2.H12CORE.1.P.B_GATA2.H12CORE.1.P.B	Dnajc18	0.264	0.276	-0.012
chr11-87759957-87761030	-2.459	0.007	GATA2.H12CORE.0.PSM.A_GATA2.H12CORE.0.PSM.A	Prr11	0.018	0.031	-0.012
chr11-87759957-87761030	-2.459	0.007	GATA2.H12CORE.0.PSM.A_GATA2.H12CORE.0.PSM.A	Prr11	0.018	0.031	-0.012
chr3-108432245-108434266	3.593	0	GATA2.H12CORE.0.PSM.A_GATA2.H12CORE.0.PSM.A	Gstm4	0.031	0.043	-0.012
chr3-108432245-108434266	3.593	0	GATA2.H12CORE.1.P.B_GATA2.H12CORE.1.P.B	Gstm4	0.031	0.043	-0.012
chr3-108432245-108434266	3.593	0	GATA2.H12CORE.0.PSM.A_GATA2.H12CORE.0.PSM.A	Gstm4	0.031	0.043	-0.012
chr3-108432245-108434266	3.593	0	GATA2.H12CORE.1.P.B_GATA2.H12CORE.1.P.B	Gstm4	0.031	0.043	-0.012
chr8-122719602-122721611	3.184	0.001	GATA2.H12CORE.0.PSM.A_GATA2.H12CORE.0.PSM.A	Chmp1a	0.705	0.717	-0.012
chr8-122719602-122721611	3.184	0.001	GATA2.H12CORE.1.P.B_GATA2.H12CORE.1.P.B	Chmp1a	0.705	0.717	-0.012
chr8-122719602-122721611	3.184	0.001	GATA2.H12CORE.1.P.B_GATA2.H12CORE.1.P.B	Chmp1a	0.705	0.717	-0.012
chr8-122719602-122721611	3.184	0.001	GATA2.H12CORE.0.PSM.A_GATA2.H12CORE.0.PSM.A	Chmp1a	0.705	0.717	-0.012
chr8-122719602-122721611	3.184	0.001	GATA2.H12CORE.1.P.B_GATA2.H12CORE.1.P.B	Chmp1a	0.705	0.717	-0.012
chr8-122719602-122721611	3.184	0.001	GATA2.H12CORE.1.P.B_GATA2.H12CORE.1.P.B	Chmp1a	0.705	0.717	-0.012
chr18-35814237-35816482	-3.13	0.001	GATA2.H12CORE.0.PSM.A_GATA2.H12CORE.0.PSM.A	Gm26538	0	0.012	-0.012
chr18-35814237-35816482	-3.13	0.001	GATA2.H12CORE.1.P.B_GATA2.H12CORE.1.P.B	Gm26538	0	0.012	-0.012
chr18-35814237-35816482	-3.13	0.001	GATA2.H12CORE.1.P.B_GATA2.H12CORE.1.P.B	Gm26538	0	0.012	-0.012
chr18-35814237-35816482	-3.13	0.001	GATA2.H12CORE.0.PSM.A_GATA2.H12CORE.0.PSM.A	Gm26538	0	0.012	-0.012
chr18-35814237-35816482	-3.13	0.001	GATA2.H12CORE.1.P.B_GATA2.H12CORE.1.P.B	Gm26538	0	0.012	-0.012
chr18-35814237-35816482	-3.13	0.001	GATA2.H12CORE.1.P.B_GATA2.H12CORE.1.P.B	Gm26538	0	0.012	-0.012
chr18-35887369-35890083	-3.3	0	GATA2.H12CORE.0.PSM.A_GATA2.H12CORE.0.PSM.A	Gm26538	0	0.012	-0.012
chr18-35887369-35890083	-3.3	0	GATA2.H12CORE.1.P.B_GATA2.H12CORE.1.P.B	Gm26538	0	0.012	-0.012
chr18-35887369-35890083	-3.3	0	GATA2.H12CORE.0.PSM.A_GATA2.H12CORE.0.PSM.A	Gm26538	0	0.012	-0.012
chr18-35887369-35890083	-3.3	0	GATA2.H12CORE.1.P.B_GATA2.H12CORE.1.P.B	Gm26538	0	0.012	-0.012
chr15-85652611-85654383	4.103	0	GATA2.H12CORE.0.PSM.A_GATA2.H12CORE.0.PSM.A	Fbln1	0.017	0.029	-0.012
chr15-85652611-85654383	4.103	0	GATA2.H12CORE.1.P.B_GATA2.H12CORE.1.P.B	Fbln1	0.017	0.029	-0.012
chr15-85652611-85654383	4.103	0	GATA2.H12CORE.0.PSM.A_GATA2.H12CORE.0.PSM.A	Fbln1	0.017	0.029	-0.012
chr15-85652611-85654383	4.103	0	GATA2.H12CORE.1.P.B_GATA2.H12CORE.1.P.B	Fbln1	0.017	0.029	-0.012
chr8-122719602-122721611	3.985	0	GATA2.H12CORE.0.PSM.A_GATA2.H12CORE.0.PSM.A	Spire2	0.22	0.231	-0.011
chr8-122719602-122721611	3.985	0	GATA2.H12CORE.1.P.B_GATA2.H12CORE.1.P.B	Spire2	0.22	0.231	-0.011
chr8-122719602-122721611	3.985	0	GATA2.H12CORE.1.P.B_GATA2.H12CORE.1.P.B	Spire2	0.22	0.231	-0.011
chr8-122719602-122721611	3.985	0	GATA2.H12CORE.0.PSM.A_GATA2.H12CORE.0.PSM.A	Spire2	0.22	0.231	-0.011
chr8-122719602-122721611	3.985	0	GATA2.H12CORE.1.P.B_GATA2.H12CORE.1.P.B	Spire2	0.22	0.231	-0.011
chr8-122719602-122721611	3.985	0	GATA2.H12CORE.1.P.B_GATA2.H12CORE.1.P.B	Spire2	0.22	0.231	-0.011
chr2-152046976-152049497	-2.644	0.004	GATA2.H12CORE.0.PSM.A_GATA2.H12CORE.0.PSM.A	Zfp442	0.059	0.07	-0.011
chr2-152046976-152049497	-2.644	0.004	GATA2.H12CORE.1.P.B_GATA2.H12CORE.1.P.B	Zfp442	0.059	0.07	-0.011
chr2-152046976-152049497	-2.644	0.004	GATA2.H12CORE.0.PSM.A_GATA2.H12CORE.0.PSM.A	Zfp442	0.059	0.07	-0.011
chr2-152046976-152049497	-2.644	0.004	GATA2.H12CORE.1.P.B_GATA2.H12CORE.1.P.B	Zfp442	0.059	0.07	-0.011
chr11-114536504-114537704	3.452	0	GATA2.H12CORE.0.PSM.A_GATA2.H12CORE.0.PSM.A	Sdk2	0.132	0.143	-0.011
chr11-114536504-114537704	3.452	0	GATA2.H12CORE.0.PSM.A_GATA2.H12CORE.0.PSM.A	Sdk2	0.132	0.143	-0.011
chr9-107369329-107370687	-3.275	0.001	GATA2.H12CORE.0.PSM.A_GATA2.H12CORE.0.PSM.A	Traip	0.025	0.036	-0.011
chr9-107369329-107370687	-3.275	0.001	GATA2.H12CORE.1.P.B_GATA2.H12CORE.1.P.B	Traip	0.025	0.036	-0.011
chr9-107369329-107370687	-3.275	0.001	GATA2.H12CORE.0.PSM.A_GATA2.H12CORE.0.PSM.A	Traip	0.025	0.036	-0.011
chr9-107369329-107370687	-3.275	0.001	GATA2.H12CORE.1.P.B_GATA2.H12CORE.1.P.B	Traip	0.025	0.036	-0.011
chr9-107722761-107724418	3.561	0	GATA2.H12CORE.0.PSM.A_GATA2.H12CORE.0.PSM.A	4930524O07Rik	0.01	0.021	-0.011
chr9-107722761-107724418	3.561	0	GATA2.H12CORE.1.P.B_GATA2.H12CORE.1.P.B	4930524O07Rik	0.01	0.021	-0.011
chr9-107722761-107724418	3.561	0	GATA2.H12CORE.1.P.B_GATA2.H12CORE.1.P.B	4930524O07Rik	0.01	0.021	-0.011
chr11-87759957-87761030	-2.449	0.007	GATA2.H12CORE.0.PSM.A_GATA2.H12CORE.0.PSM.A	Smg8	0.116	0.127	-0.011
chr11-87759957-87761030	-2.449	0.007	GATA2.H12CORE.0.PSM.A_GATA2.H12CORE.0.PSM.A	Smg8	0.116	0.127	-0.011
chr4-140188494-140189261	-2.616	0.004	GATA2.H12CORE.0.PSM.A_GATA2.H12CORE.0.PSM.A	Arhgef10l	0.226	0.236	-0.011
chr4-140188494-140189261	-2.616	0.004	GATA2.H12CORE.0.PSM.A_GATA2.H12CORE.0.PSM.A	Arhgef10l	0.226	0.236	-0.011
chr4-140188494-140189261	-2.616	0.004	GATA2.H12CORE.1.P.B_GATA2.H12CORE.1.P.B	Arhgef10l	0.226	0.236	-0.011
chr4-140188494-140189261	-2.616	0.004	GATA2.H12CORE.1.P.B_GATA2.H12CORE.1.P.B	Arhgef10l	0.226	0.236	-0.011
chr4-140188494-140189261	-2.616	0.004	GATA2.H12CORE.0.PSM.A_GATA2.H12CORE.0.PSM.A	Arhgef10l	0.226	0.236	-0.011
chr4-140188494-140189261	-2.616	0.004	GATA2.H12CORE.0.PSM.A_GATA2.H12CORE.0.PSM.A	Arhgef10l	0.226	0.236	-0.011
chr4-140188494-140189261	-2.616	0.004	GATA2.H12CORE.1.P.B_GATA2.H12CORE.1.P.B	Arhgef10l	0.226	0.236	-0.011
chr4-140188494-140189261	-2.616	0.004	GATA2.H12CORE.1.P.B_GATA2.H12CORE.1.P.B	Arhgef10l	0.226	0.236	-0.011
chr4-117644634-117647845	4.333	0	GATA2.H12CORE.0.PSM.A_GATA2.H12CORE.0.PSM.A	Gm12840	0	0.011	-0.011
chr4-117644634-117647845	4.333	0	GATA2.H12CORE.1.P.B_GATA2.H12CORE.1.P.B	Gm12840	0	0.011	-0.011
chr4-117644634-117647845	4.333	0	GATA2.H12CORE.0.PSM.A_GATA2.H12CORE.0.PSM.A	Gm12840	0	0.011	-0.011
chr4-117644634-117647845	4.333	0	GATA2.H12CORE.1.P.B_GATA2.H12CORE.1.P.B	Gm12840	0	0.011	-0.011
chr7-30532717-30533299	-2.448	0.007	GATA2.H12CORE.0.PSM.A_GATA2.H12CORE.0.PSM.A	Pld3	0.331	0.341	-0.011
chr7-30532717-30533299	-2.448	0.007	GATA2.H12CORE.0.PSM.A_GATA2.H12CORE.0.PSM.A	Pld3	0.331	0.341	-0.011
chr12-80517981-80520305	2.472	0.007	GATA2.H12CORE.1.P.B_GATA2.H12CORE.1.P.B	Gm20498	0.036	0.047	-0.01
chr12-80517981-80520305	2.472	0.007	GATA2.H12CORE.1.P.B_GATA2.H12CORE.1.P.B	Gm20498	0.036	0.047	-0.01
chr3-108432245-108434266	-4.475	0	GATA2.H12CORE.0.PSM.A_GATA2.H12CORE.0.PSM.A	Kcna2	0.045	0.055	-0.01
chr3-108432245-108434266	-4.475	0	GATA2.H12CORE.1.P.B_GATA2.H12CORE.1.P.B	Kcna2	0.045	0.055	-0.01
chr3-108432245-108434266	-4.475	0	GATA2.H12CORE.0.PSM.A_GATA2.H12CORE.0.PSM.A	Kcna2	0.045	0.055	-0.01
chr3-108432245-108434266	-4.475	0	GATA2.H12CORE.1.P.B_GATA2.H12CORE.1.P.B	Kcna2	0.045	0.055	-0.01
chr3-108432245-108434266	-4.487	0	GATA2.H12CORE.0.PSM.A_GATA2.H12CORE.0.PSM.A	Mybphl	0.001	0.01	-0.01
chr3-108432245-108434266	-4.487	0	GATA2.H12CORE.1.P.B_GATA2.H12CORE.1.P.B	Mybphl	0.001	0.01	-0.01
chr3-108432245-108434266	-4.487	0	GATA2.H12CORE.0.PSM.A_GATA2.H12CORE.0.PSM.A	Mybphl	0.001	0.01	-0.01
chr3-108432245-108434266	-4.487	0	GATA2.H12CORE.1.P.B_GATA2.H12CORE.1.P.B	Mybphl	0.001	0.01	-0.01
chr11-120279311-120281135	2.633	0.004	GATA2.H12CORE.0.PSM.A_GATA2.H12CORE.0.PSM.A	Cenpx	0.601	0.611	-0.009
chr11-120279311-120281135	2.633	0.004	GATA2.H12CORE.1.P.B_GATA2.H12CORE.1.P.B	Cenpx	0.601	0.611	-0.009
chr11-120279311-120281135	2.633	0.004	GATA2.H12CORE.0.PSM.A_GATA2.H12CORE.0.PSM.A	Cenpx	0.601	0.611	-0.009
chr11-120279311-120281135	2.633	0.004	GATA2.H12CORE.1.P.B_GATA2.H12CORE.1.P.B	Cenpx	0.601	0.611	-0.009
chr8-122296034-122296849	-2.616	0.004	GATA2.H12CORE.0.PSM.A_GATA2.H12CORE.0.PSM.A	Spata2l	0.005	0.014	-0.009
chr8-122296034-122296849	-2.616	0.004	GATA2.H12CORE.0.PSM.A_GATA2.H12CORE.0.PSM.A	Spata2l	0.005	0.014	-0.009
chr8-122296034-122296849	-2.616	0.004	GATA2.H12CORE.1.P.B_GATA2.H12CORE.1.P.B	Spata2l	0.005	0.014	-0.009
chr8-122296034-122296849	-2.616	0.004	GATA2.H12CORE.1.P.B_GATA2.H12CORE.1.P.B	Spata2l	0.005	0.014	-0.009
chr8-122296034-122296849	-2.616	0.004	GATA2.H12CORE.0.PSM.A_GATA2.H12CORE.0.PSM.A	Spata2l	0.005	0.014	-0.009
chr8-122296034-122296849	-2.616	0.004	GATA2.H12CORE.0.PSM.A_GATA2.H12CORE.0.PSM.A	Spata2l	0.005	0.014	-0.009
chr8-122296034-122296849	-2.616	0.004	GATA2.H12CORE.1.P.B_GATA2.H12CORE.1.P.B	Spata2l	0.005	0.014	-0.009
chr8-122296034-122296849	-2.616	0.004	GATA2.H12CORE.1.P.B_GATA2.H12CORE.1.P.B	Spata2l	0.005	0.014	-0.009
chr15-85652611-85654383	-2.684	0.004	GATA2.H12CORE.0.PSM.A_GATA2.H12CORE.0.PSM.A	Gramd4	0.109	0.118	-0.009
chr15-85652611-85654383	-2.684	0.004	GATA2.H12CORE.1.P.B_GATA2.H12CORE.1.P.B	Gramd4	0.109	0.118	-0.009
chr15-85652611-85654383	-2.684	0.004	GATA2.H12CORE.0.PSM.A_GATA2.H12CORE.0.PSM.A	Gramd4	0.109	0.118	-0.009
chr15-85652611-85654383	-2.684	0.004	GATA2.H12CORE.1.P.B_GATA2.H12CORE.1.P.B	Gramd4	0.109	0.118	-0.009
chr1-132738799-132739614	4.007	0	GATA2.H12CORE.1.P.B_GATA2.H12CORE.1.P.B	Plekha6	0.353	0.362	-0.009
chr1-132738799-132739614	4.007	0	GATA2.H12CORE.1.P.B_GATA2.H12CORE.1.P.B	Plekha6	0.353	0.362	-0.009
chr7-109114530-109116326	-3.044	0.001	GATA2.H12CORE.0.PSM.A_GATA2.H12CORE.0.PSM.A	Nrip3	0.001	0.01	-0.009
chr7-109114530-109116326	-3.044	0.001	GATA2.H12CORE.1.P.B_GATA2.H12CORE.1.P.B	Nrip3	0.001	0.01	-0.009
chr7-109114530-109116326	-3.044	0.001	GATA2.H12CORE.1.P.B_GATA2.H12CORE.1.P.B	Nrip3	0.001	0.01	-0.009
chr7-109114530-109116326	-3.044	0.001	GATA2.H12CORE.0.PSM.A_GATA2.H12CORE.0.PSM.A	Nrip3	0.001	0.01	-0.009
chr7-109114530-109116326	-3.044	0.001	GATA2.H12CORE.1.P.B_GATA2.H12CORE.1.P.B	Nrip3	0.001	0.01	-0.009
chr7-109114530-109116326	-3.044	0.001	GATA2.H12CORE.1.P.B_GATA2.H12CORE.1.P.B	Nrip3	0.001	0.01	-0.009
chr7-109190630-109192251	-4.389	0	GATA2.H12CORE.0.PSM.A_GATA2.H12CORE.0.PSM.A	Nrip3	0.001	0.01	-0.009
chr7-109190630-109192251	-4.389	0	GATA2.H12CORE.0.PSM.A_GATA2.H12CORE.0.PSM.A	Nrip3	0.001	0.01	-0.009
chr15-85652611-85654383	3.091	0.001	GATA2.H12CORE.0.PSM.A_GATA2.H12CORE.0.PSM.A	Wnt7b	0	0.009	-0.009
chr15-85652611-85654383	3.091	0.001	GATA2.H12CORE.1.P.B_GATA2.H12CORE.1.P.B	Wnt7b	0	0.009	-0.009
chr15-85652611-85654383	3.091	0.001	GATA2.H12CORE.0.PSM.A_GATA2.H12CORE.0.PSM.A	Wnt7b	0	0.009	-0.009
chr15-85652611-85654383	3.091	0.001	GATA2.H12CORE.1.P.B_GATA2.H12CORE.1.P.B	Wnt7b	0	0.009	-0.009
chr15-99663969-99665409	-3.501	0	GATA2.H12CORE.0.PSM.A_GATA2.H12CORE.0.PSM.A	Gpd1	0.021	0.03	-0.009
chr15-99663969-99665409	-3.501	0	GATA2.H12CORE.1.P.B_GATA2.H12CORE.1.P.B	Gpd1	0.021	0.03	-0.009
chr15-99663969-99665409	-3.501	0	GATA2.H12CORE.1.P.B_GATA2.H12CORE.1.P.B	Gpd1	0.021	0.03	-0.009
chr15-99663969-99665409	-3.501	0	GATA2.H12CORE.0.PSM.A_GATA2.H12CORE.0.PSM.A	Gpd1	0.021	0.03	-0.009
chr15-99663969-99665409	-3.501	0	GATA2.H12CORE.1.P.B_GATA2.H12CORE.1.P.B	Gpd1	0.021	0.03	-0.009
chr15-99663969-99665409	-3.501	0	GATA2.H12CORE.1.P.B_GATA2.H12CORE.1.P.B	Gpd1	0.021	0.03	-0.009
chr5-42066968-42068691	3.818	0	GATA2.H12CORE.0.PSM.A_GATA2.H12CORE.0.PSM.A	Bod1l	0.843	0.851	-0.009
chr5-42066968-42068691	3.818	0	GATA2.H12CORE.1.P.B_GATA2.H12CORE.1.P.B	Bod1l	0.843	0.851	-0.009
chr5-42066968-42068691	3.818	0	GATA2.H12CORE.1.P.B_GATA2.H12CORE.1.P.B	Bod1l	0.843	0.851	-0.009
chr5-42066968-42068691	3.818	0	GATA2.H12CORE.0.PSM.A_GATA2.H12CORE.0.PSM.A	Bod1l	0.843	0.851	-0.009
chr5-42066968-42068691	3.818	0	GATA2.H12CORE.1.P.B_GATA2.H12CORE.1.P.B	Bod1l	0.843	0.851	-0.009
chr5-42066968-42068691	3.818	0	GATA2.H12CORE.1.P.B_GATA2.H12CORE.1.P.B	Bod1l	0.843	0.851	-0.009
chr10-60193379-60195507	-4.012	0	GATA2.H12CORE.1.P.B_GATA2.H12CORE.1.P.B	Ascc1	0.374	0.382	-0.008
chr10-60193379-60195507	-4.012	0	GATA2.H12CORE.1.P.B_GATA2.H12CORE.1.P.B	Ascc1	0.374	0.382	-0.008
chr2-26500037-26501126	3.153	0.001	GATA2.H12CORE.1.P.B_GATA2.H12CORE.1.P.B	Sapcd2	0.01	0.018	-0.008
chr2-26500037-26501126	3.153	0.001	GATA2.H12CORE.1.P.B_GATA2.H12CORE.1.P.B	Sapcd2	0.01	0.018	-0.008
chr4-117644634-117647845	2.649	0.004	GATA2.H12CORE.0.PSM.A_GATA2.H12CORE.0.PSM.A	Gm12827	0	0.008	-0.007
chr4-117644634-117647845	2.649	0.004	GATA2.H12CORE.1.P.B_GATA2.H12CORE.1.P.B	Gm12827	0	0.008	-0.007
chr4-117644634-117647845	2.649	0.004	GATA2.H12CORE.0.PSM.A_GATA2.H12CORE.0.PSM.A	Gm12827	0	0.008	-0.007
chr4-117644634-117647845	2.649	0.004	GATA2.H12CORE.1.P.B_GATA2.H12CORE.1.P.B	Gm12827	0	0.008	-0.007
chr8-84729810-84732148	-2.467	0.007	GATA2.H12CORE.0.PSM.A_GATA2.H12CORE.0.PSM.A	Zfp791	0.013	0.02	-0.007
chr8-84729810-84732148	-2.467	0.007	GATA2.H12CORE.1.P.B_GATA2.H12CORE.1.P.B	Zfp791	0.013	0.02	-0.007
chr8-84729810-84732148	-2.467	0.007	GATA2.H12CORE.1.P.B_GATA2.H12CORE.1.P.B	Zfp791	0.013	0.02	-0.007
chr8-84729810-84732148	-2.467	0.007	GATA2.H12CORE.0.PSM.A_GATA2.H12CORE.0.PSM.A	Zfp791	0.013	0.02	-0.007
chr8-84729810-84732148	-2.467	0.007	GATA2.H12CORE.1.P.B_GATA2.H12CORE.1.P.B	Zfp791	0.013	0.02	-0.007
chr8-84729810-84732148	-2.467	0.007	GATA2.H12CORE.1.P.B_GATA2.H12CORE.1.P.B	Zfp791	0.013	0.02	-0.007
chr12-80517981-80520305	2.831	0.002	GATA2.H12CORE.1.P.B_GATA2.H12CORE.1.P.B	Galnt16	0.088	0.095	-0.007
chr12-80517981-80520305	2.831	0.002	GATA2.H12CORE.1.P.B_GATA2.H12CORE.1.P.B	Galnt16	0.088	0.095	-0.007
chr10-60193379-60195507	-4.173	0	GATA2.H12CORE.1.P.B_GATA2.H12CORE.1.P.B	Cdh23	0.001	0.008	-0.007
chr10-60193379-60195507	-4.173	0	GATA2.H12CORE.1.P.B_GATA2.H12CORE.1.P.B	Cdh23	0.001	0.008	-0.007
chr7-30532717-30533299	-2.391	0.008	GATA2.H12CORE.0.PSM.A_GATA2.H12CORE.0.PSM.A	Lrfn1	0.11	0.117	-0.007
chr7-30532717-30533299	-2.391	0.008	GATA2.H12CORE.0.PSM.A_GATA2.H12CORE.0.PSM.A	Lrfn1	0.11	0.117	-0.007
chr17-56896196-56897222	2.984	0.001	GATA2.H12CORE.0.PSM.A_GATA2.H12CORE.0.PSM.A	Prr22	0.015	0.022	-0.007
chr17-56896196-56897222	2.984	0.001	GATA2.H12CORE.0.PSM.A_GATA2.H12CORE.0.PSM.A	Prr22	0.015	0.022	-0.007
chr14-54430422-54433714	2.497	0.006	GATA2.H12CORE.0.PSM.A_GATA2.H12CORE.0.PSM.A	Ajuba	0.002	0.009	-0.007
chr14-54430422-54433714	2.497	0.006	GATA2.H12CORE.1.P.B_GATA2.H12CORE.1.P.B	Ajuba	0.002	0.009	-0.007
chr14-54430422-54433714	2.497	0.006	GATA2.H12CORE.0.PSM.A_GATA2.H12CORE.0.PSM.A	Ajuba	0.002	0.009	-0.007
chr14-54430422-54433714	2.497	0.006	GATA2.H12CORE.1.P.B_GATA2.H12CORE.1.P.B	Ajuba	0.002	0.009	-0.007
chr3-108432245-108434266	-4.031	0	GATA2.H12CORE.0.PSM.A_GATA2.H12CORE.0.PSM.A	Gm27008	0.003	0.01	-0.007
chr3-108432245-108434266	-4.031	0	GATA2.H12CORE.1.P.B_GATA2.H12CORE.1.P.B	Gm27008	0.003	0.01	-0.007
chr9-107369329-107370687	2.386	0.009	GATA2.H12CORE.0.PSM.A_GATA2.H12CORE.0.PSM.A	Gm28111	0	0.006	-0.006
chr9-107369329-107370687	2.386	0.009	GATA2.H12CORE.1.P.B_GATA2.H12CORE.1.P.B	Gm28111	0	0.006	-0.006
chr13-72298052-72299252	-2.458	0.007	GATA2.H12CORE.0.PSM.A_GATA2.H12CORE.0.PSM.A	Lrrc14b	0	0.006	-0.006
chr13-72298052-72299252	-2.458	0.007	GATA2.H12CORE.0.PSM.A_GATA2.H12CORE.0.PSM.A	Lrrc14b	0	0.006	-0.006
chr13-72298052-72299252	-2.458	0.007	GATA2.H12CORE.1.P.B_GATA2.H12CORE.1.P.B	Lrrc14b	0	0.006	-0.006
chr13-72298052-72299252	-2.458	0.007	GATA2.H12CORE.1.P.B_GATA2.H12CORE.1.P.B	Lrrc14b	0	0.006	-0.006
chr13-72298052-72299252	-2.458	0.007	GATA2.H12CORE.0.PSM.A_GATA2.H12CORE.0.PSM.A	Lrrc14b	0	0.006	-0.006
chr13-72298052-72299252	-2.458	0.007	GATA2.H12CORE.0.PSM.A_GATA2.H12CORE.0.PSM.A	Lrrc14b	0	0.006	-0.006
chr13-72298052-72299252	-2.458	0.007	GATA2.H12CORE.1.P.B_GATA2.H12CORE.1.P.B	Lrrc14b	0	0.006	-0.006
chr13-72298052-72299252	-2.458	0.007	GATA2.H12CORE.1.P.B_GATA2.H12CORE.1.P.B	Lrrc14b	0	0.006	-0.006
chr2-152046976-152049497	-4.564	0	GATA2.H12CORE.0.PSM.A_GATA2.H12CORE.0.PSM.A	Ttll9	0.008	0.014	-0.006
chr2-152046976-152049497	-4.564	0	GATA2.H12CORE.1.P.B_GATA2.H12CORE.1.P.B	Ttll9	0.008	0.014	-0.006
chr2-152046976-152049497	-4.564	0	GATA2.H12CORE.0.PSM.A_GATA2.H12CORE.0.PSM.A	Ttll9	0.008	0.014	-0.006
chr2-152046976-152049497	-4.564	0	GATA2.H12CORE.1.P.B_GATA2.H12CORE.1.P.B	Ttll9	0.008	0.014	-0.006
chr11-102227380-102228571	-2.993	0.001	GATA2.H12CORE.0.PSM.A_GATA2.H12CORE.0.PSM.A	Atxn7l3	0.525	0.531	-0.006
chr11-102227380-102228571	-2.993	0.001	GATA2.H12CORE.1.P.B_GATA2.H12CORE.1.P.B	Atxn7l3	0.525	0.531	-0.006
chr11-102227380-102228571	-2.993	0.001	GATA2.H12CORE.0.PSM.A_GATA2.H12CORE.0.PSM.A	Atxn7l3	0.525	0.531	-0.006
chr11-102227380-102228571	-2.993	0.001	GATA2.H12CORE.1.P.B_GATA2.H12CORE.1.P.B	Atxn7l3	0.525	0.531	-0.006
chr4-117644634-117647845	2.528	0.006	GATA2.H12CORE.0.PSM.A_GATA2.H12CORE.0.PSM.A	B4galt2	0.225	0.231	-0.006
chr4-117644634-117647845	2.528	0.006	GATA2.H12CORE.1.P.B_GATA2.H12CORE.1.P.B	B4galt2	0.225	0.231	-0.006
chr4-117644634-117647845	2.528	0.006	GATA2.H12CORE.0.PSM.A_GATA2.H12CORE.0.PSM.A	B4galt2	0.225	0.231	-0.006
chr4-117644634-117647845	2.528	0.006	GATA2.H12CORE.1.P.B_GATA2.H12CORE.1.P.B	B4galt2	0.225	0.231	-0.006
chr14-54430422-54433714	2.654	0.004	GATA2.H12CORE.0.PSM.A_GATA2.H12CORE.0.PSM.A	Cenpj	0.072	0.078	-0.006
chr14-54430422-54433714	2.654	0.004	GATA2.H12CORE.1.P.B_GATA2.H12CORE.1.P.B	Cenpj	0.072	0.078	-0.006
chr14-54430422-54433714	2.654	0.004	GATA2.H12CORE.0.PSM.A_GATA2.H12CORE.0.PSM.A	Cenpj	0.072	0.078	-0.006
chr14-54430422-54433714	2.654	0.004	GATA2.H12CORE.1.P.B_GATA2.H12CORE.1.P.B	Cenpj	0.072	0.078	-0.006
chr15-85652611-85654383	3.774	0	GATA2.H12CORE.0.PSM.A_GATA2.H12CORE.0.PSM.A	Ppara	0	0.006	-0.006
chr15-85652611-85654383	3.774	0	GATA2.H12CORE.1.P.B_GATA2.H12CORE.1.P.B	Ppara	0	0.006	-0.006
chr15-85652611-85654383	3.774	0	GATA2.H12CORE.0.PSM.A_GATA2.H12CORE.0.PSM.A	Ppara	0	0.006	-0.006
chr15-85652611-85654383	3.774	0	GATA2.H12CORE.1.P.B_GATA2.H12CORE.1.P.B	Ppara	0	0.006	-0.006
chr16-37990318-37991452	-2.432	0.008	GATA2.H12CORE.1.P.B_GATA2.H12CORE.1.P.B	D930030I03Rik	0.007	0.012	-0.006
chr16-37990318-37991452	-2.432	0.008	GATA2.H12CORE.1.P.B_GATA2.H12CORE.1.P.B	D930030I03Rik	0.007	0.012	-0.006
chr2-153527703-153530600	2.346	0.009	GATA2.H12CORE.1.P.B_GATA2.H12CORE.1.P.B	4930519P11Rik	0	0.006	-0.006
chr2-26500037-26501126	4.083	0	GATA2.H12CORE.1.P.B_GATA2.H12CORE.1.P.B	Dpp7	0.109	0.115	-0.006
chr2-26500037-26501126	4.083	0	GATA2.H12CORE.1.P.B_GATA2.H12CORE.1.P.B	Dpp7	0.109	0.115	-0.006
chr7-109114530-109116326	-2.339	0.01	GATA2.H12CORE.0.PSM.A_GATA2.H12CORE.0.PSM.A	Cnga4	0	0.005	-0.005
chr7-109114530-109116326	-2.339	0.01	GATA2.H12CORE.1.P.B_GATA2.H12CORE.1.P.B	Cnga4	0	0.005	-0.005
chr7-109114530-109116326	-2.339	0.01	GATA2.H12CORE.1.P.B_GATA2.H12CORE.1.P.B	Cnga4	0	0.005	-0.005
chr7-109114530-109116326	-2.339	0.01	GATA2.H12CORE.0.PSM.A_GATA2.H12CORE.0.PSM.A	Cnga4	0	0.005	-0.005
chr7-109114530-109116326	-2.339	0.01	GATA2.H12CORE.1.P.B_GATA2.H12CORE.1.P.B	Cnga4	0	0.005	-0.005
chr7-109114530-109116326	-2.339	0.01	GATA2.H12CORE.1.P.B_GATA2.H12CORE.1.P.B	Cnga4	0	0.005	-0.005
chr4-47449028-47450664	-4.02	0	GATA2.H12CORE.0.PSM.A_GATA2.H12CORE.0.PSM.A	Grin3a	0.013	0.018	-0.005
chr4-47449028-47450664	-4.02	0	GATA2.H12CORE.1.P.B_GATA2.H12CORE.1.P.B	Grin3a	0.013	0.018	-0.005
chr4-47449028-47450664	-4.02	0	GATA2.H12CORE.0.PSM.A_GATA2.H12CORE.0.PSM.A	Grin3a	0.013	0.018	-0.005
chr4-47449028-47450664	-4.02	0	GATA2.H12CORE.1.P.B_GATA2.H12CORE.1.P.B	Grin3a	0.013	0.018	-0.005
chr4-53796712-53797800	-2.327	0.01	GATA2.H12CORE.0.PSM.A_GATA2.H12CORE.0.PSM.A	Smc2	0.162	0.167	-0.005
chr4-53796712-53797800	-2.327	0.01	GATA2.H12CORE.0.PSM.A_GATA2.H12CORE.0.PSM.A	Smc2	0.162	0.167	-0.005
chr4-53796712-53797800	-2.327	0.01	GATA2.H12CORE.1.P.B_GATA2.H12CORE.1.P.B	Smc2	0.162	0.167	-0.005
chr4-53796712-53797800	-2.327	0.01	GATA2.H12CORE.1.P.B_GATA2.H12CORE.1.P.B	Smc2	0.162	0.167	-0.005
chr4-53796712-53797800	-2.327	0.01	GATA2.H12CORE.0.PSM.A_GATA2.H12CORE.0.PSM.A	Smc2	0.162	0.167	-0.005
chr4-53796712-53797800	-2.327	0.01	GATA2.H12CORE.0.PSM.A_GATA2.H12CORE.0.PSM.A	Smc2	0.162	0.167	-0.005
chr4-53796712-53797800	-2.327	0.01	GATA2.H12CORE.1.P.B_GATA2.H12CORE.1.P.B	Smc2	0.162	0.167	-0.005
chr4-53796712-53797800	-2.327	0.01	GATA2.H12CORE.1.P.B_GATA2.H12CORE.1.P.B	Smc2	0.162	0.167	-0.005
chr5-130143821-130145428	-2.578	0.005	GATA2.H12CORE.1.P.B_GATA2.H12CORE.1.P.B	Vkorc1l1	0.286	0.291	-0.005
chr5-130143821-130145428	-2.578	0.005	GATA2.H12CORE.1.P.B_GATA2.H12CORE.1.P.B	Vkorc1l1	0.286	0.291	-0.005
chr17-56367994-56368766	-2.429	0.008	GATA2.H12CORE.0.PSM.A_GATA2.H12CORE.0.PSM.A	1700061G19Rik	0	0.005	-0.005
chr17-56367994-56368766	-2.429	0.008	GATA2.H12CORE.1.P.B_GATA2.H12CORE.1.P.B	1700061G19Rik	0	0.005	-0.005
chr17-56367994-56368766	-2.429	0.008	GATA2.H12CORE.0.PSM.A_GATA2.H12CORE.0.PSM.A	1700061G19Rik	0	0.005	-0.005
chr17-56367994-56368766	-2.429	0.008	GATA2.H12CORE.1.P.B_GATA2.H12CORE.1.P.B	1700061G19Rik	0	0.005	-0.005
chr5-114776222-114776466	2.798	0.003	GATA2.H12CORE.0.PSM.A_GATA2.H12CORE.0.PSM.A	Gatc	0.147	0.152	-0.005
chr5-114776222-114776466	2.798	0.003	GATA2.H12CORE.0.PSM.A_GATA2.H12CORE.0.PSM.A	Gatc	0.147	0.152	-0.005
chr13-51848591-51849848	2.625	0.004	GATA2.H12CORE.0.PSM.A_GATA2.H12CORE.0.PSM.A	Secisbp2	0.292	0.297	-0.005
chr13-51848591-51849848	2.625	0.004	GATA2.H12CORE.0.PSM.A_GATA2.H12CORE.0.PSM.A	Secisbp2	0.292	0.297	-0.005
chr13-51917632-51919699	3.581	0	GATA2.H12CORE.1.P.B_GATA2.H12CORE.1.P.B	Secisbp2	0.292	0.297	-0.005
chr13-51917632-51919699	3.581	0	GATA2.H12CORE.1.P.B_GATA2.H12CORE.1.P.B	Secisbp2	0.292	0.297	-0.005
chr15-99636844-99638249	2.733	0.003	GATA2.H12CORE.0.PSM.A_GATA2.H12CORE.0.PSM.A	Aqp6	0.026	0.031	-0.005
chr15-99636844-99638249	2.733	0.003	GATA2.H12CORE.1.P.B_GATA2.H12CORE.1.P.B	Aqp6	0.026	0.031	-0.005
chr15-99636844-99638249	2.733	0.003	GATA2.H12CORE.0.PSM.A_GATA2.H12CORE.0.PSM.A	Aqp6	0.026	0.031	-0.005
chr15-99636844-99638249	2.733	0.003	GATA2.H12CORE.1.P.B_GATA2.H12CORE.1.P.B	Aqp6	0.026	0.031	-0.005
chr15-99663969-99665409	5.461	0	GATA2.H12CORE.0.PSM.A_GATA2.H12CORE.0.PSM.A	Aqp6	0.026	0.031	-0.005
chr15-99663969-99665409	5.461	0	GATA2.H12CORE.1.P.B_GATA2.H12CORE.1.P.B	Aqp6	0.026	0.031	-0.005
chr15-99663969-99665409	5.461	0	GATA2.H12CORE.1.P.B_GATA2.H12CORE.1.P.B	Aqp6	0.026	0.031	-0.005
chr15-99663969-99665409	5.461	0	GATA2.H12CORE.0.PSM.A_GATA2.H12CORE.0.PSM.A	Aqp6	0.026	0.031	-0.005
chr15-99663969-99665409	5.461	0	GATA2.H12CORE.1.P.B_GATA2.H12CORE.1.P.B	Aqp6	0.026	0.031	-0.005
chr15-99663969-99665409	5.461	0	GATA2.H12CORE.1.P.B_GATA2.H12CORE.1.P.B	Aqp6	0.026	0.031	-0.005
chr5-31082378-31084563	-4.683	0	GATA2.H12CORE.0.PSM.A_GATA2.H12CORE.0.PSM.A	4930548H24Rik	0	0.005	-0.005
chr5-31082378-31084563	-4.683	0	GATA2.H12CORE.0.PSM.A_GATA2.H12CORE.0.PSM.A	4930548H24Rik	0	0.005	-0.005
chr17-56367994-56368766	4.25	0	GATA2.H12CORE.0.PSM.A_GATA2.H12CORE.0.PSM.A	Kdm4b	0.325	0.33	-0.005
chr17-56367994-56368766	4.25	0	GATA2.H12CORE.1.P.B_GATA2.H12CORE.1.P.B	Kdm4b	0.325	0.33	-0.005
chr17-56367994-56368766	4.25	0	GATA2.H12CORE.0.PSM.A_GATA2.H12CORE.0.PSM.A	Kdm4b	0.325	0.33	-0.005
chr17-56367994-56368766	4.25	0	GATA2.H12CORE.1.P.B_GATA2.H12CORE.1.P.B	Kdm4b	0.325	0.33	-0.005
chr3-88359412-88360654	2.697	0.003	GATA2.H12CORE.0.PSM.A_GATA2.H12CORE.0.PSM.A	Bglap3	0	0.005	-0.005
chr3-88359412-88360654	2.697	0.003	GATA2.H12CORE.0.PSM.A_GATA2.H12CORE.0.PSM.A	Bglap3	0	0.005	-0.005
chr13-51917632-51919699	-3.03	0.001	GATA2.H12CORE.1.P.B_GATA2.H12CORE.1.P.B	Sema4d	0.028	0.033	-0.005
chr13-51917632-51919699	-3.03	0.001	GATA2.H12CORE.1.P.B_GATA2.H12CORE.1.P.B	Sema4d	0.028	0.033	-0.005
chr12-80061772-80063302	2.721	0.003	GATA2.H12CORE.1.P.B_GATA2.H12CORE.1.P.B	Slc39a9	0.103	0.107	-0.005
chr12-80061772-80063302	2.721	0.003	GATA2.H12CORE.1.P.B_GATA2.H12CORE.1.P.B	Slc39a9	0.103	0.107	-0.005
chr12-80061772-80063302	3.827	0	GATA2.H12CORE.1.P.B_GATA2.H12CORE.1.P.B	Smoc1	0.005	0.009	-0.005
chr12-80061772-80063302	3.827	0	GATA2.H12CORE.1.P.B_GATA2.H12CORE.1.P.B	Smoc1	0.005	0.009	-0.005
chr5-125151539-125152476	2.595	0.005	GATA2.H12CORE.0.PSM.A_GATA2.H12CORE.0.PSM.A	Tmem132c	0.001	0.005	-0.005
chr5-125151539-125152476	2.595	0.005	GATA2.H12CORE.1.P.B_GATA2.H12CORE.1.P.B	Tmem132c	0.001	0.005	-0.005
chr5-125151539-125152476	2.595	0.005	GATA2.H12CORE.0.PSM.A_GATA2.H12CORE.0.PSM.A	Tmem132c	0.001	0.005	-0.005
chr5-125151539-125152476	2.595	0.005	GATA2.H12CORE.1.P.B_GATA2.H12CORE.1.P.B	Tmem132c	0.001	0.005	-0.005
chr1-75445085-75447030	4.364	0	GATA2.H12CORE.0.PSM.A_GATA2.H12CORE.0.PSM.A	Des	0.009	0.013	-0.005
chr1-75445085-75447030	4.364	0	GATA2.H12CORE.1.P.B_GATA2.H12CORE.1.P.B	Des	0.009	0.013	-0.005
chr1-75445085-75447030	4.364	0	GATA2.H12CORE.0.PSM.A_GATA2.H12CORE.0.PSM.A	Des	0.009	0.013	-0.005
chr1-75445085-75447030	4.364	0	GATA2.H12CORE.1.P.B_GATA2.H12CORE.1.P.B	Des	0.009	0.013	-0.005
chr1-75448932-75450868	3.173	0.001	GATA2.H12CORE.0.PSM.A_GATA2.H12CORE.0.PSM.A	Des	0.009	0.013	-0.005
chr1-75448932-75450868	3.173	0.001	GATA2.H12CORE.1.P.B_GATA2.H12CORE.1.P.B	Des	0.009	0.013	-0.005
chr1-75448932-75450868	3.173	0.001	GATA2.H12CORE.0.PSM.A_GATA2.H12CORE.0.PSM.A	Des	0.009	0.013	-0.005
chr1-75448932-75450868	3.173	0.001	GATA2.H12CORE.1.P.B_GATA2.H12CORE.1.P.B	Des	0.009	0.013	-0.005
chr11-102227380-102228571	-4.1	0	GATA2.H12CORE.0.PSM.A_GATA2.H12CORE.0.PSM.A	Tmub2	0.47	0.475	-0.004
chr11-102227380-102228571	-4.1	0	GATA2.H12CORE.1.P.B_GATA2.H12CORE.1.P.B	Tmub2	0.47	0.475	-0.004
chr11-102227380-102228571	-4.1	0	GATA2.H12CORE.0.PSM.A_GATA2.H12CORE.0.PSM.A	Tmub2	0.47	0.475	-0.004
chr11-102227380-102228571	-4.1	0	GATA2.H12CORE.1.P.B_GATA2.H12CORE.1.P.B	Tmub2	0.47	0.475	-0.004
chr1-133491895-133493784	-3.702	0	GATA2.H12CORE.0.PSM.A_GATA2.H12CORE.0.PSM.A	Gm38394	0.013	0.018	-0.004
chr1-133491895-133493784	-3.702	0	GATA2.H12CORE.0.PSM.A_GATA2.H12CORE.0.PSM.A	Gm38394	0.013	0.018	-0.004
chr4-147999989-148002213	4.223	0	GATA2.H12CORE.0.PSM.A_GATA2.H12CORE.0.PSM.A	Nppa	0.006	0.011	-0.004
chr4-147999989-148002213	4.223	0	GATA2.H12CORE.0.PSM.A_GATA2.H12CORE.0.PSM.A	Nppa	0.006	0.011	-0.004
chr1-168286680-168288762	-2.937	0.002	GATA2.H12CORE.0.PSM.A_GATA2.H12CORE.0.PSM.A	Lmx1a	0	0.005	-0.004
chr1-168286680-168288762	-2.937	0.002	GATA2.H12CORE.1.P.B_GATA2.H12CORE.1.P.B	Lmx1a	0	0.005	-0.004
chr1-168286680-168288762	-2.937	0.002	GATA2.H12CORE.0.PSM.A_GATA2.H12CORE.0.PSM.A	Lmx1a	0	0.005	-0.004
chr1-168286680-168288762	-2.937	0.002	GATA2.H12CORE.1.P.B_GATA2.H12CORE.1.P.B	Lmx1a	0	0.005	-0.004
chr13-51848591-51849848	-2.554	0.005	GATA2.H12CORE.0.PSM.A_GATA2.H12CORE.0.PSM.A	Nxnl2	0.007	0.011	-0.004
chr13-51848591-51849848	-2.554	0.005	GATA2.H12CORE.0.PSM.A_GATA2.H12CORE.0.PSM.A	Nxnl2	0.007	0.011	-0.004
chr2-29039946-29041718	3.67	0	GATA2.H12CORE.0.PSM.A_GATA2.H12CORE.0.PSM.A	Ntng2	0	0.004	-0.004
chr2-29039946-29041718	3.67	0	GATA2.H12CORE.0.PSM.A_GATA2.H12CORE.0.PSM.A	Ntng2	0	0.004	-0.004
chr1-35941254-35942551	-2.421	0.008	GATA2.H12CORE.0.PSM.A_GATA2.H12CORE.0.PSM.A	Gm38336	0.009	0.013	-0.004
chr1-35941254-35942551	-2.421	0.008	GATA2.H12CORE.1.P.B_GATA2.H12CORE.1.P.B	Gm38336	0.009	0.013	-0.004
chr7-121938187-121940143	3.698	0	GATA2.H12CORE.0.PSM.A_GATA2.H12CORE.0.PSM.A	Gm15489	0	0.004	-0.004
chr7-121938187-121940143	3.698	0	GATA2.H12CORE.1.P.B_GATA2.H12CORE.1.P.B	Gm15489	0	0.004	-0.004
chr2-29039946-29041718	2.813	0.002	GATA2.H12CORE.0.PSM.A_GATA2.H12CORE.0.PSM.A	F730016J06Rik	0	0.004	-0.004
chr2-29039946-29041718	2.813	0.002	GATA2.H12CORE.0.PSM.A_GATA2.H12CORE.0.PSM.A	F730016J06Rik	0	0.004	-0.004
chr15-99663969-99665409	-4.089	0	GATA2.H12CORE.0.PSM.A_GATA2.H12CORE.0.PSM.A	Gm17058	0	0.004	-0.004
chr15-99663969-99665409	-4.089	0	GATA2.H12CORE.1.P.B_GATA2.H12CORE.1.P.B	Gm17058	0	0.004	-0.004
chr15-99663969-99665409	-4.089	0	GATA2.H12CORE.1.P.B_GATA2.H12CORE.1.P.B	Gm17058	0	0.004	-0.004
chr11-116660970-116662402	2.804	0.003	GATA2.H12CORE.1.P.B_GATA2.H12CORE.1.P.B	Rhbdf2	0	0.004	-0.004
chr11-116660970-116662402	2.804	0.003	GATA2.H12CORE.1.P.B_GATA2.H12CORE.1.P.B	Rhbdf2	0	0.004	-0.004
chr3-108432245-108434266	-3.836	0	GATA2.H12CORE.0.PSM.A_GATA2.H12CORE.0.PSM.A	Kcna3	0.001	0.005	-0.003
chr3-108432245-108434266	-3.836	0	GATA2.H12CORE.1.P.B_GATA2.H12CORE.1.P.B	Kcna3	0.001	0.005	-0.003
chr5-31082378-31084563	-3.926	0	GATA2.H12CORE.0.PSM.A_GATA2.H12CORE.0.PSM.A	Khk	0.012	0.016	-0.003
chr5-31082378-31084563	-3.926	0	GATA2.H12CORE.0.PSM.A_GATA2.H12CORE.0.PSM.A	Khk	0.012	0.016	-0.003
chr16-37990318-37991452	3.42	0	GATA2.H12CORE.1.P.B_GATA2.H12CORE.1.P.B	Gtf2e1	0.136	0.14	-0.003
chr16-37990318-37991452	3.42	0	GATA2.H12CORE.1.P.B_GATA2.H12CORE.1.P.B	Gtf2e1	0.136	0.14	-0.003
chr4-147999989-148002213	2.806	0.003	GATA2.H12CORE.0.PSM.A_GATA2.H12CORE.0.PSM.A	Zfp534	0	0.003	-0.003
chr4-147999989-148002213	2.806	0.003	GATA2.H12CORE.0.PSM.A_GATA2.H12CORE.0.PSM.A	Zfp534	0	0.003	-0.003
chr2-26500037-26501126	-2.668	0.004	GATA2.H12CORE.1.P.B_GATA2.H12CORE.1.P.B	Gm13563	0.011	0.014	-0.003
chr14-54430422-54433714	-2.505	0.006	GATA2.H12CORE.0.PSM.A_GATA2.H12CORE.0.PSM.A	Rnf17	0	0.003	-0.003
chr14-54430422-54433714	-2.505	0.006	GATA2.H12CORE.1.P.B_GATA2.H12CORE.1.P.B	Rnf17	0	0.003	-0.003
chr14-54430422-54433714	-2.505	0.006	GATA2.H12CORE.0.PSM.A_GATA2.H12CORE.0.PSM.A	Rnf17	0	0.003	-0.003
chr14-54430422-54433714	-2.505	0.006	GATA2.H12CORE.1.P.B_GATA2.H12CORE.1.P.B	Rnf17	0	0.003	-0.003
chr2-32620779-32621805	-3.139	0.001	GATA2.H12CORE.0.PSM.A_GATA2.H12CORE.0.PSM.A	Golga2	0.159	0.162	-0.003
chr2-32620779-32621805	-3.139	0.001	GATA2.H12CORE.1.P.B_GATA2.H12CORE.1.P.B	Golga2	0.159	0.162	-0.003
chr2-32620779-32621805	-3.139	0.001	GATA2.H12CORE.0.PSM.A_GATA2.H12CORE.0.PSM.A	Golga2	0.159	0.162	-0.003
chr2-32620779-32621805	-3.139	0.001	GATA2.H12CORE.1.P.B_GATA2.H12CORE.1.P.B	Golga2	0.159	0.162	-0.003
chr6-88499320-88500576	-2.555	0.005	GATA2.H12CORE.1.P.B_GATA2.H12CORE.1.P.B	Aplf	0.064	0.067	-0.003
chr6-88499320-88500576	-2.555	0.005	GATA2.H12CORE.1.P.B_GATA2.H12CORE.1.P.B	Aplf	0.064	0.067	-0.003
chr5-130143821-130145428	2.504	0.006	GATA2.H12CORE.1.P.B_GATA2.H12CORE.1.P.B	Tmem132d	0.003	0.006	-0.003
chr5-130143821-130145428	2.504	0.006	GATA2.H12CORE.1.P.B_GATA2.H12CORE.1.P.B	Tmem132d	0.003	0.006	-0.003
chr15-85652611-85654383	4.278	0	GATA2.H12CORE.0.PSM.A_GATA2.H12CORE.0.PSM.A	Gtse1	0	0.003	-0.003
chr15-85652611-85654383	4.278	0	GATA2.H12CORE.1.P.B_GATA2.H12CORE.1.P.B	Gtse1	0	0.003	-0.003
chr15-85652611-85654383	4.278	0	GATA2.H12CORE.0.PSM.A_GATA2.H12CORE.0.PSM.A	Gtse1	0	0.003	-0.003
chr15-85652611-85654383	4.278	0	GATA2.H12CORE.1.P.B_GATA2.H12CORE.1.P.B	Gtse1	0	0.003	-0.003
chr2-33615521-33617065	3.264	0.001	GATA2.H12CORE.1.P.B_GATA2.H12CORE.1.P.B	Gm13403	0	0.003	-0.003
chr2-33615521-33617065	3.264	0.001	GATA2.H12CORE.1.P.B_GATA2.H12CORE.1.P.B	Gm13403	0	0.003	-0.003
chr14-54430422-54433714	-2.473	0.007	GATA2.H12CORE.0.PSM.A_GATA2.H12CORE.0.PSM.A	Ltb4r2	0	0.003	-0.003
chr14-54430422-54433714	-2.473	0.007	GATA2.H12CORE.1.P.B_GATA2.H12CORE.1.P.B	Ltb4r2	0	0.003	-0.003
chr14-54430422-54433714	-2.473	0.007	GATA2.H12CORE.0.PSM.A_GATA2.H12CORE.0.PSM.A	Ltb4r2	0	0.003	-0.003
chr14-54430422-54433714	-2.473	0.007	GATA2.H12CORE.1.P.B_GATA2.H12CORE.1.P.B	Ltb4r2	0	0.003	-0.003
chr8-122719602-122721611	-2.701	0.003	GATA2.H12CORE.0.PSM.A_GATA2.H12CORE.0.PSM.A	Galns	0.023	0.026	-0.003
chr8-122719602-122721611	-2.701	0.003	GATA2.H12CORE.1.P.B_GATA2.H12CORE.1.P.B	Galns	0.023	0.026	-0.003
chr8-122719602-122721611	-2.701	0.003	GATA2.H12CORE.1.P.B_GATA2.H12CORE.1.P.B	Galns	0.023	0.026	-0.003
chr8-122719602-122721611	-2.701	0.003	GATA2.H12CORE.0.PSM.A_GATA2.H12CORE.0.PSM.A	Galns	0.023	0.026	-0.003
chr8-122719602-122721611	-2.701	0.003	GATA2.H12CORE.1.P.B_GATA2.H12CORE.1.P.B	Galns	0.023	0.026	-0.003
chr8-122719602-122721611	-2.701	0.003	GATA2.H12CORE.1.P.B_GATA2.H12CORE.1.P.B	Galns	0.023	0.026	-0.003
chr3-108432245-108434266	3.038	0.001	GATA2.H12CORE.0.PSM.A_GATA2.H12CORE.0.PSM.A	Prok1	0	0.003	-0.003
chr3-108432245-108434266	3.038	0.001	GATA2.H12CORE.1.P.B_GATA2.H12CORE.1.P.B	Prok1	0	0.003	-0.003
chr3-108432245-108434266	3.038	0.001	GATA2.H12CORE.0.PSM.A_GATA2.H12CORE.0.PSM.A	Prok1	0	0.003	-0.003
chr3-108432245-108434266	3.038	0.001	GATA2.H12CORE.1.P.B_GATA2.H12CORE.1.P.B	Prok1	0	0.003	-0.003
chr5-24343787-24345086	-3.2	0.001	GATA2.H12CORE.1.P.B_GATA2.H12CORE.1.P.B	Crygn	0	0.003	-0.003
chr5-24343787-24345086	-3.2	0.001	GATA2.H12CORE.1.P.B_GATA2.H12CORE.1.P.B	Crygn	0	0.003	-0.003
chr5-24601572-24603280	2.401	0.008	GATA2.H12CORE.0.PSM.A_GATA2.H12CORE.0.PSM.A	Crygn	0	0.003	-0.003
chr5-24601572-24603280	2.401	0.008	GATA2.H12CORE.1.P.B_GATA2.H12CORE.1.P.B	Crygn	0	0.003	-0.003
chr5-24601572-24603280	2.401	0.008	GATA2.H12CORE.0.PSM.A_GATA2.H12CORE.0.PSM.A	Crygn	0	0.003	-0.003
chr5-24601572-24603280	2.401	0.008	GATA2.H12CORE.1.P.B_GATA2.H12CORE.1.P.B	Crygn	0	0.003	-0.003
chr3-108432245-108434266	-2.877	0.002	GATA2.H12CORE.0.PSM.A_GATA2.H12CORE.0.PSM.A	Sypl2	0	0.003	-0.003
chr3-108432245-108434266	-2.877	0.002	GATA2.H12CORE.1.P.B_GATA2.H12CORE.1.P.B	Sypl2	0	0.003	-0.003
chr3-108432245-108434266	-2.877	0.002	GATA2.H12CORE.0.PSM.A_GATA2.H12CORE.0.PSM.A	Sypl2	0	0.003	-0.003
chr3-108432245-108434266	-2.877	0.002	GATA2.H12CORE.1.P.B_GATA2.H12CORE.1.P.B	Sypl2	0	0.003	-0.003
chr9-107369329-107370687	-3.006	0.001	GATA2.H12CORE.0.PSM.A_GATA2.H12CORE.0.PSM.A	Dcaf1	0.217	0.219	-0.002
chr9-107369329-107370687	-3.006	0.001	GATA2.H12CORE.1.P.B_GATA2.H12CORE.1.P.B	Dcaf1	0.217	0.219	-0.002
chr9-107369329-107370687	-3.006	0.001	GATA2.H12CORE.0.PSM.A_GATA2.H12CORE.0.PSM.A	Dcaf1	0.217	0.219	-0.002
chr9-107369329-107370687	-3.006	0.001	GATA2.H12CORE.1.P.B_GATA2.H12CORE.1.P.B	Dcaf1	0.217	0.219	-0.002
chr17-24505977-24507557	-2.858	0.002	GATA2.H12CORE.0.PSM.A_GATA2.H12CORE.0.PSM.A	Ift140	0.042	0.045	-0.002
chr17-24505977-24507557	-2.858	0.002	GATA2.H12CORE.1.P.B_GATA2.H12CORE.1.P.B	Ift140	0.042	0.045	-0.002
chr17-24505977-24507557	-2.858	0.002	GATA2.H12CORE.0.PSM.A_GATA2.H12CORE.0.PSM.A	Ift140	0.042	0.045	-0.002
chr17-24505977-24507557	-2.858	0.002	GATA2.H12CORE.1.P.B_GATA2.H12CORE.1.P.B	Ift140	0.042	0.045	-0.002
chr3-108432245-108434266	-6.559	0	GATA2.H12CORE.0.PSM.A_GATA2.H12CORE.0.PSM.A	Slc6a17	0.007	0.009	-0.002
chr3-108432245-108434266	-6.559	0	GATA2.H12CORE.1.P.B_GATA2.H12CORE.1.P.B	Slc6a17	0.007	0.009	-0.002
chr3-108432245-108434266	-6.559	0	GATA2.H12CORE.0.PSM.A_GATA2.H12CORE.0.PSM.A	Slc6a17	0.007	0.009	-0.002
chr3-108432245-108434266	-6.559	0	GATA2.H12CORE.1.P.B_GATA2.H12CORE.1.P.B	Slc6a17	0.007	0.009	-0.002
chr17-56367994-56368766	3.023	0.001	GATA2.H12CORE.0.PSM.A_GATA2.H12CORE.0.PSM.A	Mpnd	0.949	0.951	-0.002
chr17-56367994-56368766	3.023	0.001	GATA2.H12CORE.1.P.B_GATA2.H12CORE.1.P.B	Mpnd	0.949	0.951	-0.002
chr17-56367994-56368766	3.023	0.001	GATA2.H12CORE.0.PSM.A_GATA2.H12CORE.0.PSM.A	Mpnd	0.949	0.951	-0.002
chr17-56367994-56368766	3.023	0.001	GATA2.H12CORE.1.P.B_GATA2.H12CORE.1.P.B	Mpnd	0.949	0.951	-0.002
chr17-56761704-56762622	2.414	0.008	GATA2.H12CORE.0.PSM.A_GATA2.H12CORE.0.PSM.A	Mpnd	0.949	0.951	-0.002
chr17-56761704-56762622	2.414	0.008	GATA2.H12CORE.1.P.B_GATA2.H12CORE.1.P.B	Mpnd	0.949	0.951	-0.002
chr17-56761704-56762622	2.414	0.008	GATA2.H12CORE.0.PSM.A_GATA2.H12CORE.0.PSM.A	Mpnd	0.949	0.951	-0.002
chr17-56761704-56762622	2.414	0.008	GATA2.H12CORE.1.P.B_GATA2.H12CORE.1.P.B	Mpnd	0.949	0.951	-0.002
chr4-47449028-47450664	-2.5	0.006	GATA2.H12CORE.0.PSM.A_GATA2.H12CORE.0.PSM.A	Anks6	0.024	0.026	-0.002
chr4-47449028-47450664	-2.5	0.006	GATA2.H12CORE.1.P.B_GATA2.H12CORE.1.P.B	Anks6	0.024	0.026	-0.002
chr4-47449028-47450664	-2.5	0.006	GATA2.H12CORE.0.PSM.A_GATA2.H12CORE.0.PSM.A	Anks6	0.024	0.026	-0.002
chr4-47449028-47450664	-2.5	0.006	GATA2.H12CORE.1.P.B_GATA2.H12CORE.1.P.B	Anks6	0.024	0.026	-0.002
chr9-107369329-107370687	3.221	0.001	GATA2.H12CORE.0.PSM.A_GATA2.H12CORE.0.PSM.A	6430571L13Rik	0.054	0.056	-0.002
chr9-107369329-107370687	3.221	0.001	GATA2.H12CORE.1.P.B_GATA2.H12CORE.1.P.B	6430571L13Rik	0.054	0.056	-0.002
chr9-107369329-107370687	3.221	0.001	GATA2.H12CORE.0.PSM.A_GATA2.H12CORE.0.PSM.A	6430571L13Rik	0.054	0.056	-0.002
chr9-107369329-107370687	3.221	0.001	GATA2.H12CORE.1.P.B_GATA2.H12CORE.1.P.B	6430571L13Rik	0.054	0.056	-0.002
chr9-61110890-61112484	-3.259	0.001	GATA2.H12CORE.0.PSM.A_GATA2.H12CORE.0.PSM.A	Gm10655	0	0.002	-0.002
chr12-80061772-80063302	-4.148	0	GATA2.H12CORE.1.P.B_GATA2.H12CORE.1.P.B	Ttc9	0.095	0.097	-0.002
chr12-80061772-80063302	-4.148	0	GATA2.H12CORE.1.P.B_GATA2.H12CORE.1.P.B	Ttc9	0.095	0.097	-0.002
chr4-140188494-140189261	-2.496	0.006	GATA2.H12CORE.0.PSM.A_GATA2.H12CORE.0.PSM.A	Padi4	0.004	0.006	-0.002
chr4-140188494-140189261	-2.496	0.006	GATA2.H12CORE.0.PSM.A_GATA2.H12CORE.0.PSM.A	Padi4	0.004	0.006	-0.002
chr4-140188494-140189261	-2.496	0.006	GATA2.H12CORE.1.P.B_GATA2.H12CORE.1.P.B	Padi4	0.004	0.006	-0.002
chr4-140188494-140189261	-2.496	0.006	GATA2.H12CORE.1.P.B_GATA2.H12CORE.1.P.B	Padi4	0.004	0.006	-0.002
chr4-140188494-140189261	-2.496	0.006	GATA2.H12CORE.0.PSM.A_GATA2.H12CORE.0.PSM.A	Padi4	0.004	0.006	-0.002
chr4-140188494-140189261	-2.496	0.006	GATA2.H12CORE.0.PSM.A_GATA2.H12CORE.0.PSM.A	Padi4	0.004	0.006	-0.002
chr4-140188494-140189261	-2.496	0.006	GATA2.H12CORE.1.P.B_GATA2.H12CORE.1.P.B	Padi4	0.004	0.006	-0.002
chr4-140188494-140189261	-2.496	0.006	GATA2.H12CORE.1.P.B_GATA2.H12CORE.1.P.B	Padi4	0.004	0.006	-0.002
chr1-132738799-132739614	2.332	0.01	GATA2.H12CORE.1.P.B_GATA2.H12CORE.1.P.B	Tmem81	0.005	0.007	-0.002
chr1-132738799-132739614	2.332	0.01	GATA2.H12CORE.1.P.B_GATA2.H12CORE.1.P.B	Tmem81	0.005	0.007	-0.002
chr1-133491895-133493784	-3.682	0	GATA2.H12CORE.0.PSM.A_GATA2.H12CORE.0.PSM.A	Tmem81	0.005	0.007	-0.002
chr1-133491895-133493784	-3.682	0	GATA2.H12CORE.0.PSM.A_GATA2.H12CORE.0.PSM.A	Tmem81	0.005	0.007	-0.002
chr8-84729810-84732148	3.014	0.001	GATA2.H12CORE.0.PSM.A_GATA2.H12CORE.0.PSM.A	Klf1	0	0.002	-0.002
chr8-84729810-84732148	3.014	0.001	GATA2.H12CORE.1.P.B_GATA2.H12CORE.1.P.B	Klf1	0	0.002	-0.002
chr8-84729810-84732148	3.014	0.001	GATA2.H12CORE.1.P.B_GATA2.H12CORE.1.P.B	Klf1	0	0.002	-0.002
chr8-84729810-84732148	3.014	0.001	GATA2.H12CORE.0.PSM.A_GATA2.H12CORE.0.PSM.A	Klf1	0	0.002	-0.002
chr8-84729810-84732148	3.014	0.001	GATA2.H12CORE.1.P.B_GATA2.H12CORE.1.P.B	Klf1	0	0.002	-0.002
chr8-84729810-84732148	3.014	0.001	GATA2.H12CORE.1.P.B_GATA2.H12CORE.1.P.B	Klf1	0	0.002	-0.002
chr9-107722761-107724418	3.176	0.001	GATA2.H12CORE.0.PSM.A_GATA2.H12CORE.0.PSM.A	Zmynd10	0.002	0.004	-0.002
chr9-107722761-107724418	3.176	0.001	GATA2.H12CORE.1.P.B_GATA2.H12CORE.1.P.B	Zmynd10	0.002	0.004	-0.002
chr9-107722761-107724418	3.176	0.001	GATA2.H12CORE.1.P.B_GATA2.H12CORE.1.P.B	Zmynd10	0.002	0.004	-0.002
chr9-107722761-107724418	3.176	0.001	GATA2.H12CORE.0.PSM.A_GATA2.H12CORE.0.PSM.A	Zmynd10	0.002	0.004	-0.002
chr9-107722761-107724418	3.176	0.001	GATA2.H12CORE.1.P.B_GATA2.H12CORE.1.P.B	Zmynd10	0.002	0.004	-0.002
chr9-107722761-107724418	3.176	0.001	GATA2.H12CORE.1.P.B_GATA2.H12CORE.1.P.B	Zmynd10	0.002	0.004	-0.002
chr8-84729810-84732148	-4.202	0	GATA2.H12CORE.0.PSM.A_GATA2.H12CORE.0.PSM.A	Gm10645	0.006	0.007	-0.002
chr8-84729810-84732148	-4.202	0	GATA2.H12CORE.1.P.B_GATA2.H12CORE.1.P.B	Gm10645	0.006	0.007	-0.002
chr8-84729810-84732148	-4.202	0	GATA2.H12CORE.1.P.B_GATA2.H12CORE.1.P.B	Gm10645	0.006	0.007	-0.002
chr2-26500037-26501126	3.294	0	GATA2.H12CORE.1.P.B_GATA2.H12CORE.1.P.B	AA543186	0.009	0.01	-0.002
chr2-26500037-26501126	3.294	0	GATA2.H12CORE.1.P.B_GATA2.H12CORE.1.P.B	AA543186	0.009	0.01	-0.002
chr2-33615521-33617065	-5.15	0	GATA2.H12CORE.1.P.B_GATA2.H12CORE.1.P.B	Naif1	0.012	0.014	-0.002
chr2-33615521-33617065	-5.15	0	GATA2.H12CORE.1.P.B_GATA2.H12CORE.1.P.B	Naif1	0.012	0.014	-0.002
chr6-88226241-88227173	-2.54	0.006	GATA2.H12CORE.0.PSM.A_GATA2.H12CORE.0.PSM.A	1810020O05Rik	0	0.002	-0.002
chr6-88226241-88227173	-2.54	0.006	GATA2.H12CORE.1.P.B_GATA2.H12CORE.1.P.B	1810020O05Rik	0	0.002	-0.002
chr6-88226241-88227173	-2.54	0.006	GATA2.H12CORE.0.PSM.A_GATA2.H12CORE.0.PSM.A	1810020O05Rik	0	0.002	-0.002
chr6-88226241-88227173	-2.54	0.006	GATA2.H12CORE.1.P.B_GATA2.H12CORE.1.P.B	1810020O05Rik	0	0.002	-0.002
chr5-42066968-42068691	4.011	0	GATA2.H12CORE.0.PSM.A_GATA2.H12CORE.0.PSM.A	Gm16223	0.023	0.024	-0.001
chr5-42066968-42068691	4.011	0	GATA2.H12CORE.1.P.B_GATA2.H12CORE.1.P.B	Gm16223	0.023	0.024	-0.001
chr5-42066968-42068691	4.011	0	GATA2.H12CORE.1.P.B_GATA2.H12CORE.1.P.B	Gm16223	0.023	0.024	-0.001
chr5-42066968-42068691	4.011	0	GATA2.H12CORE.0.PSM.A_GATA2.H12CORE.0.PSM.A	Gm16223	0.023	0.024	-0.001
chr5-42066968-42068691	4.011	0	GATA2.H12CORE.1.P.B_GATA2.H12CORE.1.P.B	Gm16223	0.023	0.024	-0.001
chr5-42066968-42068691	4.011	0	GATA2.H12CORE.1.P.B_GATA2.H12CORE.1.P.B	Gm16223	0.023	0.024	-0.001
chr7-109114530-109116326	3.877	0	GATA2.H12CORE.0.PSM.A_GATA2.H12CORE.0.PSM.A	Hpx	0.003	0.004	-0.001
chr7-109114530-109116326	3.877	0	GATA2.H12CORE.1.P.B_GATA2.H12CORE.1.P.B	Hpx	0.003	0.004	-0.001
chr7-109114530-109116326	3.877	0	GATA2.H12CORE.1.P.B_GATA2.H12CORE.1.P.B	Hpx	0.003	0.004	-0.001
chr7-109114530-109116326	3.877	0	GATA2.H12CORE.0.PSM.A_GATA2.H12CORE.0.PSM.A	Hpx	0.003	0.004	-0.001
chr7-109114530-109116326	3.877	0	GATA2.H12CORE.1.P.B_GATA2.H12CORE.1.P.B	Hpx	0.003	0.004	-0.001
chr7-109114530-109116326	3.877	0	GATA2.H12CORE.1.P.B_GATA2.H12CORE.1.P.B	Hpx	0.003	0.004	-0.001
chr7-109190630-109192251	2.332	0.01	GATA2.H12CORE.0.PSM.A_GATA2.H12CORE.0.PSM.A	Hpx	0.003	0.004	-0.001
chr7-109190630-109192251	2.332	0.01	GATA2.H12CORE.0.PSM.A_GATA2.H12CORE.0.PSM.A	Hpx	0.003	0.004	-0.001
chr18-35814237-35816482	3.234	0.001	GATA2.H12CORE.0.PSM.A_GATA2.H12CORE.0.PSM.A	Gm5239	0.002	0.003	-0.001
chr18-35814237-35816482	3.234	0.001	GATA2.H12CORE.1.P.B_GATA2.H12CORE.1.P.B	Gm5239	0.002	0.003	-0.001
chr18-35814237-35816482	3.234	0.001	GATA2.H12CORE.1.P.B_GATA2.H12CORE.1.P.B	Gm5239	0.002	0.003	-0.001
chr10-60193379-60195507	4.63	0	GATA2.H12CORE.1.P.B_GATA2.H12CORE.1.P.B	Anapc16	1.303	1.304	-0.001
chr10-60193379-60195507	4.63	0	GATA2.H12CORE.1.P.B_GATA2.H12CORE.1.P.B	Anapc16	1.303	1.304	-0.001
chr2-33615521-33617065	5.203	0	GATA2.H12CORE.1.P.B_GATA2.H12CORE.1.P.B	Nron	0.002	0.003	-0.001
chr9-57505347-57506328	2.672	0.004	GATA2.H12CORE.0.PSM.A_GATA2.H12CORE.0.PSM.A	Scamp5	0.265	0.266	-0.001
chr9-57505347-57506328	2.672	0.004	GATA2.H12CORE.1.P.B_GATA2.H12CORE.1.P.B	Scamp5	0.265	0.266	-0.001
chr9-57505347-57506328	2.672	0.004	GATA2.H12CORE.0.PSM.A_GATA2.H12CORE.0.PSM.A	Scamp5	0.265	0.266	-0.001
chr9-57505347-57506328	2.672	0.004	GATA2.H12CORE.1.P.B_GATA2.H12CORE.1.P.B	Scamp5	0.265	0.266	-0.001
chr17-56761704-56762622	2.606	0.005	GATA2.H12CORE.0.PSM.A_GATA2.H12CORE.0.PSM.A	Catsperd	0.004	0.005	-0.001
chr17-56761704-56762622	2.606	0.005	GATA2.H12CORE.1.P.B_GATA2.H12CORE.1.P.B	Catsperd	0.004	0.005	-0.001
chr17-56761704-56762622	2.606	0.005	GATA2.H12CORE.0.PSM.A_GATA2.H12CORE.0.PSM.A	Catsperd	0.004	0.005	-0.001
chr17-56761704-56762622	2.606	0.005	GATA2.H12CORE.1.P.B_GATA2.H12CORE.1.P.B	Catsperd	0.004	0.005	-0.001
chr2-33615521-33617065	-3.809	0	GATA2.H12CORE.1.P.B_GATA2.H12CORE.1.P.B	Ciz1	0.23	0.231	-0.001
chr2-33615521-33617065	-3.809	0	GATA2.H12CORE.1.P.B_GATA2.H12CORE.1.P.B	Ciz1	0.23	0.231	-0.001
chr9-107369329-107370687	-2.601	0.005	GATA2.H12CORE.0.PSM.A_GATA2.H12CORE.0.PSM.A	Sema3b	0.003	0.004	-0.001
chr9-107369329-107370687	-2.601	0.005	GATA2.H12CORE.1.P.B_GATA2.H12CORE.1.P.B	Sema3b	0.003	0.004	-0.001
chr9-107369329-107370687	-2.601	0.005	GATA2.H12CORE.0.PSM.A_GATA2.H12CORE.0.PSM.A	Sema3b	0.003	0.004	-0.001
chr9-107369329-107370687	-2.601	0.005	GATA2.H12CORE.1.P.B_GATA2.H12CORE.1.P.B	Sema3b	0.003	0.004	-0.001
chr4-109224475-109225927	-3.661	0	GATA2.H12CORE.0.PSM.A_GATA2.H12CORE.0.PSM.A	Ttc39a	0.002	0.002	0
chr4-109224475-109225927	-3.661	0	GATA2.H12CORE.1.P.B_GATA2.H12CORE.1.P.B	Ttc39a	0.002	0.002	0
chr4-109224475-109225927	-3.661	0	GATA2.H12CORE.0.PSM.A_GATA2.H12CORE.0.PSM.A	Ttc39a	0.002	0.002	0
chr4-109224475-109225927	-3.661	0	GATA2.H12CORE.1.P.B_GATA2.H12CORE.1.P.B	Ttc39a	0.002	0.002	0
chr11-84568349-84571029	-2.578	0.005	GATA2.H12CORE.0.PSM.A_GATA2.H12CORE.0.PSM.A	Gm11444	0.008	0.008	0
chr11-84568349-84571029	-2.578	0.005	GATA2.H12CORE.1.P.B_GATA2.H12CORE.1.P.B	Gm11444	0.008	0.008	0
chr11-84568349-84571029	-2.578	0.005	GATA2.H12CORE.0.PSM.A_GATA2.H12CORE.0.PSM.A	Gm11444	0.008	0.008	0
chr11-84568349-84571029	-2.578	0.005	GATA2.H12CORE.1.P.B_GATA2.H12CORE.1.P.B	Gm11444	0.008	0.008	0
chr6-88189264-88191083	-2.337	0.01	GATA2.H12CORE.0.PSM.A_GATA2.H12CORE.0.PSM.A	Antxr1	0.002	0.003	0
chr6-88189264-88191083	-2.337	0.01	GATA2.H12CORE.0.PSM.A_GATA2.H12CORE.0.PSM.A	Antxr1	0.002	0.003	0
chr6-88189264-88191083	-2.337	0.01	GATA2.H12CORE.0.PSM.A_GATA2.H12CORE.0.PSM.A	Antxr1	0.002	0.003	0
chr6-88189264-88191083	-2.337	0.01	GATA2.H12CORE.1.P.B_GATA2.H12CORE.1.P.B	Antxr1	0.002	0.003	0
chr6-88189264-88191083	-2.337	0.01	GATA2.H12CORE.1.P.B_GATA2.H12CORE.1.P.B	Antxr1	0.002	0.003	0
chr6-88189264-88191083	-2.337	0.01	GATA2.H12CORE.1.P.B_GATA2.H12CORE.1.P.B	Antxr1	0.002	0.003	0
chr6-88189264-88191083	-2.337	0.01	GATA2.H12CORE.1.P.B_GATA2.H12CORE.1.P.B	Antxr1	0.002	0.003	0
chr6-88189264-88191083	-2.337	0.01	GATA2.H12CORE.1.P.B_GATA2.H12CORE.1.P.B	Antxr1	0.002	0.003	0
chr6-88189264-88191083	-2.337	0.01	GATA2.H12CORE.0.PSM.A_GATA2.H12CORE.0.PSM.A	Antxr1	0.002	0.003	0
chr6-88189264-88191083	-2.337	0.01	GATA2.H12CORE.0.PSM.A_GATA2.H12CORE.0.PSM.A	Antxr1	0.002	0.003	0
chr6-88189264-88191083	-2.337	0.01	GATA2.H12CORE.0.PSM.A_GATA2.H12CORE.0.PSM.A	Antxr1	0.002	0.003	0
chr6-88189264-88191083	-2.337	0.01	GATA2.H12CORE.1.P.B_GATA2.H12CORE.1.P.B	Antxr1	0.002	0.003	0
chr6-88189264-88191083	-2.337	0.01	GATA2.H12CORE.1.P.B_GATA2.H12CORE.1.P.B	Antxr1	0.002	0.003	0
chr6-88189264-88191083	-2.337	0.01	GATA2.H12CORE.1.P.B_GATA2.H12CORE.1.P.B	Antxr1	0.002	0.003	0
chr6-88189264-88191083	-2.337	0.01	GATA2.H12CORE.1.P.B_GATA2.H12CORE.1.P.B	Antxr1	0.002	0.003	0
chr6-88189264-88191083	-2.337	0.01	GATA2.H12CORE.1.P.B_GATA2.H12CORE.1.P.B	Antxr1	0.002	0.003	0
chr2-26500037-26501126	2.652	0.004	GATA2.H12CORE.1.P.B_GATA2.H12CORE.1.P.B	Gm38287	0.001	0.001	0
chr17-56761704-56762622	-2.335	0.01	GATA2.H12CORE.0.PSM.A_GATA2.H12CORE.0.PSM.A	Uhrf1	0.023	0.023	0
chr17-56761704-56762622	-2.335	0.01	GATA2.H12CORE.1.P.B_GATA2.H12CORE.1.P.B	Uhrf1	0.023	0.023	0
chr17-56761704-56762622	-2.335	0.01	GATA2.H12CORE.0.PSM.A_GATA2.H12CORE.0.PSM.A	Uhrf1	0.023	0.023	0
chr17-56761704-56762622	-2.335	0.01	GATA2.H12CORE.1.P.B_GATA2.H12CORE.1.P.B	Uhrf1	0.023	0.023	0
chr4-109224475-109225927	-2.41	0.008	GATA2.H12CORE.0.PSM.A_GATA2.H12CORE.0.PSM.A	Gm17354	0.025	0.026	0
chr4-109224475-109225927	-2.41	0.008	GATA2.H12CORE.1.P.B_GATA2.H12CORE.1.P.B	Gm17354	0.025	0.026	0
chr4-109224475-109225927	-2.41	0.008	GATA2.H12CORE.0.PSM.A_GATA2.H12CORE.0.PSM.A	Gm17354	0.025	0.026	0
chr4-109224475-109225927	-2.41	0.008	GATA2.H12CORE.1.P.B_GATA2.H12CORE.1.P.B	Gm17354	0.025	0.026	0
chr6-50890150-50891937	2.853	0.002	GATA2.H12CORE.0.PSM.A_GATA2.H12CORE.0.PSM.A	Tra2a	1.76	1.761	0
chr6-50890150-50891937	2.853	0.002	GATA2.H12CORE.0.PSM.A_GATA2.H12CORE.0.PSM.A	Tra2a	1.76	1.761	0
chr6-50890150-50891937	2.853	0.002	GATA2.H12CORE.1.P.B_GATA2.H12CORE.1.P.B	Tra2a	1.76	1.761	0
chr6-50890150-50891937	2.853	0.002	GATA2.H12CORE.1.P.B_GATA2.H12CORE.1.P.B	Tra2a	1.76	1.761	0
chr6-50890150-50891937	2.853	0.002	GATA2.H12CORE.1.P.B_GATA2.H12CORE.1.P.B	Tra2a	1.76	1.761	0
chr6-50890150-50891937	2.853	0.002	GATA2.H12CORE.0.PSM.A_GATA2.H12CORE.0.PSM.A	Tra2a	1.76	1.761	0
chr6-50890150-50891937	2.853	0.002	GATA2.H12CORE.0.PSM.A_GATA2.H12CORE.0.PSM.A	Tra2a	1.76	1.761	0
chr6-50890150-50891937	2.853	0.002	GATA2.H12CORE.1.P.B_GATA2.H12CORE.1.P.B	Tra2a	1.76	1.761	0
chr6-50890150-50891937	2.853	0.002	GATA2.H12CORE.1.P.B_GATA2.H12CORE.1.P.B	Tra2a	1.76	1.761	0
chr6-50890150-50891937	2.853	0.002	GATA2.H12CORE.1.P.B_GATA2.H12CORE.1.P.B	Tra2a	1.76	1.761	0
chr1-157054283-157056162	3.362	0	GATA2.H12CORE.0.PSM.A_GATA2.H12CORE.0.PSM.A	Abl2	0.134	0.134	0
chr1-157054283-157056162	3.362	0	GATA2.H12CORE.1.P.B_GATA2.H12CORE.1.P.B	Abl2	0.134	0.134	0
chr1-157054283-157056162	3.362	0	GATA2.H12CORE.0.PSM.A_GATA2.H12CORE.0.PSM.A	Abl2	0.134	0.134	0
chr1-157054283-157056162	3.362	0	GATA2.H12CORE.1.P.B_GATA2.H12CORE.1.P.B	Abl2	0.134	0.134	0
chr2-26500037-26501126	2.451	0.007	GATA2.H12CORE.1.P.B_GATA2.H12CORE.1.P.B	Adamtsl2	0.004	0.004	0
chr2-26500037-26501126	2.451	0.007	GATA2.H12CORE.1.P.B_GATA2.H12CORE.1.P.B	Adamtsl2	0.004	0.004	0
chr4-23982500-23984251	-3.512	0	GATA2.H12CORE.1.P.B_GATA2.H12CORE.1.P.B	Fbxl4	0.069	0.069	0
chr4-23982500-23984251	-3.512	0	GATA2.H12CORE.1.P.B_GATA2.H12CORE.1.P.B	Fbxl4	0.069	0.069	0
chr12-80061772-80063302	2.696	0.004	GATA2.H12CORE.1.P.B_GATA2.H12CORE.1.P.B	Cox16	0.293	0.293	0
chr12-80061772-80063302	2.696	0.004	GATA2.H12CORE.1.P.B_GATA2.H12CORE.1.P.B	Cox16	0.293	0.293	0
chr3-108432245-108434266	-3.403	0	GATA2.H12CORE.0.PSM.A_GATA2.H12CORE.0.PSM.A	Atxn7l2	0.268	0.268	0
chr3-108432245-108434266	-3.403	0	GATA2.H12CORE.1.P.B_GATA2.H12CORE.1.P.B	Atxn7l2	0.268	0.268	0
chr3-108432245-108434266	-3.403	0	GATA2.H12CORE.0.PSM.A_GATA2.H12CORE.0.PSM.A	Atxn7l2	0.268	0.268	0
chr3-108432245-108434266	-3.403	0	GATA2.H12CORE.1.P.B_GATA2.H12CORE.1.P.B	Atxn7l2	0.268	0.268	0
chr12-54286666-54289024	3.57	0	GATA2.H12CORE.1.P.B_GATA2.H12CORE.1.P.B	Egln3	0.005	0.004	0
chr12-54286666-54289024	3.57	0	GATA2.H12CORE.1.P.B_GATA2.H12CORE.1.P.B	Egln3	0.005	0.004	0
chr17-15371714-15372354	2.769	0.003	GATA2.H12CORE.0.PSM.A_GATA2.H12CORE.0.PSM.A	Gm3448	0.041	0.04	0.001
chr17-15371714-15372354	2.769	0.003	GATA2.H12CORE.1.P.B_GATA2.H12CORE.1.P.B	Gm3448	0.041	0.04	0.001
chr17-15371714-15372354	2.769	0.003	GATA2.H12CORE.0.PSM.A_GATA2.H12CORE.0.PSM.A	Gm3448	0.041	0.04	0.001
chr17-15371714-15372354	2.769	0.003	GATA2.H12CORE.1.P.B_GATA2.H12CORE.1.P.B	Gm3448	0.041	0.04	0.001
chr16-5536240-5537519	-2.33	0.01	GATA2.H12CORE.1.P.B_GATA2.H12CORE.1.P.B	Nagpa	0.056	0.055	0.001
chr16-5536240-5537519	-2.33	0.01	GATA2.H12CORE.1.P.B_GATA2.H12CORE.1.P.B	Nagpa	0.056	0.055	0.001
chr1-75448932-75450868	-2.613	0.004	GATA2.H12CORE.0.PSM.A_GATA2.H12CORE.0.PSM.A	Tuba4a	0.004	0.004	0.001
chr1-75448932-75450868	-2.613	0.004	GATA2.H12CORE.1.P.B_GATA2.H12CORE.1.P.B	Tuba4a	0.004	0.004	0.001
chr1-75448932-75450868	-2.613	0.004	GATA2.H12CORE.0.PSM.A_GATA2.H12CORE.0.PSM.A	Tuba4a	0.004	0.004	0.001
chr1-75448932-75450868	-2.613	0.004	GATA2.H12CORE.1.P.B_GATA2.H12CORE.1.P.B	Tuba4a	0.004	0.004	0.001
chr2-33615521-33617065	4.495	0	GATA2.H12CORE.1.P.B_GATA2.H12CORE.1.P.B	Slc25a25	0.282	0.282	0.001
chr2-33615521-33617065	4.495	0	GATA2.H12CORE.1.P.B_GATA2.H12CORE.1.P.B	Slc25a25	0.282	0.282	0.001
chr12-80061772-80063302	4.215	0	GATA2.H12CORE.1.P.B_GATA2.H12CORE.1.P.B	Gm26669	0.003	0.002	0.001
chr12-80061772-80063302	4.215	0	GATA2.H12CORE.1.P.B_GATA2.H12CORE.1.P.B	Gm26669	0.003	0.002	0.001
chr5-125151539-125152476	2.667	0.004	GATA2.H12CORE.0.PSM.A_GATA2.H12CORE.0.PSM.A	Fzd10	0.003	0.002	0.001
chr5-125151539-125152476	2.667	0.004	GATA2.H12CORE.1.P.B_GATA2.H12CORE.1.P.B	Fzd10	0.003	0.002	0.001
chr4-115056171-115058012	3.204	0.001	GATA2.H12CORE.0.PSM.A_GATA2.H12CORE.0.PSM.A	Cyp4x1os	0.001	0	0.001
chr4-115056171-115058012	3.204	0.001	GATA2.H12CORE.1.P.B_GATA2.H12CORE.1.P.B	Cyp4x1os	0.001	0	0.001
chr15-85652611-85654383	3.924	0	GATA2.H12CORE.0.PSM.A_GATA2.H12CORE.0.PSM.A	Ribc2	0.001	0	0.001
chr15-85652611-85654383	3.924	0	GATA2.H12CORE.1.P.B_GATA2.H12CORE.1.P.B	Ribc2	0.001	0	0.001
chr15-85652611-85654383	3.924	0	GATA2.H12CORE.0.PSM.A_GATA2.H12CORE.0.PSM.A	Ribc2	0.001	0	0.001
chr15-85652611-85654383	3.924	0	GATA2.H12CORE.1.P.B_GATA2.H12CORE.1.P.B	Ribc2	0.001	0	0.001
chr7-30532717-30533299	2.584	0.005	GATA2.H12CORE.0.PSM.A_GATA2.H12CORE.0.PSM.A	Wdr62	0.01	0.009	0.001
chr7-30532717-30533299	2.584	0.005	GATA2.H12CORE.0.PSM.A_GATA2.H12CORE.0.PSM.A	Wdr62	0.01	0.009	0.001
chr15-99663969-99665409	4.489	0	GATA2.H12CORE.0.PSM.A_GATA2.H12CORE.0.PSM.A	Gm17349	0.001	0	0.001
chr15-99663969-99665409	4.489	0	GATA2.H12CORE.1.P.B_GATA2.H12CORE.1.P.B	Gm17349	0.001	0	0.001
chr15-99663969-99665409	4.489	0	GATA2.H12CORE.1.P.B_GATA2.H12CORE.1.P.B	Gm17349	0.001	0	0.001
chr15-99663969-99665409	4.489	0	GATA2.H12CORE.0.PSM.A_GATA2.H12CORE.0.PSM.A	Gm17349	0.001	0	0.001
chr15-99663969-99665409	4.489	0	GATA2.H12CORE.1.P.B_GATA2.H12CORE.1.P.B	Gm17349	0.001	0	0.001
chr15-99663969-99665409	4.489	0	GATA2.H12CORE.1.P.B_GATA2.H12CORE.1.P.B	Gm17349	0.001	0	0.001
chr5-139681520-139683179	2.496	0.006	GATA2.H12CORE.1.P.B_GATA2.H12CORE.1.P.B	Gm16121	0.003	0.002	0.001
chr7-30955563-30957773	3.026	0.001	GATA2.H12CORE.1.P.B_GATA2.H12CORE.1.P.B	Nphs1	0.004	0.003	0.001
chr7-30955563-30957773	3.026	0.001	GATA2.H12CORE.1.P.B_GATA2.H12CORE.1.P.B	Nphs1	0.004	0.003	0.001
chr7-99474023-99475435	-2.882	0.002	GATA2.H12CORE.1.P.B_GATA2.H12CORE.1.P.B	Olfr552	0.001	0	0.001
chr16-33605399-33607413	2.486	0.006	GATA2.H12CORE.0.PSM.A_GATA2.H12CORE.0.PSM.A	Slc12a8	0.008	0.007	0.001
chr16-33605399-33607413	2.486	0.006	GATA2.H12CORE.0.PSM.A_GATA2.H12CORE.0.PSM.A	Slc12a8	0.008	0.007	0.001
chr5-115431053-115432040	2.414	0.008	GATA2.H12CORE.0.PSM.A_GATA2.H12CORE.0.PSM.A	Pxn	0.07	0.069	0.001
chr5-115431053-115432040	2.414	0.008	GATA2.H12CORE.1.P.B_GATA2.H12CORE.1.P.B	Pxn	0.07	0.069	0.001
chr5-115431053-115432040	2.414	0.008	GATA2.H12CORE.0.PSM.A_GATA2.H12CORE.0.PSM.A	Pxn	0.07	0.069	0.001
chr5-115431053-115432040	2.414	0.008	GATA2.H12CORE.1.P.B_GATA2.H12CORE.1.P.B	Pxn	0.07	0.069	0.001
chr14-54430422-54433714	3.267	0.001	GATA2.H12CORE.0.PSM.A_GATA2.H12CORE.0.PSM.A	Homez	0.026	0.024	0.001
chr14-54430422-54433714	3.267	0.001	GATA2.H12CORE.1.P.B_GATA2.H12CORE.1.P.B	Homez	0.026	0.024	0.001
chr14-54430422-54433714	3.267	0.001	GATA2.H12CORE.0.PSM.A_GATA2.H12CORE.0.PSM.A	Homez	0.026	0.024	0.001
chr14-54430422-54433714	3.267	0.001	GATA2.H12CORE.1.P.B_GATA2.H12CORE.1.P.B	Homez	0.026	0.024	0.001
chr12-112163716-112164983	-2.976	0.001	GATA2.H12CORE.0.PSM.A_GATA2.H12CORE.0.PSM.A	Nudt14	0.19	0.189	0.002
chr12-112163716-112164983	-2.976	0.001	GATA2.H12CORE.0.PSM.A_GATA2.H12CORE.0.PSM.A	Nudt14	0.19	0.189	0.002
chr12-112163716-112164983	-2.976	0.001	GATA2.H12CORE.1.P.B_GATA2.H12CORE.1.P.B	Nudt14	0.19	0.189	0.002
chr12-112163716-112164983	-2.976	0.001	GATA2.H12CORE.0.PSM.A_GATA2.H12CORE.0.PSM.A	Nudt14	0.19	0.189	0.002
chr12-112163716-112164983	-2.976	0.001	GATA2.H12CORE.0.PSM.A_GATA2.H12CORE.0.PSM.A	Nudt14	0.19	0.189	0.002
chr12-112163716-112164983	-2.976	0.001	GATA2.H12CORE.1.P.B_GATA2.H12CORE.1.P.B	Nudt14	0.19	0.189	0.002
chr17-34591473-34593464	2.475	0.007	GATA2.H12CORE.1.P.B_GATA2.H12CORE.1.P.B	Gm20463	0.002	0	0.002
chr2-26500037-26501126	4.019	0	GATA2.H12CORE.1.P.B_GATA2.H12CORE.1.P.B	Snapc4	0.067	0.066	0.002
chr2-26500037-26501126	4.019	0	GATA2.H12CORE.1.P.B_GATA2.H12CORE.1.P.B	Snapc4	0.067	0.066	0.002
chr1-168286680-168288762	-2.465	0.007	GATA2.H12CORE.0.PSM.A_GATA2.H12CORE.0.PSM.A	Rxrg	0.002	0	0.002
chr1-168286680-168288762	-2.465	0.007	GATA2.H12CORE.1.P.B_GATA2.H12CORE.1.P.B	Rxrg	0.002	0	0.002
chr1-168286680-168288762	-2.465	0.007	GATA2.H12CORE.0.PSM.A_GATA2.H12CORE.0.PSM.A	Rxrg	0.002	0	0.002
chr1-168286680-168288762	-2.465	0.007	GATA2.H12CORE.1.P.B_GATA2.H12CORE.1.P.B	Rxrg	0.002	0	0.002
chr17-45873029-45874385	3.824	0	GATA2.H12CORE.0.PSM.A_GATA2.H12CORE.0.PSM.A	Capn11	0.002	0	0.002
chr17-45873029-45874385	3.824	0	GATA2.H12CORE.0.PSM.A_GATA2.H12CORE.0.PSM.A	Capn11	0.002	0	0.002
chr5-31086447-31087076	2.587	0.005	GATA2.H12CORE.1.P.B_GATA2.H12CORE.1.P.B	Atraid	0.958	0.956	0.002
chr5-31086447-31087076	2.587	0.005	GATA2.H12CORE.1.P.B_GATA2.H12CORE.1.P.B	Atraid	0.958	0.956	0.002
chr1-6728943-6730158	2.631	0.004	GATA2.H12CORE.0.PSM.A_GATA2.H12CORE.0.PSM.A	Oprk1	0.005	0.003	0.002
chr1-6728943-6730158	2.631	0.004	GATA2.H12CORE.1.P.B_GATA2.H12CORE.1.P.B	Oprk1	0.005	0.003	0.002
chr1-6728943-6730158	2.631	0.004	GATA2.H12CORE.1.P.B_GATA2.H12CORE.1.P.B	Oprk1	0.005	0.003	0.002
chr1-6728943-6730158	2.631	0.004	GATA2.H12CORE.0.PSM.A_GATA2.H12CORE.0.PSM.A	Oprk1	0.005	0.003	0.002
chr1-6728943-6730158	2.631	0.004	GATA2.H12CORE.1.P.B_GATA2.H12CORE.1.P.B	Oprk1	0.005	0.003	0.002
chr1-6728943-6730158	2.631	0.004	GATA2.H12CORE.1.P.B_GATA2.H12CORE.1.P.B	Oprk1	0.005	0.003	0.002
chr15-99636844-99638249	2.606	0.005	GATA2.H12CORE.0.PSM.A_GATA2.H12CORE.0.PSM.A	Kcnh3	0.003	0.001	0.002
chr15-99636844-99638249	2.606	0.005	GATA2.H12CORE.1.P.B_GATA2.H12CORE.1.P.B	Kcnh3	0.003	0.001	0.002
chr15-99636844-99638249	2.606	0.005	GATA2.H12CORE.0.PSM.A_GATA2.H12CORE.0.PSM.A	Kcnh3	0.003	0.001	0.002
chr15-99636844-99638249	2.606	0.005	GATA2.H12CORE.1.P.B_GATA2.H12CORE.1.P.B	Kcnh3	0.003	0.001	0.002
chr14-54430422-54433714	2.483	0.007	GATA2.H12CORE.0.PSM.A_GATA2.H12CORE.0.PSM.A	Parp4	0.002	0	0.002
chr14-54430422-54433714	2.483	0.007	GATA2.H12CORE.1.P.B_GATA2.H12CORE.1.P.B	Parp4	0.002	0	0.002
chr14-54430422-54433714	2.483	0.007	GATA2.H12CORE.0.PSM.A_GATA2.H12CORE.0.PSM.A	Parp4	0.002	0	0.002
chr14-54430422-54433714	2.483	0.007	GATA2.H12CORE.1.P.B_GATA2.H12CORE.1.P.B	Parp4	0.002	0	0.002
chr9-107369329-107370687	3.368	0	GATA2.H12CORE.0.PSM.A_GATA2.H12CORE.0.PSM.A	4921523L03Rik	0.002	0	0.002
chr9-107369329-107370687	3.368	0	GATA2.H12CORE.1.P.B_GATA2.H12CORE.1.P.B	4921523L03Rik	0.002	0	0.002
chr15-85652611-85654383	-2.547	0.005	GATA2.H12CORE.0.PSM.A_GATA2.H12CORE.0.PSM.A	Ttc38	0.049	0.046	0.002
chr15-85652611-85654383	-2.547	0.005	GATA2.H12CORE.1.P.B_GATA2.H12CORE.1.P.B	Ttc38	0.049	0.046	0.002
chr15-85652611-85654383	-2.547	0.005	GATA2.H12CORE.0.PSM.A_GATA2.H12CORE.0.PSM.A	Ttc38	0.049	0.046	0.002
chr15-85652611-85654383	-2.547	0.005	GATA2.H12CORE.1.P.B_GATA2.H12CORE.1.P.B	Ttc38	0.049	0.046	0.002
chr10-60193379-60195507	-3.757	0	GATA2.H12CORE.1.P.B_GATA2.H12CORE.1.P.B	Ctnna3	0.002	0	0.002
chr10-60193379-60195507	-3.757	0	GATA2.H12CORE.1.P.B_GATA2.H12CORE.1.P.B	Ctnna3	0.002	0	0.002
chr14-54430422-54433714	2.708	0.003	GATA2.H12CORE.0.PSM.A_GATA2.H12CORE.0.PSM.A	Tssk4	0.002	0	0.002
chr14-54430422-54433714	2.708	0.003	GATA2.H12CORE.1.P.B_GATA2.H12CORE.1.P.B	Tssk4	0.002	0	0.002
chr14-54430422-54433714	2.708	0.003	GATA2.H12CORE.0.PSM.A_GATA2.H12CORE.0.PSM.A	Tssk4	0.002	0	0.002
chr14-54430422-54433714	2.708	0.003	GATA2.H12CORE.1.P.B_GATA2.H12CORE.1.P.B	Tssk4	0.002	0	0.002
chr3-88359412-88360654	4.058	0	GATA2.H12CORE.0.PSM.A_GATA2.H12CORE.0.PSM.A	Ttc24	0.003	0.001	0.002
chr3-88359412-88360654	4.058	0	GATA2.H12CORE.0.PSM.A_GATA2.H12CORE.0.PSM.A	Ttc24	0.003	0.001	0.002
chr11-61452734-61454369	-2.514	0.006	GATA2.H12CORE.0.PSM.A_GATA2.H12CORE.0.PSM.A	Fam83g	0.004	0.002	0.002
chr11-61452734-61454369	-2.514	0.006	GATA2.H12CORE.1.P.B_GATA2.H12CORE.1.P.B	Fam83g	0.004	0.002	0.002
chr11-61452734-61454369	-2.514	0.006	GATA2.H12CORE.0.PSM.A_GATA2.H12CORE.0.PSM.A	Fam83g	0.004	0.002	0.002
chr11-61452734-61454369	-2.514	0.006	GATA2.H12CORE.1.P.B_GATA2.H12CORE.1.P.B	Fam83g	0.004	0.002	0.002
chr5-42066968-42068691	-3.374	0	GATA2.H12CORE.0.PSM.A_GATA2.H12CORE.0.PSM.A	Fbxl5	0.259	0.257	0.002
chr5-42066968-42068691	-3.374	0	GATA2.H12CORE.1.P.B_GATA2.H12CORE.1.P.B	Fbxl5	0.259	0.257	0.002
chr5-42066968-42068691	-3.374	0	GATA2.H12CORE.1.P.B_GATA2.H12CORE.1.P.B	Fbxl5	0.259	0.257	0.002
chr5-42066968-42068691	-3.374	0	GATA2.H12CORE.0.PSM.A_GATA2.H12CORE.0.PSM.A	Fbxl5	0.259	0.257	0.002
chr5-42066968-42068691	-3.374	0	GATA2.H12CORE.1.P.B_GATA2.H12CORE.1.P.B	Fbxl5	0.259	0.257	0.002
chr5-42066968-42068691	-3.374	0	GATA2.H12CORE.1.P.B_GATA2.H12CORE.1.P.B	Fbxl5	0.259	0.257	0.002
chr4-117644634-117647845	-3.374	0	GATA2.H12CORE.0.PSM.A_GATA2.H12CORE.0.PSM.A	Kif2c	0.007	0.005	0.002
chr4-117644634-117647845	-3.374	0	GATA2.H12CORE.1.P.B_GATA2.H12CORE.1.P.B	Kif2c	0.007	0.005	0.002
chr4-117644634-117647845	-3.374	0	GATA2.H12CORE.0.PSM.A_GATA2.H12CORE.0.PSM.A	Kif2c	0.007	0.005	0.002
chr4-117644634-117647845	-3.374	0	GATA2.H12CORE.1.P.B_GATA2.H12CORE.1.P.B	Kif2c	0.007	0.005	0.002
chr3-108432245-108434266	-2.617	0.004	GATA2.H12CORE.0.PSM.A_GATA2.H12CORE.0.PSM.A	Gm12525	0.007	0.005	0.002
chr3-108432245-108434266	-2.617	0.004	GATA2.H12CORE.1.P.B_GATA2.H12CORE.1.P.B	Gm12525	0.007	0.005	0.002
chr9-107369329-107370687	-3.213	0.001	GATA2.H12CORE.0.PSM.A_GATA2.H12CORE.0.PSM.A	Camkv	0.011	0.008	0.002
chr9-107369329-107370687	-3.213	0.001	GATA2.H12CORE.1.P.B_GATA2.H12CORE.1.P.B	Camkv	0.011	0.008	0.002
chr9-107369329-107370687	-3.213	0.001	GATA2.H12CORE.0.PSM.A_GATA2.H12CORE.0.PSM.A	Camkv	0.011	0.008	0.002
chr9-107369329-107370687	-3.213	0.001	GATA2.H12CORE.1.P.B_GATA2.H12CORE.1.P.B	Camkv	0.011	0.008	0.002
chr7-30279611-30281198	-2.855	0.002	GATA2.H12CORE.1.P.B_GATA2.H12CORE.1.P.B	Atp4a	0.014	0.011	0.002
chr7-30279611-30281198	-2.855	0.002	GATA2.H12CORE.1.P.B_GATA2.H12CORE.1.P.B	Atp4a	0.014	0.011	0.002
chr2-26500037-26501126	3.639	0	GATA2.H12CORE.1.P.B_GATA2.H12CORE.1.P.B	Card9	0.003	0	0.003
chr2-26500037-26501126	3.639	0	GATA2.H12CORE.1.P.B_GATA2.H12CORE.1.P.B	Card9	0.003	0	0.003
chr3-88531166-88533901	2.459	0.007	GATA2.H12CORE.1.P.B_GATA2.H12CORE.1.P.B	Kcnn3	0.003	0	0.003
chr3-88531166-88533901	2.459	0.007	GATA2.H12CORE.1.P.B_GATA2.H12CORE.1.P.B	Kcnn3	0.003	0	0.003
chr9-107369329-107370687	6.461	0	GATA2.H12CORE.0.PSM.A_GATA2.H12CORE.0.PSM.A	Lsmem2	0.003	0	0.003
chr9-107369329-107370687	6.461	0	GATA2.H12CORE.1.P.B_GATA2.H12CORE.1.P.B	Lsmem2	0.003	0	0.003
chr9-107369329-107370687	6.461	0	GATA2.H12CORE.0.PSM.A_GATA2.H12CORE.0.PSM.A	Lsmem2	0.003	0	0.003
chr9-107369329-107370687	6.461	0	GATA2.H12CORE.1.P.B_GATA2.H12CORE.1.P.B	Lsmem2	0.003	0	0.003
chr1-35941254-35942551	4.313	0	GATA2.H12CORE.0.PSM.A_GATA2.H12CORE.0.PSM.A	Ankrd39	0.141	0.139	0.003
chr1-35941254-35942551	4.313	0	GATA2.H12CORE.1.P.B_GATA2.H12CORE.1.P.B	Ankrd39	0.141	0.139	0.003
chr1-35941254-35942551	4.313	0	GATA2.H12CORE.0.PSM.A_GATA2.H12CORE.0.PSM.A	Ankrd39	0.141	0.139	0.003
chr1-35941254-35942551	4.313	0	GATA2.H12CORE.1.P.B_GATA2.H12CORE.1.P.B	Ankrd39	0.141	0.139	0.003
chr1-157054283-157056162	3.221	0.001	GATA2.H12CORE.0.PSM.A_GATA2.H12CORE.0.PSM.A	Sec16b	0.003	0	0.003
chr1-157054283-157056162	3.221	0.001	GATA2.H12CORE.1.P.B_GATA2.H12CORE.1.P.B	Sec16b	0.003	0	0.003
chr1-157054283-157056162	3.221	0.001	GATA2.H12CORE.0.PSM.A_GATA2.H12CORE.0.PSM.A	Sec16b	0.003	0	0.003
chr1-157054283-157056162	3.221	0.001	GATA2.H12CORE.1.P.B_GATA2.H12CORE.1.P.B	Sec16b	0.003	0	0.003
chr2-33615521-33617065	3.173	0.001	GATA2.H12CORE.1.P.B_GATA2.H12CORE.1.P.B	Fam78a	0.003	0	0.003
chr2-33615521-33617065	3.173	0.001	GATA2.H12CORE.1.P.B_GATA2.H12CORE.1.P.B	Fam78a	0.003	0	0.003
chr12-80061772-80063302	4.401	0	GATA2.H12CORE.1.P.B_GATA2.H12CORE.1.P.B	Zfp36l1	0.007	0.004	0.003
chr12-80061772-80063302	4.401	0	GATA2.H12CORE.1.P.B_GATA2.H12CORE.1.P.B	Zfp36l1	0.007	0.004	0.003
chr5-31082378-31084563	4.374	0	GATA2.H12CORE.0.PSM.A_GATA2.H12CORE.0.PSM.A	Ucn	0.003	0	0.003
chr5-31082378-31084563	4.374	0	GATA2.H12CORE.0.PSM.A_GATA2.H12CORE.0.PSM.A	Ucn	0.003	0	0.003
chr5-31086447-31087076	5.342	0	GATA2.H12CORE.1.P.B_GATA2.H12CORE.1.P.B	Ucn	0.003	0	0.003
chr5-31086447-31087076	5.342	0	GATA2.H12CORE.1.P.B_GATA2.H12CORE.1.P.B	Ucn	0.003	0	0.003
chr4-117644634-117647845	-2.662	0.004	GATA2.H12CORE.0.PSM.A_GATA2.H12CORE.0.PSM.A	Szt2	0.051	0.047	0.003
chr4-117644634-117647845	-2.662	0.004	GATA2.H12CORE.1.P.B_GATA2.H12CORE.1.P.B	Szt2	0.051	0.047	0.003
chr4-117644634-117647845	-2.662	0.004	GATA2.H12CORE.0.PSM.A_GATA2.H12CORE.0.PSM.A	Szt2	0.051	0.047	0.003
chr4-117644634-117647845	-2.662	0.004	GATA2.H12CORE.1.P.B_GATA2.H12CORE.1.P.B	Szt2	0.051	0.047	0.003
chr4-121015987-121017695	3.037	0.001	GATA2.H12CORE.0.PSM.A_GATA2.H12CORE.0.PSM.A	Frg2f1	0.012	0.008	0.003
chr4-121015987-121017695	3.037	0.001	GATA2.H12CORE.1.P.B_GATA2.H12CORE.1.P.B	Frg2f1	0.012	0.008	0.003
chr4-121015987-121017695	3.037	0.001	GATA2.H12CORE.0.PSM.A_GATA2.H12CORE.0.PSM.A	Frg2f1	0.012	0.008	0.003
chr4-121015987-121017695	3.037	0.001	GATA2.H12CORE.1.P.B_GATA2.H12CORE.1.P.B	Frg2f1	0.012	0.008	0.003
chr4-140223702-140224803	3.367	0	GATA2.H12CORE.0.PSM.A_GATA2.H12CORE.0.PSM.A	Padi1	0.003	0	0.003
chr4-140223702-140224803	3.367	0	GATA2.H12CORE.0.PSM.A_GATA2.H12CORE.0.PSM.A	Padi1	0.003	0	0.003
chr4-140223702-140224803	3.367	0	GATA2.H12CORE.1.P.B_GATA2.H12CORE.1.P.B	Padi1	0.003	0	0.003
chr4-140223702-140224803	3.367	0	GATA2.H12CORE.0.PSM.A_GATA2.H12CORE.0.PSM.A	Padi1	0.003	0	0.003
chr4-140223702-140224803	3.367	0	GATA2.H12CORE.0.PSM.A_GATA2.H12CORE.0.PSM.A	Padi1	0.003	0	0.003
chr4-140223702-140224803	3.367	0	GATA2.H12CORE.1.P.B_GATA2.H12CORE.1.P.B	Padi1	0.003	0	0.003
chr15-99636844-99638249	-2.82	0.002	GATA2.H12CORE.0.PSM.A_GATA2.H12CORE.0.PSM.A	Prph	0.008	0.005	0.003
chr15-99636844-99638249	-2.82	0.002	GATA2.H12CORE.1.P.B_GATA2.H12CORE.1.P.B	Prph	0.008	0.005	0.003
chr15-99636844-99638249	-2.82	0.002	GATA2.H12CORE.0.PSM.A_GATA2.H12CORE.0.PSM.A	Prph	0.008	0.005	0.003
chr15-99636844-99638249	-2.82	0.002	GATA2.H12CORE.1.P.B_GATA2.H12CORE.1.P.B	Prph	0.008	0.005	0.003
chr15-99663969-99665409	-2.543	0.005	GATA2.H12CORE.0.PSM.A_GATA2.H12CORE.0.PSM.A	Prph	0.008	0.005	0.003
chr15-99663969-99665409	-2.543	0.005	GATA2.H12CORE.1.P.B_GATA2.H12CORE.1.P.B	Prph	0.008	0.005	0.003
chr15-99663969-99665409	-2.543	0.005	GATA2.H12CORE.1.P.B_GATA2.H12CORE.1.P.B	Prph	0.008	0.005	0.003
chr15-99663969-99665409	-2.543	0.005	GATA2.H12CORE.0.PSM.A_GATA2.H12CORE.0.PSM.A	Prph	0.008	0.005	0.003
chr15-99663969-99665409	-2.543	0.005	GATA2.H12CORE.1.P.B_GATA2.H12CORE.1.P.B	Prph	0.008	0.005	0.003
chr15-99663969-99665409	-2.543	0.005	GATA2.H12CORE.1.P.B_GATA2.H12CORE.1.P.B	Prph	0.008	0.005	0.003
chr1-157054283-157056162	-3.506	0	GATA2.H12CORE.0.PSM.A_GATA2.H12CORE.0.PSM.A	Gm10031	0.046	0.043	0.003
chr1-157054283-157056162	-3.506	0	GATA2.H12CORE.1.P.B_GATA2.H12CORE.1.P.B	Gm10031	0.046	0.043	0.003
chr5-31082378-31084563	-2.789	0.003	GATA2.H12CORE.0.PSM.A_GATA2.H12CORE.0.PSM.A	Yes1	0.141	0.138	0.003
chr5-31082378-31084563	-2.789	0.003	GATA2.H12CORE.0.PSM.A_GATA2.H12CORE.0.PSM.A	Yes1	0.141	0.138	0.003
chr8-122719602-122721611	2.799	0.003	GATA2.H12CORE.0.PSM.A_GATA2.H12CORE.0.PSM.A	Afg3l1	0.491	0.488	0.003
chr8-122719602-122721611	2.799	0.003	GATA2.H12CORE.1.P.B_GATA2.H12CORE.1.P.B	Afg3l1	0.491	0.488	0.003
chr8-122719602-122721611	2.799	0.003	GATA2.H12CORE.1.P.B_GATA2.H12CORE.1.P.B	Afg3l1	0.491	0.488	0.003
chr8-122719602-122721611	2.799	0.003	GATA2.H12CORE.0.PSM.A_GATA2.H12CORE.0.PSM.A	Afg3l1	0.491	0.488	0.003
chr8-122719602-122721611	2.799	0.003	GATA2.H12CORE.1.P.B_GATA2.H12CORE.1.P.B	Afg3l1	0.491	0.488	0.003
chr8-122719602-122721611	2.799	0.003	GATA2.H12CORE.1.P.B_GATA2.H12CORE.1.P.B	Afg3l1	0.491	0.488	0.003
chr2-26500037-26501126	-4.332	0	GATA2.H12CORE.1.P.B_GATA2.H12CORE.1.P.B	Kcnt1	0.008	0.005	0.003
chr2-26500037-26501126	-4.332	0	GATA2.H12CORE.1.P.B_GATA2.H12CORE.1.P.B	Kcnt1	0.008	0.005	0.003
chr7-30532717-30533299	-2.808	0.002	GATA2.H12CORE.0.PSM.A_GATA2.H12CORE.0.PSM.A	Nfkbid	0.006	0.002	0.004
chr7-30532717-30533299	-2.808	0.002	GATA2.H12CORE.0.PSM.A_GATA2.H12CORE.0.PSM.A	Nfkbid	0.006	0.002	0.004
chr14-54430422-54433714	2.865	0.002	GATA2.H12CORE.0.PSM.A_GATA2.H12CORE.0.PSM.A	Dhrs4	0.192	0.189	0.004
chr14-54430422-54433714	2.865	0.002	GATA2.H12CORE.1.P.B_GATA2.H12CORE.1.P.B	Dhrs4	0.192	0.189	0.004
chr14-54430422-54433714	2.865	0.002	GATA2.H12CORE.0.PSM.A_GATA2.H12CORE.0.PSM.A	Dhrs4	0.192	0.189	0.004
chr14-54430422-54433714	2.865	0.002	GATA2.H12CORE.1.P.B_GATA2.H12CORE.1.P.B	Dhrs4	0.192	0.189	0.004
chr1-133491895-133493784	2.701	0.003	GATA2.H12CORE.0.PSM.A_GATA2.H12CORE.0.PSM.A	Gm26706	0.004	0	0.004
chr1-133491895-133493784	2.701	0.003	GATA2.H12CORE.0.PSM.A_GATA2.H12CORE.0.PSM.A	Gm26706	0.004	0	0.004
chr5-135076898-135078685	2.49	0.006	GATA2.H12CORE.0.PSM.A_GATA2.H12CORE.0.PSM.A	Eln	0.004	0	0.004
chr5-135076898-135078685	2.49	0.006	GATA2.H12CORE.1.P.B_GATA2.H12CORE.1.P.B	Eln	0.004	0	0.004
chr5-135076898-135078685	2.49	0.006	GATA2.H12CORE.0.PSM.A_GATA2.H12CORE.0.PSM.A	Eln	0.004	0	0.004
chr5-135076898-135078685	2.49	0.006	GATA2.H12CORE.1.P.B_GATA2.H12CORE.1.P.B	Eln	0.004	0	0.004
chr14-54430422-54433714	-2.378	0.009	GATA2.H12CORE.0.PSM.A_GATA2.H12CORE.0.PSM.A	Ppp1r3e	0.006	0.002	0.004
chr14-54430422-54433714	-2.378	0.009	GATA2.H12CORE.1.P.B_GATA2.H12CORE.1.P.B	Ppp1r3e	0.006	0.002	0.004
chr14-54430422-54433714	-2.378	0.009	GATA2.H12CORE.0.PSM.A_GATA2.H12CORE.0.PSM.A	Ppp1r3e	0.006	0.002	0.004
chr14-54430422-54433714	-2.378	0.009	GATA2.H12CORE.1.P.B_GATA2.H12CORE.1.P.B	Ppp1r3e	0.006	0.002	0.004
chr12-80061772-80063302	-2.614	0.004	GATA2.H12CORE.1.P.B_GATA2.H12CORE.1.P.B	Plekhd1	0.004	0	0.004
chr12-80061772-80063302	-2.614	0.004	GATA2.H12CORE.1.P.B_GATA2.H12CORE.1.P.B	Plekhd1	0.004	0	0.004
chr14-54430422-54433714	-2.628	0.004	GATA2.H12CORE.0.PSM.A_GATA2.H12CORE.0.PSM.A	Rnf31	0.044	0.04	0.004
chr14-54430422-54433714	-2.628	0.004	GATA2.H12CORE.1.P.B_GATA2.H12CORE.1.P.B	Rnf31	0.044	0.04	0.004
chr14-54430422-54433714	-2.628	0.004	GATA2.H12CORE.0.PSM.A_GATA2.H12CORE.0.PSM.A	Rnf31	0.044	0.04	0.004
chr14-54430422-54433714	-2.628	0.004	GATA2.H12CORE.1.P.B_GATA2.H12CORE.1.P.B	Rnf31	0.044	0.04	0.004
chr2-26500037-26501126	-3.801	0	GATA2.H12CORE.1.P.B_GATA2.H12CORE.1.P.B	Inpp5e	0.1	0.095	0.004
chr2-26500037-26501126	-3.801	0	GATA2.H12CORE.1.P.B_GATA2.H12CORE.1.P.B	Inpp5e	0.1	0.095	0.004
chr5-120135911-120136981	4.651	0	GATA2.H12CORE.0.PSM.A_GATA2.H12CORE.0.PSM.A	Sds	0.004	0	0.004
chr5-120135911-120136981	4.651	0	GATA2.H12CORE.0.PSM.A_GATA2.H12CORE.0.PSM.A	Sds	0.004	0	0.004
chr5-120135911-120136981	4.651	0	GATA2.H12CORE.1.P.B_GATA2.H12CORE.1.P.B	Sds	0.004	0	0.004
chr5-120135911-120136981	4.651	0	GATA2.H12CORE.1.P.B_GATA2.H12CORE.1.P.B	Sds	0.004	0	0.004
chr5-120135911-120136981	4.651	0	GATA2.H12CORE.0.PSM.A_GATA2.H12CORE.0.PSM.A	Sds	0.004	0	0.004
chr5-120135911-120136981	4.651	0	GATA2.H12CORE.0.PSM.A_GATA2.H12CORE.0.PSM.A	Sds	0.004	0	0.004
chr5-120135911-120136981	4.651	0	GATA2.H12CORE.1.P.B_GATA2.H12CORE.1.P.B	Sds	0.004	0	0.004
chr5-120135911-120136981	4.651	0	GATA2.H12CORE.1.P.B_GATA2.H12CORE.1.P.B	Sds	0.004	0	0.004
chr5-120280182-120281922	2.411	0.008	GATA2.H12CORE.0.PSM.A_GATA2.H12CORE.0.PSM.A	Sds	0.004	0	0.004
chr5-120280182-120281922	2.411	0.008	GATA2.H12CORE.1.P.B_GATA2.H12CORE.1.P.B	Sds	0.004	0	0.004
chr5-120280182-120281922	2.411	0.008	GATA2.H12CORE.0.PSM.A_GATA2.H12CORE.0.PSM.A	Sds	0.004	0	0.004
chr5-120280182-120281922	2.411	0.008	GATA2.H12CORE.1.P.B_GATA2.H12CORE.1.P.B	Sds	0.004	0	0.004
chr5-120287833-120288661	2.95	0.002	GATA2.H12CORE.1.P.B_GATA2.H12CORE.1.P.B	Sds	0.004	0	0.004
chr5-120287833-120288661	2.95	0.002	GATA2.H12CORE.1.P.B_GATA2.H12CORE.1.P.B	Sds	0.004	0	0.004
chr11-84701098-84702453	3.33	0	GATA2.H12CORE.0.PSM.A_GATA2.H12CORE.0.PSM.A	Dhrs11	0.025	0.021	0.004
chr11-84701098-84702453	3.33	0	GATA2.H12CORE.0.PSM.A_GATA2.H12CORE.0.PSM.A	Dhrs11	0.025	0.021	0.004
chr11-84701098-84702453	3.33	0	GATA2.H12CORE.0.PSM.A_GATA2.H12CORE.0.PSM.A	Dhrs11	0.025	0.021	0.004
chr11-84701098-84702453	3.33	0	GATA2.H12CORE.0.PSM.A_GATA2.H12CORE.0.PSM.A	Dhrs11	0.025	0.021	0.004
chr11-84701098-84702453	3.33	0	GATA2.H12CORE.1.P.B_GATA2.H12CORE.1.P.B	Dhrs11	0.025	0.021	0.004
chr11-84701098-84702453	3.33	0	GATA2.H12CORE.1.P.B_GATA2.H12CORE.1.P.B	Dhrs11	0.025	0.021	0.004
chr11-84701098-84702453	3.33	0	GATA2.H12CORE.1.P.B_GATA2.H12CORE.1.P.B	Dhrs11	0.025	0.021	0.004
chr11-84701098-84702453	3.33	0	GATA2.H12CORE.1.P.B_GATA2.H12CORE.1.P.B	Dhrs11	0.025	0.021	0.004
chr11-84701098-84702453	3.33	0	GATA2.H12CORE.1.P.B_GATA2.H12CORE.1.P.B	Dhrs11	0.025	0.021	0.004
chr11-84701098-84702453	3.33	0	GATA2.H12CORE.1.P.B_GATA2.H12CORE.1.P.B	Dhrs11	0.025	0.021	0.004
chr11-84701098-84702453	3.33	0	GATA2.H12CORE.0.PSM.A_GATA2.H12CORE.0.PSM.A	Dhrs11	0.025	0.021	0.004
chr11-84701098-84702453	3.33	0	GATA2.H12CORE.0.PSM.A_GATA2.H12CORE.0.PSM.A	Dhrs11	0.025	0.021	0.004
chr11-84701098-84702453	3.33	0	GATA2.H12CORE.0.PSM.A_GATA2.H12CORE.0.PSM.A	Dhrs11	0.025	0.021	0.004
chr11-84701098-84702453	3.33	0	GATA2.H12CORE.0.PSM.A_GATA2.H12CORE.0.PSM.A	Dhrs11	0.025	0.021	0.004
chr11-84701098-84702453	3.33	0	GATA2.H12CORE.1.P.B_GATA2.H12CORE.1.P.B	Dhrs11	0.025	0.021	0.004
chr11-84701098-84702453	3.33	0	GATA2.H12CORE.1.P.B_GATA2.H12CORE.1.P.B	Dhrs11	0.025	0.021	0.004
chr11-84701098-84702453	3.33	0	GATA2.H12CORE.1.P.B_GATA2.H12CORE.1.P.B	Dhrs11	0.025	0.021	0.004
chr11-84701098-84702453	3.33	0	GATA2.H12CORE.1.P.B_GATA2.H12CORE.1.P.B	Dhrs11	0.025	0.021	0.004
chr11-84701098-84702453	3.33	0	GATA2.H12CORE.1.P.B_GATA2.H12CORE.1.P.B	Dhrs11	0.025	0.021	0.004
chr11-84701098-84702453	3.33	0	GATA2.H12CORE.1.P.B_GATA2.H12CORE.1.P.B	Dhrs11	0.025	0.021	0.004
chr17-15371714-15372354	3.006	0.001	GATA2.H12CORE.0.PSM.A_GATA2.H12CORE.0.PSM.A	Zfp960	0.005	0	0.004
chr17-15371714-15372354	3.006	0.001	GATA2.H12CORE.1.P.B_GATA2.H12CORE.1.P.B	Zfp960	0.005	0	0.004
chr17-15371714-15372354	3.006	0.001	GATA2.H12CORE.0.PSM.A_GATA2.H12CORE.0.PSM.A	Zfp960	0.005	0	0.004
chr17-15371714-15372354	3.006	0.001	GATA2.H12CORE.1.P.B_GATA2.H12CORE.1.P.B	Zfp960	0.005	0	0.004
chr7-121938187-121940143	-2.846	0.002	GATA2.H12CORE.0.PSM.A_GATA2.H12CORE.0.PSM.A	Hs3st4	0.009	0.005	0.005
chr7-121938187-121940143	-2.846	0.002	GATA2.H12CORE.1.P.B_GATA2.H12CORE.1.P.B	Hs3st4	0.009	0.005	0.005
chr7-121938187-121940143	-2.846	0.002	GATA2.H12CORE.0.PSM.A_GATA2.H12CORE.0.PSM.A	Hs3st4	0.009	0.005	0.005
chr7-121938187-121940143	-2.846	0.002	GATA2.H12CORE.1.P.B_GATA2.H12CORE.1.P.B	Hs3st4	0.009	0.005	0.005
chr5-135867509-135869261	-2.734	0.003	GATA2.H12CORE.1.P.B_GATA2.H12CORE.1.P.B	Mettl27	0.023	0.018	0.005
chr5-135867509-135869261	-2.734	0.003	GATA2.H12CORE.1.P.B_GATA2.H12CORE.1.P.B	Mettl27	0.023	0.018	0.005
chr5-31086447-31087076	3.238	0.001	GATA2.H12CORE.1.P.B_GATA2.H12CORE.1.P.B	Tmem214	0.24	0.236	0.005
chr5-31086447-31087076	3.238	0.001	GATA2.H12CORE.1.P.B_GATA2.H12CORE.1.P.B	Tmem214	0.24	0.236	0.005
chr1-75445085-75447030	4.489	0	GATA2.H12CORE.0.PSM.A_GATA2.H12CORE.0.PSM.A	Fev	0.005	0	0.005
chr1-75445085-75447030	4.489	0	GATA2.H12CORE.1.P.B_GATA2.H12CORE.1.P.B	Fev	0.005	0	0.005
chr1-75445085-75447030	4.489	0	GATA2.H12CORE.0.PSM.A_GATA2.H12CORE.0.PSM.A	Fev	0.005	0	0.005
chr1-75445085-75447030	4.489	0	GATA2.H12CORE.1.P.B_GATA2.H12CORE.1.P.B	Fev	0.005	0	0.005
chr1-75448932-75450868	2.826	0.002	GATA2.H12CORE.0.PSM.A_GATA2.H12CORE.0.PSM.A	Fev	0.005	0	0.005
chr1-75448932-75450868	2.826	0.002	GATA2.H12CORE.1.P.B_GATA2.H12CORE.1.P.B	Fev	0.005	0	0.005
chr1-75448932-75450868	2.826	0.002	GATA2.H12CORE.0.PSM.A_GATA2.H12CORE.0.PSM.A	Fev	0.005	0	0.005
chr1-75448932-75450868	2.826	0.002	GATA2.H12CORE.1.P.B_GATA2.H12CORE.1.P.B	Fev	0.005	0	0.005
chr17-47521284-47522324	-3.245	0.001	GATA2.H12CORE.0.PSM.A_GATA2.H12CORE.0.PSM.A	Guca1b	0.005	0	0.005
chr17-47521284-47522324	-3.245	0.001	GATA2.H12CORE.1.P.B_GATA2.H12CORE.1.P.B	Guca1b	0.005	0	0.005
chr17-47521284-47522324	-3.245	0.001	GATA2.H12CORE.0.PSM.A_GATA2.H12CORE.0.PSM.A	Guca1b	0.005	0	0.005
chr17-47521284-47522324	-3.245	0.001	GATA2.H12CORE.1.P.B_GATA2.H12CORE.1.P.B	Guca1b	0.005	0	0.005
chr17-56896196-56897222	2.43	0.008	GATA2.H12CORE.0.PSM.A_GATA2.H12CORE.0.PSM.A	Pspn	0.005	0	0.005
chr17-56896196-56897222	2.43	0.008	GATA2.H12CORE.0.PSM.A_GATA2.H12CORE.0.PSM.A	Pspn	0.005	0	0.005
chr2-33615521-33617065	-4.975	0	GATA2.H12CORE.1.P.B_GATA2.H12CORE.1.P.B	Fam102a	0.058	0.053	0.005
chr2-33615521-33617065	-4.975	0	GATA2.H12CORE.1.P.B_GATA2.H12CORE.1.P.B	Fam102a	0.058	0.053	0.005
chr9-57505347-57506328	2.515	0.006	GATA2.H12CORE.0.PSM.A_GATA2.H12CORE.0.PSM.A	Man2c1os	0.008	0.003	0.005
chr9-57505347-57506328	2.515	0.006	GATA2.H12CORE.1.P.B_GATA2.H12CORE.1.P.B	Man2c1os	0.008	0.003	0.005
chr10-111009121-111011450	2.836	0.002	GATA2.H12CORE.1.P.B_GATA2.H12CORE.1.P.B	Gm28592	0.007	0.002	0.005
chr10-111009121-111011450	2.836	0.002	GATA2.H12CORE.1.P.B_GATA2.H12CORE.1.P.B	Gm28592	0.007	0.002	0.005
chr5-24343787-24345086	2.808	0.002	GATA2.H12CORE.1.P.B_GATA2.H12CORE.1.P.B	Nos3	0.016	0.011	0.005
chr5-24343787-24345086	2.808	0.002	GATA2.H12CORE.1.P.B_GATA2.H12CORE.1.P.B	Nos3	0.016	0.011	0.005
chr17-56761704-56762622	3.219	0.001	GATA2.H12CORE.0.PSM.A_GATA2.H12CORE.0.PSM.A	Gm26547	0.005	0	0.005
chr17-56761704-56762622	3.219	0.001	GATA2.H12CORE.1.P.B_GATA2.H12CORE.1.P.B	Gm26547	0.005	0	0.005
chr17-56761704-56762622	3.219	0.001	GATA2.H12CORE.0.PSM.A_GATA2.H12CORE.0.PSM.A	Gm26547	0.005	0	0.005
chr17-56761704-56762622	3.219	0.001	GATA2.H12CORE.1.P.B_GATA2.H12CORE.1.P.B	Gm26547	0.005	0	0.005
chr9-21029246-21029761	2.811	0.002	GATA2.H12CORE.0.PSM.A_GATA2.H12CORE.0.PSM.A	Gm16754	0.005	0	0.005
chr9-21029246-21029761	2.811	0.002	GATA2.H12CORE.1.P.B_GATA2.H12CORE.1.P.B	Gm16754	0.005	0	0.005
chr9-21029246-21029761	2.811	0.002	GATA2.H12CORE.0.PSM.A_GATA2.H12CORE.0.PSM.A	Gm16754	0.005	0	0.005
chr9-21029246-21029761	2.811	0.002	GATA2.H12CORE.1.P.B_GATA2.H12CORE.1.P.B	Gm16754	0.005	0	0.005
chr1-133491895-133493784	-3.169	0.001	GATA2.H12CORE.0.PSM.A_GATA2.H12CORE.0.PSM.A	Etnk2	0.034	0.029	0.005
chr1-133491895-133493784	-3.169	0.001	GATA2.H12CORE.0.PSM.A_GATA2.H12CORE.0.PSM.A	Etnk2	0.034	0.029	0.005
chr5-114590119-114591611	3.1	0.001	GATA2.H12CORE.0.PSM.A_GATA2.H12CORE.0.PSM.A	4930515G01Rik	0.025	0.02	0.005
chr5-114590119-114591611	3.1	0.001	GATA2.H12CORE.0.PSM.A_GATA2.H12CORE.0.PSM.A	4930515G01Rik	0.025	0.02	0.005
chr5-114590119-114591611	3.1	0.001	GATA2.H12CORE.0.PSM.A_GATA2.H12CORE.0.PSM.A	4930515G01Rik	0.025	0.02	0.005
chr5-114590119-114591611	3.1	0.001	GATA2.H12CORE.1.P.B_GATA2.H12CORE.1.P.B	4930515G01Rik	0.025	0.02	0.005
chr5-114590119-114591611	3.1	0.001	GATA2.H12CORE.1.P.B_GATA2.H12CORE.1.P.B	4930515G01Rik	0.025	0.02	0.005
chr5-114590119-114591611	3.1	0.001	GATA2.H12CORE.1.P.B_GATA2.H12CORE.1.P.B	4930515G01Rik	0.025	0.02	0.005
chr14-54430422-54433714	3.653	0	GATA2.H12CORE.0.PSM.A_GATA2.H12CORE.0.PSM.A	Ap1g2	0.012	0.006	0.006
chr14-54430422-54433714	3.653	0	GATA2.H12CORE.1.P.B_GATA2.H12CORE.1.P.B	Ap1g2	0.012	0.006	0.006
chr14-54430422-54433714	3.653	0	GATA2.H12CORE.0.PSM.A_GATA2.H12CORE.0.PSM.A	Ap1g2	0.012	0.006	0.006
chr14-54430422-54433714	3.653	0	GATA2.H12CORE.1.P.B_GATA2.H12CORE.1.P.B	Ap1g2	0.012	0.006	0.006
chr1-133491895-133493784	3.061	0.001	GATA2.H12CORE.0.PSM.A_GATA2.H12CORE.0.PSM.A	Zc3h11a	0.055	0.049	0.006
chr1-133491895-133493784	3.061	0.001	GATA2.H12CORE.0.PSM.A_GATA2.H12CORE.0.PSM.A	Zc3h11a	0.055	0.049	0.006
chr14-54430422-54433714	3.136	0.001	GATA2.H12CORE.0.PSM.A_GATA2.H12CORE.0.PSM.A	Slc7a7	0.006	0	0.006
chr14-54430422-54433714	3.136	0.001	GATA2.H12CORE.1.P.B_GATA2.H12CORE.1.P.B	Slc7a7	0.006	0	0.006
chr14-54430422-54433714	3.136	0.001	GATA2.H12CORE.0.PSM.A_GATA2.H12CORE.0.PSM.A	Slc7a7	0.006	0	0.006
chr14-54430422-54433714	3.136	0.001	GATA2.H12CORE.1.P.B_GATA2.H12CORE.1.P.B	Slc7a7	0.006	0	0.006
chr12-80061772-80063302	-2.609	0.005	GATA2.H12CORE.1.P.B_GATA2.H12CORE.1.P.B	Slc10a1	0.006	0	0.006
chr12-80061772-80063302	-2.609	0.005	GATA2.H12CORE.1.P.B_GATA2.H12CORE.1.P.B	Slc10a1	0.006	0	0.006
chr4-109224475-109225927	2.994	0.001	GATA2.H12CORE.0.PSM.A_GATA2.H12CORE.0.PSM.A	8030443G20Rik	0.006	0	0.006
chr4-109224475-109225927	2.994	0.001	GATA2.H12CORE.1.P.B_GATA2.H12CORE.1.P.B	8030443G20Rik	0.006	0	0.006
chr2-33615521-33617065	-4.314	0	GATA2.H12CORE.1.P.B_GATA2.H12CORE.1.P.B	Ptrh1	0.024	0.018	0.006
chr2-33615521-33617065	-4.314	0	GATA2.H12CORE.1.P.B_GATA2.H12CORE.1.P.B	Ptrh1	0.024	0.018	0.006
chr1-132738799-132739614	3.641	0	GATA2.H12CORE.1.P.B_GATA2.H12CORE.1.P.B	Klhdc8a	0.225	0.219	0.006
chr1-132738799-132739614	3.641	0	GATA2.H12CORE.1.P.B_GATA2.H12CORE.1.P.B	Klhdc8a	0.225	0.219	0.006
chr5-139681520-139683179	-4.423	0	GATA2.H12CORE.1.P.B_GATA2.H12CORE.1.P.B	Micall2	0.008	0.001	0.006
chr5-139681520-139683179	-4.423	0	GATA2.H12CORE.1.P.B_GATA2.H12CORE.1.P.B	Micall2	0.008	0.001	0.006
chr4-109224475-109225927	4.554	0	GATA2.H12CORE.0.PSM.A_GATA2.H12CORE.0.PSM.A	Orc1	0.006	0	0.006
chr4-109224475-109225927	4.554	0	GATA2.H12CORE.1.P.B_GATA2.H12CORE.1.P.B	Orc1	0.006	0	0.006
chr4-109224475-109225927	4.554	0	GATA2.H12CORE.0.PSM.A_GATA2.H12CORE.0.PSM.A	Orc1	0.006	0	0.006
chr4-109224475-109225927	4.554	0	GATA2.H12CORE.1.P.B_GATA2.H12CORE.1.P.B	Orc1	0.006	0	0.006
chr1-35941254-35942551	4.1	0	GATA2.H12CORE.0.PSM.A_GATA2.H12CORE.0.PSM.A	Sema4c	0.233	0.227	0.007
chr1-35941254-35942551	4.1	0	GATA2.H12CORE.1.P.B_GATA2.H12CORE.1.P.B	Sema4c	0.233	0.227	0.007
chr1-35941254-35942551	4.1	0	GATA2.H12CORE.0.PSM.A_GATA2.H12CORE.0.PSM.A	Sema4c	0.233	0.227	0.007
chr1-35941254-35942551	4.1	0	GATA2.H12CORE.1.P.B_GATA2.H12CORE.1.P.B	Sema4c	0.233	0.227	0.007
chr4-43030745-43032085	-2.428	0.008	GATA2.H12CORE.1.P.B_GATA2.H12CORE.1.P.B	Ccl27b	0.007	0	0.007
chr4-43030745-43032085	-2.428	0.008	GATA2.H12CORE.1.P.B_GATA2.H12CORE.1.P.B	Ccl27b	0.007	0	0.007
chr2-29039946-29041718	2.825	0.002	GATA2.H12CORE.0.PSM.A_GATA2.H12CORE.0.PSM.A	Cfap77	0.007	0	0.007
chr2-29039946-29041718	2.825	0.002	GATA2.H12CORE.0.PSM.A_GATA2.H12CORE.0.PSM.A	Cfap77	0.007	0	0.007
chr2-26500037-26501126	-3.274	0.001	GATA2.H12CORE.1.P.B_GATA2.H12CORE.1.P.B	Snhg7os	0.007	0	0.007
chr13-72298052-72299252	-2.439	0.007	GATA2.H12CORE.0.PSM.A_GATA2.H12CORE.0.PSM.A	Zfp72	0.007	0	0.007
chr13-72298052-72299252	-2.439	0.007	GATA2.H12CORE.0.PSM.A_GATA2.H12CORE.0.PSM.A	Zfp72	0.007	0	0.007
chr13-72298052-72299252	-2.439	0.007	GATA2.H12CORE.1.P.B_GATA2.H12CORE.1.P.B	Zfp72	0.007	0	0.007
chr13-72298052-72299252	-2.439	0.007	GATA2.H12CORE.1.P.B_GATA2.H12CORE.1.P.B	Zfp72	0.007	0	0.007
chr13-72298052-72299252	-2.439	0.007	GATA2.H12CORE.0.PSM.A_GATA2.H12CORE.0.PSM.A	Zfp72	0.007	0	0.007
chr13-72298052-72299252	-2.439	0.007	GATA2.H12CORE.0.PSM.A_GATA2.H12CORE.0.PSM.A	Zfp72	0.007	0	0.007
chr13-72298052-72299252	-2.439	0.007	GATA2.H12CORE.1.P.B_GATA2.H12CORE.1.P.B	Zfp72	0.007	0	0.007
chr13-72298052-72299252	-2.439	0.007	GATA2.H12CORE.1.P.B_GATA2.H12CORE.1.P.B	Zfp72	0.007	0	0.007
chr4-117644634-117647845	-3.598	0	GATA2.H12CORE.0.PSM.A_GATA2.H12CORE.0.PSM.A	Slc6a9	0.007	0	0.007
chr4-117644634-117647845	-3.598	0	GATA2.H12CORE.1.P.B_GATA2.H12CORE.1.P.B	Slc6a9	0.007	0	0.007
chr4-117644634-117647845	-3.598	0	GATA2.H12CORE.0.PSM.A_GATA2.H12CORE.0.PSM.A	Slc6a9	0.007	0	0.007
chr4-117644634-117647845	-3.598	0	GATA2.H12CORE.1.P.B_GATA2.H12CORE.1.P.B	Slc6a9	0.007	0	0.007
chr12-80061772-80063302	2.794	0.003	GATA2.H12CORE.1.P.B_GATA2.H12CORE.1.P.B	Exd2	0.184	0.177	0.007
chr12-80061772-80063302	2.794	0.003	GATA2.H12CORE.1.P.B_GATA2.H12CORE.1.P.B	Exd2	0.184	0.177	0.007
chr5-125151539-125152476	-2.753	0.003	GATA2.H12CORE.0.PSM.A_GATA2.H12CORE.0.PSM.A	Sbno1	0.836	0.829	0.007
chr5-125151539-125152476	-2.753	0.003	GATA2.H12CORE.1.P.B_GATA2.H12CORE.1.P.B	Sbno1	0.836	0.829	0.007
chr5-125151539-125152476	-2.753	0.003	GATA2.H12CORE.0.PSM.A_GATA2.H12CORE.0.PSM.A	Sbno1	0.836	0.829	0.007
chr5-125151539-125152476	-2.753	0.003	GATA2.H12CORE.1.P.B_GATA2.H12CORE.1.P.B	Sbno1	0.836	0.829	0.007
chr4-115056171-115058012	3.63	0	GATA2.H12CORE.0.PSM.A_GATA2.H12CORE.0.PSM.A	Foxd2	0.007	0	0.007
chr4-115056171-115058012	3.63	0	GATA2.H12CORE.1.P.B_GATA2.H12CORE.1.P.B	Foxd2	0.007	0	0.007
chr4-115095346-115097412	6.642	0	GATA2.H12CORE.0.PSM.A_GATA2.H12CORE.0.PSM.A	Foxd2	0.007	0	0.007
chr4-115095346-115097412	6.642	0	GATA2.H12CORE.1.P.B_GATA2.H12CORE.1.P.B	Foxd2	0.007	0	0.007
chr4-115095346-115097412	6.642	0	GATA2.H12CORE.1.P.B_GATA2.H12CORE.1.P.B	Foxd2	0.007	0	0.007
chr14-54430422-54433714	3.641	0	GATA2.H12CORE.0.PSM.A_GATA2.H12CORE.0.PSM.A	Haus4	0.02	0.013	0.007
chr14-54430422-54433714	3.641	0	GATA2.H12CORE.1.P.B_GATA2.H12CORE.1.P.B	Haus4	0.02	0.013	0.007
chr14-54430422-54433714	3.641	0	GATA2.H12CORE.0.PSM.A_GATA2.H12CORE.0.PSM.A	Haus4	0.02	0.013	0.007
chr14-54430422-54433714	3.641	0	GATA2.H12CORE.1.P.B_GATA2.H12CORE.1.P.B	Haus4	0.02	0.013	0.007
chr11-102227380-102228571	3.314	0	GATA2.H12CORE.0.PSM.A_GATA2.H12CORE.0.PSM.A	Rdm1	0.014	0.007	0.007
chr11-102227380-102228571	3.314	0	GATA2.H12CORE.1.P.B_GATA2.H12CORE.1.P.B	Rdm1	0.014	0.007	0.007
chr11-102227380-102228571	3.314	0	GATA2.H12CORE.0.PSM.A_GATA2.H12CORE.0.PSM.A	Rdm1	0.014	0.007	0.007
chr11-102227380-102228571	3.314	0	GATA2.H12CORE.1.P.B_GATA2.H12CORE.1.P.B	Rdm1	0.014	0.007	0.007
chr11-117028347-117029445	2.862	0.002	GATA2.H12CORE.1.P.B_GATA2.H12CORE.1.P.B	Gm11731	0.007	0	0.007
chr11-117028347-117029445	2.862	0.002	GATA2.H12CORE.1.P.B_GATA2.H12CORE.1.P.B	Gm11731	0.007	0	0.007
chr7-109190630-109192251	2.974	0.001	GATA2.H12CORE.0.PSM.A_GATA2.H12CORE.0.PSM.A	Syt9	0.017	0.01	0.007
chr7-109190630-109192251	2.974	0.001	GATA2.H12CORE.0.PSM.A_GATA2.H12CORE.0.PSM.A	Syt9	0.017	0.01	0.007
chr5-31082378-31084563	2.971	0.001	GATA2.H12CORE.0.PSM.A_GATA2.H12CORE.0.PSM.A	Rbks	0.009	0.002	0.007
chr5-31082378-31084563	2.971	0.001	GATA2.H12CORE.0.PSM.A_GATA2.H12CORE.0.PSM.A	Rbks	0.009	0.002	0.007
chr16-33605399-33607413	5.392	0	GATA2.H12CORE.0.PSM.A_GATA2.H12CORE.0.PSM.A	Heg1	0.036	0.029	0.007
chr16-33605399-33607413	5.392	0	GATA2.H12CORE.0.PSM.A_GATA2.H12CORE.0.PSM.A	Heg1	0.036	0.029	0.007
chr7-109190630-109192251	2.473	0.007	GATA2.H12CORE.0.PSM.A_GATA2.H12CORE.0.PSM.A	Wee1	0.017	0.009	0.008
chr7-109190630-109192251	2.473	0.007	GATA2.H12CORE.0.PSM.A_GATA2.H12CORE.0.PSM.A	Wee1	0.017	0.009	0.008
chr12-112163716-112164983	2.525	0.006	GATA2.H12CORE.0.PSM.A_GATA2.H12CORE.0.PSM.A	Eif5	2.458	2.451	0.008
chr12-112163716-112164983	2.525	0.006	GATA2.H12CORE.0.PSM.A_GATA2.H12CORE.0.PSM.A	Eif5	2.458	2.451	0.008
chr12-112163716-112164983	2.525	0.006	GATA2.H12CORE.1.P.B_GATA2.H12CORE.1.P.B	Eif5	2.458	2.451	0.008
chr12-112163716-112164983	2.525	0.006	GATA2.H12CORE.0.PSM.A_GATA2.H12CORE.0.PSM.A	Eif5	2.458	2.451	0.008
chr12-112163716-112164983	2.525	0.006	GATA2.H12CORE.0.PSM.A_GATA2.H12CORE.0.PSM.A	Eif5	2.458	2.451	0.008
chr12-112163716-112164983	2.525	0.006	GATA2.H12CORE.1.P.B_GATA2.H12CORE.1.P.B	Eif5	2.458	2.451	0.008
chr1-35941254-35942551	4.794	0	GATA2.H12CORE.0.PSM.A_GATA2.H12CORE.0.PSM.A	Ptpn18	0.01	0.002	0.008
chr1-35941254-35942551	4.794	0	GATA2.H12CORE.1.P.B_GATA2.H12CORE.1.P.B	Ptpn18	0.01	0.002	0.008
chr1-35941254-35942551	4.794	0	GATA2.H12CORE.0.PSM.A_GATA2.H12CORE.0.PSM.A	Ptpn18	0.01	0.002	0.008
chr1-35941254-35942551	4.794	0	GATA2.H12CORE.1.P.B_GATA2.H12CORE.1.P.B	Ptpn18	0.01	0.002	0.008
chr4-13750100-13751825	2.412	0.008	GATA2.H12CORE.0.PSM.A_GATA2.H12CORE.0.PSM.A	Gm11823	0.01	0.002	0.008
chr4-13750100-13751825	2.412	0.008	GATA2.H12CORE.0.PSM.A_GATA2.H12CORE.0.PSM.A	Gm11823	0.01	0.002	0.008
chr4-13750100-13751825	2.412	0.008	GATA2.H12CORE.1.P.B_GATA2.H12CORE.1.P.B	Gm11823	0.01	0.002	0.008
chr4-13750100-13751825	2.412	0.008	GATA2.H12CORE.1.P.B_GATA2.H12CORE.1.P.B	Gm11823	0.01	0.002	0.008
chr4-13750100-13751825	2.412	0.008	GATA2.H12CORE.0.PSM.A_GATA2.H12CORE.0.PSM.A	Gm11823	0.01	0.002	0.008
chr4-13750100-13751825	2.412	0.008	GATA2.H12CORE.0.PSM.A_GATA2.H12CORE.0.PSM.A	Gm11823	0.01	0.002	0.008
chr4-13750100-13751825	2.412	0.008	GATA2.H12CORE.1.P.B_GATA2.H12CORE.1.P.B	Gm11823	0.01	0.002	0.008
chr4-13750100-13751825	2.412	0.008	GATA2.H12CORE.1.P.B_GATA2.H12CORE.1.P.B	Gm11823	0.01	0.002	0.008
chr11-102227380-102228571	2.72	0.003	GATA2.H12CORE.0.PSM.A_GATA2.H12CORE.0.PSM.A	1700006E09Rik	0.008	0	0.008
chr11-102227380-102228571	2.72	0.003	GATA2.H12CORE.1.P.B_GATA2.H12CORE.1.P.B	1700006E09Rik	0.008	0	0.008
chr11-102227380-102228571	2.72	0.003	GATA2.H12CORE.0.PSM.A_GATA2.H12CORE.0.PSM.A	1700006E09Rik	0.008	0	0.008
chr11-102227380-102228571	2.72	0.003	GATA2.H12CORE.1.P.B_GATA2.H12CORE.1.P.B	1700006E09Rik	0.008	0	0.008
chr7-109114530-109116326	2.452	0.007	GATA2.H12CORE.0.PSM.A_GATA2.H12CORE.0.PSM.A	Dnhd1	0.008	0	0.008
chr7-109114530-109116326	2.452	0.007	GATA2.H12CORE.1.P.B_GATA2.H12CORE.1.P.B	Dnhd1	0.008	0	0.008
chr7-109114530-109116326	2.452	0.007	GATA2.H12CORE.1.P.B_GATA2.H12CORE.1.P.B	Dnhd1	0.008	0	0.008
chr7-109114530-109116326	2.452	0.007	GATA2.H12CORE.0.PSM.A_GATA2.H12CORE.0.PSM.A	Dnhd1	0.008	0	0.008
chr7-109114530-109116326	2.452	0.007	GATA2.H12CORE.1.P.B_GATA2.H12CORE.1.P.B	Dnhd1	0.008	0	0.008
chr7-109114530-109116326	2.452	0.007	GATA2.H12CORE.1.P.B_GATA2.H12CORE.1.P.B	Dnhd1	0.008	0	0.008
chr17-56761704-56762622	3.618	0	GATA2.H12CORE.0.PSM.A_GATA2.H12CORE.0.PSM.A	Plin5	0.008	0	0.008
chr17-56761704-56762622	3.618	0	GATA2.H12CORE.1.P.B_GATA2.H12CORE.1.P.B	Plin5	0.008	0	0.008
chr17-56761704-56762622	3.618	0	GATA2.H12CORE.0.PSM.A_GATA2.H12CORE.0.PSM.A	Plin5	0.008	0	0.008
chr17-56761704-56762622	3.618	0	GATA2.H12CORE.1.P.B_GATA2.H12CORE.1.P.B	Plin5	0.008	0	0.008
chr4-117644634-117647845	4.52	0	GATA2.H12CORE.0.PSM.A_GATA2.H12CORE.0.PSM.A	Ipo13	0.145	0.137	0.008
chr4-117644634-117647845	4.52	0	GATA2.H12CORE.1.P.B_GATA2.H12CORE.1.P.B	Ipo13	0.145	0.137	0.008
chr4-117644634-117647845	4.52	0	GATA2.H12CORE.0.PSM.A_GATA2.H12CORE.0.PSM.A	Ipo13	0.145	0.137	0.008
chr4-117644634-117647845	4.52	0	GATA2.H12CORE.1.P.B_GATA2.H12CORE.1.P.B	Ipo13	0.145	0.137	0.008
chr2-26500037-26501126	2.958	0.002	GATA2.H12CORE.1.P.B_GATA2.H12CORE.1.P.B	Qsox2	0.082	0.074	0.009
chr2-26500037-26501126	2.958	0.002	GATA2.H12CORE.1.P.B_GATA2.H12CORE.1.P.B	Qsox2	0.082	0.074	0.009
chr5-139535260-139537387	2.434	0.007	GATA2.H12CORE.0.PSM.A_GATA2.H12CORE.0.PSM.A	Gna12	0.335	0.327	0.009
chr5-139535260-139537387	2.434	0.007	GATA2.H12CORE.1.P.B_GATA2.H12CORE.1.P.B	Gna12	0.335	0.327	0.009
chr5-139535260-139537387	2.434	0.007	GATA2.H12CORE.1.P.B_GATA2.H12CORE.1.P.B	Gna12	0.335	0.327	0.009
chr5-139535260-139537387	2.434	0.007	GATA2.H12CORE.0.PSM.A_GATA2.H12CORE.0.PSM.A	Gna12	0.335	0.327	0.009
chr5-139535260-139537387	2.434	0.007	GATA2.H12CORE.1.P.B_GATA2.H12CORE.1.P.B	Gna12	0.335	0.327	0.009
chr5-139535260-139537387	2.434	0.007	GATA2.H12CORE.1.P.B_GATA2.H12CORE.1.P.B	Gna12	0.335	0.327	0.009
chr14-54430422-54433714	-2.56	0.005	GATA2.H12CORE.0.PSM.A_GATA2.H12CORE.0.PSM.A	Sdr39u1	0.154	0.146	0.009
chr14-54430422-54433714	-2.56	0.005	GATA2.H12CORE.1.P.B_GATA2.H12CORE.1.P.B	Sdr39u1	0.154	0.146	0.009
chr14-54430422-54433714	-2.56	0.005	GATA2.H12CORE.0.PSM.A_GATA2.H12CORE.0.PSM.A	Sdr39u1	0.154	0.146	0.009
chr14-54430422-54433714	-2.56	0.005	GATA2.H12CORE.1.P.B_GATA2.H12CORE.1.P.B	Sdr39u1	0.154	0.146	0.009
chr5-114776222-114776466	3.047	0.001	GATA2.H12CORE.0.PSM.A_GATA2.H12CORE.0.PSM.A	Dao	0.009	0	0.009
chr5-114776222-114776466	3.047	0.001	GATA2.H12CORE.0.PSM.A_GATA2.H12CORE.0.PSM.A	Dao	0.009	0	0.009
chr14-54430422-54433714	2.938	0.002	GATA2.H12CORE.0.PSM.A_GATA2.H12CORE.0.PSM.A	Ipo4	0.158	0.149	0.009
chr14-54430422-54433714	2.938	0.002	GATA2.H12CORE.1.P.B_GATA2.H12CORE.1.P.B	Ipo4	0.158	0.149	0.009
chr14-54430422-54433714	2.938	0.002	GATA2.H12CORE.0.PSM.A_GATA2.H12CORE.0.PSM.A	Ipo4	0.158	0.149	0.009
chr14-54430422-54433714	2.938	0.002	GATA2.H12CORE.1.P.B_GATA2.H12CORE.1.P.B	Ipo4	0.158	0.149	0.009
chr9-107369329-107370687	5.599	0	GATA2.H12CORE.0.PSM.A_GATA2.H12CORE.0.PSM.A	Rnf123	0.114	0.106	0.009
chr9-107369329-107370687	5.599	0	GATA2.H12CORE.1.P.B_GATA2.H12CORE.1.P.B	Rnf123	0.114	0.106	0.009
chr9-107369329-107370687	5.599	0	GATA2.H12CORE.0.PSM.A_GATA2.H12CORE.0.PSM.A	Rnf123	0.114	0.106	0.009
chr9-107369329-107370687	5.599	0	GATA2.H12CORE.1.P.B_GATA2.H12CORE.1.P.B	Rnf123	0.114	0.106	0.009
chr7-109190630-109192251	2.811	0.002	GATA2.H12CORE.0.PSM.A_GATA2.H12CORE.0.PSM.A	Eif3f	2.501	2.492	0.009
chr7-109190630-109192251	2.811	0.002	GATA2.H12CORE.0.PSM.A_GATA2.H12CORE.0.PSM.A	Eif3f	2.501	2.492	0.009
chr17-56367994-56368766	3.785	0	GATA2.H12CORE.0.PSM.A_GATA2.H12CORE.0.PSM.A	Fem1a	0.277	0.268	0.009
chr17-56367994-56368766	3.785	0	GATA2.H12CORE.1.P.B_GATA2.H12CORE.1.P.B	Fem1a	0.277	0.268	0.009
chr17-56761704-56762622	2.489	0.006	GATA2.H12CORE.0.PSM.A_GATA2.H12CORE.0.PSM.A	Fem1a	0.277	0.268	0.009
chr17-56761704-56762622	2.489	0.006	GATA2.H12CORE.1.P.B_GATA2.H12CORE.1.P.B	Fem1a	0.277	0.268	0.009
chr3-108432245-108434266	-5.108	0	GATA2.H12CORE.0.PSM.A_GATA2.H12CORE.0.PSM.A	Wdr47	0.374	0.364	0.009
chr3-108432245-108434266	-5.108	0	GATA2.H12CORE.1.P.B_GATA2.H12CORE.1.P.B	Wdr47	0.374	0.364	0.009
chr3-108432245-108434266	-5.108	0	GATA2.H12CORE.0.PSM.A_GATA2.H12CORE.0.PSM.A	Wdr47	0.374	0.364	0.009
chr3-108432245-108434266	-5.108	0	GATA2.H12CORE.1.P.B_GATA2.H12CORE.1.P.B	Wdr47	0.374	0.364	0.009
chr12-80061772-80063302	-2.7	0.003	GATA2.H12CORE.1.P.B_GATA2.H12CORE.1.P.B	Slc8a3	0.022	0.012	0.01
chr12-80061772-80063302	-2.7	0.003	GATA2.H12CORE.1.P.B_GATA2.H12CORE.1.P.B	Slc8a3	0.022	0.012	0.01
chr11-102227380-102228571	2.913	0.002	GATA2.H12CORE.0.PSM.A_GATA2.H12CORE.0.PSM.A	Dusp3	0.02	0.01	0.01
chr11-102227380-102228571	2.913	0.002	GATA2.H12CORE.1.P.B_GATA2.H12CORE.1.P.B	Dusp3	0.02	0.01	0.01
chr11-102227380-102228571	2.913	0.002	GATA2.H12CORE.0.PSM.A_GATA2.H12CORE.0.PSM.A	Dusp3	0.02	0.01	0.01
chr11-102227380-102228571	2.913	0.002	GATA2.H12CORE.1.P.B_GATA2.H12CORE.1.P.B	Dusp3	0.02	0.01	0.01
chr2-152046976-152049497	2.874	0.002	GATA2.H12CORE.0.PSM.A_GATA2.H12CORE.0.PSM.A	AA387200	0.052	0.042	0.01
chr2-152046976-152049497	2.874	0.002	GATA2.H12CORE.1.P.B_GATA2.H12CORE.1.P.B	AA387200	0.052	0.042	0.01
chr5-114776222-114776466	2.573	0.005	GATA2.H12CORE.0.PSM.A_GATA2.H12CORE.0.PSM.A	Ankrd13a	0.377	0.367	0.01
chr5-114776222-114776466	2.573	0.005	GATA2.H12CORE.0.PSM.A_GATA2.H12CORE.0.PSM.A	Ankrd13a	0.377	0.367	0.01
chr2-26500037-26501126	4.361	0	GATA2.H12CORE.1.P.B_GATA2.H12CORE.1.P.B	Egfl7	0.052	0.042	0.01
chr2-26500037-26501126	4.361	0	GATA2.H12CORE.1.P.B_GATA2.H12CORE.1.P.B	Egfl7	0.052	0.042	0.01
chr5-139681520-139683179	-2.658	0.004	GATA2.H12CORE.1.P.B_GATA2.H12CORE.1.P.B	Snx8	0.057	0.046	0.01
chr5-139681520-139683179	-2.658	0.004	GATA2.H12CORE.1.P.B_GATA2.H12CORE.1.P.B	Snx8	0.057	0.046	0.01
chr10-60193379-60195507	-3.576	0	GATA2.H12CORE.1.P.B_GATA2.H12CORE.1.P.B	Mcu	0.113	0.102	0.01
chr10-60193379-60195507	-3.576	0	GATA2.H12CORE.1.P.B_GATA2.H12CORE.1.P.B	Mcu	0.113	0.102	0.01
chr17-56761704-56762622	2.799	0.003	GATA2.H12CORE.0.PSM.A_GATA2.H12CORE.0.PSM.A	Vmac	0.083	0.073	0.01
chr17-56761704-56762622	2.799	0.003	GATA2.H12CORE.1.P.B_GATA2.H12CORE.1.P.B	Vmac	0.083	0.073	0.01
chr17-56761704-56762622	2.799	0.003	GATA2.H12CORE.0.PSM.A_GATA2.H12CORE.0.PSM.A	Vmac	0.083	0.073	0.01
chr17-56761704-56762622	2.799	0.003	GATA2.H12CORE.1.P.B_GATA2.H12CORE.1.P.B	Vmac	0.083	0.073	0.01
chr4-109224475-109225927	4.258	0	GATA2.H12CORE.0.PSM.A_GATA2.H12CORE.0.PSM.A	Calr4	0.01	0	0.01
chr4-109224475-109225927	4.258	0	GATA2.H12CORE.1.P.B_GATA2.H12CORE.1.P.B	Calr4	0.01	0	0.01
chr4-109224475-109225927	4.258	0	GATA2.H12CORE.0.PSM.A_GATA2.H12CORE.0.PSM.A	Calr4	0.01	0	0.01
chr4-109224475-109225927	4.258	0	GATA2.H12CORE.1.P.B_GATA2.H12CORE.1.P.B	Calr4	0.01	0	0.01
chr11-102227380-102228571	-3.082	0.001	GATA2.H12CORE.0.PSM.A_GATA2.H12CORE.0.PSM.A	Itga2b	0.016	0.005	0.011
chr11-102227380-102228571	-3.082	0.001	GATA2.H12CORE.1.P.B_GATA2.H12CORE.1.P.B	Itga2b	0.016	0.005	0.011
chr11-102227380-102228571	-3.082	0.001	GATA2.H12CORE.0.PSM.A_GATA2.H12CORE.0.PSM.A	Itga2b	0.016	0.005	0.011
chr11-102227380-102228571	-3.082	0.001	GATA2.H12CORE.1.P.B_GATA2.H12CORE.1.P.B	Itga2b	0.016	0.005	0.011
chr1-133491895-133493784	2.836	0.002	GATA2.H12CORE.0.PSM.A_GATA2.H12CORE.0.PSM.A	Prelp	0.011	0	0.011
chr1-133491895-133493784	2.836	0.002	GATA2.H12CORE.0.PSM.A_GATA2.H12CORE.0.PSM.A	Prelp	0.011	0	0.011
chr5-31086447-31087076	3.208	0.001	GATA2.H12CORE.1.P.B_GATA2.H12CORE.1.P.B	4632411P08Rik	0.011	0	0.011
chr5-31086447-31087076	3.208	0.001	GATA2.H12CORE.1.P.B_GATA2.H12CORE.1.P.B	4632411P08Rik	0.011	0	0.011
chr17-15371714-15372354	4.595	0	GATA2.H12CORE.0.PSM.A_GATA2.H12CORE.0.PSM.A	BC002059	0.105	0.094	0.011
chr17-15371714-15372354	4.595	0	GATA2.H12CORE.1.P.B_GATA2.H12CORE.1.P.B	BC002059	0.105	0.094	0.011
chr17-15371714-15372354	4.595	0	GATA2.H12CORE.0.PSM.A_GATA2.H12CORE.0.PSM.A	BC002059	0.105	0.094	0.011
chr17-15371714-15372354	4.595	0	GATA2.H12CORE.1.P.B_GATA2.H12CORE.1.P.B	BC002059	0.105	0.094	0.011
chr15-99636844-99638249	2.511	0.006	GATA2.H12CORE.0.PSM.A_GATA2.H12CORE.0.PSM.A	Gm29331	0.011	0	0.011
chr15-99636844-99638249	2.511	0.006	GATA2.H12CORE.1.P.B_GATA2.H12CORE.1.P.B	Gm29331	0.011	0	0.011
chr15-99663969-99665409	3.333	0	GATA2.H12CORE.0.PSM.A_GATA2.H12CORE.0.PSM.A	Gm29331	0.011	0	0.011
chr15-99663969-99665409	3.333	0	GATA2.H12CORE.1.P.B_GATA2.H12CORE.1.P.B	Gm29331	0.011	0	0.011
chr15-99663969-99665409	3.333	0	GATA2.H12CORE.1.P.B_GATA2.H12CORE.1.P.B	Gm29331	0.011	0	0.011
chr11-113749685-113752063	-2.892	0.002	GATA2.H12CORE.1.P.B_GATA2.H12CORE.1.P.B	Cpsf4l	0.011	0	0.011
chr11-113749685-113752063	-2.892	0.002	GATA2.H12CORE.1.P.B_GATA2.H12CORE.1.P.B	Cpsf4l	0.011	0	0.011
chr8-84729810-84732148	2.671	0.004	GATA2.H12CORE.0.PSM.A_GATA2.H12CORE.0.PSM.A	G430095P16Rik	0.012	0	0.011
chr8-84729810-84732148	2.671	0.004	GATA2.H12CORE.1.P.B_GATA2.H12CORE.1.P.B	G430095P16Rik	0.012	0	0.011
chr8-84729810-84732148	2.671	0.004	GATA2.H12CORE.1.P.B_GATA2.H12CORE.1.P.B	G430095P16Rik	0.012	0	0.011
chr8-84729810-84732148	2.671	0.004	GATA2.H12CORE.0.PSM.A_GATA2.H12CORE.0.PSM.A	G430095P16Rik	0.012	0	0.011
chr8-84729810-84732148	2.671	0.004	GATA2.H12CORE.1.P.B_GATA2.H12CORE.1.P.B	G430095P16Rik	0.012	0	0.011
chr8-84729810-84732148	2.671	0.004	GATA2.H12CORE.1.P.B_GATA2.H12CORE.1.P.B	G430095P16Rik	0.012	0	0.011
chr2-26500037-26501126	2.832	0.002	GATA2.H12CORE.1.P.B_GATA2.H12CORE.1.P.B	Ndor1	0.028	0.017	0.011
chr2-26500037-26501126	2.832	0.002	GATA2.H12CORE.1.P.B_GATA2.H12CORE.1.P.B	Ndor1	0.028	0.017	0.011
chr8-122719602-122721611	3.109	0.001	GATA2.H12CORE.0.PSM.A_GATA2.H12CORE.0.PSM.A	Dbndd1	0.594	0.583	0.012
chr8-122719602-122721611	3.109	0.001	GATA2.H12CORE.1.P.B_GATA2.H12CORE.1.P.B	Dbndd1	0.594	0.583	0.012
chr8-122719602-122721611	3.109	0.001	GATA2.H12CORE.1.P.B_GATA2.H12CORE.1.P.B	Dbndd1	0.594	0.583	0.012
chr8-122719602-122721611	3.109	0.001	GATA2.H12CORE.0.PSM.A_GATA2.H12CORE.0.PSM.A	Dbndd1	0.594	0.583	0.012
chr8-122719602-122721611	3.109	0.001	GATA2.H12CORE.1.P.B_GATA2.H12CORE.1.P.B	Dbndd1	0.594	0.583	0.012
chr8-122719602-122721611	3.109	0.001	GATA2.H12CORE.1.P.B_GATA2.H12CORE.1.P.B	Dbndd1	0.594	0.583	0.012
chr15-85652611-85654383	-3.278	0.001	GATA2.H12CORE.0.PSM.A_GATA2.H12CORE.0.PSM.A	Tbc1d22a	0.1	0.089	0.012
chr15-85652611-85654383	-3.278	0.001	GATA2.H12CORE.1.P.B_GATA2.H12CORE.1.P.B	Tbc1d22a	0.1	0.089	0.012
chr15-85652611-85654383	-3.278	0.001	GATA2.H12CORE.0.PSM.A_GATA2.H12CORE.0.PSM.A	Tbc1d22a	0.1	0.089	0.012
chr15-85652611-85654383	-3.278	0.001	GATA2.H12CORE.1.P.B_GATA2.H12CORE.1.P.B	Tbc1d22a	0.1	0.089	0.012
chr15-85652611-85654383	4.308	0	GATA2.H12CORE.0.PSM.A_GATA2.H12CORE.0.PSM.A	Celsr1	0.012	0	0.012
chr15-85652611-85654383	4.308	0	GATA2.H12CORE.1.P.B_GATA2.H12CORE.1.P.B	Celsr1	0.012	0	0.012
chr15-85652611-85654383	4.308	0	GATA2.H12CORE.0.PSM.A_GATA2.H12CORE.0.PSM.A	Celsr1	0.012	0	0.012
chr15-85652611-85654383	4.308	0	GATA2.H12CORE.1.P.B_GATA2.H12CORE.1.P.B	Celsr1	0.012	0	0.012
chr4-117644634-117647845	-3.487	0	GATA2.H12CORE.0.PSM.A_GATA2.H12CORE.0.PSM.A	Cdc20	0.06	0.048	0.012
chr4-117644634-117647845	-3.487	0	GATA2.H12CORE.1.P.B_GATA2.H12CORE.1.P.B	Cdc20	0.06	0.048	0.012
chr4-117644634-117647845	-3.487	0	GATA2.H12CORE.0.PSM.A_GATA2.H12CORE.0.PSM.A	Cdc20	0.06	0.048	0.012
chr4-117644634-117647845	-3.487	0	GATA2.H12CORE.1.P.B_GATA2.H12CORE.1.P.B	Cdc20	0.06	0.048	0.012
chr2-26500037-26501126	-3.799	0	GATA2.H12CORE.1.P.B_GATA2.H12CORE.1.P.B	Grin1	0.021	0.009	0.012
chr2-26500037-26501126	-3.799	0	GATA2.H12CORE.1.P.B_GATA2.H12CORE.1.P.B	Grin1	0.021	0.009	0.012
chr14-54430422-54433714	2.603	0.005	GATA2.H12CORE.0.PSM.A_GATA2.H12CORE.0.PSM.A	Cpne6	0.015	0.003	0.012
chr14-54430422-54433714	2.603	0.005	GATA2.H12CORE.1.P.B_GATA2.H12CORE.1.P.B	Cpne6	0.015	0.003	0.012
chr14-54430422-54433714	2.603	0.005	GATA2.H12CORE.0.PSM.A_GATA2.H12CORE.0.PSM.A	Cpne6	0.015	0.003	0.012
chr14-54430422-54433714	2.603	0.005	GATA2.H12CORE.1.P.B_GATA2.H12CORE.1.P.B	Cpne6	0.015	0.003	0.012
chr9-107369329-107370687	4.889	0	GATA2.H12CORE.0.PSM.A_GATA2.H12CORE.0.PSM.A	Gnat1	0.016	0.004	0.012
chr9-107369329-107370687	4.889	0	GATA2.H12CORE.1.P.B_GATA2.H12CORE.1.P.B	Gnat1	0.016	0.004	0.012
chr9-107369329-107370687	4.889	0	GATA2.H12CORE.0.PSM.A_GATA2.H12CORE.0.PSM.A	Gnat1	0.016	0.004	0.012
chr9-107369329-107370687	4.889	0	GATA2.H12CORE.1.P.B_GATA2.H12CORE.1.P.B	Gnat1	0.016	0.004	0.012
chr9-107520943-107522649	2.39	0.008	GATA2.H12CORE.0.PSM.A_GATA2.H12CORE.0.PSM.A	Gnat1	0.016	0.004	0.012
chr9-107520943-107522649	2.39	0.008	GATA2.H12CORE.0.PSM.A_GATA2.H12CORE.0.PSM.A	Gnat1	0.016	0.004	0.012
chr9-21029246-21029761	2.593	0.005	GATA2.H12CORE.0.PSM.A_GATA2.H12CORE.0.PSM.A	Swsap1	0.132	0.12	0.012
chr9-21029246-21029761	2.593	0.005	GATA2.H12CORE.1.P.B_GATA2.H12CORE.1.P.B	Swsap1	0.132	0.12	0.012
chr9-21029246-21029761	2.593	0.005	GATA2.H12CORE.0.PSM.A_GATA2.H12CORE.0.PSM.A	Swsap1	0.132	0.12	0.012
chr9-21029246-21029761	2.593	0.005	GATA2.H12CORE.1.P.B_GATA2.H12CORE.1.P.B	Swsap1	0.132	0.12	0.012
chr2-26500037-26501126	3.386	0	GATA2.H12CORE.1.P.B_GATA2.H12CORE.1.P.B	Ccdc187	0.039	0.027	0.012
chr2-26500037-26501126	3.386	0	GATA2.H12CORE.1.P.B_GATA2.H12CORE.1.P.B	Ccdc187	0.039	0.027	0.012
chr17-56367994-56368766	4.017	0	GATA2.H12CORE.0.PSM.A_GATA2.H12CORE.0.PSM.A	Rpl7a-ps5	0.028	0.016	0.012
chr17-56367994-56368766	4.017	0	GATA2.H12CORE.1.P.B_GATA2.H12CORE.1.P.B	Rpl7a-ps5	0.028	0.016	0.012
chr1-35941254-35942551	-3.574	0	GATA2.H12CORE.0.PSM.A_GATA2.H12CORE.0.PSM.A	Arhgef4	0.175	0.163	0.012
chr1-35941254-35942551	-3.574	0	GATA2.H12CORE.1.P.B_GATA2.H12CORE.1.P.B	Arhgef4	0.175	0.163	0.012
chr1-35941254-35942551	-3.574	0	GATA2.H12CORE.0.PSM.A_GATA2.H12CORE.0.PSM.A	Arhgef4	0.175	0.163	0.012
chr1-35941254-35942551	-3.574	0	GATA2.H12CORE.1.P.B_GATA2.H12CORE.1.P.B	Arhgef4	0.175	0.163	0.012
chr8-122719602-122721611	2.479	0.007	GATA2.H12CORE.0.PSM.A_GATA2.H12CORE.0.PSM.A	Sult5a1	0.026	0.014	0.013
chr8-122719602-122721611	2.479	0.007	GATA2.H12CORE.1.P.B_GATA2.H12CORE.1.P.B	Sult5a1	0.026	0.014	0.013
chr8-122719602-122721611	2.479	0.007	GATA2.H12CORE.1.P.B_GATA2.H12CORE.1.P.B	Sult5a1	0.026	0.014	0.013
chr8-122719602-122721611	2.479	0.007	GATA2.H12CORE.0.PSM.A_GATA2.H12CORE.0.PSM.A	Sult5a1	0.026	0.014	0.013
chr8-122719602-122721611	2.479	0.007	GATA2.H12CORE.1.P.B_GATA2.H12CORE.1.P.B	Sult5a1	0.026	0.014	0.013
chr8-122719602-122721611	2.479	0.007	GATA2.H12CORE.1.P.B_GATA2.H12CORE.1.P.B	Sult5a1	0.026	0.014	0.013
chr1-35941254-35942551	2.376	0.009	GATA2.H12CORE.0.PSM.A_GATA2.H12CORE.0.PSM.A	Inpp4a	0.142	0.13	0.013
chr1-35941254-35942551	2.376	0.009	GATA2.H12CORE.1.P.B_GATA2.H12CORE.1.P.B	Inpp4a	0.142	0.13	0.013
chr1-35941254-35942551	2.376	0.009	GATA2.H12CORE.0.PSM.A_GATA2.H12CORE.0.PSM.A	Inpp4a	0.142	0.13	0.013
chr1-35941254-35942551	2.376	0.009	GATA2.H12CORE.1.P.B_GATA2.H12CORE.1.P.B	Inpp4a	0.142	0.13	0.013
chr9-57505347-57506328	-2.67	0.004	GATA2.H12CORE.0.PSM.A_GATA2.H12CORE.0.PSM.A	Man2c1	0.066	0.053	0.013
chr9-57505347-57506328	-2.67	0.004	GATA2.H12CORE.1.P.B_GATA2.H12CORE.1.P.B	Man2c1	0.066	0.053	0.013
chr9-57505347-57506328	-2.67	0.004	GATA2.H12CORE.0.PSM.A_GATA2.H12CORE.0.PSM.A	Man2c1	0.066	0.053	0.013
chr9-57505347-57506328	-2.67	0.004	GATA2.H12CORE.1.P.B_GATA2.H12CORE.1.P.B	Man2c1	0.066	0.053	0.013
chr7-109114530-109116326	4.381	0	GATA2.H12CORE.0.PSM.A_GATA2.H12CORE.0.PSM.A	1700095J03Rik	0.047	0.034	0.013
chr7-109114530-109116326	4.381	0	GATA2.H12CORE.1.P.B_GATA2.H12CORE.1.P.B	1700095J03Rik	0.047	0.034	0.013
chr7-109114530-109116326	4.381	0	GATA2.H12CORE.1.P.B_GATA2.H12CORE.1.P.B	1700095J03Rik	0.047	0.034	0.013
chr7-109114530-109116326	4.381	0	GATA2.H12CORE.0.PSM.A_GATA2.H12CORE.0.PSM.A	1700095J03Rik	0.047	0.034	0.013
chr7-109114530-109116326	4.381	0	GATA2.H12CORE.1.P.B_GATA2.H12CORE.1.P.B	1700095J03Rik	0.047	0.034	0.013
chr7-109114530-109116326	4.381	0	GATA2.H12CORE.1.P.B_GATA2.H12CORE.1.P.B	1700095J03Rik	0.047	0.034	0.013
chr5-114590119-114591611	4.601	0	GATA2.H12CORE.0.PSM.A_GATA2.H12CORE.0.PSM.A	Gm10401	0.016	0.003	0.014
chr5-114590119-114591611	4.601	0	GATA2.H12CORE.0.PSM.A_GATA2.H12CORE.0.PSM.A	Gm10401	0.016	0.003	0.014
chr5-114590119-114591611	4.601	0	GATA2.H12CORE.0.PSM.A_GATA2.H12CORE.0.PSM.A	Gm10401	0.016	0.003	0.014
chr5-114590119-114591611	4.601	0	GATA2.H12CORE.1.P.B_GATA2.H12CORE.1.P.B	Gm10401	0.016	0.003	0.014
chr5-114590119-114591611	4.601	0	GATA2.H12CORE.1.P.B_GATA2.H12CORE.1.P.B	Gm10401	0.016	0.003	0.014
chr5-114590119-114591611	4.601	0	GATA2.H12CORE.1.P.B_GATA2.H12CORE.1.P.B	Gm10401	0.016	0.003	0.014
chr2-33615521-33617065	-4.571	0	GATA2.H12CORE.1.P.B_GATA2.H12CORE.1.P.B	St6galnac4	0.055	0.042	0.014
chr2-33615521-33617065	-4.571	0	GATA2.H12CORE.1.P.B_GATA2.H12CORE.1.P.B	St6galnac4	0.055	0.042	0.014
chr16-5536240-5537519	2.786	0.003	GATA2.H12CORE.1.P.B_GATA2.H12CORE.1.P.B	Vasn	0.062	0.048	0.014
chr16-5536240-5537519	2.786	0.003	GATA2.H12CORE.1.P.B_GATA2.H12CORE.1.P.B	Vasn	0.062	0.048	0.014
chr14-54430422-54433714	2.91	0.002	GATA2.H12CORE.0.PSM.A_GATA2.H12CORE.0.PSM.A	Nfatc4	0.018	0.004	0.014
chr14-54430422-54433714	2.91	0.002	GATA2.H12CORE.1.P.B_GATA2.H12CORE.1.P.B	Nfatc4	0.018	0.004	0.014
chr14-54430422-54433714	2.91	0.002	GATA2.H12CORE.0.PSM.A_GATA2.H12CORE.0.PSM.A	Nfatc4	0.018	0.004	0.014
chr14-54430422-54433714	2.91	0.002	GATA2.H12CORE.1.P.B_GATA2.H12CORE.1.P.B	Nfatc4	0.018	0.004	0.014
chr14-54430422-54433714	-2.548	0.005	GATA2.H12CORE.0.PSM.A_GATA2.H12CORE.0.PSM.A	Rabggta	0.199	0.185	0.015
chr14-54430422-54433714	-2.548	0.005	GATA2.H12CORE.1.P.B_GATA2.H12CORE.1.P.B	Rabggta	0.199	0.185	0.015
chr14-54430422-54433714	-2.548	0.005	GATA2.H12CORE.0.PSM.A_GATA2.H12CORE.0.PSM.A	Rabggta	0.199	0.185	0.015
chr14-54430422-54433714	-2.548	0.005	GATA2.H12CORE.1.P.B_GATA2.H12CORE.1.P.B	Rabggta	0.199	0.185	0.015
chr7-30532717-30533299	2.337	0.01	GATA2.H12CORE.0.PSM.A_GATA2.H12CORE.0.PSM.A	Plekhg2	0.07	0.055	0.015
chr7-30532717-30533299	2.337	0.01	GATA2.H12CORE.0.PSM.A_GATA2.H12CORE.0.PSM.A	Plekhg2	0.07	0.055	0.015
chr4-140223702-140224803	-2.564	0.005	GATA2.H12CORE.0.PSM.A_GATA2.H12CORE.0.PSM.A	Crocc	0.04	0.024	0.015
chr4-140223702-140224803	-2.564	0.005	GATA2.H12CORE.0.PSM.A_GATA2.H12CORE.0.PSM.A	Crocc	0.04	0.024	0.015
chr4-140223702-140224803	-2.564	0.005	GATA2.H12CORE.1.P.B_GATA2.H12CORE.1.P.B	Crocc	0.04	0.024	0.015
chr4-140223702-140224803	-2.564	0.005	GATA2.H12CORE.0.PSM.A_GATA2.H12CORE.0.PSM.A	Crocc	0.04	0.024	0.015
chr4-140223702-140224803	-2.564	0.005	GATA2.H12CORE.0.PSM.A_GATA2.H12CORE.0.PSM.A	Crocc	0.04	0.024	0.015
chr4-140223702-140224803	-2.564	0.005	GATA2.H12CORE.1.P.B_GATA2.H12CORE.1.P.B	Crocc	0.04	0.024	0.015
chr5-139535260-139537387	2.347	0.009	GATA2.H12CORE.0.PSM.A_GATA2.H12CORE.0.PSM.A	3110082I17Rik	0.046	0.03	0.016
chr5-139535260-139537387	2.347	0.009	GATA2.H12CORE.1.P.B_GATA2.H12CORE.1.P.B	3110082I17Rik	0.046	0.03	0.016
chr5-139535260-139537387	2.347	0.009	GATA2.H12CORE.1.P.B_GATA2.H12CORE.1.P.B	3110082I17Rik	0.046	0.03	0.016
chr5-139535260-139537387	2.347	0.009	GATA2.H12CORE.0.PSM.A_GATA2.H12CORE.0.PSM.A	3110082I17Rik	0.046	0.03	0.016
chr5-139535260-139537387	2.347	0.009	GATA2.H12CORE.1.P.B_GATA2.H12CORE.1.P.B	3110082I17Rik	0.046	0.03	0.016
chr5-139535260-139537387	2.347	0.009	GATA2.H12CORE.1.P.B_GATA2.H12CORE.1.P.B	3110082I17Rik	0.046	0.03	0.016
chr9-107369329-107370687	5.562	0	GATA2.H12CORE.0.PSM.A_GATA2.H12CORE.0.PSM.A	Gm37850	0.019	0.003	0.016
chr9-107369329-107370687	5.562	0	GATA2.H12CORE.1.P.B_GATA2.H12CORE.1.P.B	Gm37850	0.019	0.003	0.016
chr3-108432245-108434266	-3.647	0	GATA2.H12CORE.0.PSM.A_GATA2.H12CORE.0.PSM.A	5330417C22Rik	0.047	0.029	0.017
chr3-108432245-108434266	-3.647	0	GATA2.H12CORE.1.P.B_GATA2.H12CORE.1.P.B	5330417C22Rik	0.047	0.029	0.017
chr3-108432245-108434266	-3.647	0	GATA2.H12CORE.0.PSM.A_GATA2.H12CORE.0.PSM.A	5330417C22Rik	0.047	0.029	0.017
chr3-108432245-108434266	-3.647	0	GATA2.H12CORE.1.P.B_GATA2.H12CORE.1.P.B	5330417C22Rik	0.047	0.029	0.017
chr17-34591473-34593464	2.493	0.006	GATA2.H12CORE.1.P.B_GATA2.H12CORE.1.P.B	Stk19	0.528	0.51	0.017
chr17-34591473-34593464	2.493	0.006	GATA2.H12CORE.1.P.B_GATA2.H12CORE.1.P.B	Stk19	0.528	0.51	0.017
chr11-84568349-84571029	2.452	0.007	GATA2.H12CORE.0.PSM.A_GATA2.H12CORE.0.PSM.A	Lhx1os	1.977	1.96	0.017
chr11-84568349-84571029	2.452	0.007	GATA2.H12CORE.1.P.B_GATA2.H12CORE.1.P.B	Lhx1os	1.977	1.96	0.017
chr11-84568349-84571029	2.452	0.007	GATA2.H12CORE.0.PSM.A_GATA2.H12CORE.0.PSM.A	Lhx1os	1.977	1.96	0.017
chr11-84568349-84571029	2.452	0.007	GATA2.H12CORE.1.P.B_GATA2.H12CORE.1.P.B	Lhx1os	1.977	1.96	0.017
chr14-29720032-29723145	2.61	0.005	GATA2.H12CORE.0.PSM.A_GATA2.H12CORE.0.PSM.A	Lrtm1	0.018	0.001	0.018
chr14-29720032-29723145	2.61	0.005	GATA2.H12CORE.1.P.B_GATA2.H12CORE.1.P.B	Lrtm1	0.018	0.001	0.018
chr14-29720032-29723145	2.61	0.005	GATA2.H12CORE.1.P.B_GATA2.H12CORE.1.P.B	Lrtm1	0.018	0.001	0.018
chr14-29720032-29723145	2.61	0.005	GATA2.H12CORE.0.PSM.A_GATA2.H12CORE.0.PSM.A	Lrtm1	0.018	0.001	0.018
chr14-29720032-29723145	2.61	0.005	GATA2.H12CORE.1.P.B_GATA2.H12CORE.1.P.B	Lrtm1	0.018	0.001	0.018
chr14-29720032-29723145	2.61	0.005	GATA2.H12CORE.1.P.B_GATA2.H12CORE.1.P.B	Lrtm1	0.018	0.001	0.018
chr1-132738799-132739614	-2.944	0.002	GATA2.H12CORE.1.P.B_GATA2.H12CORE.1.P.B	Dstyk	0.072	0.054	0.018
chr1-132738799-132739614	-2.944	0.002	GATA2.H12CORE.1.P.B_GATA2.H12CORE.1.P.B	Dstyk	0.072	0.054	0.018
chr2-26500037-26501126	3.729	0	GATA2.H12CORE.1.P.B_GATA2.H12CORE.1.P.B	Rexo4	0.282	0.264	0.019
chr2-26500037-26501126	3.729	0	GATA2.H12CORE.1.P.B_GATA2.H12CORE.1.P.B	Rexo4	0.282	0.264	0.019
chr12-80061772-80063302	3.164	0.001	GATA2.H12CORE.1.P.B_GATA2.H12CORE.1.P.B	Med6	0.55	0.531	0.019
chr12-80061772-80063302	3.164	0.001	GATA2.H12CORE.1.P.B_GATA2.H12CORE.1.P.B	Med6	0.55	0.531	0.019
chr7-109114530-109116326	2.854	0.002	GATA2.H12CORE.0.PSM.A_GATA2.H12CORE.0.PSM.A	Sbf2	0.452	0.433	0.019
chr7-109114530-109116326	2.854	0.002	GATA2.H12CORE.1.P.B_GATA2.H12CORE.1.P.B	Sbf2	0.452	0.433	0.019
chr7-109114530-109116326	2.854	0.002	GATA2.H12CORE.1.P.B_GATA2.H12CORE.1.P.B	Sbf2	0.452	0.433	0.019
chr7-109114530-109116326	2.854	0.002	GATA2.H12CORE.0.PSM.A_GATA2.H12CORE.0.PSM.A	Sbf2	0.452	0.433	0.019
chr7-109114530-109116326	2.854	0.002	GATA2.H12CORE.1.P.B_GATA2.H12CORE.1.P.B	Sbf2	0.452	0.433	0.019
chr7-109114530-109116326	2.854	0.002	GATA2.H12CORE.1.P.B_GATA2.H12CORE.1.P.B	Sbf2	0.452	0.433	0.019
chr11-61452734-61454369	-2.34	0.01	GATA2.H12CORE.0.PSM.A_GATA2.H12CORE.0.PSM.A	Prpsap2	0.331	0.312	0.019
chr11-61452734-61454369	-2.34	0.01	GATA2.H12CORE.1.P.B_GATA2.H12CORE.1.P.B	Prpsap2	0.331	0.312	0.019
chr11-61452734-61454369	-2.34	0.01	GATA2.H12CORE.0.PSM.A_GATA2.H12CORE.0.PSM.A	Prpsap2	0.331	0.312	0.019
chr11-61452734-61454369	-2.34	0.01	GATA2.H12CORE.1.P.B_GATA2.H12CORE.1.P.B	Prpsap2	0.331	0.312	0.019
chr2-33615521-33617065	-3.911	0	GATA2.H12CORE.1.P.B_GATA2.H12CORE.1.P.B	Rabepk	0.202	0.183	0.019
chr2-33615521-33617065	-3.911	0	GATA2.H12CORE.1.P.B_GATA2.H12CORE.1.P.B	Rabepk	0.202	0.183	0.019
chr9-57505347-57506328	3.913	0	GATA2.H12CORE.0.PSM.A_GATA2.H12CORE.0.PSM.A	Commd4	0.847	0.827	0.019
chr9-57505347-57506328	3.913	0	GATA2.H12CORE.1.P.B_GATA2.H12CORE.1.P.B	Commd4	0.847	0.827	0.019
chr9-57505347-57506328	3.913	0	GATA2.H12CORE.0.PSM.A_GATA2.H12CORE.0.PSM.A	Commd4	0.847	0.827	0.019
chr9-57505347-57506328	3.913	0	GATA2.H12CORE.1.P.B_GATA2.H12CORE.1.P.B	Commd4	0.847	0.827	0.019
chr17-56761704-56762622	-2.46	0.007	GATA2.H12CORE.0.PSM.A_GATA2.H12CORE.0.PSM.A	Tnfsf9	0.038	0.018	0.019
chr17-56761704-56762622	-2.46	0.007	GATA2.H12CORE.1.P.B_GATA2.H12CORE.1.P.B	Tnfsf9	0.038	0.018	0.019
chr17-56761704-56762622	-2.46	0.007	GATA2.H12CORE.0.PSM.A_GATA2.H12CORE.0.PSM.A	Tnfsf9	0.038	0.018	0.019
chr17-56761704-56762622	-2.46	0.007	GATA2.H12CORE.1.P.B_GATA2.H12CORE.1.P.B	Tnfsf9	0.038	0.018	0.019
chr9-107369329-107370687	4.392	0	GATA2.H12CORE.0.PSM.A_GATA2.H12CORE.0.PSM.A	Mon1a	0.184	0.164	0.02
chr9-107369329-107370687	4.392	0	GATA2.H12CORE.1.P.B_GATA2.H12CORE.1.P.B	Mon1a	0.184	0.164	0.02
chr9-107369329-107370687	4.392	0	GATA2.H12CORE.0.PSM.A_GATA2.H12CORE.0.PSM.A	Mon1a	0.184	0.164	0.02
chr9-107369329-107370687	4.392	0	GATA2.H12CORE.1.P.B_GATA2.H12CORE.1.P.B	Mon1a	0.184	0.164	0.02
chr4-117834704-117836804	-2.452	0.007	GATA2.H12CORE.1.P.B_GATA2.H12CORE.1.P.B	St3gal3	0.104	0.085	0.02
chr4-117834704-117836804	-2.452	0.007	GATA2.H12CORE.1.P.B_GATA2.H12CORE.1.P.B	St3gal3	0.104	0.085	0.02
chr14-54430422-54433714	2.833	0.002	GATA2.H12CORE.0.PSM.A_GATA2.H12CORE.0.PSM.A	Nop9	0.257	0.237	0.02
chr14-54430422-54433714	2.833	0.002	GATA2.H12CORE.1.P.B_GATA2.H12CORE.1.P.B	Nop9	0.257	0.237	0.02
chr14-54430422-54433714	2.833	0.002	GATA2.H12CORE.0.PSM.A_GATA2.H12CORE.0.PSM.A	Nop9	0.257	0.237	0.02
chr14-54430422-54433714	2.833	0.002	GATA2.H12CORE.1.P.B_GATA2.H12CORE.1.P.B	Nop9	0.257	0.237	0.02
chr4-109224475-109225927	-4.195	0	GATA2.H12CORE.0.PSM.A_GATA2.H12CORE.0.PSM.A	Zfyve9	0.183	0.163	0.02
chr4-109224475-109225927	-4.195	0	GATA2.H12CORE.1.P.B_GATA2.H12CORE.1.P.B	Zfyve9	0.183	0.163	0.02
chr4-109224475-109225927	-4.195	0	GATA2.H12CORE.0.PSM.A_GATA2.H12CORE.0.PSM.A	Zfyve9	0.183	0.163	0.02
chr4-109224475-109225927	-4.195	0	GATA2.H12CORE.1.P.B_GATA2.H12CORE.1.P.B	Zfyve9	0.183	0.163	0.02
chr14-54430422-54433714	3.311	0	GATA2.H12CORE.0.PSM.A_GATA2.H12CORE.0.PSM.A	Abhd4	0.043	0.022	0.021
chr14-54430422-54433714	3.311	0	GATA2.H12CORE.1.P.B_GATA2.H12CORE.1.P.B	Abhd4	0.043	0.022	0.021
chr14-54430422-54433714	3.311	0	GATA2.H12CORE.0.PSM.A_GATA2.H12CORE.0.PSM.A	Abhd4	0.043	0.022	0.021
chr14-54430422-54433714	3.311	0	GATA2.H12CORE.1.P.B_GATA2.H12CORE.1.P.B	Abhd4	0.043	0.022	0.021
chr12-80061772-80063302	3.895	0	GATA2.H12CORE.1.P.B_GATA2.H12CORE.1.P.B	Actn1	0.062	0.041	0.021
chr12-80061772-80063302	3.895	0	GATA2.H12CORE.1.P.B_GATA2.H12CORE.1.P.B	Actn1	0.062	0.041	0.021
chr2-33615521-33617065	-3.245	0.001	GATA2.H12CORE.1.P.B_GATA2.H12CORE.1.P.B	Zbtb43	0.261	0.24	0.021
chr2-33615521-33617065	-3.245	0.001	GATA2.H12CORE.1.P.B_GATA2.H12CORE.1.P.B	Zbtb43	0.261	0.24	0.021
chr4-109224475-109225927	-4.566	0	GATA2.H12CORE.0.PSM.A_GATA2.H12CORE.0.PSM.A	Rnf11	0.895	0.873	0.021
chr4-109224475-109225927	-4.566	0	GATA2.H12CORE.1.P.B_GATA2.H12CORE.1.P.B	Rnf11	0.895	0.873	0.021
chr4-109224475-109225927	-4.566	0	GATA2.H12CORE.0.PSM.A_GATA2.H12CORE.0.PSM.A	Rnf11	0.895	0.873	0.021
chr4-109224475-109225927	-4.566	0	GATA2.H12CORE.1.P.B_GATA2.H12CORE.1.P.B	Rnf11	0.895	0.873	0.021
chr3-108432245-108434266	6.556	0	GATA2.H12CORE.0.PSM.A_GATA2.H12CORE.0.PSM.A	Psrc1	0.045	0.023	0.022
chr3-108432245-108434266	6.556	0	GATA2.H12CORE.1.P.B_GATA2.H12CORE.1.P.B	Psrc1	0.045	0.023	0.022
chr3-108432245-108434266	6.556	0	GATA2.H12CORE.0.PSM.A_GATA2.H12CORE.0.PSM.A	Psrc1	0.045	0.023	0.022
chr3-108432245-108434266	6.556	0	GATA2.H12CORE.1.P.B_GATA2.H12CORE.1.P.B	Psrc1	0.045	0.023	0.022
chr1-75445085-75447030	-2.354	0.009	GATA2.H12CORE.0.PSM.A_GATA2.H12CORE.0.PSM.A	Stk11ip	0.054	0.032	0.022
chr1-75445085-75447030	-2.354	0.009	GATA2.H12CORE.1.P.B_GATA2.H12CORE.1.P.B	Stk11ip	0.054	0.032	0.022
chr1-75445085-75447030	-2.354	0.009	GATA2.H12CORE.0.PSM.A_GATA2.H12CORE.0.PSM.A	Stk11ip	0.054	0.032	0.022
chr1-75445085-75447030	-2.354	0.009	GATA2.H12CORE.1.P.B_GATA2.H12CORE.1.P.B	Stk11ip	0.054	0.032	0.022
chr4-117644634-117647845	-2.569	0.005	GATA2.H12CORE.0.PSM.A_GATA2.H12CORE.0.PSM.A	Tmem53	0.158	0.135	0.023
chr4-117644634-117647845	-2.569	0.005	GATA2.H12CORE.1.P.B_GATA2.H12CORE.1.P.B	Tmem53	0.158	0.135	0.023
chr4-117644634-117647845	-2.569	0.005	GATA2.H12CORE.0.PSM.A_GATA2.H12CORE.0.PSM.A	Tmem53	0.158	0.135	0.023
chr4-117644634-117647845	-2.569	0.005	GATA2.H12CORE.1.P.B_GATA2.H12CORE.1.P.B	Tmem53	0.158	0.135	0.023
chr4-47449028-47450664	2.734	0.003	GATA2.H12CORE.0.PSM.A_GATA2.H12CORE.0.PSM.A	Invs	0.062	0.039	0.023
chr4-47449028-47450664	2.734	0.003	GATA2.H12CORE.1.P.B_GATA2.H12CORE.1.P.B	Invs	0.062	0.039	0.023
chr4-47449028-47450664	2.734	0.003	GATA2.H12CORE.0.PSM.A_GATA2.H12CORE.0.PSM.A	Invs	0.062	0.039	0.023
chr4-47449028-47450664	2.734	0.003	GATA2.H12CORE.1.P.B_GATA2.H12CORE.1.P.B	Invs	0.062	0.039	0.023
chr11-84568349-84571029	2.912	0.002	GATA2.H12CORE.0.PSM.A_GATA2.H12CORE.0.PSM.A	Lhx1	1.797	1.775	0.023
chr11-84568349-84571029	2.912	0.002	GATA2.H12CORE.1.P.B_GATA2.H12CORE.1.P.B	Lhx1	1.797	1.775	0.023
chr11-84568349-84571029	2.912	0.002	GATA2.H12CORE.0.PSM.A_GATA2.H12CORE.0.PSM.A	Lhx1	1.797	1.775	0.023
chr11-84568349-84571029	2.912	0.002	GATA2.H12CORE.1.P.B_GATA2.H12CORE.1.P.B	Lhx1	1.797	1.775	0.023
chr18-64264544-64266944	4.321	0	GATA2.H12CORE.0.PSM.A_GATA2.H12CORE.0.PSM.A	Onecut2	0.261	0.238	0.023
chr18-64264544-64266944	4.321	0	GATA2.H12CORE.0.PSM.A_GATA2.H12CORE.0.PSM.A	Onecut2	0.261	0.238	0.023
chr7-30532717-30533299	-2.703	0.003	GATA2.H12CORE.0.PSM.A_GATA2.H12CORE.0.PSM.A	Map3k10	0.337	0.314	0.024
chr7-30532717-30533299	-2.703	0.003	GATA2.H12CORE.0.PSM.A_GATA2.H12CORE.0.PSM.A	Map3k10	0.337	0.314	0.024
chr14-54430422-54433714	2.937	0.002	GATA2.H12CORE.0.PSM.A_GATA2.H12CORE.0.PSM.A	Lrp10	0.126	0.102	0.024
chr14-54430422-54433714	2.937	0.002	GATA2.H12CORE.1.P.B_GATA2.H12CORE.1.P.B	Lrp10	0.126	0.102	0.024
chr14-54430422-54433714	2.937	0.002	GATA2.H12CORE.0.PSM.A_GATA2.H12CORE.0.PSM.A	Lrp10	0.126	0.102	0.024
chr14-54430422-54433714	2.937	0.002	GATA2.H12CORE.1.P.B_GATA2.H12CORE.1.P.B	Lrp10	0.126	0.102	0.024
chr2-33615521-33617065	-2.971	0.001	GATA2.H12CORE.1.P.B_GATA2.H12CORE.1.P.B	Angptl2	0.043	0.019	0.024
chr2-33615521-33617065	-2.971	0.001	GATA2.H12CORE.1.P.B_GATA2.H12CORE.1.P.B	Angptl2	0.043	0.019	0.024
chr7-30532717-30533299	-2.419	0.008	GATA2.H12CORE.0.PSM.A_GATA2.H12CORE.0.PSM.A	Fxyd7	0.062	0.037	0.025
chr7-30532717-30533299	-2.419	0.008	GATA2.H12CORE.0.PSM.A_GATA2.H12CORE.0.PSM.A	Fxyd7	0.062	0.037	0.025
chr11-102227380-102228571	-3.728	0	GATA2.H12CORE.0.PSM.A_GATA2.H12CORE.0.PSM.A	G6pc3	0.241	0.216	0.025
chr11-102227380-102228571	-3.728	0	GATA2.H12CORE.1.P.B_GATA2.H12CORE.1.P.B	G6pc3	0.241	0.216	0.025
chr11-102227380-102228571	-3.728	0	GATA2.H12CORE.0.PSM.A_GATA2.H12CORE.0.PSM.A	G6pc3	0.241	0.216	0.025
chr11-102227380-102228571	-3.728	0	GATA2.H12CORE.1.P.B_GATA2.H12CORE.1.P.B	G6pc3	0.241	0.216	0.025
chr4-115056171-115058012	4.841	0	GATA2.H12CORE.0.PSM.A_GATA2.H12CORE.0.PSM.A	Cyp4x1	0.047	0.021	0.025
chr4-115056171-115058012	4.841	0	GATA2.H12CORE.1.P.B_GATA2.H12CORE.1.P.B	Cyp4x1	0.047	0.021	0.025
chr4-115056171-115058012	4.841	0	GATA2.H12CORE.0.PSM.A_GATA2.H12CORE.0.PSM.A	Cyp4x1	0.047	0.021	0.025
chr4-115056171-115058012	4.841	0	GATA2.H12CORE.1.P.B_GATA2.H12CORE.1.P.B	Cyp4x1	0.047	0.021	0.025
chr16-33605399-33607413	-2.633	0.004	GATA2.H12CORE.0.PSM.A_GATA2.H12CORE.0.PSM.A	Snx4	0.458	0.433	0.025
chr16-33605399-33607413	-2.633	0.004	GATA2.H12CORE.0.PSM.A_GATA2.H12CORE.0.PSM.A	Snx4	0.458	0.433	0.025
chr6-50890150-50891937	3.51	0	GATA2.H12CORE.0.PSM.A_GATA2.H12CORE.0.PSM.A	Nfe2l3	0.057	0.031	0.025
chr6-50890150-50891937	3.51	0	GATA2.H12CORE.0.PSM.A_GATA2.H12CORE.0.PSM.A	Nfe2l3	0.057	0.031	0.025
chr6-50890150-50891937	3.51	0	GATA2.H12CORE.1.P.B_GATA2.H12CORE.1.P.B	Nfe2l3	0.057	0.031	0.025
chr6-50890150-50891937	3.51	0	GATA2.H12CORE.1.P.B_GATA2.H12CORE.1.P.B	Nfe2l3	0.057	0.031	0.025
chr6-50890150-50891937	3.51	0	GATA2.H12CORE.1.P.B_GATA2.H12CORE.1.P.B	Nfe2l3	0.057	0.031	0.025
chr6-50890150-50891937	3.51	0	GATA2.H12CORE.0.PSM.A_GATA2.H12CORE.0.PSM.A	Nfe2l3	0.057	0.031	0.025
chr6-50890150-50891937	3.51	0	GATA2.H12CORE.0.PSM.A_GATA2.H12CORE.0.PSM.A	Nfe2l3	0.057	0.031	0.025
chr6-50890150-50891937	3.51	0	GATA2.H12CORE.1.P.B_GATA2.H12CORE.1.P.B	Nfe2l3	0.057	0.031	0.025
chr6-50890150-50891937	3.51	0	GATA2.H12CORE.1.P.B_GATA2.H12CORE.1.P.B	Nfe2l3	0.057	0.031	0.025
chr6-50890150-50891937	3.51	0	GATA2.H12CORE.1.P.B_GATA2.H12CORE.1.P.B	Nfe2l3	0.057	0.031	0.025
chr9-107369329-107370687	2.653	0.004	GATA2.H12CORE.0.PSM.A_GATA2.H12CORE.0.PSM.A	Nprl2	0.338	0.312	0.026
chr9-107369329-107370687	2.653	0.004	GATA2.H12CORE.1.P.B_GATA2.H12CORE.1.P.B	Nprl2	0.338	0.312	0.026
chr9-107369329-107370687	2.653	0.004	GATA2.H12CORE.0.PSM.A_GATA2.H12CORE.0.PSM.A	Nprl2	0.338	0.312	0.026
chr9-107369329-107370687	2.653	0.004	GATA2.H12CORE.1.P.B_GATA2.H12CORE.1.P.B	Nprl2	0.338	0.312	0.026
chr9-107369329-107370687	3.436	0	GATA2.H12CORE.0.PSM.A_GATA2.H12CORE.0.PSM.A	Sema3f	0.284	0.258	0.026
chr9-107369329-107370687	3.436	0	GATA2.H12CORE.1.P.B_GATA2.H12CORE.1.P.B	Sema3f	0.284	0.258	0.026
chr9-107369329-107370687	3.436	0	GATA2.H12CORE.0.PSM.A_GATA2.H12CORE.0.PSM.A	Sema3f	0.284	0.258	0.026
chr9-107369329-107370687	3.436	0	GATA2.H12CORE.1.P.B_GATA2.H12CORE.1.P.B	Sema3f	0.284	0.258	0.026
chr9-107722761-107724418	3.038	0.001	GATA2.H12CORE.0.PSM.A_GATA2.H12CORE.0.PSM.A	Sema3f	0.284	0.258	0.026
chr9-107722761-107724418	3.038	0.001	GATA2.H12CORE.1.P.B_GATA2.H12CORE.1.P.B	Sema3f	0.284	0.258	0.026
chr9-107722761-107724418	3.038	0.001	GATA2.H12CORE.1.P.B_GATA2.H12CORE.1.P.B	Sema3f	0.284	0.258	0.026
chr9-107722761-107724418	3.038	0.001	GATA2.H12CORE.0.PSM.A_GATA2.H12CORE.0.PSM.A	Sema3f	0.284	0.258	0.026
chr9-107722761-107724418	3.038	0.001	GATA2.H12CORE.1.P.B_GATA2.H12CORE.1.P.B	Sema3f	0.284	0.258	0.026
chr9-107722761-107724418	3.038	0.001	GATA2.H12CORE.1.P.B_GATA2.H12CORE.1.P.B	Sema3f	0.284	0.258	0.026
chr9-107722761-107724418	-2.696	0.004	GATA2.H12CORE.0.PSM.A_GATA2.H12CORE.0.PSM.A	Gmppb	0.151	0.125	0.026
chr9-107722761-107724418	-2.696	0.004	GATA2.H12CORE.1.P.B_GATA2.H12CORE.1.P.B	Gmppb	0.151	0.125	0.026
chr9-107722761-107724418	-2.696	0.004	GATA2.H12CORE.1.P.B_GATA2.H12CORE.1.P.B	Gmppb	0.151	0.125	0.026
chr9-107722761-107724418	-2.696	0.004	GATA2.H12CORE.0.PSM.A_GATA2.H12CORE.0.PSM.A	Gmppb	0.151	0.125	0.026
chr9-107722761-107724418	-2.696	0.004	GATA2.H12CORE.1.P.B_GATA2.H12CORE.1.P.B	Gmppb	0.151	0.125	0.026
chr9-107722761-107724418	-2.696	0.004	GATA2.H12CORE.1.P.B_GATA2.H12CORE.1.P.B	Gmppb	0.151	0.125	0.026
chr8-84729810-84732148	2.82	0.002	GATA2.H12CORE.0.PSM.A_GATA2.H12CORE.0.PSM.A	Man2b1	0.075	0.048	0.027
chr8-84729810-84732148	2.82	0.002	GATA2.H12CORE.1.P.B_GATA2.H12CORE.1.P.B	Man2b1	0.075	0.048	0.027
chr8-84729810-84732148	2.82	0.002	GATA2.H12CORE.1.P.B_GATA2.H12CORE.1.P.B	Man2b1	0.075	0.048	0.027
chr8-84729810-84732148	2.82	0.002	GATA2.H12CORE.0.PSM.A_GATA2.H12CORE.0.PSM.A	Man2b1	0.075	0.048	0.027
chr8-84729810-84732148	2.82	0.002	GATA2.H12CORE.1.P.B_GATA2.H12CORE.1.P.B	Man2b1	0.075	0.048	0.027
chr8-84729810-84732148	2.82	0.002	GATA2.H12CORE.1.P.B_GATA2.H12CORE.1.P.B	Man2b1	0.075	0.048	0.027
chr8-122719602-122721611	-2.614	0.004	GATA2.H12CORE.0.PSM.A_GATA2.H12CORE.0.PSM.A	Pard3	0.444	0.416	0.028
chr8-122719602-122721611	-2.614	0.004	GATA2.H12CORE.1.P.B_GATA2.H12CORE.1.P.B	Pard3	0.444	0.416	0.028
chr8-122719602-122721611	-2.614	0.004	GATA2.H12CORE.1.P.B_GATA2.H12CORE.1.P.B	Pard3	0.444	0.416	0.028
chr8-122719602-122721611	-2.614	0.004	GATA2.H12CORE.0.PSM.A_GATA2.H12CORE.0.PSM.A	Pard3	0.444	0.416	0.028
chr8-122719602-122721611	-2.614	0.004	GATA2.H12CORE.1.P.B_GATA2.H12CORE.1.P.B	Pard3	0.444	0.416	0.028
chr8-122719602-122721611	-2.614	0.004	GATA2.H12CORE.1.P.B_GATA2.H12CORE.1.P.B	Pard3	0.444	0.416	0.028
chr7-109190630-109192251	3.024	0.001	GATA2.H12CORE.0.PSM.A_GATA2.H12CORE.0.PSM.A	Akip1	0.062	0.034	0.029
chr7-109190630-109192251	3.024	0.001	GATA2.H12CORE.0.PSM.A_GATA2.H12CORE.0.PSM.A	Akip1	0.062	0.034	0.029
chr2-33615521-33617065	-4.171	0	GATA2.H12CORE.1.P.B_GATA2.H12CORE.1.P.B	Tor2a	0.333	0.304	0.029
chr2-33615521-33617065	-4.171	0	GATA2.H12CORE.1.P.B_GATA2.H12CORE.1.P.B	Tor2a	0.333	0.304	0.029
chr6-91718169-91721642	-2.455	0.007	GATA2.H12CORE.1.P.B_GATA2.H12CORE.1.P.B	4930590J08Rik	0.069	0.04	0.029
chr6-91718169-91721642	-2.455	0.007	GATA2.H12CORE.1.P.B_GATA2.H12CORE.1.P.B	4930590J08Rik	0.069	0.04	0.029
chr7-18923592-18926858	2.809	0.002	GATA2.H12CORE.1.P.B_GATA2.H12CORE.1.P.B	Irf2bp1	0.604	0.574	0.029
chr9-57505347-57506328	2.801	0.003	GATA2.H12CORE.0.PSM.A_GATA2.H12CORE.0.PSM.A	2700012I20Rik	0.046	0.015	0.03
chr9-57505347-57506328	2.801	0.003	GATA2.H12CORE.1.P.B_GATA2.H12CORE.1.P.B	2700012I20Rik	0.046	0.015	0.03
chr9-57505347-57506328	2.801	0.003	GATA2.H12CORE.0.PSM.A_GATA2.H12CORE.0.PSM.A	2700012I20Rik	0.046	0.015	0.03
chr9-57505347-57506328	2.801	0.003	GATA2.H12CORE.1.P.B_GATA2.H12CORE.1.P.B	2700012I20Rik	0.046	0.015	0.03
chr4-109224475-109225927	3.238	0.001	GATA2.H12CORE.0.PSM.A_GATA2.H12CORE.0.PSM.A	Dmrta2	0.041	0.011	0.03
chr4-109224475-109225927	3.238	0.001	GATA2.H12CORE.1.P.B_GATA2.H12CORE.1.P.B	Dmrta2	0.041	0.011	0.03
chr4-109224475-109225927	3.238	0.001	GATA2.H12CORE.0.PSM.A_GATA2.H12CORE.0.PSM.A	Dmrta2	0.041	0.011	0.03
chr4-109224475-109225927	3.238	0.001	GATA2.H12CORE.1.P.B_GATA2.H12CORE.1.P.B	Dmrta2	0.041	0.011	0.03
chr4-109224475-109225927	2.675	0.004	GATA2.H12CORE.0.PSM.A_GATA2.H12CORE.0.PSM.A	Cc2d1b	0.083	0.052	0.03
chr4-109224475-109225927	2.675	0.004	GATA2.H12CORE.1.P.B_GATA2.H12CORE.1.P.B	Cc2d1b	0.083	0.052	0.03
chr4-109224475-109225927	2.675	0.004	GATA2.H12CORE.0.PSM.A_GATA2.H12CORE.0.PSM.A	Cc2d1b	0.083	0.052	0.03
chr4-109224475-109225927	2.675	0.004	GATA2.H12CORE.1.P.B_GATA2.H12CORE.1.P.B	Cc2d1b	0.083	0.052	0.03
chr14-54430422-54433714	-3.307	0	GATA2.H12CORE.0.PSM.A_GATA2.H12CORE.0.PSM.A	Psme1	0.861	0.831	0.031
chr14-54430422-54433714	-3.307	0	GATA2.H12CORE.1.P.B_GATA2.H12CORE.1.P.B	Psme1	0.861	0.831	0.031
chr14-54430422-54433714	-3.307	0	GATA2.H12CORE.0.PSM.A_GATA2.H12CORE.0.PSM.A	Psme1	0.861	0.831	0.031
chr14-54430422-54433714	-3.307	0	GATA2.H12CORE.1.P.B_GATA2.H12CORE.1.P.B	Psme1	0.861	0.831	0.031
chr7-109190630-109192251	3.31	0	GATA2.H12CORE.0.PSM.A_GATA2.H12CORE.0.PSM.A	Rrp8	0.257	0.226	0.031
chr7-109190630-109192251	3.31	0	GATA2.H12CORE.0.PSM.A_GATA2.H12CORE.0.PSM.A	Rrp8	0.257	0.226	0.031
chr11-84568349-84571029	2.331	0.01	GATA2.H12CORE.0.PSM.A_GATA2.H12CORE.0.PSM.A	Znhit3	0.533	0.502	0.031
chr11-84568349-84571029	2.331	0.01	GATA2.H12CORE.1.P.B_GATA2.H12CORE.1.P.B	Znhit3	0.533	0.502	0.031
chr11-84568349-84571029	2.331	0.01	GATA2.H12CORE.0.PSM.A_GATA2.H12CORE.0.PSM.A	Znhit3	0.533	0.502	0.031
chr11-84568349-84571029	2.331	0.01	GATA2.H12CORE.1.P.B_GATA2.H12CORE.1.P.B	Znhit3	0.533	0.502	0.031
chr10-60193379-60195507	-2.822	0.002	GATA2.H12CORE.1.P.B_GATA2.H12CORE.1.P.B	Micu1	0.306	0.274	0.031
chr10-60193379-60195507	-2.822	0.002	GATA2.H12CORE.1.P.B_GATA2.H12CORE.1.P.B	Micu1	0.306	0.274	0.031
chr5-31086447-31087076	4.406	0	GATA2.H12CORE.1.P.B_GATA2.H12CORE.1.P.B	Eif2b4	0.398	0.366	0.032
chr5-31086447-31087076	4.406	0	GATA2.H12CORE.1.P.B_GATA2.H12CORE.1.P.B	Eif2b4	0.398	0.366	0.032
chr12-80061772-80063302	-3.716	0	GATA2.H12CORE.1.P.B_GATA2.H12CORE.1.P.B	Ccdc177	0.395	0.363	0.032
chr12-80061772-80063302	-3.716	0	GATA2.H12CORE.1.P.B_GATA2.H12CORE.1.P.B	Ccdc177	0.395	0.363	0.032
chr1-157054283-157056162	-3.315	0	GATA2.H12CORE.0.PSM.A_GATA2.H12CORE.0.PSM.A	Soat1	0.062	0.03	0.032
[truncated: 1,177 more rows]

## Sheet: Gata3 targets
feature	zscore	links_pvalue	TFBS_name	gene_name	GA1_2_exp_avg_log2	GL1_2_exp_avg_log2	avg_log2FC
[truncated: 3,506 more rows]

[truncated: 1 more sheets: Vsx2 targets]
